# Supplementary material for: Transcription Adaptation during In Vitro Adipogenesis and Osteogenesis of Porcine Mesenchymal Stem Cells: Dynamics of Pathways, Biological Processes, Up-Stream Regulators, and Gene Networks
Source: PLoS One. 2015 Sep 23;10(9):e0137644. doi: 10.1371/journal.pone.0137644 (PMC4580618; doi:10.1371/journal.pone.0137644)
Supplement: S8 File — The Excel file contains 16 sheets (one for each k-mean cluster) with the results from the Functional Annotation Clustering of terms by DAVID analysis. (XLSX) [file pone.0137644.s023.xlsx]

## Sheet: Functional cluster 1
Annotation Cluster 1	Enrichment Score: 5.22532387183652
Category	Term	Count	%	PValue	Genes	List Total	Pop Hits	Pop Total	Fold Enrichment	Bonferroni	Benjamini	FDR
GOTERM_CC_FAT	GO:0005856~cytoskeleton	32	26.8908	1.07303e-08	822, 5108, 10174, 7846, 800, 347733, 2316, 57584, 10544, 983, 7168, 84790, 55605, 3796, 653888, 3799, 64780, 55075, 27436, 7461, 4478, 5493, 9181, 10627, 83541, 4627, 57127, 7171, 2036, 402, 9645, 51474	92	714	6172	3.0067	2.25337e-06	2.25337e-06	1.35568e-05
SP_PIR_KEYWORDS	cytoskeleton	21	17.6471	2.58583e-07	64780, 5108, 55075, 10174, 800, 2316, 57584, 7461, 5493, 4478, 9181, 7168, 83541, 7171, 2036, 3796, 402, 9645, 51474, 653888, 3799	119	381	8445	3.91153	5.84381e-05	5.84381e-05	0.000330585
GOTERM_CC_FAT	GO:0044430~cytoskeletal part	23	19.3277	8.1502e-07	64780, 822, 5108, 7846, 347733, 800, 27436, 10544, 7461, 983, 9181, 10627, 7168, 83541, 4627, 84790, 7171, 55605, 3796, 402, 51474, 653888, 3799	92	472	6172	3.26907	0.00017114	8.55734e-05	0.0010297
GOTERM_CC_FAT	GO:0015630~microtubule cytoskeleton	15	12.605	0.000160014	5108, 7846, 347733, 27436, 10544, 7461, 983, 9181, 83541, 4627, 84790, 3796, 55605, 402, 3799	92	311	6172	3.23571	0.0330472	0.0111394	0.201975
GOTERM_CC_FAT	GO:0043228~non-membrane-bounded organelle	37	31.0924	0.000350557	5108, 822, 10174, 7846, 6124, 800, 347733, 2316, 57584, 5371, 10544, 983, 7168, 84790, 3796, 55605, 10445, 81887, 653888, 3799, 64780, 55075, 27436, 10987, 7461, 4478, 5493, 9181, 10627, 83541, 4627, 57127, 7171, 2036, 402, 9645, 51474	92	1437	6172	1.72736	0.0709845	0.0146181	0.441993
GOTERM_CC_FAT	GO:0043232~intracellular non-membrane-bounded organelle	37	31.0924	0.000350557	5108, 822, 10174, 7846, 6124, 800, 347733, 2316, 57584, 5371, 10544, 983, 7168, 84790, 3796, 55605, 10445, 81887, 653888, 3799, 64780, 55075, 27436, 10987, 7461, 4478, 5493, 9181, 10627, 83541, 4627, 57127, 7171, 2036, 402, 9645, 51474	92	1437	6172	1.72736	0.0709845	0.0146181	0.441993
Annotation Cluster 2	Enrichment Score: 2.44271097114026
Category	Term	Count	%	PValue	Genes	List Total	Pop Hits	Pop Total	Fold Enrichment	Bonferroni	Benjamini	FDR
UCSC_TFBS	BACH1	74	62.1849	0.000945458	6124, 1191, 7846, 800, 3339, 10404, 3281, 9246, 57584, 10544, 5371, 55884, 401494, 2745, 7168, 26227, 55605, 81887, 4154, 10659, 26526, 64121, 5269, 64780, 831, 64744, 2014, 7508, 5493, 163, 3956, 9110, 9645, 51474, 824, 84293, 1435, 10174, 2316, 928, 23152, 961, 10014, 84695, 2771, 26578, 11179, 23327, 84790, 3796, 29087, 10466, 10113, 653888, 23524, 6717, 57142, 10493, 27436, 857, 54749, 23564,…	118	4023	8425	1.31332	0.15416	0.0803045	1.15512
UCSC_TFBS	BACH2	64	53.7815	0.00291565	6124, 1191, 942, 800, 3339, 10404, 9246, 5371, 3625, 55884, 401494, 55605, 4154, 10659, 26526, 64121, 64780, 64744, 831, 2014, 7508, 10437, 5493, 163, 9110, 553115, 9645, 51474, 824, 84293, 1435, 10174, 347733, 2316, 928, 23152, 961, 3895, 10014, 84695, 2771, 11179, 84790, 23327, 3796, 29087, 92745, 653888, 57142, 27436, 857, 54749, 23564, 7461, 4478, 5998, 5396, 83541, 6383, 4627, 7533, 2036, 13…	118	3443	8425	1.32718	0.403588	0.121207	3.52294
UCSC_TFBS	AP1	79	66.3866	0.0170408	6124, 1191, 800, 3339, 10404, 9246, 57584, 7453, 10544, 5371, 55884, 7168, 3633, 140606, 55605, 4154, 10659, 64121, 26526, 64780, 831, 64744, 2014, 7508, 5493, 10437, 3956, 163, 9110, 7171, 7078, 9645, 51474, 824, 84293, 1435, 5108, 822, 10174, 347733, 2316, 928, 55768, 23152, 2783, 8076, 10014, 84695, 2771, 11179, 23327, 84790, 3796, 29087, 10466, 653888, 23524, 57142, 4673, 10493, 27436, 857, 5…	118	4776	8425	1.181	0.952271	0.241616	19.0318
Annotation Cluster 3	Enrichment Score: 2.05487074658882
Category	Term	Count	%	PValue	Genes	List Total	Pop Hits	Pop Total	Fold Enrichment	Bonferroni	Benjamini	FDR
GOTERM_BP_FAT	GO:0007520~myoblast fusion	3	2.52101	0.00425688	824, 831, 4627	97	7	6549	28.9352	0.99412	0.642008	6.66687
GOTERM_BP_FAT	GO:0000768~syncytium formation by plasma membrane fusion	3	2.52101	0.00562181	824, 831, 4627	97	8	6549	25.3183	0.998873	0.620796	8.71468
GOTERM_BP_FAT	GO:0042692~muscle cell differentiation	6	5.04202	0.00584307	824, 3956, 7168, 831, 4627, 4154	97	79	6549	5.12776	0.999138	0.58603	9.04264
GOTERM_BP_FAT	GO:0006949~syncytium formation	3	2.52101	0.00715932	824, 831, 4627	97	9	6549	22.5052	0.999825	0.578983	10.9709
GOTERM_BP_FAT	GO:0014902~myotube differentiation	3	2.52101	0.00886415	824, 831, 4627	97	10	6549	20.2546	0.999978	0.590711	13.4114
GOTERM_BP_FAT	GO:0051146~striated muscle cell differentiation	4	3.36134	0.0528029	824, 7168, 831, 4627	97	58	6549	4.65624	1	0.837048	58.4127
Annotation Cluster 4	Enrichment Score: 1.9914867297972578
Category	Term	Count	%	PValue	Genes	List Total	Pop Hits	Pop Total	Fold Enrichment	Bonferroni	Benjamini	FDR
GOTERM_MF_FAT	GO:0008092~cytoskeletal protein binding	18	15.1261	4.05713e-06	824, 822, 10174, 800, 2316, 7461, 4478, 9181, 7168, 6383, 4627, 57127, 7533, 7171, 2036, 51474, 653888, 3799	91	331	6200	3.70506	0.000977293	0.000977293	0.00524006
GOTERM_MF_FAT	GO:0003779~actin binding	11	9.2437	0.000740683	4478, 822, 7168, 4627, 800, 2316, 7533, 7171, 2036, 51474, 653888	91	206	6200	3.63811	0.163535	0.0854155	0.952456
SP_PIR_KEYWORDS	actin-binding	9	7.56303	0.00142808	822, 7168, 4627, 800, 2316, 7171, 2036, 51474, 653888	119	155	8445	4.12063	0.276009	0.0775704	1.81045
GOTERM_CC_FAT	GO:0015629~actin cytoskeleton	9	7.56303	0.00467562	822, 7168, 10627, 4627, 800, 2316, 7171, 51474, 653888	92	179	6172	3.37309	0.626256	0.151284	5.74917
SP_PIR_KEYWORDS	actin binding	4	3.36134	0.0106942	4478, 7168, 800, 2316	119	33	8445	8.60199	0.911956	0.384908	12.8428
SP_PIR_KEYWORDS	muscle protein	4	3.36134	0.0218773	7168, 10627, 800, 7171	119	43	8445	6.60152	0.993256	0.393419	24.6326
GOTERM_BP_FAT	GO:0007010~cytoskeleton organization	10	8.40336	0.0219056	9181, 64780, 5108, 7168, 4627, 800, 2316, 2036, 857, 51474	97	282	6549	2.39417	1	0.702447	30.1085
GOTERM_BP_FAT	GO:0030036~actin cytoskeleton organization	7	5.88235	0.0258076	9181, 7168, 4627, 800, 2316, 2036, 51474	97	155	6549	3.04909	1	0.730634	34.4841
GOTERM_BP_FAT	GO:0030029~actin filament-based process	7	5.88235	0.0371982	9181, 7168, 4627, 800, 2316, 2036, 51474	97	169	6549	2.7965	1	0.7706	45.8329
GOTERM_BP_FAT	GO:0007015~actin filament organization	4	3.36134	0.042217	9181, 800, 2316, 51474	97	53	6549	5.09551	1	0.792731	50.2233
GOTERM_MF_FAT	GO:0051015~actin filament binding	3	2.52101	0.095587	4627, 2316, 51474	91	36	6200	5.67766	1	0.889328	72.683
GOTERM_CC_FAT	GO:0005938~cell cortex	4	3.36134	0.157282	4627, 800, 2316, 857	92	93	6172	2.88546	1	0.849133	88.4903
GOTERM_BP_FAT	GO:0006928~cell motion	7	5.88235	0.205917	4478, 7168, 4627, 800, 928, 7171, 653888	97	271	6549	1.74394	1	0.958863	97.5984
Annotation Cluster 5	Enrichment Score: 1.7163613202706784
Category	Term	Count	%	PValue	Genes	List Total	Pop Hits	Pop Total	Fold Enrichment	Bonferroni	Benjamini	FDR
UP_SEQ_FEATURE	domain:LIM zinc-binding	3	2.52101	0.0116757	64780, 9645, 51474	119	12	8439	17.729	0.994992	0.994992	15.3522
SP_PIR_KEYWORDS	LIM domain	4	3.36134	0.0192799	1397, 64780, 9645, 51474	119	41	8445	6.92355	0.98772	0.386679	22.0335
INTERPRO	IPR001781:Zinc finger, LIM-type	4	3.36134	0.0234629	1397, 64780, 9645, 51474	115	42	7752	6.41988	0.998703	0.890952	26.9432
SMART	SM00132:LIM	4	3.36134	0.0258098	1397, 64780, 9645, 51474	64	42	4108	6.1131	0.84379	0.84379	23.769
Annotation Cluster 6	Enrichment Score: 1.581656607565241
Category	Term	Count	%	PValue	Genes	List Total	Pop Hits	Pop Total	Fold Enrichment	Bonferroni	Benjamini	FDR
GOTERM_BP_FAT	GO:0051493~regulation of cytoskeleton organization	7	5.88235	0.00244651	9181, 822, 7168, 10174, 857, 51474, 653888	97	94	6549	5.02775	0.947619	0.521597	3.88424
GOTERM_MF_FAT	GO:0005200~structural constituent of cytoskeleton	5	4.20168	0.00425576	5493, 4478, 7168, 10174, 653888	91	46	6200	7.40564	0.642216	0.290084	5.3595
GOTERM_BP_FAT	GO:0033043~regulation of organelle organization	8	6.72269	0.00520482	9181, 822, 7168, 10174, 857, 5371, 51474, 653888	97	145	6549	3.72499	0.998132	0.649067	8.09358
GOTERM_BP_FAT	GO:0032956~regulation of actin cytoskeleton organization	5	4.20168	0.0113031	822, 7168, 10174, 51474, 653888	97	60	6549	5.62629	0.999999	0.623789	16.794
GOTERM_BP_FAT	GO:0044087~regulation of cellular component biogenesis	6	5.04202	0.0119903	822, 7168, 10174, 1191, 857, 653888	97	94	6549	4.3095	1	0.620248	17.7244
GOTERM_BP_FAT	GO:0032970~regulation of actin filament-based process	5	4.20168	0.0126477	822, 7168, 10174, 51474, 653888	97	62	6549	5.4448	1	0.616268	18.6054
GOTERM_BP_FAT	GO:0010638~positive regulation of organelle organization	4	3.36134	0.042217	7168, 10174, 857, 5371	97	53	6549	5.09551	1	0.792731	50.2233
GOTERM_BP_FAT	GO:0043254~regulation of protein complex assembly	4	3.36134	0.0550602	822, 1191, 857, 653888	97	59	6549	4.57732	1	0.833774	59.9869
GOTERM_BP_FAT	GO:0051495~positive regulation of cytoskeleton organization	3	2.52101	0.0668506	7168, 10174, 857	97	29	6549	6.98436	1	0.868903	67.3405
GOTERM_BP_FAT	GO:0051130~positive regulation of cellular component organization	5	4.20168	0.079493	7168, 10174, 23327, 857, 5371	97	111	6549	3.04124	1	0.890975	73.8063
GOTERM_BP_FAT	GO:0008064~regulation of actin polymerization or depolymerization	3	2.52101	0.1257	822, 51474, 653888	97	42	6549	4.82253	1	0.923251	88.6118
GOTERM_BP_FAT	GO:0030832~regulation of actin filament length	3	2.52101	0.130628	822, 51474, 653888	97	43	6549	4.71038	1	0.928169	89.6067
GOTERM_BP_FAT	GO:0032271~regulation of protein polymerization	3	2.52101	0.145668	822, 857, 653888	97	46	6549	4.40318	1	0.935889	92.1627
Annotation Cluster 7	Enrichment Score: 1.5373654645470247
Category	Term	Count	%	PValue	Genes	List Total	Pop Hits	Pop Total	Fold Enrichment	Bonferroni	Benjamini	FDR
GOTERM_BP_FAT	GO:0051493~regulation of cytoskeleton organization	7	5.88235	0.00244651	9181, 822, 7168, 10174, 857, 51474, 653888	97	94	6549	5.02775	0.947619	0.521597	3.88424
GOTERM_BP_FAT	GO:0033043~regulation of organelle organization	8	6.72269	0.00520482	9181, 822, 7168, 10174, 857, 5371, 51474, 653888	97	145	6549	3.72499	0.998132	0.649067	8.09358
GOTERM_BP_FAT	GO:0051129~negative regulation of cellular component organization	6	5.04202	0.0100482	9181, 57142, 822, 1191, 7533, 51474	97	90	6549	4.50103	0.999995	0.607542	15.0694
GOTERM_BP_FAT	GO:0043242~negative regulation of protein complex disassembly	3	2.52101	0.0668506	9181, 822, 51474	97	29	6549	6.98436	1	0.868903	67.3405
GOTERM_BP_FAT	GO:0043244~regulation of protein complex disassembly	3	2.52101	0.0881753	9181, 822, 51474	97	34	6549	5.95725	1	0.886866	77.5286
GOTERM_BP_FAT	GO:0051494~negative regulation of cytoskeleton organization	3	2.52101	0.115987	9181, 822, 51474	97	40	6549	5.06366	1	0.915743	86.3838
GOTERM_BP_FAT	GO:0010639~negative regulation of organelle organization	3	2.52101	0.197942	9181, 822, 51474	97	56	6549	3.6169	1	0.956036	97.1772
Annotation Cluster 8	Enrichment Score: 1.3789960403728359
Category	Term	Count	%	PValue	Genes	List Total	Pop Hits	Pop Total	Fold Enrichment	Bonferroni	Benjamini	FDR
GOTERM_MF_FAT	GO:0030414~peptidase inhibitor activity	5	4.20168	0.0201893	5269, 831, 7078, 135228, 56925	91	72	6200	4.73138	0.992667	0.625845	23.1592
GOTERM_MF_FAT	GO:0004866~endopeptidase inhibitor activity	5	4.20168	0.0201893	5269, 831, 7078, 135228, 56925	91	72	6200	4.73138	0.992667	0.625845	23.1592
GOTERM_MF_FAT	GO:0004857~enzyme inhibitor activity	6	5.04202	0.061857	5269, 831, 7078, 402, 135228, 56925	91	147	6200	2.78089	1	0.853915	56.1644
SP_PIR_KEYWORDS	protease inhibitor	3	2.52101	0.120888	5269, 831, 135228	119	43	8445	4.95114	1	0.801644	80.741
Annotation Cluster 9	Enrichment Score: 1.3736548010563194
Category	Term	Count	%	PValue	Genes	List Total	Pop Hits	Pop Total	Fold Enrichment	Bonferroni	Benjamini	FDR
GOTERM_BP_FAT	GO:0030036~actin cytoskeleton organization	7	5.88235	0.0258076	9181, 7168, 4627, 800, 2316, 2036, 51474	97	155	6549	3.04909	1	0.730634	34.4841
GOTERM_BP_FAT	GO:0030029~actin filament-based process	7	5.88235	0.0371982	9181, 7168, 4627, 800, 2316, 2036, 51474	97	169	6549	2.7965	1	0.7706	45.8329
GOTERM_CC_FAT	GO:0001725~stress fiber	3	2.52101	0.0376519	7168, 4627, 51474	92	21	6172	9.58385	0.999684	0.634851	38.4231
GOTERM_CC_FAT	GO:0032432~actin filament bundle	3	2.52101	0.0445122	7168, 4627, 51474	92	23	6172	8.75047	0.99993	0.65439	43.7447
GOTERM_CC_FAT	GO:0042641~actomyosin	3	2.52101	0.0481028	7168, 4627, 51474	92	24	6172	8.38587	0.999968	0.644867	46.358
GOTERM_BP_FAT	GO:0030030~cell projection organization	7	5.88235	0.0740225	822, 5108, 7168, 1191, 4627, 26227, 51474	97	201	6549	2.35128	1	0.883905	71.1719
Annotation Cluster 10	Enrichment Score: 1.3704035528329637
Category	Term	Count	%	PValue	Genes	List Total	Pop Hits	Pop Total	Fold Enrichment	Bonferroni	Benjamini	FDR
GOTERM_BP_FAT	GO:0042692~muscle cell differentiation	6	5.04202	0.00584307	824, 3956, 7168, 831, 4627, 4154	97	79	6549	5.12776	0.999138	0.58603	9.04264
GOTERM_BP_FAT	GO:0043009~chordate embryonic development	8	6.72269	0.0135807	824, 5396, 7168, 4627, 3339, 26227, 6423, 4154	97	174	6549	3.10416	1	0.620319	19.8404
GOTERM_BP_FAT	GO:0009792~embryonic development ending in birth or egg hatching	8	6.72269	0.0139811	824, 5396, 7168, 4627, 3339, 26227, 6423, 4154	97	175	6549	3.08642	1	0.610066	20.365
GOTERM_BP_FAT	GO:0001701~in utero embryonic development	4	3.36134	0.206747	824, 7168, 4627, 4154	97	107	6549	2.52394	1	0.95795	97.6387
GOTERM_BP_FAT	GO:0048598~embryonic morphogenesis	3	2.52101	0.612969	5396, 3339, 4154	97	140	6549	1.44676	1	0.99771	100
Annotation Cluster 11	Enrichment Score: 1.2197669770494004
Category	Term	Count	%	PValue	Genes	List Total	Pop Hits	Pop Total	Fold Enrichment	Bonferroni	Benjamini	FDR
GOTERM_BP_FAT	GO:0007017~microtubule-based process	11	9.2437	4.08313e-05	5108, 7846, 4627, 347733, 84790, 3796, 55605, 857, 27436, 3799, 3895	97	143	6549	5.1935	0.047973	0.047973	0.0660175
GOTERM_BP_FAT	GO:0007018~microtubule-based movement	7	5.88235	8.00755e-05	7846, 347733, 84790, 3796, 55605, 3799, 3895	97	50	6549	9.45216	0.0919127	0.0470639	0.129431
GOTERM_CC_FAT	GO:0015630~microtubule cytoskeleton	15	12.605	0.000160014	5108, 7846, 347733, 27436, 10544, 7461, 983, 9181, 83541, 4627, 84790, 3796, 55605, 402, 3799	92	311	6172	3.23571	0.0330472	0.0111394	0.201975
SP_PIR_KEYWORDS	microtubule	9	7.56303	0.000292819	9181, 7846, 347733, 84790, 3796, 55605, 27436, 7461, 3799	119	122	8445	5.23523	0.0640439	0.0325518	0.373709
GOTERM_CC_FAT	GO:0005874~microtubule	10	8.40336	0.000301811	9181, 7846, 347733, 84790, 3796, 55605, 27436, 7461, 983, 3799	92	148	6172	4.5329	0.0614224	0.0157225	0.38064
SP_PIR_KEYWORDS	motor protein	5	4.20168	0.0134224	10627, 4627, 3796, 55605, 3799	119	66	8445	5.37624	0.95283	0.353566	15.8661
GOTERM_MF_FAT	GO:0003774~motor activity	5	4.20168	0.0230872	10627, 4627, 3796, 55605, 3799	91	75	6200	4.54212	0.996409	0.608672	26.0433
UP_SEQ_FEATURE	domain:Kinesin-motor	3	2.52101	0.0283883	3796, 55605, 3799	119	19	8439	11.1973	0.999998	0.998488	33.5487
INTERPRO	IPR001752:Kinesin, motor region	3	2.52101	0.0311447	3796, 55605, 3799	115	19	7752	10.6435	0.999858	0.82998	34.1871
INTERPRO	IPR019821:Kinesin, motor region, conserved site	3	2.52101	0.0311447	3796, 55605, 3799	115	19	7752	10.6435	0.999858	0.82998	34.1871
SMART	SM00129:KISc	3	2.52101	0.0334755	3796, 55605, 3799	64	19	4108	10.1349	0.910852	0.701423	29.7702
GOTERM_MF_FAT	GO:0003777~microtubule motor activity	3	2.52101	0.0911071	3796, 55605, 3799	91	35	6200	5.83987	1	0.899964	70.8828
SP_PIR_KEYWORDS	ATP	3	2.52101	0.662282	7453, 983, 3799	119	161	8445	1.32236	1	0.994592	99.9999
SP_PIR_KEYWORDS	nucleotide-binding	12	10.084	0.759701	64121, 2771, 7846, 4627, 347733, 84790, 3796, 55605, 7453, 402, 983, 3799	119	926	8445	0.919651	1	0.996136	100
GOTERM_MF_FAT	GO:0032555~purine ribonucleotide binding	12	10.084	0.868868	64121, 2771, 7846, 4627, 347733, 84790, 3796, 55605, 7453, 402, 983, 3799	91	987	6200	0.828351	1	0.999996	100
GOTERM_MF_FAT	GO:0032553~ribonucleotide binding	12	10.084	0.868868	64121, 2771, 7846, 4627, 347733, 84790, 3796, 55605, 7453, 402, 983, 3799	91	987	6200	0.828351	1	0.999996	100
GOTERM_MF_FAT	GO:0000166~nucleotide binding	15	12.605	0.882894	64121, 9991, 7846, 347733, 7453, 983, 2771, 4627, 26227, 84790, 3796, 55605, 402, 3799, 10659	91	1235	6200	0.827513	1	0.999998	100
GOTERM_MF_FAT	GO:0017076~purine nucleotide binding	12	10.084	0.908816	64121, 2771, 7846, 4627, 347733, 84790, 3796, 55605, 7453, 402, 983, 3799	91	1040	6200	0.786137	1	0.999999	100
UP_SEQ_FEATURE	nucleotide phosphate-binding region:ATP	5	4.20168	0.923272	4627, 3796, 55605, 983, 3799	119	497	8439	0.71344	1	1	100
SP_PIR_KEYWORDS	atp-binding	6	5.04202	0.979135	4627, 3796, 55605, 7453, 983, 3799	119	729	8445	0.584085	1	0.999995	100
GOTERM_MF_FAT	GO:0001883~purine nucleoside binding	7	5.88235	0.990994	64121, 4627, 3796, 55605, 7453, 983, 3799	91	869	6200	0.548818	1	1	100
GOTERM_MF_FAT	GO:0001882~nucleoside binding	7	5.88235	0.991471	64121, 4627, 3796, 55605, 7453, 983, 3799	91	874	6200	0.545679	1	1	100
GOTERM_MF_FAT	GO:0005524~ATP binding	6	5.04202	0.993228	4627, 3796, 55605, 7453, 983, 3799	91	797	6200	0.512912	1	1	100
GOTERM_MF_FAT	GO:0032559~adenyl ribonucleotide binding	6	5.04202	0.993897	4627, 3796, 55605, 7453, 983, 3799	91	806	6200	0.507185	1	1	100
GOTERM_MF_FAT	GO:0030554~adenyl nucleotide binding	6	5.04202	0.996694	4627, 3796, 55605, 7453, 983, 3799	91	858	6200	0.476447	1	1	100
Annotation Cluster 12	Enrichment Score: 1.1926588878321691
Category	Term	Count	%	PValue	Genes	List Total	Pop Hits	Pop Total	Fold Enrichment	Bonferroni	Benjamini	FDR
KEGG_PATHWAY	hsa05130:Pathogenic Escherichia coli infection	5	4.20168	0.00183203	9181, 7846, 347733, 84790, 653888	43	36	2795	9.02778	0.0959351	0.0959351	1.78744
KEGG_PATHWAY	hsa04540:Gap junction	5	4.20168	0.00531148	2771, 7846, 347733, 84790, 983	43	48	2795	6.77083	0.253911	0.136235	5.10337
GOTERM_BP_FAT	GO:0051258~protein polymerization	4	3.36134	0.00621567	7846, 347733, 84790, 857	97	26	6549	10.387	0.999451	0.565741	9.59242
PIR_SUPERFAMILY	PIRSF002306:tubulin	3	2.52101	0.00690761	7846, 347733, 84790	55	9	3739	22.6606	0.358291	0.358291	6.79959
INTERPRO	IPR000217:Tubulin	3	2.52101	0.00721411	7846, 347733, 84790	115	9	7752	22.4696	0.868306	0.868306	9.12937
INTERPRO	IPR018316:Tubulin/FtsZ, 2-layer sandwich domain	3	2.52101	0.00721411	7846, 347733, 84790	115	9	7752	22.4696	0.868306	0.868306	9.12937
INTERPRO	IPR017975:Tubulin, conserved site	3	2.52101	0.00721411	7846, 347733, 84790	115	9	7752	22.4696	0.868306	0.868306	9.12937
INTERPRO	IPR003008:Tubulin/FtsZ, GTPase domain	3	2.52101	0.00893145	7846, 347733, 84790	115	10	7752	20.2226	0.918897	0.715215	11.1859
GOTERM_BP_FAT	GO:0043623~cellular protein complex assembly	6	5.04202	0.0264108	7846, 347733, 2316, 84790, 857, 402	97	115	6549	3.52255	1	0.724466	35.1371
GOTERM_BP_FAT	GO:0034622~cellular macromolecular complex assembly	8	6.72269	0.0276061	7846, 347733, 4673, 2316, 84790, 857, 402, 4154	97	201	6549	2.68718	1	0.726472	36.413
GOTERM_MF_FAT	GO:0003924~GTPase activity	6	5.04202	0.0400386	64121, 2771, 7846, 347733, 84790, 2783	91	130	6200	3.14455	0.999947	0.755081	41.0084
GOTERM_BP_FAT	GO:0034621~cellular macromolecular complex subunit organization	8	6.72269	0.0464594	7846, 347733, 4673, 2316, 84790, 857, 402, 4154	97	225	6549	2.40055	1	0.814491	53.6718
UP_SEQ_FEATURE	nucleotide phosphate-binding region:GTP	6	5.04202	0.0733155	64121, 2771, 7846, 347733, 84790, 402	119	160	8439	2.65935	1	0.999813	66.0597
UP_TISSUE	Cajal-Retzius cell	6	5.04202	0.0841399	3956, 7846, 347733, 7171, 84790, 23564	116	168	8283	2.55018	0.999974	0.616654	63.5393
SP_PIR_KEYWORDS	gtp-binding	6	5.04202	0.105388	64121, 2771, 7846, 347733, 84790, 402	119	179	8445	2.37876	1	0.792585	75.919
GOTERM_MF_FAT	GO:0005525~GTP binding	6	5.04202	0.171621	64121, 2771, 7846, 347733, 84790, 402	91	203	6200	2.01375	1	0.969514	91.2129
GOTERM_MF_FAT	GO:0032561~guanyl ribonucleotide binding	6	5.04202	0.176477	64121, 2771, 7846, 347733, 84790, 402	91	205	6200	1.9941	1	0.955824	91.8555
GOTERM_MF_FAT	GO:0019001~guanyl nucleotide binding	6	5.04202	0.176477	64121, 2771, 7846, 347733, 84790, 402	91	205	6200	1.9941	1	0.955824	91.8555
GOTERM_BP_FAT	GO:0065003~macromolecular complex assembly	10	8.40336	0.17747	822, 7846, 347733, 4673, 2316, 84790, 857, 5371, 402, 4154	97	430	6549	1.57013	1	0.950989	95.7566
GOTERM_BP_FAT	GO:0043933~macromolecular complex subunit organization	10	8.40336	0.219773	822, 7846, 347733, 4673, 2316, 84790, 857, 5371, 402, 4154	97	454	6549	1.48712	1	0.959759	98.1935
GOTERM_BP_FAT	GO:0070271~protein complex biogenesis	8	6.72269	0.230268	822, 7846, 347733, 2316, 84790, 857, 5371, 402	97	340	6549	1.5886	1	0.961167	98.5488
GOTERM_BP_FAT	GO:0006461~protein complex assembly	8	6.72269	0.230268	822, 7846, 347733, 2316, 84790, 857, 5371, 402	97	340	6549	1.5886	1	0.961167	98.5488
SP_PIR_KEYWORDS	nucleotide-binding	12	10.084	0.759701	64121, 2771, 7846, 4627, 347733, 84790, 3796, 55605, 7453, 402, 983, 3799	119	926	8445	0.919651	1	0.996136	100
GOTERM_MF_FAT	GO:0032555~purine ribonucleotide binding	12	10.084	0.868868	64121, 2771, 7846, 4627, 347733, 84790, 3796, 55605, 7453, 402, 983, 3799	91	987	6200	0.828351	1	0.999996	100
GOTERM_MF_FAT	GO:0032553~ribonucleotide binding	12	10.084	0.868868	64121, 2771, 7846, 4627, 347733, 84790, 3796, 55605, 7453, 402, 983, 3799	91	987	6200	0.828351	1	0.999996	100
GOTERM_MF_FAT	GO:0000166~nucleotide binding	15	12.605	0.882894	64121, 9991, 7846, 347733, 7453, 983, 2771, 4627, 26227, 84790, 3796, 55605, 402, 3799, 10659	91	1235	6200	0.827513	1	0.999998	100
GOTERM_MF_FAT	GO:0017076~purine nucleotide binding	12	10.084	0.908816	64121, 2771, 7846, 4627, 347733, 84790, 3796, 55605, 7453, 402, 983, 3799	91	1040	6200	0.786137	1	0.999999	100
Annotation Cluster 13	Enrichment Score: 1.1716714611576928
Category	Term	Count	%	PValue	Genes	List Total	Pop Hits	Pop Total	Fold Enrichment	Bonferroni	Benjamini	FDR
GOTERM_BP_FAT	GO:0032535~regulation of cellular component size	8	6.72269	0.0179747	64121, 57142, 822, 2014, 10493, 5371, 51474, 653888	97	184	6549	2.93545	1	0.664429	25.4244
GOTERM_BP_FAT	GO:0040007~growth	5	4.20168	0.0621728	64121, 2014, 10493, 7078, 3625	97	102	6549	3.30958	1	0.862158	64.5895
GOTERM_BP_FAT	GO:0016049~cell growth	3	2.52101	0.1257	64121, 2014, 10493	97	42	6549	4.82253	1	0.923251	88.6118
GOTERM_BP_FAT	GO:0008361~regulation of cell size	5	4.20168	0.146459	64121, 57142, 2014, 10493, 5371	97	139	6549	2.42861	1	0.934377	92.2792
Annotation Cluster 14	Enrichment Score: 1.0545520298261841
Category	Term	Count	%	PValue	Genes	List Total	Pop Hits	Pop Total	Fold Enrichment	Bonferroni	Benjamini	FDR
GOTERM_BP_FAT	GO:0051493~regulation of cytoskeleton organization	7	5.88235	0.00244651	9181, 822, 7168, 10174, 857, 51474, 653888	97	94	6549	5.02775	0.947619	0.521597	3.88424
GOTERM_CC_FAT	GO:0070161~anchoring junction	5	4.20168	0.0687608	5493, 10174, 4627, 857, 51474	92	105	6172	3.19462	1	0.743344	59.3446
GOTERM_CC_FAT	GO:0030054~cell junction	8	6.72269	0.0787151	5493, 9181, 3060, 10174, 4627, 57584, 857, 51474	92	253	6172	2.12133	1	0.707646	64.5063
GOTERM_CC_FAT	GO:0016323~basolateral plasma membrane	5	4.20168	0.100452	4478, 10174, 57127, 857, 51474	92	120	6172	2.79529	1	0.772834	73.7491
SP_PIR_KEYWORDS	cell junction	6	5.04202	0.103538	5493, 9181, 3060, 10174, 57584, 51474	119	178	8445	2.39213	1	0.80733	75.2746
GOTERM_CC_FAT	GO:0005912~adherens junction	4	3.36134	0.16802	10174, 4627, 857, 51474	92	96	6172	2.79529	1	0.855061	90.2118
GOTERM_CC_FAT	GO:0005925~focal adhesion	3	2.52101	0.221343	10174, 857, 51474	92	60	6172	3.35435	1	0.898155	95.761
GOTERM_CC_FAT	GO:0005924~cell-substrate adherens junction	3	2.52101	0.237729	10174, 857, 51474	92	63	6172	3.19462	1	0.907006	96.7599
GOTERM_CC_FAT	GO:0030055~cell-substrate junction	3	2.52101	0.265166	10174, 857, 51474	92	68	6172	2.95972	1	0.92484	97.961
Annotation Cluster 15	Enrichment Score: 1.002786550571976
Category	Term	Count	%	PValue	Genes	List Total	Pop Hits	Pop Total	Fold Enrichment	Bonferroni	Benjamini	FDR
GOTERM_BP_FAT	GO:0051651~maintenance of location in cell	4	3.36134	0.0177756	6717, 2316, 857, 5371	97	38	6549	7.10689	1	0.679073	25.1794
GOTERM_BP_FAT	GO:0051235~maintenance of location	4	3.36134	0.0311013	6717, 2316, 857, 5371	97	47	6549	5.746	1	0.742978	40.0105
GOTERM_BP_FAT	GO:0032507~maintenance of protein location in cell	3	2.52101	0.0794199	2316, 857, 5371	97	32	6549	6.32957	1	0.896105	73.7726
GOTERM_BP_FAT	GO:0045185~maintenance of protein location	3	2.52101	0.0972034	2316, 857, 5371	97	36	6549	5.62629	1	0.893384	80.869
GOTERM_BP_FAT	GO:0051248~negative regulation of protein metabolic process	4	3.36134	0.301326	2316, 857, 5371, 7078	97	131	6549	2.06154	1	0.978819	99.697
GOTERM_MF_FAT	GO:0019899~enzyme binding	5	4.20168	0.748223	9181, 2316, 7533, 857, 5371	91	346	6200	0.984565	1	0.999875	100
Annotation Cluster 16	Enrichment Score: 0.9727148206227972
Category	Term	Count	%	PValue	Genes	List Total	Pop Hits	Pop Total	Fold Enrichment	Bonferroni	Benjamini	FDR
INTERPRO	IPR019782:WD40 repeat 2	6	5.04202	0.0550618	55605, 27436, 10113, 55884, 2783, 653888	115	140	7752	2.88894	1	0.928853	52.7094
INTERPRO	IPR017986:WD40 repeat, region	6	5.04202	0.0621727	55605, 27436, 10113, 55884, 2783, 653888	115	145	7752	2.78933	1	0.923279	57.2044
INTERPRO	IPR019781:WD40 repeat, subgroup	6	5.04202	0.0666785	55605, 27436, 10113, 55884, 2783, 653888	115	148	7752	2.73278	1	0.91065	59.8447
UP_SEQ_FEATURE	repeat:WD 3	6	5.04202	0.0780004	55605, 27436, 10113, 55884, 2783, 653888	119	163	8439	2.6104	1	0.999341	68.4153
SP_PIR_KEYWORDS	wd repeat	6	5.04202	0.0842979	55605, 27436, 10113, 55884, 2783, 653888	119	167	8445	2.54969	1	0.758674	67.5625
UP_SEQ_FEATURE	repeat:WD 2	6	5.04202	0.0844935	55605, 27436, 10113, 55884, 2783, 653888	119	167	8439	2.54788	1	0.998687	71.4294
UP_SEQ_FEATURE	repeat:WD 1	6	5.04202	0.0844935	55605, 27436, 10113, 55884, 2783, 653888	119	167	8439	2.54788	1	0.998687	71.4294
INTERPRO	IPR001680:WD40 repeat	6	5.04202	0.0900473	55605, 27436, 10113, 55884, 2783, 653888	115	162	7752	2.49662	1	0.946908	71.2834
INTERPRO	IPR019775:WD40 repeat, conserved site	6	5.04202	0.0993065	55605, 27436, 10113, 55884, 2783, 653888	115	167	7752	2.42187	1	0.946524	74.9157
SMART	SM00320:WD40	6	5.04202	0.101099	55605, 27436, 10113, 55884, 2783, 653888	64	162	4108	2.37731	0.999483	0.919738	66.9199
INTERPRO	IPR015943:WD40/YVTN repeat-like	6	5.04202	0.127654	55605, 27436, 10113, 55884, 2783, 653888	115	181	7752	2.23454	1	0.958688	83.5651
UP_SEQ_FEATURE	repeat:WD 5	5	4.20168	0.145036	55605, 27436, 55884, 2783, 653888	119	145	8439	2.44538	1	0.999854	89.1797
UP_SEQ_FEATURE	repeat:WD 4	5	4.20168	0.168845	55605, 27436, 55884, 2783, 653888	119	154	8439	2.30247	1	0.999491	92.7528
UP_SEQ_FEATURE	repeat:WD 6	4	3.36134	0.235714	55605, 27436, 2783, 653888	119	120	8439	2.36387	1	0.999911	97.7959
UP_SEQ_FEATURE	repeat:WD 7	3	2.52101	0.359504	55605, 27436, 2783	119	90	8439	2.36387	1	0.999993	99.8205
Annotation Cluster 17	Enrichment Score: 0.9264593210462387
Category	Term	Count	%	PValue	Genes	List Total	Pop Hits	Pop Total	Fold Enrichment	Bonferroni	Benjamini	FDR
GOTERM_BP_FAT	GO:0050821~protein stabilization	3	2.52101	0.0372704	10437, 2316, 5371	97	21	6549	9.64507	1	0.760476	45.8985
GOTERM_BP_FAT	GO:0031647~regulation of protein stability	3	2.52101	0.070961	10437, 2316, 5371	97	30	6549	6.75155	1	0.878762	69.5911
GOTERM_BP_FAT	GO:0010608~posttranscriptional regulation of gene expression	3	2.52101	0.628403	10437, 2316, 5371	97	144	6549	1.40657	1	0.997853	100
Annotation Cluster 18	Enrichment Score: 0.9145685988799555
Category	Term	Count	%	PValue	Genes	List Total	Pop Hits	Pop Total	Fold Enrichment	Bonferroni	Benjamini	FDR
GOTERM_BP_FAT	GO:0014706~striated muscle tissue development	4	3.36134	0.109126	7168, 3339, 857, 4154	97	79	6549	3.4185	1	0.909165	84.5702
GOTERM_BP_FAT	GO:0060537~muscle tissue development	4	3.36134	0.121749	7168, 3339, 857, 4154	97	83	6549	3.25376	1	0.919628	87.7505
GOTERM_BP_FAT	GO:0007517~muscle organ development	5	4.20168	0.1358	6717, 7168, 3339, 857, 4154	97	135	6549	2.50057	1	0.933026	90.5629
Annotation Cluster 19	Enrichment Score: 0.8524909239435229
Category	Term	Count	%	PValue	Genes	List Total	Pop Hits	Pop Total	Fold Enrichment	Bonferroni	Benjamini	FDR
GOTERM_BP_FAT	GO:0051051~negative regulation of transport	6	5.04202	0.00874224	2771, 55075, 3060, 2316, 23327, 3625	97	87	6549	4.65624	0.999974	0.617522	13.239
GOTERM_BP_FAT	GO:0007186~G-protein coupled receptor protein signaling pathway	5	4.20168	0.527196	2771, 3060, 2316, 143502, 2783	97	258	6549	1.30844	1	0.995188	99.9995
GOTERM_BP_FAT	GO:0019932~second-messenger-mediated signaling	3	2.52101	0.60108	2771, 3060, 2316	97	137	6549	1.47844	1	0.997786	100
Annotation Cluster 20	Enrichment Score: 0.7904499189087993
Category	Term	Count	%	PValue	Genes	List Total	Pop Hits	Pop Total	Fold Enrichment	Bonferroni	Benjamini	FDR
GOTERM_BP_FAT	GO:0044057~regulation of system process	8	6.72269	0.0189615	6717, 2771, 7168, 3060, 7533, 857, 3625, 10659	97	186	6549	2.90389	1	0.666318	26.6272
GOTERM_BP_FAT	GO:0050804~regulation of synaptic transmission	3	2.52101	0.306631	2771, 3060, 7533	97	76	6549	2.66508	1	0.97909	99.7322
GOTERM_BP_FAT	GO:0051969~regulation of transmission of nerve impulse	3	2.52101	0.333685	2771, 3060, 7533	97	81	6549	2.50057	1	0.97997	99.8593
GOTERM_BP_FAT	GO:0031644~regulation of neurological system process	3	2.52101	0.35512	2771, 3060, 7533	97	85	6549	2.3829	1	0.980009	99.9171
Annotation Cluster 21	Enrichment Score: 0.7841116022708944
Category	Term	Count	%	PValue	Genes	List Total	Pop Hits	Pop Total	Fold Enrichment	Bonferroni	Benjamini	FDR
INTERPRO	IPR018247:EF-HAND 1	6	5.04202	0.0296661	824, 6717, 10627, 553115, 5371, 27436	115	118	7752	3.42756	0.999782	0.878526	32.8467
UP_SEQ_FEATURE	domain:EF-hand 3	4	3.36134	0.0341442	824, 6717, 10627, 553115	119	51	8439	5.56204	1	0.994607	38.9222
COG_ONTOLOGY	Signal transduction mechanisms / Cytoskeleton / Cell division and chromosome partitioning / General function prediction only	3	2.52101	0.0492168	824, 10627, 553115	13	27	883	7.54701	0.297622	0.297622	22.9092
INTERPRO	IPR002048:Calcium-binding EF-hand	4	3.36134	0.110083	824, 6717, 10627, 553115	115	79	7752	3.4131	1	0.94863	78.6066
SP_PIR_KEYWORDS	EF hand	3	2.52101	0.111724	824, 6717, 10627	119	41	8445	5.19266	1	0.792991	78.0108
SMART	SM00054:EFh	4	3.36134	0.119963	824, 6717, 10627, 553115	64	79	4108	3.25	0.999885	0.896512	73.4561
UP_SEQ_FEATURE	domain:EF-hand 2	4	3.36134	0.150736	824, 6717, 10627, 553115	119	96	8439	2.95483	1	0.999722	90.1597
UP_SEQ_FEATURE	domain:EF-hand 1	4	3.36134	0.154058	824, 6717, 10627, 553115	119	97	8439	2.92437	1	0.999471	90.6919
INTERPRO	IPR018249:EF-HAND 2	4	3.36134	0.227469	824, 6717, 10627, 553115	115	112	7752	2.40745	1	0.991913	96.704
UP_SEQ_FEATURE	calcium-binding region:2	3	2.52101	0.235551	824, 6717, 553115	119	66	8439	3.22345	1	0.999959	97.7892
UP_SEQ_FEATURE	calcium-binding region:1	3	2.52101	0.256321	824, 6717, 553115	119	70	8439	3.03926	1	0.999864	98.5045
SP_PIR_KEYWORDS	calcium binding	3	2.52101	0.266458	824, 6717, 10627	119	72	8445	2.95693	1	0.952395	98.0966
INTERPRO	IPR011992:EF-Hand type	4	3.36134	0.274906	824, 6717, 10627, 553115	115	124	7752	2.17447	1	0.996395	98.5741
INTERPRO	IPR018248:EF hand	3	2.52101	0.291563	6717, 10627, 553115	115	73	7752	2.77022	1	0.996577	98.9513
SP_PIR_KEYWORDS	calcium	5	4.20168	0.753114	824, 6717, 10627, 7171, 553115	119	363	8445	0.977498	1	0.997133	100
GOTERM_MF_FAT	GO:0005509~calcium ion binding	6	5.04202	0.754243	824, 6717, 10627, 7171, 553115, 54749	91	428	6200	0.95512	1	0.999864	100
Annotation Cluster 22	Enrichment Score: 0.697555174444611
Category	Term	Count	%	PValue	Genes	List Total	Pop Hits	Pop Total	Fold Enrichment	Bonferroni	Benjamini	FDR
GOTERM_BP_FAT	GO:0030030~cell projection organization	7	5.88235	0.0740225	822, 5108, 7168, 1191, 4627, 26227, 51474	97	201	6549	2.35128	1	0.883905	71.1719
GOTERM_BP_FAT	GO:0032989~cellular component morphogenesis	6	5.04202	0.209755	9181, 5108, 7168, 1191, 4627, 928	97	216	6549	1.87543	1	0.958608	97.7794
GOTERM_BP_FAT	GO:0000902~cell morphogenesis	4	3.36134	0.520307	9181, 5108, 1191, 4627	97	187	6549	1.44418	1	0.994829	99.9993
Annotation Cluster 23	Enrichment Score: 0.6624818948829407
Category	Term	Count	%	PValue	Genes	List Total	Pop Hits	Pop Total	Fold Enrichment	Bonferroni	Benjamini	FDR
GOTERM_BP_FAT	GO:0051051~negative regulation of transport	6	5.04202	0.00874224	2771, 55075, 3060, 2316, 23327, 3625	97	87	6549	4.65624	0.999974	0.617522	13.239
GOTERM_BP_FAT	GO:0043271~negative regulation of ion transport	3	2.52101	0.0223273	2771, 3060, 23327	97	16	6549	12.6591	1	0.693345	30.5942
GOTERM_BP_FAT	GO:0010959~regulation of metal ion transport	4	3.36134	0.029421	2771, 3060, 23327, 857	97	46	6549	5.87091	1	0.735957	38.3056
GOTERM_BP_FAT	GO:0051050~positive regulation of transport	6	5.04202	0.0371156	55075, 3060, 2316, 23327, 857, 3625	97	126	6549	3.21502	1	0.780832	45.7576
GOTERM_BP_FAT	GO:0043269~regulation of ion transport	4	3.36134	0.0528029	2771, 3060, 23327, 857	97	58	6549	4.65624	1	0.837048	58.4127
GOTERM_BP_FAT	GO:0042391~regulation of membrane potential	4	3.36134	0.0855742	6717, 3060, 928, 857	97	71	6549	3.80369	1	0.884001	76.469
GOTERM_CC_FAT	GO:0031982~vesicle	10	8.40336	0.196951	6717, 163, 822, 3060, 1191, 4673, 57127, 928, 57584, 857	92	439	6172	1.52818	1	0.888462	93.741
GOTERM_BP_FAT	GO:0006873~cellular ion homeostasis	5	4.20168	0.320301	6717, 3060, 23327, 928, 857	97	195	6549	1.73117	1	0.978547	99.8059
GOTERM_BP_FAT	GO:0030003~cellular cation homeostasis	4	3.36134	0.325539	6717, 3060, 23327, 857	97	137	6549	1.97125	1	0.979488	99.8287
GOTERM_BP_FAT	GO:0055082~cellular chemical homeostasis	5	4.20168	0.337053	6717, 3060, 23327, 928, 857	97	200	6549	1.68789	1	0.980315	99.8704
GOTERM_BP_FAT	GO:0019725~cellular homeostasis	6	5.04202	0.35377	6717, 3060, 23327, 928, 857, 2745	97	267	6549	1.5172	1	0.980791	99.9142
GOTERM_BP_FAT	GO:0060341~regulation of cellular localization	4	3.36134	0.353798	55075, 3060, 2316, 3625	97	144	6549	1.87543	1	0.980224	99.9143
GOTERM_BP_FAT	GO:0055080~cation homeostasis	4	3.36134	0.39392	6717, 3060, 23327, 857	97	154	6549	1.75365	1	0.986518	99.9696
GOTERM_BP_FAT	GO:0050801~ion homeostasis	5	4.20168	0.394146	6717, 3060, 23327, 928, 857	97	217	6549	1.55566	1	0.986144	99.9698
GOTERM_BP_FAT	GO:0006875~cellular metal ion homeostasis	3	2.52101	0.41782	3060, 23327, 857	97	97	6549	2.08811	1	0.988096	99.9841
GOTERM_BP_FAT	GO:0055065~metal ion homeostasis	3	2.52101	0.443063	3060, 23327, 857	97	102	6549	1.98575	1	0.989082	99.9923
GOTERM_BP_FAT	GO:0030005~cellular di-, tri-valent inorganic cation homeostasis	3	2.52101	0.515015	6717, 3060, 857	97	117	6549	1.73117	1	0.994577	99.9992
GOTERM_BP_FAT	GO:0006812~cation transport	5	4.20168	0.545582	6717, 57127, 23327, 857, 79041	97	264	6549	1.2787	1	0.995999	99.9997
GOTERM_BP_FAT	GO:0055066~di-, tri-valent inorganic cation homeostasis	3	2.52101	0.54647	6717, 3060, 857	97	124	6549	1.63344	1	0.995925	99.9997
GOTERM_BP_FAT	GO:0048878~chemical homeostasis	5	4.20168	0.584148	6717, 3060, 23327, 928, 857	97	277	6549	1.21869	1	0.997265	99.9999
GOTERM_BP_FAT	GO:0030001~metal ion transport	4	3.36134	0.602932	6717, 23327, 857, 79041	97	211	6549	1.27991	1	0.99778	100
GOTERM_BP_FAT	GO:0042592~homeostatic process	7	5.88235	0.605269	6717, 1435, 3060, 23327, 928, 857, 2745	97	428	6549	1.10422	1	0.997718	100
GOTERM_BP_FAT	GO:0006811~ion transport	5	4.20168	0.737981	6717, 57127, 23327, 857, 79041	97	338	6549	0.998749	1	0.999631	100
Annotation Cluster 24	Enrichment Score: 0.6609529945658694
Category	Term	Count	%	PValue	Genes	List Total	Pop Hits	Pop Total	Fold Enrichment	Bonferroni	Benjamini	FDR
GOTERM_CC_FAT	GO:0005874~microtubule	10	8.40336	0.000301811	9181, 7846, 347733, 84790, 3796, 55605, 27436, 7461, 983, 3799	92	148	6172	4.5329	0.0614224	0.0157225	0.38064
GOTERM_BP_FAT	GO:0000279~M phase	5	4.20168	0.254415	9181, 4627, 347733, 27436, 983	97	175	6549	1.92901	1	0.971858	99.1333
GOTERM_BP_FAT	GO:0000280~nuclear division	4	3.36134	0.293276	9181, 347733, 27436, 983	97	129	6549	2.0935	1	0.980604	99.6354
GOTERM_BP_FAT	GO:0007067~mitosis	4	3.36134	0.293276	9181, 347733, 27436, 983	97	129	6549	2.0935	1	0.980604	99.6354
GOTERM_BP_FAT	GO:0000087~M phase of mitotic cell cycle	4	3.36134	0.297299	9181, 347733, 27436, 983	97	130	6549	2.0774	1	0.980422	99.6675
GOTERM_BP_FAT	GO:0048285~organelle fission	4	3.36134	0.313424	9181, 347733, 27436, 983	97	134	6549	2.01539	1	0.977733	99.7716
GOTERM_BP_FAT	GO:0022402~cell cycle process	7	5.88235	0.386337	9181, 4627, 347733, 26227, 5371, 27436, 983	97	342	6549	1.3819	1	0.985443	99.9628
GOTERM_CC_FAT	GO:0005819~spindle	3	2.52101	0.410468	9181, 4627, 983	92	95	6172	2.11854	1	0.95802	99.8739
GOTERM_BP_FAT	GO:0022403~cell cycle phase	5	4.20168	0.443995	9181, 4627, 347733, 27436, 983	97	232	6549	1.45507	1	0.988907	99.9925
GOTERM_BP_FAT	GO:0007049~cell cycle	8	6.72269	0.537372	9181, 4627, 347733, 26227, 5371, 402, 27436, 983	97	469	6549	1.15165	1	0.995743	99.9996
GOTERM_BP_FAT	GO:0000278~mitotic cell cycle	4	3.36134	0.681433	9181, 347733, 27436, 983	97	237	6549	1.1395	1	0.998978	100
GOTERM_BP_FAT	GO:0051301~cell division	3	2.52101	0.738051	9181, 4627, 983	97	177	6549	1.14433	1	0.999617	100
Annotation Cluster 25	Enrichment Score: 0.6563995832857369
Category	Term	Count	%	PValue	Genes	List Total	Pop Hits	Pop Total	Fold Enrichment	Bonferroni	Benjamini	FDR
GOTERM_BP_FAT	GO:0010647~positive regulation of cell communication	7	5.88235	0.0811779	3956, 1435, 5396, 3060, 10174, 2316, 857	97	206	6549	2.29421	1	0.880403	74.5711
GOTERM_BP_FAT	GO:0009967~positive regulation of signal transduction	6	5.04202	0.13682	3956, 1435, 5396, 10174, 2316, 857	97	186	6549	2.17792	1	0.931713	90.7414
GOTERM_BP_FAT	GO:0010627~regulation of protein kinase cascade	4	3.36134	0.429505	3956, 10174, 2316, 857	97	163	6549	1.65682	1	0.988611	99.9886
GOTERM_BP_FAT	GO:0010740~positive regulation of protein kinase cascade	3	2.52101	0.496417	3956, 10174, 2316	97	113	6549	1.79245	1	0.993301	99.9985
Annotation Cluster 26	Enrichment Score: 0.6500110176858517
Category	Term	Count	%	PValue	Genes	List Total	Pop Hits	Pop Total	Fold Enrichment	Bonferroni	Benjamini	FDR
GOTERM_BP_FAT	GO:0030097~hemopoiesis	5	4.20168	0.1358	10014, 1397, 1435, 4627, 5371	97	135	6549	2.50057	1	0.933026	90.5629
GOTERM_BP_FAT	GO:0048534~hemopoietic or lymphoid organ development	5	4.20168	0.154664	10014, 1397, 1435, 4627, 5371	97	142	6549	2.37731	1	0.939776	93.3958
GOTERM_MF_FAT	GO:0042803~protein homodimerization activity	6	5.04202	0.174042	3956, 1435, 4627, 2316, 5371, 3625	91	204	6200	2.00388	1	0.962805	91.5389
GOTERM_BP_FAT	GO:0002520~immune system development	5	4.20168	0.177359	10014, 1397, 1435, 4627, 5371	97	150	6549	2.25052	1	0.952773	95.7473
GOTERM_BP_FAT	GO:0030099~myeloid cell differentiation	3	2.52101	0.181985	1435, 4627, 5371	97	53	6549	3.82163	1	0.951353	96.118
GOTERM_BP_FAT	GO:0001775~cell activation	5	4.20168	0.189116	10014, 1435, 942, 4627, 928	97	154	6549	2.19206	1	0.952208	96.6306
GOTERM_MF_FAT	GO:0046983~protein dimerization activity	8	6.72269	0.199776	64121, 3956, 1435, 4627, 2316, 553115, 5371, 3625	91	329	6200	1.6567	1	0.949405	94.3781
UP_TISSUE	Spleen	9	7.56303	0.218456	64780, 3956, 2014, 4627, 2316, 553115, 5371, 81887, 2745	116	415	8283	1.54855	1	0.789178	94.0956
GOTERM_BP_FAT	GO:0002521~leukocyte differentiation	3	2.52101	0.301193	10014, 1435, 4627	97	75	6549	2.70062	1	0.9795	99.6961
GOTERM_BP_FAT	GO:0045321~leukocyte activation	4	3.36134	0.309389	10014, 1435, 942, 4627	97	133	6549	2.03054	1	0.978554	99.7489
GOTERM_MF_FAT	GO:0042802~identical protein binding	8	6.72269	0.373317	3956, 1435, 26578, 4627, 2316, 857, 5371, 3625	91	405	6200	1.34581	1	0.990837	99.7608
GOTERM_BP_FAT	GO:0046649~lymphocyte activation	3	2.52101	0.467703	10014, 942, 4627	97	107	6549	1.89296	1	0.991044	99.9963
Annotation Cluster 27	Enrichment Score: 0.6425852245161392
Category	Term	Count	%	PValue	Genes	List Total	Pop Hits	Pop Total	Fold Enrichment	Bonferroni	Benjamini	FDR
GOTERM_BP_FAT	GO:0042770~DNA damage response, signal transduction	4	3.36134	0.036439	55075, 5371, 7508, 983	97	50	6549	5.40124	1	0.785854	45.1379
GOTERM_BP_FAT	GO:0000077~DNA damage checkpoint	3	2.52101	0.070961	5371, 7508, 983	97	30	6549	6.75155	1	0.878762	69.5911
GOTERM_BP_FAT	GO:0031570~DNA integrity checkpoint	3	2.52101	0.0837621	5371, 7508, 983	97	33	6549	6.13777	1	0.883456	75.7034
GOTERM_BP_FAT	GO:0009411~response to UV	3	2.52101	0.101812	55075, 5371, 7508	97	37	6549	5.47423	1	0.89649	82.3889
GOTERM_BP_FAT	GO:0009314~response to radiation	4	3.36134	0.176929	55075, 857, 5371, 7508	97	99	6549	2.7279	1	0.954255	95.7112
GOTERM_BP_FAT	GO:0009628~response to abiotic stimulus	6	5.04202	0.179112	55075, 857, 5371, 7078, 56925, 7508	97	204	6549	1.98575	1	0.950609	95.8915
GOTERM_BP_FAT	GO:0052547~regulation of peptidase activity	3	2.52101	0.192603	55075, 857, 5371	97	55	6549	3.68266	1	0.953414	96.8574
GOTERM_BP_FAT	GO:0000075~cell cycle checkpoint	3	2.52101	0.214065	5371, 7508, 983	97	59	6549	3.43299	1	0.960143	97.9674
GOTERM_BP_FAT	GO:0009416~response to light stimulus	3	2.52101	0.252091	55075, 5371, 7508	97	66	6549	3.06888	1	0.971807	99.0886
GOTERM_BP_FAT	GO:0033554~cellular response to stress	6	5.04202	0.554531	7168, 55075, 857, 5371, 7508, 983	97	337	6549	1.20206	1	0.996164	99.9998
GOTERM_BP_FAT	GO:0051726~regulation of cell cycle	4	3.36134	0.60617	5371, 7508, 10987, 983	97	212	6549	1.27388	1	0.997676	100
GOTERM_BP_FAT	GO:0006974~response to DNA damage stimulus	4	3.36134	0.628351	55075, 5371, 7508, 983	97	219	6549	1.23316	1	0.997919	100
GOTERM_CC_FAT	GO:0005626~insoluble fraction	7	5.88235	0.702046	824, 2771, 55075, 800, 857, 5371, 3895	92	470	6172	0.999167	1	0.993814	100
GOTERM_CC_FAT	GO:0005654~nucleoplasm	6	5.04202	0.936689	23524, 10014, 5371, 10445, 7508, 983	92	577	6172	0.697611	1	0.999946	100
Annotation Cluster 28	Enrichment Score: 0.6388923717406745
Category	Term	Count	%	PValue	Genes	List Total	Pop Hits	Pop Total	Fold Enrichment	Bonferroni	Benjamini	FDR
GOTERM_MF_FAT	GO:0030695~GTPase regulator activity	6	5.04202	0.196419	9181, 64744, 5998, 57584, 402, 50807	91	213	6200	1.91921	1	0.954954	94.0658
GOTERM_MF_FAT	GO:0060589~nucleoside-triphosphatase regulator activity	6	5.04202	0.214492	9181, 64744, 5998, 57584, 402, 50807	91	220	6200	1.85814	1	0.953219	95.5765
GOTERM_MF_FAT	GO:0005096~GTPase activator activity	4	3.36134	0.217857	64744, 5998, 57584, 50807	91	111	6200	2.4552	1	0.948228	95.8151
GOTERM_MF_FAT	GO:0008047~enzyme activator activity	5	4.20168	0.229944	64744, 5998, 57584, 857, 50807	91	169	6200	2.01574	1	0.950145	96.5776
SP_PIR_KEYWORDS	GTPase activation	3	2.52101	0.302796	64744, 57584, 50807	119	79	8445	2.69493	1	0.95115	99.0059
Annotation Cluster 29	Enrichment Score: 0.6224000917426223
Category	Term	Count	%	PValue	Genes	List Total	Pop Hits	Pop Total	Fold Enrichment	Bonferroni	Benjamini	FDR
GOTERM_BP_FAT	GO:0007584~response to nutrient	4	3.36134	0.187967	2771, 857, 7078, 23564	97	102	6549	2.64767	1	0.952981	96.5526
GOTERM_BP_FAT	GO:0009991~response to extracellular stimulus	5	4.20168	0.204156	2771, 857, 7078, 6423, 23564	97	159	6549	2.12313	1	0.959112	97.5108
GOTERM_BP_FAT	GO:0031667~response to nutrient levels	4	3.36134	0.353798	2771, 857, 7078, 23564	97	144	6549	1.87543	1	0.980224	99.9143
Annotation Cluster 30	Enrichment Score: 0.5956128087608197
Category	Term	Count	%	PValue	Genes	List Total	Pop Hits	Pop Total	Fold Enrichment	Bonferroni	Benjamini	FDR
GOTERM_BP_FAT	GO:0030334~regulation of cell migration	4	3.36134	0.222071	10014, 57142, 1435, 7168	97	111	6549	2.43299	1	0.959904	98.2776
GOTERM_BP_FAT	GO:0040012~regulation of locomotion	4	3.36134	0.26924	10014, 57142, 1435, 7168	97	123	6549	2.19562	1	0.975339	99.3737
GOTERM_BP_FAT	GO:0051270~regulation of cell motion	4	3.36134	0.273231	10014, 57142, 1435, 7168	97	124	6549	2.17792	1	0.976022	99.4268
Annotation Cluster 31	Enrichment Score: 0.5447805313626972
Category	Term	Count	%	PValue	Genes	List Total	Pop Hits	Pop Total	Fold Enrichment	Bonferroni	Benjamini	FDR
GOTERM_MF_FAT	GO:0030695~GTPase regulator activity	6	5.04202	0.196419	9181, 64744, 5998, 57584, 402, 50807	91	213	6200	1.91921	1	0.954954	94.0658
GOTERM_MF_FAT	GO:0060589~nucleoside-triphosphatase regulator activity	6	5.04202	0.214492	9181, 64744, 5998, 57584, 402, 50807	91	220	6200	1.85814	1	0.953219	95.5765
GOTERM_BP_FAT	GO:0046578~regulation of Ras protein signal transduction	4	3.36134	0.218218	9181, 1435, 64744, 50807	97	110	6549	2.45511	1	0.960114	98.1343
GOTERM_BP_FAT	GO:0051056~regulation of small GTPase mediated signal transduction	4	3.36134	0.329578	9181, 1435, 64744, 50807	97	138	6549	1.95697	1	0.980039	99.8446
GOTERM_MF_FAT	GO:0005083~small GTPase regulator activity	3	2.52101	0.62324	9181, 64744, 50807	91	144	6200	1.41941	1	0.998795	99.9997
Annotation Cluster 32	Enrichment Score: 0.537827582917472
Category	Term	Count	%	PValue	Genes	List Total	Pop Hits	Pop Total	Fold Enrichment	Bonferroni	Benjamini	FDR
UP_SEQ_FEATURE	cross-link:Glycyl lysine isopeptide (Lys-Gly) (interchain with G-Cter in ubiquitin)	4	3.36134	0.250674	7168, 402, 983, 3895	119	124	8439	2.28761	1	0.999908	98.3351
SP_PIR_KEYWORDS	ubl conjugation	8	6.72269	0.287658	10014, 7071, 7168, 942, 5371, 402, 983, 3895	119	383	8445	1.48233	1	0.958997	98.6917
SP_PIR_KEYWORDS	isopeptide bond	5	4.20168	0.337701	7168, 5371, 402, 983, 3895	119	210	8445	1.68968	1	0.940503	99.4845
Annotation Cluster 33	Enrichment Score: 0.5137845752309961
Category	Term	Count	%	PValue	Genes	List Total	Pop Hits	Pop Total	Fold Enrichment	Bonferroni	Benjamini	FDR
GOTERM_CC_FAT	GO:0030017~sarcomere	3	2.52101	0.265166	6717, 7168, 7171	92	68	6172	2.95972	1	0.92484	97.961
GOTERM_CC_FAT	GO:0030016~myofibril	3	2.52101	0.303578	6717, 7168, 7171	92	75	6172	2.68348	1	0.933696	98.9652
GOTERM_CC_FAT	GO:0044449~contractile fiber part	3	2.52101	0.325398	6717, 7168, 7171	92	79	6172	2.54761	1	0.930508	99.3079
GOTERM_CC_FAT	GO:0043292~contractile fiber	3	2.52101	0.336246	6717, 7168, 7171	92	81	6172	2.4847	1	0.932092	99.4361
Annotation Cluster 34	Enrichment Score: 0.5106055744136256
Category	Term	Count	%	PValue	Genes	List Total	Pop Hits	Pop Total	Fold Enrichment	Bonferroni	Benjamini	FDR
GOTERM_BP_FAT	GO:0010959~regulation of metal ion transport	4	3.36134	0.029421	2771, 3060, 23327, 857	97	46	6549	5.87091	1	0.735957	38.3056
GOTERM_BP_FAT	GO:0043269~regulation of ion transport	4	3.36134	0.0528029	2771, 3060, 23327, 857	97	58	6549	4.65624	1	0.837048	58.4127
GOTERM_BP_FAT	GO:0044093~positive regulation of molecular function	10	8.40336	0.080304	10014, 2771, 1435, 7168, 55075, 3060, 800, 857, 5371, 983	97	360	6549	1.87543	1	0.882868	74.1771
GOTERM_BP_FAT	GO:0051924~regulation of calcium ion transport	3	2.52101	0.0926568	2771, 3060, 857	97	35	6549	5.78704	1	0.890176	79.2497
GOTERM_BP_FAT	GO:0043085~positive regulation of catalytic activity	8	6.72269	0.186221	2771, 1435, 7168, 55075, 3060, 857, 5371, 983	97	319	6549	1.69318	1	0.953253	96.4307
GOTERM_BP_FAT	GO:0043086~negative regulation of catalytic activity	5	4.20168	0.267384	2771, 5998, 831, 2316, 857	97	179	6549	1.88591	1	0.976389	99.3475
GOTERM_BP_FAT	GO:0010648~negative regulation of cell communication	4	3.36134	0.345731	2771, 5998, 3060, 857	97	142	6549	1.90184	1	0.980928	99.8952
GOTERM_BP_FAT	GO:0051240~positive regulation of multicellular organismal process	4	3.36134	0.373915	1435, 7168, 3060, 857	97	149	6549	1.8125	1	0.984165	99.9486
GOTERM_BP_FAT	GO:0045859~regulation of protein kinase activity	5	4.20168	0.377374	2771, 1435, 5998, 3060, 857	97	212	6549	1.59235	1	0.984455	99.953
GOTERM_BP_FAT	GO:0044092~negative regulation of molecular function	5	4.20168	0.394146	2771, 5998, 831, 2316, 857	97	217	6549	1.55566	1	0.986144	99.9698
GOTERM_BP_FAT	GO:0043549~regulation of kinase activity	5	4.20168	0.407521	2771, 1435, 5998, 3060, 857	97	221	6549	1.5275	1	0.987431	99.9789
GOTERM_BP_FAT	GO:0051338~regulation of transferase activity	5	4.20168	0.430795	2771, 1435, 5998, 3060, 857	97	228	6549	1.4806	1	0.98848	99.989
GOTERM_BP_FAT	GO:0051241~negative regulation of multicellular organismal process	3	2.52101	0.433035	2771, 3060, 857	97	100	6549	2.02546	1	0.988501	99.9897
GOTERM_BP_FAT	GO:0000165~MAPKKK cascade	3	2.52101	0.457922	2771, 5998, 857	97	105	6549	1.92901	1	0.990312	99.995
GOTERM_BP_FAT	GO:0045860~positive regulation of protein kinase activity	3	2.52101	0.593005	2771, 1435, 3060	97	135	6549	1.50034	1	0.997553	100
GOTERM_BP_FAT	GO:0042325~regulation of phosphorylation	5	4.20168	0.615304	2771, 1435, 5998, 3060, 857	97	288	6549	1.17214	1	0.997725	100
GOTERM_BP_FAT	GO:0033674~positive regulation of kinase activity	3	2.52101	0.616872	2771, 1435, 3060	97	141	6549	1.4365	1	0.997711	100
GOTERM_BP_FAT	GO:0051347~positive regulation of transferase activity	3	2.52101	0.635942	2771, 1435, 3060	97	146	6549	1.3873	1	0.998048	100
GOTERM_BP_FAT	GO:0051174~regulation of phosphorus metabolic process	5	4.20168	0.645012	2771, 1435, 5998, 3060, 857	97	299	6549	1.12902	1	0.998217	100
GOTERM_BP_FAT	GO:0019220~regulation of phosphate metabolic process	5	4.20168	0.645012	2771, 1435, 5998, 3060, 857	97	299	6549	1.12902	1	0.998217	100
GOTERM_BP_FAT	GO:0007243~protein kinase cascade	3	2.52101	0.82531	2771, 5998, 857	97	213	6549	0.950922	1	0.999896	100
Annotation Cluster 35	Enrichment Score: 0.4969521634633067
Category	Term	Count	%	PValue	Genes	List Total	Pop Hits	Pop Total	Fold Enrichment	Bonferroni	Benjamini	FDR
GOTERM_BP_FAT	GO:0051336~regulation of hydrolase activity	7	5.88235	0.0536808	64744, 7168, 55075, 3060, 857, 5371, 50807	97	185	6549	2.55464	1	0.833945	59.0317
GOTERM_BP_FAT	GO:0044093~positive regulation of molecular function	10	8.40336	0.080304	10014, 2771, 1435, 7168, 55075, 3060, 800, 857, 5371, 983	97	360	6549	1.87543	1	0.882868	74.1771
GOTERM_BP_FAT	GO:0051345~positive regulation of hydrolase activity	4	3.36134	0.166084	7168, 55075, 3060, 5371	97	96	6549	2.81314	1	0.945831	94.6999
GOTERM_BP_FAT	GO:0043085~positive regulation of catalytic activity	8	6.72269	0.186221	2771, 1435, 7168, 55075, 3060, 857, 5371, 983	97	319	6549	1.69318	1	0.953253	96.4307
GOTERM_BP_FAT	GO:0032270~positive regulation of cellular protein metabolic process	4	3.36134	0.417714	1435, 857, 5371, 983	97	160	6549	1.68789	1	0.988434	99.9841
GOTERM_BP_FAT	GO:0051247~positive regulation of protein metabolic process	4	3.36134	0.452833	1435, 857, 5371, 983	97	169	6549	1.598	1	0.989898	99.9942
GOTERM_BP_FAT	GO:0033554~cellular response to stress	6	5.04202	0.554531	7168, 55075, 857, 5371, 7508, 983	97	337	6549	1.20206	1	0.996164	99.9998
GOTERM_BP_FAT	GO:0031401~positive regulation of protein modification process	3	2.52101	0.576498	857, 5371, 983	97	131	6549	1.54616	1	0.997008	99.9999
GOTERM_BP_FAT	GO:0032268~regulation of cellular protein metabolic process	5	4.20168	0.699863	1435, 857, 5371, 7078, 983	97	321	6549	1.05164	1	0.999233	100
GOTERM_BP_FAT	GO:0010604~positive regulation of macromolecule metabolic process	7	5.88235	0.757188	10014, 1435, 942, 7533, 857, 5371, 983	97	503	6549	0.939579	1	0.999652	100
GOTERM_BP_FAT	GO:0031399~regulation of protein modification process	3	2.52101	0.799571	857, 5371, 983	97	201	6549	1.00769	1	0.999843	100
Annotation Cluster 36	Enrichment Score: 0.4726529509651859
Category	Term	Count	%	PValue	Genes	List Total	Pop Hits	Pop Total	Fold Enrichment	Bonferroni	Benjamini	FDR
GOTERM_BP_FAT	GO:0001503~ossification	3	2.52101	0.2903	7071, 26578, 3339	97	73	6549	2.77461	1	0.980397	99.6097
GOTERM_BP_FAT	GO:0060348~bone development	3	2.52101	0.31206	7071, 26578, 3339	97	77	6549	2.63047	1	0.977998	99.7641
GOTERM_BP_FAT	GO:0001501~skeletal system development	4	3.36134	0.421653	7071, 5396, 26578, 3339	97	161	6549	1.6774	1	0.988023	99.9858
Annotation Cluster 37	Enrichment Score: 0.45345269872515914
Category	Term	Count	%	PValue	Genes	List Total	Pop Hits	Pop Total	Fold Enrichment	Bonferroni	Benjamini	FDR
GOTERM_MF_FAT	GO:0030695~GTPase regulator activity	6	5.04202	0.196419	9181, 64744, 5998, 57584, 402, 50807	91	213	6200	1.91921	1	0.954954	94.0658
INTERPRO	IPR011993:Pleckstrin homology-type	5	4.20168	0.209057	4478, 9181, 57584, 2036, 50807	115	160	7752	2.10652	1	0.990819	95.4997
GOTERM_MF_FAT	GO:0060589~nucleoside-triphosphatase regulator activity	6	5.04202	0.214492	9181, 64744, 5998, 57584, 402, 50807	91	220	6200	1.85814	1	0.953219	95.5765
UP_SEQ_FEATURE	domain:PH	3	2.52101	0.511694	9181, 57584, 50807	119	122	8439	1.74384	1	0.999994	99.9962
INTERPRO	IPR001849:Pleckstrin homology	3	2.52101	0.637187	9181, 57584, 50807	115	146	7752	1.38511	1	0.999999	99.9998
SMART	SM00233:PH	3	2.52101	0.662443	9181, 57584, 50807	64	146	4108	1.31892	1	0.999935	99.9987
Annotation Cluster 38	Enrichment Score: 0.4171069150682055
Category	Term	Count	%	PValue	Genes	List Total	Pop Hits	Pop Total	Fold Enrichment	Bonferroni	Benjamini	FDR
GOTERM_BP_FAT	GO:0009628~response to abiotic stimulus	6	5.04202	0.179112	55075, 857, 5371, 7078, 56925, 7508	97	204	6549	1.98575	1	0.950609	95.8915
GOTERM_BP_FAT	GO:0051248~negative regulation of protein metabolic process	4	3.36134	0.301326	2316, 857, 5371, 7078	97	131	6549	2.06154	1	0.978819	99.697
GOTERM_BP_FAT	GO:0032269~negative regulation of cellular protein metabolic process	3	2.52101	0.568066	857, 5371, 7078	97	129	6549	1.57013	1	0.996689	99.9999
GOTERM_BP_FAT	GO:0032268~regulation of cellular protein metabolic process	5	4.20168	0.699863	1435, 857, 5371, 7078, 983	97	321	6549	1.05164	1	0.999233	100
Annotation Cluster 39	Enrichment Score: 0.4154189995292105
Category	Term	Count	%	PValue	Genes	List Total	Pop Hits	Pop Total	Fold Enrichment	Bonferroni	Benjamini	FDR
GOTERM_CC_FAT	GO:0044421~extracellular region part	10	8.40336	0.303522	84695, 3956, 1435, 1191, 84171, 10404, 3339, 7078, 135228, 8076	92	494	6172	1.35804	1	0.939998	98.9642
SP_PIR_KEYWORDS	extracellular matrix	4	3.36134	0.315079	3956, 3339, 7078, 8076	119	141	8445	2.01323	1	0.95286	99.208
GOTERM_CC_FAT	GO:0044420~extracellular matrix part	3	2.52101	0.319957	3339, 7078, 8076	92	78	6172	2.58027	1	0.938718	99.2339
GOTERM_CC_FAT	GO:0005578~proteinaceous extracellular matrix	4	3.36134	0.494845	3956, 3339, 7078, 8076	92	179	6172	1.49915	1	0.979264	99.9821
GOTERM_CC_FAT	GO:0031012~extracellular matrix	4	3.36134	0.553013	3956, 3339, 7078, 8076	92	195	6172	1.37614	1	0.982157	99.9962
Annotation Cluster 40	Enrichment Score: 0.41118141189103974
Category	Term	Count	%	PValue	Genes	List Total	Pop Hits	Pop Total	Fold Enrichment	Bonferroni	Benjamini	FDR
UP_SEQ_FEATURE	repeat:ANK 1	3	2.52101	0.369602	55075, 26578, 50807	119	92	8439	2.31248	1	0.999982	99.8567
UP_SEQ_FEATURE	repeat:ANK 2	3	2.52101	0.374628	55075, 26578, 50807	119	93	8439	2.28761	1	0.999975	99.8721
SP_PIR_KEYWORDS	ank repeat	3	2.52101	0.379303	55075, 26578, 50807	119	94	8445	2.26488	1	0.957999	99.7751
INTERPRO	IPR002110:Ankyrin	3	2.52101	0.398641	55075, 26578, 50807	115	93	7752	2.17447	1	0.999633	99.8799
SMART	SM00248:ANK	3	2.52101	0.419943	55075, 26578, 50807	64	93	4108	2.07056	1	0.998411	99.6492
Annotation Cluster 41	Enrichment Score: 0.40740670603762386
Category	Term	Count	%	PValue	Genes	List Total	Pop Hits	Pop Total	Fold Enrichment	Bonferroni	Benjamini	FDR
SP_PIR_KEYWORDS	lipoprotein	7	5.88235	0.299463	2771, 1191, 4673, 928, 857, 402, 135228	119	324	8445	1.53322	1	0.954665	98.9434
UP_SEQ_FEATURE	lipid moiety-binding region:S-palmitoyl cysteine	3	2.52101	0.409334	2771, 928, 857	119	100	8439	2.12748	1	0.999979	99.9431
SP_PIR_KEYWORDS	palmitate	3	2.52101	0.489056	2771, 928, 857	119	117	8445	1.81965	1	0.983453	99.9813
Annotation Cluster 42	Enrichment Score: 0.4067268509213163
Category	Term	Count	%	PValue	Genes	List Total	Pop Hits	Pop Total	Fold Enrichment	Bonferroni	Benjamini	FDR
GOTERM_BP_FAT	GO:0048514~blood vessel morphogenesis	4	3.36134	0.329578	57142, 5396, 4627, 857	97	138	6549	1.95697	1	0.980039	99.8446
GOTERM_BP_FAT	GO:0001568~blood vessel development	4	3.36134	0.421653	57142, 5396, 4627, 857	97	161	6549	1.6774	1	0.988023	99.9858
GOTERM_BP_FAT	GO:0001944~vasculature development	4	3.36134	0.433417	57142, 5396, 4627, 857	97	164	6549	1.64672	1	0.988225	99.9898
Annotation Cluster 43	Enrichment Score: 0.39980782041662954
Category	Term	Count	%	PValue	Genes	List Total	Pop Hits	Pop Total	Fold Enrichment	Bonferroni	Benjamini	FDR
GOTERM_BP_FAT	GO:0008361~regulation of cell size	5	4.20168	0.146459	64121, 57142, 2014, 10493, 5371	97	139	6549	2.42861	1	0.934377	92.2792
GOTERM_BP_FAT	GO:0009628~response to abiotic stimulus	6	5.04202	0.179112	55075, 857, 5371, 7078, 56925, 7508	97	204	6549	1.98575	1	0.950609	95.8915
GOTERM_BP_FAT	GO:0042981~regulation of apoptosis	10	8.40336	0.295832	9181, 7071, 57142, 3956, 55075, 1191, 5371, 7078, 23564, 983	97	493	6549	1.36948	1	0.98068	99.6561
GOTERM_BP_FAT	GO:0043067~regulation of programmed cell death	10	8.40336	0.301974	9181, 7071, 57142, 3956, 55075, 1191, 5371, 7078, 23564, 983	97	496	6549	1.3612	1	0.978299	99.7015
GOTERM_BP_FAT	GO:0010941~regulation of cell death	10	8.40336	0.308149	9181, 7071, 57142, 3956, 55075, 1191, 5371, 7078, 23564, 983	97	499	6549	1.35302	1	0.978865	99.7415
GOTERM_BP_FAT	GO:0006917~induction of apoptosis	5	4.20168	0.310284	9181, 7071, 55075, 5371, 7078	97	192	6549	1.75822	1	0.978132	99.7541
GOTERM_BP_FAT	GO:0012502~induction of programmed cell death	5	4.20168	0.31362	9181, 7071, 55075, 5371, 7078	97	193	6549	1.74911	1	0.977081	99.7726
GOTERM_BP_FAT	GO:0043065~positive regulation of apoptosis	5	4.20168	0.542542	9181, 7071, 55075, 5371, 7078	97	263	6549	1.28356	1	0.99594	99.9997
GOTERM_BP_FAT	GO:0043068~positive regulation of programmed cell death	5	4.20168	0.548612	9181, 7071, 55075, 5371, 7078	97	265	6549	1.27388	1	0.99593	99.9997
GOTERM_BP_FAT	GO:0010942~positive regulation of cell death	5	4.20168	0.554641	9181, 7071, 55075, 5371, 7078	97	267	6549	1.26433	1	0.996048	99.9998
GOTERM_BP_FAT	GO:0006915~apoptosis	6	5.04202	0.611726	64121, 9181, 57142, 3956, 1191, 5371	97	359	6549	1.12839	1	0.997737	100
GOTERM_BP_FAT	GO:0012501~programmed cell death	6	5.04202	0.626593	64121, 9181, 57142, 3956, 1191, 5371	97	365	6549	1.10984	1	0.997924	100
GOTERM_BP_FAT	GO:0008219~cell death	6	5.04202	0.752071	64121, 9181, 57142, 3956, 1191, 5371	97	423	6549	0.957666	1	0.999676	100
GOTERM_BP_FAT	GO:0016265~death	6	5.04202	0.755788	64121, 9181, 57142, 3956, 1191, 5371	97	425	6549	0.953159	1	0.999654	100
Annotation Cluster 44	Enrichment Score: 0.3845827766692822
Category	Term	Count	%	PValue	Genes	List Total	Pop Hits	Pop Total	Fold Enrichment	Bonferroni	Benjamini	FDR
GOTERM_BP_FAT	GO:0031327~negative regulation of cellular biosynthetic process	9	7.56303	0.0801398	10014, 7071, 3060, 10174, 7753, 3281, 857, 5371, 3625	97	307	6549	1.97928	1	0.88768	74.1024
GOTERM_BP_FAT	GO:0009890~negative regulation of biosynthetic process	9	7.56303	0.0898627	10014, 7071, 3060, 10174, 7753, 3281, 857, 5371, 3625	97	315	6549	1.92901	1	0.886977	78.1918
GOTERM_BP_FAT	GO:0010605~negative regulation of macromolecule metabolic process	11	9.2437	0.0986417	10014, 7071, 3060, 10174, 7753, 2316, 3281, 857, 5371, 7078, 3625	97	431	6549	1.72313	1	0.892775	81.356
GOTERM_BP_FAT	GO:0051172~negative regulation of nitrogen compound metabolic process	8	6.72269	0.120535	10014, 7071, 3060, 10174, 7753, 3281, 857, 5371	97	283	6549	1.90856	1	0.92075	87.4737
GOTERM_BP_FAT	GO:0000122~negative regulation of transcription from RNA polymerase II promoter	5	4.20168	0.138434	10014, 7071, 10174, 7753, 3281	97	136	6549	2.48219	1	0.931273	91.0175
GOTERM_BP_FAT	GO:0010558~negative regulation of macromolecule biosynthetic process	8	6.72269	0.151668	10014, 7071, 3060, 10174, 7753, 3281, 5371, 3625	97	301	6549	1.79443	1	0.938534	93.007
GOTERM_MF_FAT	GO:0008134~transcription factor binding	8	6.72269	0.179728	10014, 5396, 10174, 2316, 3281, 5371, 23564, 10987	91	319	6200	1.70864	1	0.949419	92.2611
GOTERM_BP_FAT	GO:0045934~negative regulation of nucleobase, nucleoside, nucleotide and nucleic acid metabolic process	7	5.88235	0.224687	10014, 7071, 3060, 10174, 7753, 3281, 5371	97	279	6549	1.69394	1	0.960257	98.3689
GOTERM_BP_FAT	GO:0045892~negative regulation of transcription, DNA-dependent	5	4.20168	0.287062	10014, 7071, 10174, 7753, 3281	97	185	6549	1.82474	1	0.980103	99.5799
GOTERM_MF_FAT	GO:0016563~transcription activator activity	6	5.04202	0.291323	5396, 942, 7533, 5371, 10113, 10987	91	248	6200	1.64835	1	0.972901	98.8295
GOTERM_BP_FAT	GO:0016481~negative regulation of transcription	6	5.04202	0.298361	10014, 7071, 10174, 7753, 3281, 5371	97	248	6549	1.63344	1	0.980039	99.6756
GOTERM_BP_FAT	GO:0051253~negative regulation of RNA metabolic process	5	4.20168	0.300303	10014, 7071, 10174, 7753, 3281	97	189	6549	1.78612	1	0.979934	99.6898
SP_PIR_KEYWORDS	repressor	5	4.20168	0.328141	10014, 7071, 7753, 23152, 10659	119	207	8445	1.71416	1	0.950016	99.3808
GOTERM_BP_FAT	GO:0010629~negative regulation of gene expression	6	5.04202	0.386173	10014, 7071, 10174, 7753, 3281, 5371	97	278	6549	1.45717	1	0.985849	99.9627
GOTERM_MF_FAT	GO:0003712~transcription cofactor activity	5	4.20168	0.416923	10014, 5396, 3281, 5371, 10987	91	226	6200	1.50734	1	0.994484	99.9058
GOTERM_MF_FAT	GO:0030528~transcription regulator activity	12	10.084	0.457669	10014, 7071, 7913, 5396, 7753, 942, 11179, 3281, 7533, 5371, 10113, 10987	91	710	6200	1.15152	1	0.995753	99.963
UP_SEQ_FEATURE	zinc finger region:C2H2-type 2	3	2.52101	0.54598	7071, 7753, 11179	119	130	8439	1.63652	1	0.999997	99.9986
UP_SEQ_FEATURE	zinc finger region:C2H2-type 1	3	2.52101	0.570585	7071, 7753, 11179	119	136	8439	1.56432	1	0.999998	99.9994
GOTERM_MF_FAT	GO:0003713~transcription coactivator activity	3	2.52101	0.607782	5396, 5371, 10987	91	140	6200	1.45997	1	0.998685	99.9994
GOTERM_BP_FAT	GO:0006357~regulation of transcription from RNA polymerase II promoter	6	5.04202	0.684833	10014, 7071, 7913, 10174, 7753, 3281	97	390	6549	1.0387	1	0.999009	100
GOTERM_MF_FAT	GO:0016564~transcription repressor activity	3	2.52101	0.727517	10014, 3281, 5371	91	175	6200	1.16797	1	0.999834	100
SP_PIR_KEYWORDS	dna-binding	9	7.56303	0.750103	7071, 7913, 5396, 7753, 11179, 23152, 5371, 10113, 7508	119	684	8445	0.933768	1	0.997296	100
GOTERM_BP_FAT	GO:0051252~regulation of RNA metabolic process	10	8.40336	0.773283	10014, 7071, 7913, 5396, 10174, 7753, 11179, 3281, 10113, 4154	97	741	6549	0.91114	1	0.999744	100
INTERPRO	IPR007087:Zinc finger, C2H2-type	3	2.52101	0.788681	7071, 7753, 11179	115	196	7752	1.03177	1	1	100
INTERPRO	IPR015880:Zinc finger, C2H2-like	3	2.52101	0.798025	7071, 7753, 11179	115	200	7752	1.01113	1	1	100
SMART	SM00355:ZnF_C2H2	3	2.52101	0.820199	7071, 7753, 11179	64	200	4108	0.962812	1	0.999999	100
GOTERM_BP_FAT	GO:0006355~regulation of transcription, DNA-dependent	9	7.56303	0.833888	10014, 7071, 7913, 5396, 10174, 7753, 11179, 3281, 10113	97	712	6549	0.853426	1	0.99991	100
GOTERM_BP_FAT	GO:0045449~regulation of transcription	14	11.7647	0.861591	10174, 942, 7753, 2316, 3281, 23152, 5371, 10014, 7071, 7913, 5396, 11179, 7533, 10113	97	1123	6549	0.841689	1	0.999964	100
GOTERM_MF_FAT	GO:0003677~DNA binding	11	9.2437	0.884018	10014, 7071, 7913, 5396, 7753, 11179, 23152, 10493, 5371, 10113, 7508	91	927	6200	0.808469	1	0.999997	100
GOTERM_MF_FAT	GO:0003700~transcription factor activity	4	3.36134	0.940514	7071, 5396, 7753, 11179	91	406	6200	0.67125	1	1	100
GOTERM_BP_FAT	GO:0006350~transcription	9	7.56303	0.953521	64121, 10014, 7071, 7753, 11179, 23152, 5371, 10113, 10987	97	874	6549	0.695239	1	1	100
SP_PIR_KEYWORDS	transcription regulation	7	5.88235	0.978189	10014, 7071, 7753, 11179, 23152, 5371, 10113	119	823	8445	0.603602	1	0.999995	100
SP_PIR_KEYWORDS	Transcription	7	5.88235	0.983499	10014, 7071, 7753, 11179, 23152, 5371, 10113	119	852	8445	0.583057	1	0.999997	100
Annotation Cluster 45	Enrichment Score: 0.3774841897861401
Category	Term	Count	%	PValue	Genes	List Total	Pop Hits	Pop Total	Fold Enrichment	Bonferroni	Benjamini	FDR
GOTERM_CC_FAT	GO:0005576~extracellular region	17	14.2857	0.157088	84293, 1435, 55075, 1191, 84171, 10404, 3339, 2316, 3625, 54749, 6423, 8076, 10437, 84695, 3956, 135228, 7078	92	831	6172	1.37242	1	0.863815	88.4567
SP_PIR_KEYWORDS	Secreted	13	10.9244	0.255595	84293, 1435, 1191, 84171, 3339, 10404, 6423, 54749, 3625, 8076, 84695, 3956, 7078	119	690	8445	1.33705	1	0.951791	97.7031
GOTERM_CC_FAT	GO:0044421~extracellular region part	10	8.40336	0.303522	84695, 3956, 1435, 1191, 84171, 10404, 3339, 7078, 135228, 8076	92	494	6172	1.35804	1	0.939998	98.9642
SP_PIR_KEYWORDS	disulfide bond	18	15.1261	0.336036	1435, 1191, 942, 84171, 3339, 143502, 928, 961, 10544, 3625, 6423, 2745, 8076, 84695, 10437, 3060, 135228, 7078	119	1079	8445	1.18387	1	0.944551	99.4676
GOTERM_CC_FAT	GO:0005615~extracellular space	7	5.88235	0.405042	84695, 3956, 1435, 1191, 84171, 10404, 135228	92	347	6172	1.35334	1	0.959531	99.8585
UP_TISSUE	Plasma	4	3.36134	0.432597	1191, 10404, 3339, 135228	116	173	8283	1.65099	1	0.904144	99.8504
SP_PIR_KEYWORDS	signal	20	16.8067	0.497147	84293, 1435, 1191, 942, 84171, 10404, 3339, 961, 10544, 3625, 54749, 6423, 8076, 84695, 10437, 3060, 6383, 140606, 135228, 7078	119	1330	8445	1.06716	1	0.983237	99.9848
UP_SEQ_FEATURE	signal peptide	20	16.8067	0.498492	84293, 1435, 1191, 942, 84171, 10404, 3339, 961, 10544, 3625, 54749, 6423, 8076, 84695, 10437, 3060, 6383, 140606, 135228, 7078	119	1330	8439	1.06641	1	0.999994	99.9944
UP_SEQ_FEATURE	disulfide bond	15	12.605	0.589492	1435, 942, 1191, 84171, 3339, 143502, 961, 10544, 3625, 6423, 2745, 10437, 84695, 3060, 7078	119	1031	8439	1.03176	1	0.999998	99.9997
UP_SEQ_FEATURE	glycosylation site:N-linked (GlcNAc...)	20	16.8067	0.812306	1435, 1191, 942, 2014, 84171, 10404, 3339, 143502, 928, 961, 10544, 3625, 54749, 8076, 3895, 84695, 10437, 57127, 135228, 92745	119	1592	8439	0.890904	1	1	100
SP_PIR_KEYWORDS	glycoprotein	21	17.6471	0.826949	1435, 1191, 942, 2014, 84171, 10404, 143502, 3339, 928, 961, 10544, 3625, 54749, 8076, 3895, 84695, 10437, 6383, 57127, 135228, 92745	119	1687	8445	0.883399	1	0.998793	100
Annotation Cluster 46	Enrichment Score: 0.3735135969710788
Category	Term	Count	%	PValue	Genes	List Total	Pop Hits	Pop Total	Fold Enrichment	Bonferroni	Benjamini	FDR
GOTERM_CC_FAT	GO:0031982~vesicle	10	8.40336	0.196951	6717, 163, 822, 3060, 1191, 4673, 57127, 928, 57584, 857	92	439	6172	1.52818	1	0.888462	93.741
GOTERM_CC_FAT	GO:0031410~cytoplasmic vesicle	9	7.56303	0.269208	163, 822, 3060, 1191, 4673, 57127, 928, 57584, 857	92	416	6172	1.4514	1	0.92059	98.0982
GOTERM_CC_FAT	GO:0030141~secretory granule	3	2.52101	0.490124	3060, 1191, 928	92	111	6172	1.81316	1	0.980342	99.9799
GOTERM_CC_FAT	GO:0044433~cytoplasmic vesicle part	3	2.52101	0.545356	163, 1191, 928	92	123	6172	1.63627	1	0.982355	99.9953
GOTERM_CC_FAT	GO:0016023~cytoplasmic membrane-bounded vesicle	6	5.04202	0.617289	163, 822, 3060, 1191, 4673, 928	92	359	6172	1.12123	1	0.989787	99.9995
GOTERM_CC_FAT	GO:0031988~membrane-bounded vesicle	6	5.04202	0.656143	163, 822, 3060, 1191, 4673, 928	92	375	6172	1.07339	1	0.993138	99.9999
Annotation Cluster 47	Enrichment Score: 0.3256662038475261
Category	Term	Count	%	PValue	Genes	List Total	Pop Hits	Pop Total	Fold Enrichment	Bonferroni	Benjamini	FDR
GOTERM_BP_FAT	GO:0044093~positive regulation of molecular function	10	8.40336	0.080304	10014, 2771, 1435, 7168, 55075, 3060, 800, 857, 5371, 983	97	360	6549	1.87543	1	0.882868	74.1771
GOTERM_BP_FAT	GO:0001666~response to hypoxia	3	2.52101	0.462825	824, 857, 5371	97	106	6549	1.91082	1	0.990686	99.9957
GOTERM_BP_FAT	GO:0070482~response to oxygen levels	3	2.52101	0.486953	824, 857, 5371	97	111	6549	1.82474	1	0.99255	99.9979
GOTERM_CC_FAT	GO:0005625~soluble fraction	4	3.36134	0.553013	824, 55075, 7453, 857	92	195	6172	1.37614	1	0.982157	99.9962
GOTERM_CC_FAT	GO:0005626~insoluble fraction	7	5.88235	0.702046	824, 2771, 55075, 800, 857, 5371, 3895	92	470	6172	0.999167	1	0.993814	100
GOTERM_CC_FAT	GO:0000267~cell fraction	8	6.72269	0.824647	824, 2771, 55075, 800, 7453, 857, 5371, 3895	92	622	6172	0.862855	1	0.99899	100
GOTERM_CC_FAT	GO:0005624~membrane fraction	5	4.20168	0.906415	2771, 55075, 800, 857, 3895	92	449	6172	0.747071	1	0.999812	100
Annotation Cluster 48	Enrichment Score: 0.3023479335935926
Category	Term	Count	%	PValue	Genes	List Total	Pop Hits	Pop Total	Fold Enrichment	Bonferroni	Benjamini	FDR
GOTERM_BP_FAT	GO:0045597~positive regulation of cell differentiation	4	3.36134	0.349766	7071, 1435, 1191, 942	97	143	6549	1.88854	1	0.980859	99.9052
GOTERM_BP_FAT	GO:0051094~positive regulation of developmental process	4	3.36134	0.47198	7071, 1435, 1191, 942	97	174	6549	1.55208	1	0.991316	99.9967
GOTERM_BP_FAT	GO:0008283~cell proliferation	4	3.36134	0.750334	2771, 7071, 1435, 942	97	264	6549	1.02296	1	0.999688	100
Annotation Cluster 49	Enrichment Score: 0.3017217031942065
Category	Term	Count	%	PValue	Genes	List Total	Pop Hits	Pop Total	Fold Enrichment	Bonferroni	Benjamini	FDR
SP_PIR_KEYWORDS	zinc	16	13.4454	0.317202	64780, 64744, 7753, 10404, 55768, 5371, 1397, 9181, 7071, 11179, 9110, 7078, 9645, 50807, 51474, 4154	119	930	8445	1.22093	1	0.948876	99.2388
GOTERM_MF_FAT	GO:0008270~zinc ion binding	16	13.4454	0.425057	64780, 64744, 7753, 10404, 55768, 5371, 10493, 1397, 9181, 7071, 11179, 9110, 9645, 50807, 51474, 4154	91	962	6200	1.13317	1	0.994086	99.9214
GOTERM_MF_FAT	GO:0046872~metal ion binding	29	24.3697	0.478846	824, 7753, 84171, 10404, 55768, 5371, 79041, 84695, 11179, 4154, 64121, 6717, 64780, 64744, 10493, 54749, 1854, 10987, 25996, 1397, 9181, 7071, 10627, 9110, 7171, 553115, 9645, 50807, 51474	91	1883	6200	1.0493	1	0.996337	99.9779
GOTERM_MF_FAT	GO:0043169~cation binding	29	24.3697	0.509633	824, 7753, 84171, 10404, 55768, 5371, 79041, 84695, 11179, 4154, 64121, 6717, 64780, 64744, 10493, 54749, 1854, 10987, 25996, 1397, 9181, 7071, 10627, 9110, 7171, 553115, 9645, 50807, 51474	91	1906	6200	1.03663	1	0.99732	99.9899
SP_PIR_KEYWORDS	metal-binding	20	16.8067	0.531101	64780, 64744, 7753, 84171, 10404, 55768, 5371, 10987, 1397, 84695, 9181, 7071, 11179, 9110, 7171, 7078, 9645, 50807, 51474, 4154	119	1354	8445	1.04825	1	0.986145	99.9938
GOTERM_MF_FAT	GO:0043167~ion binding	29	24.3697	0.542871	824, 7753, 84171, 10404, 55768, 5371, 79041, 84695, 11179, 4154, 64121, 6717, 64780, 64744, 10493, 54749, 1854, 10987, 25996, 1397, 9181, 7071, 10627, 9110, 7171, 553115, 9645, 50807, 51474	91	1931	6200	1.02321	1	0.998142	99.9959
GOTERM_MF_FAT	GO:0046914~transition metal ion binding	19	15.9664	0.544129	64780, 64744, 7753, 84171, 10404, 55768, 10493, 5371, 25996, 1397, 84695, 9181, 7071, 11179, 9110, 9645, 50807, 51474, 4154	91	1241	6200	1.04311	1	0.997773	99.9961
SP_PIR_KEYWORDS	zinc-finger	9	7.56303	0.747161	9181, 7071, 64744, 7753, 11179, 9110, 5371, 50807, 4154	119	682	8445	0.936507	1	0.997461	100
Annotation Cluster 50	Enrichment Score: 0.29736375498483836
Category	Term	Count	%	PValue	Genes	List Total	Pop Hits	Pop Total	Fold Enrichment	Bonferroni	Benjamini	FDR
SP_PIR_KEYWORDS	sh3 domain	3	2.52101	0.484531	26578, 10174, 50807	119	116	8445	1.83534	1	0.984395	99.9791
INTERPRO	IPR001452:Src homology-3 domain	3	2.52101	0.502533	26578, 10174, 50807	115	114	7752	1.77391	1	0.999966	99.9902
SMART	SM00326:SH3	3	2.52101	0.52653	26578, 10174, 50807	64	114	4108	1.68914	1	0.999491	99.9574
Annotation Cluster 51	Enrichment Score: 0.29002915452632394
Category	Term	Count	%	PValue	Genes	List Total	Pop Hits	Pop Total	Fold Enrichment	Bonferroni	Benjamini	FDR
GOTERM_BP_FAT	GO:0007155~cell adhesion	7	5.88235	0.420919	4478, 10174, 4627, 3339, 928, 961, 54749	97	355	6549	1.33129	1	0.988255	99.9855
GOTERM_BP_FAT	GO:0022610~biological adhesion	7	5.88235	0.423574	4478, 10174, 4627, 3339, 928, 961, 54749	97	356	6549	1.32755	1	0.987989	99.9865
SP_PIR_KEYWORDS	cell adhesion	3	2.52101	0.756458	10174, 928, 961	119	193	8445	1.1031	1	0.996655	100
Annotation Cluster 52	Enrichment Score: 0.2307589489543384
Category	Term	Count	%	PValue	Genes	List Total	Pop Hits	Pop Total	Fold Enrichment	Bonferroni	Benjamini	FDR
GOTERM_BP_FAT	GO:0046907~intracellular transport	10	8.40336	0.267655	9181, 163, 7168, 4627, 2316, 7533, 10466, 5371, 10113, 3799	97	479	6549	1.40951	1	0.975605	99.3514
GOTERM_BP_FAT	GO:0008104~protein localization	10	8.40336	0.472269	9181, 163, 4627, 2316, 3339, 7533, 10466, 857, 5371, 10113	97	576	6549	1.17214	1	0.991096	99.9968
GOTERM_BP_FAT	GO:0045184~establishment of protein localization	8	6.72269	0.624077	9181, 163, 4627, 2316, 7533, 10466, 5371, 10113	97	508	6549	1.06324	1	0.997903	100
GOTERM_BP_FAT	GO:0034613~cellular protein localization	5	4.20168	0.642373	9181, 163, 2316, 7533, 5371	97	298	6549	1.13281	1	0.998194	100
GOTERM_BP_FAT	GO:0070727~cellular macromolecule localization	5	4.20168	0.647639	9181, 163, 2316, 7533, 5371	97	300	6549	1.12526	1	0.998241	100
GOTERM_MF_FAT	GO:0019899~enzyme binding	5	4.20168	0.748223	9181, 2316, 7533, 857, 5371	91	346	6200	0.984565	1	0.999875	100
GOTERM_BP_FAT	GO:0015031~protein transport	7	5.88235	0.755473	9181, 163, 4627, 7533, 10466, 5371, 10113	97	502	6549	0.941451	1	0.999664	100
GOTERM_BP_FAT	GO:0006886~intracellular protein transport	4	3.36134	0.768343	9181, 163, 7533, 5371	97	272	6549	0.992874	1	0.999723	100
Annotation Cluster 53	Enrichment Score: 0.15151214106244326
Category	Term	Count	%	PValue	Genes	List Total	Pop Hits	Pop Total	Fold Enrichment	Bonferroni	Benjamini	FDR
GOTERM_CC_FAT	GO:0005635~nuclear envelope	4	3.36134	0.324692	57142, 55075, 5371, 79041	92	136	6172	1.97315	1	0.935951	99.2987
GOTERM_CC_FAT	GO:0012505~endomembrane system	8	6.72269	0.607187	163, 57142, 55075, 928, 857, 5371, 79041, 3895	92	497	6172	1.07987	1	0.989574	99.9993
GOTERM_CC_FAT	GO:0031967~organelle envelope	4	3.36134	0.958472	57142, 55075, 5371, 79041	92	431	6172	0.622617	1	0.999985	100
GOTERM_CC_FAT	GO:0031975~envelope	4	3.36134	0.959432	57142, 55075, 5371, 79041	92	433	6172	0.619741	1	0.999984	100
GOTERM_CC_FAT	GO:0031090~organelle membrane	7	5.88235	0.963943	163, 57142, 928, 857, 5371, 79041, 3895	92	723	6172	0.649528	1	0.999987	100
Annotation Cluster 54	Enrichment Score: 0.14657750251146964
Category	Term	Count	%	PValue	Genes	List Total	Pop Hits	Pop Total	Fold Enrichment	Bonferroni	Benjamini	FDR
GOTERM_BP_FAT	GO:0010033~response to organic substance	8	6.72269	0.609141	10014, 7071, 7913, 857, 5371, 7078, 23564, 2783	97	501	6549	1.07809	1	0.997714	100
GOTERM_BP_FAT	GO:0009725~response to hormone stimulus	4	3.36134	0.748008	10014, 857, 7078, 2783	97	263	6549	1.02685	1	0.999683	100
GOTERM_BP_FAT	GO:0009719~response to endogenous stimulus	4	3.36134	0.79734	10014, 857, 7078, 2783	97	286	6549	0.944272	1	0.999839	100
Annotation Cluster 55	Enrichment Score: 0.1313986768088396
Category	Term	Count	%	PValue	Genes	List Total	Pop Hits	Pop Total	Fold Enrichment	Bonferroni	Benjamini	FDR
GOTERM_BP_FAT	GO:0007600~sensory perception	3	2.52101	0.664918	143502, 7078, 56925	97	154	6549	1.31524	1	0.99866	100
GOTERM_BP_FAT	GO:0050877~neurological system process	5	4.20168	0.754635	3060, 143502, 928, 7078, 56925	97	346	6549	0.975657	1	0.999683	100
GOTERM_BP_FAT	GO:0050890~cognition	3	2.52101	0.80408	143502, 7078, 56925	97	203	6549	0.997765	1	0.999849	100
Annotation Cluster 56	Enrichment Score: 0.13077518427373638
Category	Term	Count	%	PValue	Genes	List Total	Pop Hits	Pop Total	Fold Enrichment	Bonferroni	Benjamini	FDR
UP_SEQ_FEATURE	topological domain:Lumenal	5	4.20168	0.486222	57142, 1435, 10113, 79041, 3895	119	257	8439	1.37969	1	0.999994	99.9921
GOTERM_CC_FAT	GO:0012505~endomembrane system	8	6.72269	0.607187	163, 57142, 55075, 928, 857, 5371, 79041, 3895	92	497	6172	1.07987	1	0.989574	99.9993
GOTERM_CC_FAT	GO:0005789~endoplasmic reticulum membrane	3	2.52101	0.688738	57142, 79041, 3895	92	160	6172	1.25788	1	0.993275	100
GOTERM_CC_FAT	GO:0042175~nuclear envelope-endoplasmic reticulum network	3	2.52101	0.717528	57142, 79041, 3895	92	169	6172	1.19089	1	0.994513	100
GOTERM_CC_FAT	GO:0044432~endoplasmic reticulum part	3	2.52101	0.841598	57142, 79041, 3895	92	220	6172	0.914822	1	0.99912	100
SP_PIR_KEYWORDS	endoplasmic reticulum	5	4.20168	0.869053	57142, 3060, 140606, 10113, 3895	119	439	8445	0.808273	1	0.99932	100
GOTERM_CC_FAT	GO:0005783~endoplasmic reticulum	7	5.88235	0.874073	57142, 3060, 140606, 857, 10113, 79041, 3895	92	585	6172	0.80275	1	0.999578	100
GOTERM_CC_FAT	GO:0031090~organelle membrane	7	5.88235	0.963943	163, 57142, 928, 857, 5371, 79041, 3895	92	723	6172	0.649528	1	0.999987	100
Annotation Cluster 57	Enrichment Score: 0.10494904285727535
Category	Term	Count	%	PValue	Genes	List Total	Pop Hits	Pop Total	Fold Enrichment	Bonferroni	Benjamini	FDR
GOTERM_CC_FAT	GO:0016604~nuclear body	3	2.52101	0.531937	23524, 10014, 5371	92	120	6172	1.67717	1	0.981418	99.9932
GOTERM_CC_FAT	GO:0005654~nucleoplasm	6	5.04202	0.936689	23524, 10014, 5371, 10445, 7508, 983	92	577	6172	0.697611	1	0.999946	100
GOTERM_CC_FAT	GO:0044451~nucleoplasm part	3	2.52101	0.97207	23524, 10014, 5371	92	358	6172	0.562181	1	0.999992	100
Annotation Cluster 58	Enrichment Score: 0.09999497421702545
Category	Term	Count	%	PValue	Genes	List Total	Pop Hits	Pop Total	Fold Enrichment	Bonferroni	Benjamini	FDR
GOTERM_BP_FAT	GO:0006916~anti-apoptosis	3	2.52101	0.612969	1191, 23564, 983	97	140	6549	1.44676	1	0.99771	100
GOTERM_BP_FAT	GO:0043066~negative regulation of apoptosis	3	2.52101	0.863361	1191, 23564, 983	97	234	6549	0.865583	1	0.999964	100
GOTERM_BP_FAT	GO:0043069~negative regulation of programmed cell death	3	2.52101	0.866563	1191, 23564, 983	97	236	6549	0.858247	1	0.999967	100
GOTERM_BP_FAT	GO:0060548~negative regulation of cell death	3	2.52101	0.868139	1191, 23564, 983	97	237	6549	0.854626	1	0.999968	100
Annotation Cluster 59	Enrichment Score: 0.0986631117348135
Category	Term	Count	%	PValue	Genes	List Total	Pop Hits	Pop Total	Fold Enrichment	Bonferroni	Benjamini	FDR
GOTERM_BP_FAT	GO:0006397~mRNA processing	4	3.36134	0.681433	23524, 9991, 4154, 10659	97	237	6549	1.1395	1	0.998978	100
GOTERM_BP_FAT	GO:0016071~mRNA metabolic process	4	3.36134	0.754937	23524, 9991, 4154, 10659	97	266	6549	1.01527	1	0.999673	100
GOTERM_BP_FAT	GO:0006396~RNA processing	5	4.20168	0.819771	64121, 23524, 9991, 4154, 10659	97	382	6549	0.88371	1	0.999887	100
SP_PIR_KEYWORDS	rna-binding	4	3.36134	0.844416	23524, 9991, 4154, 10659	119	329	8445	0.862813	1	0.998985	100
GOTERM_MF_FAT	GO:0003723~RNA binding	5	4.20168	0.901781	23524, 9991, 6124, 4154, 10659	91	451	6200	0.755342	1	0.999998	100
Annotation Cluster 60	Enrichment Score: 0.09184381314366617
Category	Term	Count	%	PValue	Genes	List Total	Pop Hits	Pop Total	Fold Enrichment	Bonferroni	Benjamini	FDR
GOTERM_BP_FAT	GO:0009057~macromolecule catabolic process	7	5.88235	0.702019	4627, 23327, 55768, 9246, 55884, 7508, 983	97	473	6549	0.999172	1	0.999239	100
GOTERM_BP_FAT	GO:0006508~proteolysis	8	6.72269	0.751861	824, 1191, 4627, 10404, 23327, 9246, 55884, 983	97	576	6549	0.937715	1	0.999687	100
GOTERM_BP_FAT	GO:0044265~cellular macromolecule catabolic process	6	5.04202	0.784061	4627, 23327, 9246, 55884, 7508, 983	97	441	6549	0.918578	1	0.999797	100
GOTERM_BP_FAT	GO:0051603~proteolysis involved in cellular protein catabolic process	5	4.20168	0.787352	4627, 23327, 9246, 55884, 983	97	363	6549	0.929965	1	0.999799	100
GOTERM_BP_FAT	GO:0044257~cellular protein catabolic process	5	4.20168	0.787352	4627, 23327, 9246, 55884, 983	97	363	6549	0.929965	1	0.999799	100
GOTERM_BP_FAT	GO:0030163~protein catabolic process	5	4.20168	0.80324	4627, 23327, 9246, 55884, 983	97	372	6549	0.907466	1	0.999852	100
GOTERM_BP_FAT	GO:0019941~modification-dependent protein catabolic process	4	3.36134	0.8885	23327, 9246, 55884, 983	97	345	6549	0.782788	1	0.999984	100
GOTERM_BP_FAT	GO:0043632~modification-dependent macromolecule catabolic process	4	3.36134	0.8885	23327, 9246, 55884, 983	97	345	6549	0.782788	1	0.999984	100
SP_PIR_KEYWORDS	ubl conjugation pathway	3	2.52101	0.916371	23327, 9246, 55884	119	289	8445	0.736675	1	0.999796	100
Annotation Cluster 61	Enrichment Score: 0.08130903880207285
Category	Term	Count	%	PValue	Genes	List Total	Pop Hits	Pop Total	Fold Enrichment	Bonferroni	Benjamini	FDR
SP_PIR_KEYWORDS	transmembrane protein	6	5.04202	0.562406	1435, 6383, 3339, 928, 857, 10544	119	357	8445	1.19271	1	0.987012	99.9974
GOTERM_CC_FAT	GO:0005887~integral to plasma membrane	8	6.72269	0.657652	6383, 4627, 57127, 928, 961, 857, 10544, 3895	92	521	6172	1.03013	1	0.992506	99.9999
GOTERM_CC_FAT	GO:0031226~intrinsic to plasma membrane	8	6.72269	0.679488	6383, 4627, 57127, 928, 961, 857, 10544, 3895	92	532	6172	1.00883	1	0.993805	99.9999
UP_SEQ_FEATURE	topological domain:Cytoplasmic	15	12.605	0.846366	26526, 1435, 57142, 942, 143502, 928, 961, 10544, 857, 79041, 3895, 6383, 57127, 92745, 10113	119	1244	8439	0.855096	1	1	100
SP_PIR_KEYWORDS	membrane	33	27.7311	0.884596	84293, 824, 1435, 8519, 942, 25798, 928, 57584, 961, 10544, 79041, 401494, 3895, 92745, 10466, 10113, 26526, 6717, 57142, 2014, 143502, 857, 4478, 5493, 163, 5998, 6383, 57127, 9110, 553115, 135228, 55013, 50807	119	2683	8445	0.872863	1	0.999512	100
UP_SEQ_FEATURE	topological domain:Extracellular	9	7.56303	0.936063	26526, 942, 6383, 57127, 143502, 928, 961, 92745, 10544	119	882	8439	0.723632	1	1	100
UP_SEQ_FEATURE	transmembrane region	21	17.6471	0.95697	26526, 84293, 1435, 57142, 8519, 942, 2014, 143502, 928, 25798, 961, 857, 10544, 79041, 401494, 3895, 6383, 57127, 92745, 10113, 55013	119	1938	8439	0.768439	1	1	100
SP_PIR_KEYWORDS	transmembrane	21	17.6471	0.960032	26526, 84293, 1435, 57142, 8519, 942, 2014, 143502, 928, 25798, 961, 857, 10544, 79041, 401494, 3895, 6383, 57127, 92745, 10113, 55013	119	1951	8445	0.763862	1	0.999969	100
GOTERM_CC_FAT	GO:0016021~integral to membrane	24	20.1681	0.974712	26526, 84293, 1435, 57142, 8519, 942, 2014, 143502, 928, 25798, 961, 857, 10493, 10544, 79041, 401494, 3895, 6383, 4627, 57127, 3633, 92745, 10113, 55013	92	2110	6172	0.763074	1	0.999993	100
GOTERM_CC_FAT	GO:0031224~intrinsic to membrane	25	21.0084	0.975019	84293, 1435, 8519, 942, 928, 25798, 10544, 961, 79041, 401494, 3895, 3633, 92745, 10113, 26526, 57142, 2014, 143502, 857, 10493, 6383, 4627, 57127, 135228, 55013	92	2185	6172	0.767585	1	0.999992	100
Annotation Cluster 62	Enrichment Score: 0.07923191629404665
Category	Term	Count	%	PValue	Genes	List Total	Pop Hits	Pop Total	Fold Enrichment	Bonferroni	Benjamini	FDR
GOTERM_BP_FAT	GO:0045184~establishment of protein localization	8	6.72269	0.624077	9181, 163, 4627, 2316, 7533, 10466, 5371, 10113	97	508	6549	1.06324	1	0.997903	100
GOTERM_BP_FAT	GO:0016192~vesicle-mediated transport	5	4.20168	0.816558	163, 2316, 10466, 857, 10113	97	380	6549	0.888361	1	0.999885	100
SP_PIR_KEYWORDS	protein transport	3	2.52101	0.948565	163, 10466, 10113	119	330	8445	0.645149	1	0.999948	100
SP_PIR_KEYWORDS	transport	6	5.04202	0.997195	163, 57127, 10466, 10113, 2745, 79041	119	917	8445	0.464338	1	1	100
Annotation Cluster 63	Enrichment Score: 0.04674057674556775
Category	Term	Count	%	PValue	Genes	List Total	Pop Hits	Pop Total	Fold Enrichment	Bonferroni	Benjamini	FDR
SP_PIR_KEYWORDS	Protease	3	2.52101	0.860048	824, 10404, 10987	119	244	8445	0.872538	1	0.999229	100
GOTERM_MF_FAT	GO:0070011~peptidase activity, acting on L-amino acid peptides	3	2.52101	0.910018	824, 10404, 10987	91	271	6200	0.754227	1	0.999998	100
GOTERM_MF_FAT	GO:0008233~peptidase activity	3	2.52101	0.925136	824, 10404, 10987	91	286	6200	0.71467	1	0.999999	100
Annotation Cluster 64	Enrichment Score: 0.04486034696613286
Category	Term	Count	%	PValue	Genes	List Total	Pop Hits	Pop Total	Fold Enrichment	Bonferroni	Benjamini	FDR
GOTERM_BP_FAT	GO:0051726~regulation of cell cycle	4	3.36134	0.60617	5371, 7508, 10987, 983	97	212	6549	1.27388	1	0.997676	100
GOTERM_CC_FAT	GO:0005730~nucleolus	5	4.20168	0.888395	4478, 5371, 10445, 81887, 10987	92	431	6172	0.778271	1	0.99969	100
GOTERM_CC_FAT	GO:0005654~nucleoplasm	6	5.04202	0.936689	23524, 10014, 5371, 10445, 7508, 983	92	577	6172	0.697611	1	0.999946	100
GOTERM_CC_FAT	GO:0031981~nuclear lumen	9	7.56303	0.971138	23524, 10014, 4478, 5371, 10445, 81887, 7508, 10987, 983	92	920	6172	0.656285	1	0.999993	100
GOTERM_CC_FAT	GO:0043233~organelle lumen	10	8.40336	0.995895	23524, 10014, 4478, 1191, 5371, 10445, 81887, 7508, 10987, 983	92	1202	6172	0.558128	1	1	100
GOTERM_CC_FAT	GO:0031974~membrane-enclosed lumen	10	8.40336	0.996832	23524, 10014, 4478, 1191, 5371, 10445, 81887, 7508, 10987, 983	92	1226	6172	0.547202	1	1	100
GOTERM_CC_FAT	GO:0070013~intracellular organelle lumen	9	7.56303	0.997849	23524, 10014, 4478, 5371, 10445, 81887, 7508, 10987, 983	92	1170	6172	0.516054	1	1	100
Annotation Cluster 65	Enrichment Score: 0.03179176919032584
Category	Term	Count	%	PValue	Genes	List Total	Pop Hits	Pop Total	Fold Enrichment	Bonferroni	Benjamini	FDR
GOTERM_BP_FAT	GO:0010604~positive regulation of macromolecule metabolic process	7	5.88235	0.757188	10014, 1435, 942, 7533, 857, 5371, 983	97	503	6549	0.939579	1	0.999652	100
GOTERM_BP_FAT	GO:0010628~positive regulation of gene expression	4	3.36134	0.868227	10014, 1435, 942, 7533	97	329	6549	0.820857	1	0.999966	100
GOTERM_BP_FAT	GO:0045941~positive regulation of transcription	3	2.52101	0.952749	10014, 942, 7533	97	320	6549	0.632957	1	1	100
GOTERM_BP_FAT	GO:0045935~positive regulation of nucleobase, nucleoside, nucleotide and nucleic acid metabolic process	3	2.52101	0.969166	10014, 942, 7533	97	353	6549	0.573786	1	1	100
GOTERM_BP_FAT	GO:0010557~positive regulation of macromolecule biosynthetic process	3	2.52101	0.975012	10014, 942, 7533	97	369	6549	0.548906	1	1	100
GOTERM_BP_FAT	GO:0051173~positive regulation of nitrogen compound metabolic process	3	2.52101	0.975339	10014, 942, 7533	97	370	6549	0.547423	1	1	100
GOTERM_BP_FAT	GO:0031328~positive regulation of cellular biosynthetic process	3	2.52101	0.981592	10014, 942, 7533	97	392	6549	0.5167	1	1	100
GOTERM_BP_FAT	GO:0009891~positive regulation of biosynthetic process	3	2.52101	0.982552	10014, 942, 7533	97	396	6549	0.511481	1	1	100
Annotation Cluster 66	Enrichment Score: 0.006658728300991519
Category	Term	Count	%	PValue	Genes	List Total	Pop Hits	Pop Total	Fold Enrichment	Bonferroni	Benjamini	FDR
GOTERM_BP_FAT	GO:0006468~protein amino acid phosphorylation	3	2.52101	0.970739	2771, 5371, 983	97	357	6549	0.567357	1	1	100
GOTERM_BP_FAT	GO:0006796~phosphate metabolic process	4	3.36134	0.988574	2771, 9110, 5371, 983	97	541	6549	0.49919	1	1	100
GOTERM_BP_FAT	GO:0006793~phosphorus metabolic process	4	3.36134	0.988574	2771, 9110, 5371, 983	97	541	6549	0.49919	1	1	100
GOTERM_BP_FAT	GO:0016310~phosphorylation	3	2.52101	0.99139	2771, 5371, 983	97	448	6549	0.452112	1	1	100

## Sheet: Functional cluster 2
Annotation Cluster 1	Enrichment Score: 3.7209453368372185
Category	Term	Count	%	PValue	Genes	List Total	Pop Hits	Pop Total	Fold Enrichment	Bonferroni	Benjamini	FDR
GOTERM_CC_FAT	GO:0044421~extracellular region part	15	29.4118	6.0401e-06	10516, 4852, 649, 9510, 2335, 63923, 7980, 4811, 356, 4060, 1634, 7076, 710, 58189, 3075	46	494	6172	4.07411	0.000706445	0.000706445	0.00690162
SP_PIR_KEYWORDS	Secreted	16	31.3725	6.22102e-06	10516, 6284, 4852, 9510, 2335, 7980, 4811, 356, 2882, 4060, 3977, 1634, 7076, 710, 58189, 3075	51	690	8445	3.83973	0.00105702	0.00105702	0.00758927
SP_PIR_KEYWORDS	signal	22	43.1373	7.93463e-06	10516, 4852, 9510, 649, 63923, 114908, 2335, 65010, 7980, 148066, 4811, 2882, 4060, 3678, 3977, 1634, 7076, 5797, 710, 58189, 3075, 4881	51	1330	8445	2.73905	0.00134798	0.000674219	0.00967969
UP_SEQ_FEATURE	signal peptide	22	43.1373	8.02547e-06	10516, 4852, 9510, 649, 63923, 114908, 2335, 65010, 7980, 148066, 4811, 2882, 4060, 3678, 3977, 1634, 7076, 5797, 710, 58189, 3075, 4881	51	1330	8439	2.73711	0.00278898	0.00278898	0.0109664
UP_SEQ_FEATURE	disulfide bond	19	37.2549	1.23492e-05	10516, 649, 9510, 63923, 2335, 65010, 7980, 4811, 356, 4060, 3678, 3977, 1634, 7076, 5797, 710, 58189, 3075, 4881	51	1031	8439	3.04941	0.00428834	0.00214647	0.0168741
SP_PIR_KEYWORDS	disulfide bond	19	37.2549	2.3027e-05	10516, 649, 9510, 63923, 2335, 65010, 7980, 4811, 356, 4060, 3678, 3977, 1634, 7076, 5797, 710, 58189, 3075, 4881	51	1079	8445	2.91583	0.00390698	0.00130403	0.0280889
SP_PIR_KEYWORDS	glycoprotein	24	47.0588	2.78312e-05	10516, 9510, 649, 63923, 114908, 2335, 55117, 4071, 65010, 8611, 148066, 7980, 4811, 356, 4060, 3678, 219623, 3977, 1634, 7076, 5797, 710, 3075, 4881	51	1687	8445	2.35573	0.00472019	0.00118214	0.0339483
GOTERM_CC_FAT	GO:0005578~proteinaceous extracellular matrix	9	17.6471	3.683e-05	10516, 7980, 4811, 4060, 9510, 1634, 7076, 63923, 2335	46	179	6172	6.74617	0.00429992	0.00215228	0.0420764
UP_SEQ_FEATURE	glycosylation site:N-linked (GlcNAc...)	23	45.098	3.84149e-05	10516, 9510, 649, 63923, 114908, 2335, 55117, 4071, 65010, 8611, 7980, 148066, 4811, 356, 3678, 219623, 3977, 1634, 7076, 5797, 710, 3075, 4881	51	1592	8439	2.39059	0.0132797	0.0044463	0.0524817
GOTERM_CC_FAT	GO:0031012~extracellular matrix	9	17.6471	6.7878e-05	10516, 7980, 4811, 4060, 9510, 1634, 7076, 63923, 2335	46	195	6172	6.19264	0.00791054	0.00264383	0.0775346
GOTERM_CC_FAT	GO:0005576~extracellular region	17	33.3333	0.000143612	10516, 4852, 649, 9510, 2335, 63923, 7980, 4811, 356, 2882, 4060, 3977, 1634, 7076, 710, 58189, 3075	46	831	6172	2.74483	0.0166634	0.00419215	0.163978
GOTERM_BP_FAT	GO:0043062~extracellular structure organization	5	9.80392	0.00229098	10516, 4811, 4060, 1634, 4131	42	90	6549	8.6627	0.760981	0.300789	3.34833
GOTERM_BP_FAT	GO:0030198~extracellular matrix organization	4	7.84314	0.00728399	10516, 4811, 4060, 1634	42	64	6549	9.74554	0.989557	0.33947	10.2868
SP_PIR_KEYWORDS	extracellular matrix	5	9.80392	0.00946611	4811, 4060, 9510, 1634, 2335	51	141	8445	5.87192	0.801488	0.164442	10.9556
SP_PIR_KEYWORDS	sulfation	3	5.88235	0.0125963	4811, 4060, 2335	51	29	8445	17.1298	0.884094	0.19386	14.3284
GOTERM_CC_FAT	GO:0044420~extracellular matrix part	4	7.84314	0.0188353	4811, 4060, 9510, 2335	46	78	6172	6.88071	0.891906	0.272268	19.5294
GOTERM_CC_FAT	GO:0005604~basement membrane	3	5.88235	0.0566521	4811, 9510, 2335	46	53	6172	7.59475	0.998912	0.347188	48.6449
Annotation Cluster 2	Enrichment Score: 2.2568718370949568
Category	Term	Count	%	PValue	Genes	List Total	Pop Hits	Pop Total	Fold Enrichment	Bonferroni	Benjamini	FDR
GOTERM_BP_FAT	GO:0007155~cell adhesion	9	17.6471	0.00136102	10516, 65010, 388, 4811, 649, 3678, 63923, 2335, 5797	42	355	6549	3.95312	0.572523	0.572523	2.00198
GOTERM_BP_FAT	GO:0022610~biological adhesion	9	17.6471	0.00138591	10516, 65010, 388, 4811, 649, 3678, 63923, 2335, 5797	42	356	6549	3.94201	0.57912	0.351248	2.03824
INTERPRO	IPR013032:EGF-like region, conserved site	6	11.7647	0.00191586	10516, 65010, 4811, 649, 63923, 2335	49	145	7752	6.54638	0.313308	0.313308	2.36722
SP_PIR_KEYWORDS	egf-like domain	5	9.80392	0.00478542	10516, 65010, 4811, 649, 63923	51	116	8445	7.13742	0.557571	0.127081	5.68421
SP_PIR_KEYWORDS	cell adhesion	6	11.7647	0.00544974	10516, 388, 4811, 3678, 2335, 5797	51	193	8445	5.14782	0.605048	0.109635	6.44941
GOTERM_BP_FAT	GO:0007160~cell-matrix adhesion	4	7.84314	0.00580747	10516, 4811, 63923, 2335	42	59	6549	10.5714	0.973601	0.405006	8.28494
GOTERM_BP_FAT	GO:0031589~cell-substrate adhesion	4	7.84314	0.0082674	10516, 4811, 63923, 2335	42	67	6549	9.30917	0.994374	0.309281	11.5974
GOTERM_BP_FAT	GO:0016337~cell-cell adhesion	4	7.84314	0.0295452	65010, 649, 3678, 5797	42	108	6549	5.77513	1	0.475501	35.9377
UP_SEQ_FEATURE	short sequence motif:Cell attachment site	3	5.88235	0.0364795	10516, 4811, 2335	51	51	8439	9.73356	0.999998	0.602964	39.8192
Annotation Cluster 3	Enrichment Score: 2.016693823453283
Category	Term	Count	%	PValue	Genes	List Total	Pop Hits	Pop Total	Fold Enrichment	Bonferroni	Benjamini	FDR
UP_SEQ_FEATURE	domain:Fibronectin type-III 4	4	7.84314	0.00102912	3977, 63923, 2335, 5797	51	34	8439	19.4671	0.30115	0.0856845	1.39718
INTERPRO	IPR003961:Fibronectin, type III	5	9.80392	0.00206162	4638, 3977, 63923, 2335, 5797	49	88	7752	8.98887	0.332686	0.183107	2.54518
INTERPRO	IPR008957:Fibronectin, type III-like fold	5	9.80392	0.00206162	4638, 3977, 63923, 2335, 5797	49	88	7752	8.98887	0.332686	0.183107	2.54518
UP_SEQ_FEATURE	domain:Fibronectin type-III 3	4	7.84314	0.00248358	3977, 63923, 2335, 5797	51	46	8439	14.3887	0.5791	0.134308	3.34098
UP_SEQ_FEATURE	domain:Fibronectin type-III 6	3	5.88235	0.00442066	3977, 63923, 2335	51	17	8439	29.2007	0.786004	0.197688	5.87466
GOTERM_BP_FAT	GO:0048812~neuron projection morphogenesis	5	9.80392	0.00537052	65010, 3977, 63923, 5797, 4131	42	114	6549	6.83897	0.965273	0.428814	7.68459
GOTERM_BP_FAT	GO:0000902~cell morphogenesis	6	11.7647	0.00585474	65010, 3977, 63923, 2335, 5797, 4131	42	187	6549	5.00306	0.974373	0.36746	8.34967
UP_SEQ_FEATURE	domain:Fibronectin type-III 2	4	7.84314	0.00632648	3977, 63923, 2335, 5797	51	64	8439	10.3419	0.890147	0.241245	8.30725
UP_SEQ_FEATURE	domain:Fibronectin type-III 1	4	7.84314	0.00632648	3977, 63923, 2335, 5797	51	64	8439	10.3419	0.890147	0.241245	8.30725
SMART	SM00060:FN3	5	9.80392	0.00757284	4638, 3977, 63923, 2335, 5797	38	88	4108	6.14234	0.375812	0.375812	7.38436
GOTERM_BP_FAT	GO:0000904~cell morphogenesis involved in differentiation	5	9.80392	0.0080627	65010, 63923, 2335, 5797, 4131	42	128	6549	6.09096	0.9936	0.32198	11.3261
GOTERM_BP_FAT	GO:0048858~cell projection morphogenesis	5	9.80392	0.00850815	65010, 3977, 63923, 5797, 4131	42	130	6549	5.99725	0.995165	0.299144	11.9155
UP_SEQ_FEATURE	domain:Fibronectin type-III 5	3	5.88235	0.00946156	3977, 63923, 2335	51	25	8439	19.8565	0.963422	0.25974	12.1825
GOTERM_BP_FAT	GO:0031175~neuron projection development	5	9.80392	0.00969195	65010, 3977, 63923, 5797, 4131	42	135	6549	5.77513	0.997706	0.316022	13.4643
GOTERM_BP_FAT	GO:0032990~cell part morphogenesis	5	9.80392	0.0104515	65010, 3977, 63923, 5797, 4131	42	138	6549	5.64959	0.998578	0.319991	14.4445
GOTERM_BP_FAT	GO:0032989~cellular component morphogenesis	6	11.7647	0.0106191	65010, 3977, 63923, 2335, 5797, 4131	42	216	6549	4.33135	0.998721	0.309334	14.6595
GOTERM_BP_FAT	GO:0048666~neuron development	5	9.80392	0.0206284	65010, 3977, 63923, 5797, 4131	42	169	6549	4.61327	0.999998	0.431929	26.6189
GOTERM_BP_FAT	GO:0007409~axonogenesis	4	7.84314	0.0229737	65010, 63923, 5797, 4131	42	98	6549	6.36443	0.999999	0.440165	29.1854
GOTERM_BP_FAT	GO:0048667~cell morphogenesis involved in neuron differentiation	4	7.84314	0.0268087	65010, 63923, 5797, 4131	42	104	6549	5.99725	1	0.46636	33.2023
GOTERM_BP_FAT	GO:0030030~cell projection organization	5	9.80392	0.0359921	65010, 3977, 63923, 5797, 4131	42	201	6549	3.87882	1	0.533474	41.9743
GOTERM_BP_FAT	GO:0030182~neuron differentiation	5	9.80392	0.0406493	65010, 3977, 63923, 5797, 4131	42	209	6549	3.73035	1	0.554796	46.0003
UCSC_TFBS	CREBP1CJUN	6	11.7647	0.722757	3977, 2335, 5797, 4131, 1827, 9644	51	999	8425	0.992169	1	0.782502	100
Annotation Cluster 4	Enrichment Score: 1.9882585761222695
Category	Term	Count	%	PValue	Genes	List Total	Pop Hits	Pop Total	Fold Enrichment	Bonferroni	Benjamini	FDR
GOTERM_BP_FAT	GO:0007155~cell adhesion	9	17.6471	0.00136102	10516, 65010, 388, 4811, 649, 3678, 63923, 2335, 5797	42	355	6549	3.95312	0.572523	0.572523	2.00198
GOTERM_BP_FAT	GO:0022610~biological adhesion	9	17.6471	0.00138591	10516, 65010, 388, 4811, 649, 3678, 63923, 2335, 5797	42	356	6549	3.94201	0.57912	0.351248	2.03824
INTERPRO	IPR013032:EGF-like region, conserved site	6	11.7647	0.00191586	10516, 65010, 4811, 649, 63923, 2335	49	145	7752	6.54638	0.313308	0.313308	2.36722
UP_SEQ_FEATURE	domain:EGF-like 1; calcium-binding	3	5.88235	0.00218628	10516, 65010, 649	51	12	8439	41.3676	0.533108	0.141296	2.94656
INTERPRO	IPR000152:EGF-type aspartate/asparagine hydroxylation conserved site	4	7.84314	0.00420139	10516, 65010, 4811, 649	49	53	7752	11.9399	0.561856	0.24048	5.12372
SP_PIR_KEYWORDS	egf-like domain	5	9.80392	0.00478542	10516, 65010, 4811, 649, 63923	51	116	8445	7.13742	0.557571	0.127081	5.68421
SP_PIR_KEYWORDS	calcium	8	15.6863	0.0051823	10516, 65010, 6284, 4638, 4811, 649, 3678, 728113	51	363	8445	3.64933	0.586576	0.118547	6.14204
UP_SEQ_FEATURE	domain:EGF-like 5; calcium-binding	3	5.88235	0.00736824	10516, 65010, 4811	51	22	8439	22.5642	0.923743	0.248707	9.61219
UP_SEQ_FEATURE	domain:EGF-like 3; calcium-binding	3	5.88235	0.00803961	10516, 65010, 4811	51	23	8439	21.5831	0.93974	0.244903	10.444
UP_SEQ_FEATURE	domain:EGF-like 2; calcium-binding	3	5.88235	0.0171045	10516, 65010, 649	51	34	8439	14.6003	0.997531	0.393664	21.0027
INTERPRO	IPR000742:EGF-like, type 3	4	7.84314	0.0212978	10516, 65010, 4811, 649	49	96	7752	6.59184	0.985293	0.65176	23.5808
INTERPRO	IPR013091:EGF calcium-binding	3	5.88235	0.0288559	10516, 4811, 649	49	43	7752	11.0375	0.996782	0.682663	30.6348
GOTERM_MF_FAT	GO:0005509~calcium ion binding	8	15.6863	0.0295044	10516, 65010, 6284, 4638, 4811, 649, 3678, 728113	45	428	6200	2.57529	0.995013	0.653604	30.7781
INTERPRO	IPR018097:EGF-like calcium-binding, conserved site	3	5.88235	0.0423546	10516, 4811, 649	49	53	7752	8.95495	0.999793	0.756768	41.7629
INTERPRO	IPR001881:EGF-like calcium-binding	3	5.88235	0.0452906	10516, 4811, 649	49	55	7752	8.62931	0.999887	0.726855	43.9545
INTERPRO	IPR006209:EGF	3	5.88235	0.0626942	65010, 4811, 649	49	66	7752	7.19109	0.999997	0.795312	55.4623
SMART	SM00179:EGF_CA	3	5.88235	0.087056	10516, 4811, 649	38	55	4108	5.89665	0.996472	0.940603	60.1139
Annotation Cluster 5	Enrichment Score: 1.802864110874292
Category	Term	Count	%	PValue	Genes	List Total	Pop Hits	Pop Total	Fold Enrichment	Bonferroni	Benjamini	FDR
GOTERM_BP_FAT	GO:0034330~cell junction organization	4	7.84314	0.00191623	50855, 3678, 2335, 7145	42	40	6549	15.5929	0.697862	0.328981	2.80786
GOTERM_BP_FAT	GO:0007044~cell-substrate junction assembly	3	5.88235	0.00611321	3678, 2335, 7145	42	19	6549	24.6203	0.978211	0.346328	8.70285
GOTERM_BP_FAT	GO:0006928~cell motion	7	13.7255	0.00630486	8611, 4852, 3678, 63923, 2335, 5797, 7145	42	271	6549	4.02768	0.980681	0.326097	8.9639
GOTERM_BP_FAT	GO:0034329~cell junction assembly	3	5.88235	0.0130419	3678, 2335, 7145	42	28	6549	16.7066	0.999723	0.322996	17.7104
GOTERM_BP_FAT	GO:0016477~cell migration	5	9.80392	0.0194487	8611, 3678, 63923, 2335, 7145	42	166	6549	4.69664	0.999995	0.427115	25.2954
GOTERM_BP_FAT	GO:0048870~cell motility	5	9.80392	0.0218516	8611, 3678, 63923, 2335, 7145	42	172	6549	4.53281	0.999999	0.436981	27.9681
GOTERM_BP_FAT	GO:0051674~localization of cell	5	9.80392	0.0218516	8611, 3678, 63923, 2335, 7145	42	172	6549	4.53281	0.999999	0.436981	27.9681
KEGG_PATHWAY	hsa04512:ECM-receptor interaction	3	5.88235	0.0727539	3678, 63923, 2335	23	57	2795	6.39588	0.966598	0.817237	50.8537
KEGG_PATHWAY	hsa04510:Focal adhesion	4	7.84314	0.0913648	4638, 3678, 63923, 2335	23	138	2795	3.52237	0.986587	0.762402	59.3855
Annotation Cluster 6	Enrichment Score: 1.6786445568134931
Category	Term	Count	%	PValue	Genes	List Total	Pop Hits	Pop Total	Fold Enrichment	Bonferroni	Benjamini	FDR
GOTERM_MF_FAT	GO:0030414~peptidase inhibitor activity	4	7.84314	0.0141506	7980, 7076, 710, 58189	45	72	6200	7.65432	0.919745	0.716707	16.0587
GOTERM_MF_FAT	GO:0004866~endopeptidase inhibitor activity	4	7.84314	0.0141506	7980, 7076, 710, 58189	45	72	6200	7.65432	0.919745	0.716707	16.0587
GOTERM_MF_FAT	GO:0004857~enzyme inhibitor activity	5	9.80392	0.019756	7980, 10788, 7076, 710, 58189	45	147	6200	4.68632	0.970748	0.58644	21.7366
SP_PIR_KEYWORDS	Serine protease inhibitor	3	5.88235	0.020052	7980, 710, 58189	51	37	8445	13.4261	0.968047	0.268782	21.8951
SP_PIR_KEYWORDS	protease inhibitor	3	5.88235	0.0265842	7980, 710, 58189	51	43	8445	11.5527	0.98975	0.317305	28.015
GOTERM_MF_FAT	GO:0004867~serine-type endopeptidase inhibitor activity	3	5.88235	0.0401885	7980, 710, 58189	45	45	6200	9.18519	0.999297	0.645547	39.5785
Annotation Cluster 7	Enrichment Score: 1.6781326340690266
Category	Term	Count	%	PValue	Genes	List Total	Pop Hits	Pop Total	Fold Enrichment	Bonferroni	Benjamini	FDR
GOTERM_BP_FAT	GO:0042060~wound healing	5	9.80392	0.00504378	10516, 7980, 3678, 2335, 710	42	112	6549	6.9611	0.957374	0.467971	7.23327
GOTERM_BP_FAT	GO:0009611~response to wounding	7	13.7255	0.00775415	10516, 7980, 3678, 2335, 710, 3075, 4131	42	283	6549	3.85689	0.99223	0.332881	10.9156
GOTERM_BP_FAT	GO:0050878~regulation of body fluid levels	4	7.84314	0.0112585	10516, 7980, 710, 4881	42	75	6549	8.31619	0.999146	0.297605	15.4748
GOTERM_BP_FAT	GO:0007596~blood coagulation	3	5.88235	0.0416421	10516, 7980, 710	42	52	6549	8.99588	1	0.55259	46.8242
GOTERM_BP_FAT	GO:0050817~coagulation	3	5.88235	0.0416421	10516, 7980, 710	42	52	6549	8.99588	1	0.55259	46.8242
SP_PIR_KEYWORDS	duplication	4	7.84314	0.046251	7980, 3678, 1634, 2335	51	136	8445	4.87024	0.999681	0.437308	43.8824
GOTERM_BP_FAT	GO:0007599~hemostasis	3	5.88235	0.0507121	10516, 7980, 710	42	58	6549	8.06527	1	0.615244	53.8265
Annotation Cluster 8	Enrichment Score: 1.3529639952525254
Category	Term	Count	%	PValue	Genes	List Total	Pop Hits	Pop Total	Fold Enrichment	Bonferroni	Benjamini	FDR
UP_TISSUE	Plasma	7	13.7255	0.000505421	4060, 7076, 63923, 2335, 5797, 710, 3075	50	173	8283	6.70301	0.0425456	0.0425456	0.543666
GOTERM_BP_FAT	GO:0009611~response to wounding	7	13.7255	0.00775415	10516, 7980, 3678, 2335, 710, 3075, 4131	42	283	6549	3.85689	0.99223	0.332881	10.9156
GOTERM_BP_FAT	GO:0002526~acute inflammatory response	3	5.88235	0.0604234	2335, 710, 3075	42	64	6549	7.30915	1	0.670831	60.3646
GOTERM_BP_FAT	GO:0006952~defense response	4	7.84314	0.256766	2335, 7407, 710, 3075	42	281	6549	2.21962	1	0.969613	98.7799
GOTERM_BP_FAT	GO:0006954~inflammatory response	3	5.88235	0.276517	2335, 710, 3075	42	165	6549	2.83506	1	0.972859	99.1821
SP_PIR_KEYWORDS	disease mutation	7	13.7255	0.453487	10516, 2632, 8803, 3977, 2335, 710, 3075	51	908	8445	1.27656	1	0.988505	99.9371
Annotation Cluster 9	Enrichment Score: 1.2876567059351574
Category	Term	Count	%	PValue	Genes	List Total	Pop Hits	Pop Total	Fold Enrichment	Bonferroni	Benjamini	FDR
SP_PIR_KEYWORDS	glycoprotein	24	47.0588	2.78312e-05	10516, 9510, 649, 63923, 114908, 2335, 55117, 4071, 65010, 8611, 148066, 7980, 4811, 356, 4060, 3678, 219623, 3977, 1634, 7076, 5797, 710, 3075, 4881	51	1687	8445	2.35573	0.00472019	0.00118214	0.0339483
UP_SEQ_FEATURE	glycosylation site:N-linked (GlcNAc...)	23	45.098	3.84149e-05	10516, 9510, 649, 63923, 114908, 2335, 55117, 4071, 65010, 8611, 7980, 148066, 4811, 356, 3678, 219623, 3977, 1634, 7076, 5797, 710, 3075, 4881	51	1592	8439	2.39059	0.0132797	0.0044463	0.0524817
GOTERM_CC_FAT	GO:0044459~plasma membrane part	15	29.4118	0.0142967	50855, 114908, 2335, 7145, 55117, 4071, 65010, 8611, 2791, 356, 3977, 3678, 5797, 84937, 4881	46	1050	6172	1.91677	0.814517	0.244819	15.1719
UP_SEQ_FEATURE	topological domain:Extracellular	11	21.5686	0.0316988	4071, 65010, 8611, 148066, 356, 3977, 3678, 114908, 5797, 55117, 4881	51	882	8439	2.06369	0.999986	0.577807	35.6081
GOTERM_CC_FAT	GO:0005887~integral to plasma membrane	9	17.6471	0.0325181	4071, 65010, 8611, 356, 3977, 3678, 5797, 55117, 4881	46	521	6172	2.31778	0.979097	0.296454	31.4598
GOTERM_CC_FAT	GO:0031226~intrinsic to plasma membrane	9	17.6471	0.0362202	4071, 65010, 8611, 356, 3977, 3678, 5797, 55117, 4881	46	532	6172	2.26986	0.986652	0.282536	34.3976
GOTERM_CC_FAT	GO:0005886~plasma membrane	18	35.2941	0.0504834	50855, 114908, 2335, 7145, 55117, 4071, 65010, 8611, 2791, 388, 356, 3678, 3977, 5797, 5287, 84937, 4131, 4881	46	1590	6172	1.51895	0.997668	0.332394	44.674
GOTERM_BP_FAT	GO:0007166~cell surface receptor linked signal transduction	8	15.6863	0.115695	65010, 8611, 2791, 4852, 3977, 3678, 9510, 4881	42	664	6549	1.87866	1	0.853111	83.8891
SP_PIR_KEYWORDS	receptor	6	11.7647	0.13365	65010, 3977, 3678, 114908, 5797, 4881	51	459	8445	2.16455	1	0.803275	82.6271
SP_PIR_KEYWORDS	transmembrane protein	5	9.80392	0.159711	4071, 356, 3678, 5797, 4881	51	357	8445	2.31916	1	0.824496	88.0314
UP_SEQ_FEATURE	topological domain:Cytoplasmic	11	21.5686	0.193202	4071, 65010, 8611, 148066, 356, 3977, 3678, 114908, 5797, 55117, 4881	51	1244	8439	1.46316	1	0.984244	94.6798
SP_PIR_KEYWORDS	membrane	17	33.3333	0.539377	50855, 114908, 55117, 4071, 65010, 8611, 2791, 148066, 388, 356, 219623, 3977, 3678, 5797, 5287, 84937, 4881	51	2683	8445	1.0492	1	0.994862	99.9922
UP_SEQ_FEATURE	transmembrane region	12	23.5294	0.619206	4071, 65010, 8611, 148066, 356, 3977, 3678, 219623, 114908, 5797, 55117, 4881	51	1938	8439	1.02459	1	1	99.9998
SP_PIR_KEYWORDS	transmembrane	12	23.5294	0.627972	4071, 65010, 8611, 148066, 356, 3977, 3678, 219623, 114908, 5797, 55117, 4881	51	1951	8445	1.01848	1	0.996314	99.9994
GOTERM_CC_FAT	GO:0031224~intrinsic to membrane	13	25.4902	0.919838	114908, 55117, 8611, 65010, 4071, 148066, 388, 356, 219623, 3977, 3678, 5797, 4881	46	2185	6172	0.798289	1	0.999578	100
GOTERM_CC_FAT	GO:0016021~integral to membrane	12	23.5294	0.941778	4071, 65010, 8611, 148066, 356, 3977, 3678, 219623, 114908, 5797, 55117, 4881	46	2110	6172	0.763074	1	0.999756	100
Annotation Cluster 10	Enrichment Score: 1.1787896635516415
Category	Term	Count	%	PValue	Genes	List Total	Pop Hits	Pop Total	Fold Enrichment	Bonferroni	Benjamini	FDR
GOTERM_BP_FAT	GO:0006928~cell motion	7	13.7255	0.00630486	8611, 4852, 3678, 63923, 2335, 5797, 7145	42	271	6549	4.02768	0.980681	0.326097	8.9639
GOTERM_CC_FAT	GO:0030054~cell junction	5	9.80392	0.111206	50855, 3678, 5797, 7145, 84937	46	253	6172	2.65166	0.999999	0.535262	74.0004
GOTERM_CC_FAT	GO:0005912~adherens junction	3	5.88235	0.154546	3678, 5797, 7145	46	96	6172	4.19293	1	0.574293	85.3148
GOTERM_CC_FAT	GO:0070161~anchoring junction	3	5.88235	0.17782	3678, 5797, 7145	46	105	6172	3.83354	1	0.585666	89.3254
Annotation Cluster 11	Enrichment Score: 1.0418765318862377
Category	Term	Count	%	PValue	Genes	List Total	Pop Hits	Pop Total	Fold Enrichment	Bonferroni	Benjamini	FDR
SP_PIR_KEYWORDS	extracellular matrix	5	9.80392	0.00946611	4811, 4060, 9510, 1634, 2335	51	141	8445	5.87192	0.801488	0.164442	10.9556
GOTERM_MF_FAT	GO:0005539~glycosaminoglycan binding	3	5.88235	0.112265	9510, 1634, 2335	45	81	6200	5.10288	1	0.878488	76.8382
GOTERM_MF_FAT	GO:0001871~pattern binding	3	5.88235	0.126284	9510, 1634, 2335	45	87	6200	4.75096	1	0.886081	80.9517
GOTERM_MF_FAT	GO:0030247~polysaccharide binding	3	5.88235	0.126284	9510, 1634, 2335	45	87	6200	4.75096	1	0.886081	80.9517
GOTERM_MF_FAT	GO:0030246~carbohydrate binding	3	5.88235	0.36434	9510, 1634, 2335	45	179	6200	2.30912	1	0.993345	99.6171
Annotation Cluster 12	Enrichment Score: 1.0054969063474246
Category	Term	Count	%	PValue	Genes	List Total	Pop Hits	Pop Total	Fold Enrichment	Bonferroni	Benjamini	FDR
UCSC_TFBS	HNF4	30	58.8235	0.0518284	7538, 5164, 649, 63923, 114908, 2335, 7145, 65010, 4071, 388, 4638, 3678, 5797, 5287, 4131, 1827, 4881, 10516, 2632, 7407, 8611, 4811, 8803, 2882, 10788, 7076, 84937, 710, 8470, 9644	51	3838	8425	1.29127	0.999914	0.513498	47.9556
UCSC_TFBS	SEF1	30	58.8235	0.128058	50855, 7538, 5164, 649, 9510, 114908, 2335, 7145, 728113, 65010, 2791, 9049, 4638, 388, 3678, 5797, 5287, 4131, 1827, 4881, 10516, 2632, 4200, 7407, 4811, 10788, 7076, 84937, 8470, 9644	51	4128	8425	1.20055	1	0.604499	81.3916
UCSC_TFBS	FOXO4	30	58.8235	0.145056	50855, 7538, 5164, 649, 9510, 63923, 114908, 2335, 7145, 65010, 4071, 4638, 388, 3678, 5797, 5287, 4131, 1827, 10516, 7407, 7980, 4811, 10788, 219623, 3977, 1634, 7076, 84937, 8470, 9644	51	4174	8425	1.18732	1	0.613693	85.3853
Annotation Cluster 13	Enrichment Score: 0.9829710705413177
Category	Term	Count	%	PValue	Genes	List Total	Pop Hits	Pop Total	Fold Enrichment	Bonferroni	Benjamini	FDR
GOTERM_BP_FAT	GO:0008361~regulation of cell size	5	9.80392	0.010713	63923, 114908, 58189, 4131, 4881	42	139	6549	5.60894	0.998795	0.29794	14.7797
GOTERM_BP_FAT	GO:0032535~regulation of cellular component size	5	9.80392	0.0271882	63923, 114908, 58189, 4131, 4881	42	184	6549	4.23719	1	0.458979	33.588
GOTERM_BP_FAT	GO:0001558~regulation of cell growth	3	5.88235	0.177155	58189, 4131, 4881	42	122	6549	3.83431	1	0.940963	94.4716
GOTERM_BP_FAT	GO:0040008~regulation of growth	3	5.88235	0.393992	58189, 4131, 4881	42	216	6549	2.16567	1	0.994533	99.9411
UP_TISSUE	Kidney	6	11.7647	0.598427	65010, 50855, 2335, 58189, 4131, 4881	50	872	8283	1.13986	1	0.996319	99.9947
Annotation Cluster 14	Enrichment Score: 0.9183679890230896
Category	Term	Count	%	PValue	Genes	List Total	Pop Hits	Pop Total	Fold Enrichment	Bonferroni	Benjamini	FDR
UCSC_TFBS	E4BP4	27	52.9412	0.0434686	6284, 7538, 649, 9510, 2335, 63923, 7145, 55117, 4071, 2791, 4638, 3678, 5797, 5287, 3075, 4131, 1827, 10516, 2632, 26528, 8611, 10788, 4060, 3977, 1634, 8470, 9644	51	3296	8425	1.35324	0.999599	0.50888	42.0364
UCSC_TFBS	HNF1	30	58.8235	0.162255	6284, 4852, 649, 63923, 2335, 7145, 55117, 2791, 4638, 3678, 5797, 5287, 3075, 4131, 1827, 10516, 2632, 7407, 8611, 148066, 356, 2882, 10788, 4060, 219623, 3977, 1634, 7076, 8470, 9644	51	4217	8425	1.17522	1	0.600064	88.611
UCSC_TFBS	HLF	22	43.1373	0.249185	2632, 7538, 4852, 649, 2335, 7145, 8611, 2791, 4638, 10788, 4060, 3678, 219623, 3977, 5797, 5287, 84937, 4131, 3075, 8470, 1827, 9644	51	3071	8425	1.18343	1	0.628066	97.0309
Annotation Cluster 15	Enrichment Score: 0.8879392154732457
Category	Term	Count	%	PValue	Genes	List Total	Pop Hits	Pop Total	Fold Enrichment	Bonferroni	Benjamini	FDR
GOTERM_CC_FAT	GO:0031093~platelet alpha granule lumen	3	5.88235	0.0237828	7076, 2335, 710	46	33	6172	12.1976	0.940168	0.296739	24.046
GOTERM_CC_FAT	GO:0060205~cytoplasmic membrane-bounded vesicle lumen	3	5.88235	0.026556	7076, 2335, 710	46	35	6172	11.5006	0.957107	0.295238	26.4753
GOTERM_CC_FAT	GO:0031983~vesicle lumen	3	5.88235	0.0294537	7076, 2335, 710	46	37	6172	10.879	0.969738	0.29516	28.9377
GOTERM_CC_FAT	GO:0031091~platelet alpha granule	3	5.88235	0.0356066	7076, 2335, 710	46	41	6172	9.8176	0.98562	0.297771	33.9188
GOTERM_CC_FAT	GO:0031982~vesicle	8	15.6863	0.0378943	356, 649, 9510, 7076, 2335, 5287, 84937, 710	46	439	6172	2.44508	0.989109	0.275913	35.688
GOTERM_CC_FAT	GO:0031410~cytoplasmic vesicle	7	13.7255	0.0794196	356, 9510, 7076, 2335, 5287, 84937, 710	46	416	6172	2.25773	0.999938	0.434204	61.1542
GOTERM_CC_FAT	GO:0031988~membrane-bounded vesicle	6	11.7647	0.135353	356, 649, 7076, 2335, 5287, 710	46	375	6172	2.14678	1	0.572922	81.0208
GOTERM_CC_FAT	GO:0030141~secretory granule	3	5.88235	0.193637	7076, 2335, 710	46	111	6172	3.62632	1	0.60648	91.4502
GOTERM_CC_FAT	GO:0044433~cytoplasmic vesicle part	3	5.88235	0.22578	7076, 2335, 710	46	123	6172	3.27253	1	0.656749	94.6286
GOTERM_CC_FAT	GO:0016023~cytoplasmic membrane-bounded vesicle	5	9.80392	0.264829	356, 7076, 2335, 5287, 710	46	359	6172	1.86872	1	0.68687	97.0265
GOTERM_CC_FAT	GO:0043233~organelle lumen	6	11.7647	0.954945	26528, 4200, 5164, 7076, 2335, 710	46	1202	6172	0.669753	1	0.999856	100
GOTERM_CC_FAT	GO:0031974~membrane-enclosed lumen	6	11.7647	0.960479	26528, 4200, 5164, 7076, 2335, 710	46	1226	6172	0.656642	1	0.999877	100
GOTERM_CC_FAT	GO:0070013~intracellular organelle lumen	3	5.88235	0.999127	26528, 4200, 5164	46	1170	6172	0.344036	1	1	100
Annotation Cluster 16	Enrichment Score: 0.8331045278953454
Category	Term	Count	%	PValue	Genes	List Total	Pop Hits	Pop Total	Fold Enrichment	Bonferroni	Benjamini	FDR
SP_PIR_KEYWORDS	calcium	8	15.6863	0.0051823	10516, 65010, 6284, 4638, 4811, 649, 3678, 728113	51	363	8445	3.64933	0.586576	0.118547	6.14204
GOTERM_MF_FAT	GO:0005509~calcium ion binding	8	15.6863	0.0295044	10516, 65010, 6284, 4638, 4811, 649, 3678, 728113	45	428	6200	2.57529	0.995013	0.653604	30.7781
GOTERM_MF_FAT	GO:0043167~ion binding	16	31.3725	0.390256	10516, 6284, 2632, 7538, 4200, 649, 9510, 728113, 65010, 148066, 4638, 4811, 3678, 84937, 8470, 4881	45	1931	6200	1.14161	1	0.994206	99.7704
GOTERM_MF_FAT	GO:0043169~cation binding	15	29.4118	0.495076	10516, 6284, 2632, 7538, 4200, 649, 9510, 728113, 65010, 148066, 4638, 4811, 3678, 84937, 8470	45	1906	6200	1.0843	1	0.998793	99.9774
SP_PIR_KEYWORDS	metal-binding	9	17.6471	0.56226	6284, 148066, 7538, 4200, 4638, 649, 9510, 7076, 84937	51	1354	8445	1.10066	1	0.994492	99.9958
GOTERM_MF_FAT	GO:0046872~metal ion binding	14	27.451	0.603956	10516, 6284, 7538, 4200, 649, 9510, 728113, 65010, 148066, 4638, 4811, 3678, 84937, 8470	45	1883	6200	1.02437	1	0.999593	99.9989
Annotation Cluster 17	Enrichment Score: 0.8010539804083222
Category	Term	Count	%	PValue	Genes	List Total	Pop Hits	Pop Total	Fold Enrichment	Bonferroni	Benjamini	FDR
GOTERM_BP_FAT	GO:0043627~response to estrogen stimulus	3	5.88235	0.0833957	58189, 4131, 1827	42	77	6549	6.07514	1	0.760676	72.5554
GOTERM_BP_FAT	GO:0010033~response to organic substance	7	13.7255	0.0894052	2791, 356, 3977, 7407, 58189, 4131, 1827	42	501	6549	2.17864	1	0.776538	75.1091
GOTERM_BP_FAT	GO:0048545~response to steroid hormone stimulus	3	5.88235	0.220558	58189, 4131, 1827	42	141	6549	3.31763	1	0.960809	97.5274
GOTERM_BP_FAT	GO:0009725~response to hormone stimulus	4	7.84314	0.226443	2791, 58189, 4131, 1827	42	263	6549	2.37154	1	0.961982	97.7906
GOTERM_BP_FAT	GO:0009719~response to endogenous stimulus	4	7.84314	0.265304	2791, 58189, 4131, 1827	42	286	6549	2.18082	1	0.969736	98.9722
Annotation Cluster 18	Enrichment Score: 0.7570956774024209
Category	Term	Count	%	PValue	Genes	List Total	Pop Hits	Pop Total	Fold Enrichment	Bonferroni	Benjamini	FDR
GOTERM_CC_FAT	GO:0030054~cell junction	5	9.80392	0.111206	50855, 3678, 5797, 7145, 84937	46	253	6172	2.65166	0.999999	0.535262	74.0004
GOTERM_CC_FAT	GO:0031252~cell leading edge	3	5.88235	0.144414	50855, 3678, 5797	46	92	6172	4.37524	1	0.580617	83.1734
GOTERM_CC_FAT	GO:0005911~cell-cell junction	3	5.88235	0.193637	50855, 3678, 5797	46	111	6172	3.62632	1	0.60648	91.4502
GOTERM_CC_FAT	GO:0042995~cell projection	5	9.80392	0.301225	50855, 3678, 5797, 4131, 9644	46	381	6172	1.76081	1	0.730314	98.3355
Annotation Cluster 19	Enrichment Score: 0.7014557346089529
Category	Term	Count	%	PValue	Genes	List Total	Pop Hits	Pop Total	Fold Enrichment	Bonferroni	Benjamini	FDR
GOTERM_CC_FAT	GO:0000267~cell fraction	8	15.6863	0.162297	10516, 65010, 8611, 9049, 388, 3678, 5287, 4131	46	622	6172	1.72571	1	0.563423	86.7818
SP_PIR_KEYWORDS	cell membrane	8	15.6863	0.165925	65010, 8611, 2791, 50855, 388, 356, 3977, 5287	51	769	8445	1.72263	1	0.819771	89.0676
GOTERM_CC_FAT	GO:0005624~membrane fraction	6	11.7647	0.226915	65010, 8611, 9049, 388, 3678, 5287	46	449	6172	1.79297	1	0.645959	94.7179
GOTERM_CC_FAT	GO:0005626~insoluble fraction	6	11.7647	0.255912	65010, 8611, 9049, 388, 3678, 5287	46	470	6172	1.71286	1	0.684256	96.5873
Annotation Cluster 20	Enrichment Score: 0.6858868414650335
Category	Term	Count	%	PValue	Genes	List Total	Pop Hits	Pop Total	Fold Enrichment	Bonferroni	Benjamini	FDR
UCSC_TFBS	BACH2	27	52.9412	0.0728258	6284, 50855, 7538, 5164, 4852, 649, 63923, 2335, 7145, 728113, 4071, 4638, 3678, 5797, 4131, 2632, 7407, 7980, 4811, 356, 10788, 219623, 3977, 7076, 84937, 8470, 9644	51	3443	8425	1.29547	0.999998	0.503625	60.4607
UCSC_TFBS	BACH1	29	56.8627	0.151683	50855, 7538, 5164, 649, 63923, 2335, 7145, 728113, 55117, 65010, 4071, 9049, 3678, 5797, 4131, 1827, 4881, 2632, 7407, 8611, 356, 10788, 219623, 3977, 1634, 7076, 84937, 8470, 9644	51	4023	8425	1.19082	1	0.595358	86.7162
UCSC_TFBS	AP1	27	52.9412	0.792718	50855, 7538, 4852, 649, 9510, 63923, 2335, 7145, 728113, 65010, 9049, 4638, 3678, 5797, 4131, 1827, 10516, 2632, 7407, 356, 2882, 10788, 3977, 7076, 84937, 8470, 9644	51	4776	8425	0.933897	1	0.820986	100
Annotation Cluster 21	Enrichment Score: 0.6537301290563768
Category	Term	Count	%	PValue	Genes	List Total	Pop Hits	Pop Total	Fold Enrichment	Bonferroni	Benjamini	FDR
UCSC_TFBS	E4BP4	27	52.9412	0.0434686	6284, 7538, 649, 9510, 2335, 63923, 7145, 55117, 4071, 2791, 4638, 3678, 5797, 5287, 3075, 4131, 1827, 10516, 2632, 26528, 8611, 10788, 4060, 3977, 1634, 8470, 9644	51	3296	8425	1.35324	0.999599	0.50888	42.0364
UCSC_TFBS	OCT	24	47.0588	0.311135	10516, 2632, 4200, 9510, 649, 63923, 2335, 7407, 7145, 55117, 8611, 388, 4638, 10788, 4060, 219623, 3977, 1634, 5797, 5287, 4131, 8470, 1827, 9644	51	3506	8425	1.13083	1	0.635484	98.9679
UCSC_TFBS	CREBP1	25	49.0196	0.369933	6284, 50855, 7538, 649, 9510, 2335, 63923, 7145, 55117, 4638, 388, 5797, 3075, 4131, 1827, 10516, 2632, 8611, 10788, 4060, 3977, 7076, 710, 8470, 9644	51	3766	8425	1.09663	1	0.638048	99.6547
UCSC_TFBS	FOXJ2	31	60.7843	0.485102	6284, 50855, 7538, 649, 55845, 63923, 2335, 7145, 55117, 2791, 4638, 388, 5797, 3075, 4131, 1827, 10516, 2632, 4200, 8611, 7980, 4811, 8803, 10788, 4060, 219623, 3977, 1634, 7076, 8470, 9644	51	4944	8425	1.03582	1	0.671307	99.971
Annotation Cluster 22	Enrichment Score: 0.6145618953896596
Category	Term	Count	%	PValue	Genes	List Total	Pop Hits	Pop Total	Fold Enrichment	Bonferroni	Benjamini	FDR
UCSC_TFBS	CDC5	25	49.0196	0.120546	2335, 63923, 7145, 728113, 55117, 2791, 4638, 5797, 4131, 10516, 2632, 26528, 4200, 7407, 8611, 7980, 4811, 10788, 4060, 3977, 219623, 1634, 84937, 8470, 9644	51	3279	8425	1.2595	1	0.625796	79.326
UCSC_TFBS	HFH3	23	45.098	0.151045	10516, 6284, 26528, 2632, 63923, 2335, 7145, 55117, 4071, 65010, 8611, 2791, 388, 4638, 4811, 10788, 3678, 219623, 3977, 5797, 4131, 8470, 9644	51	3034	8425	1.25231	1	0.605316	86.5931
UCSC_TFBS	POU3F2	25	49.0196	0.787146	7538, 4852, 2335, 63923, 7145, 55117, 65010, 2791, 4638, 388, 5797, 3075, 4131, 10516, 2632, 7407, 8611, 7980, 10788, 219623, 3977, 1634, 84937, 8470, 9644	51	4432	8425	0.931837	1	0.817656	100
Annotation Cluster 23	Enrichment Score: 0.6137826007475397
Category	Term	Count	%	PValue	Genes	List Total	Pop Hits	Pop Total	Fold Enrichment	Bonferroni	Benjamini	FDR
UCSC_TFBS	STAT	23	45.098	0.0615981	2632, 7538, 5164, 9510, 2335, 7407, 7145, 4638, 10788, 2882, 4060, 3678, 219623, 3977, 5797, 5287, 710, 84937, 4131, 8470, 1827, 9644, 4881	51	2753	8425	1.38013	0.999986	0.50309	54.1671
UCSC_TFBS	NFKB	26	50.9804	0.430243	6284, 50855, 7538, 5164, 649, 2335, 7145, 728113, 65010, 4638, 3678, 5287, 4131, 1827, 4881, 2632, 26528, 7407, 10788, 2882, 3977, 7076, 84937, 710, 8470, 9644	51	4025	8425	1.06711	1	0.647319	99.8995
UCSC_TFBS	HOX13	23	45.098	0.543714	10516, 50855, 26528, 7538, 5164, 649, 2335, 7407, 7145, 65010, 4638, 10788, 2882, 3678, 219623, 3977, 7076, 5797, 5287, 4131, 8470, 9644, 4881	51	3691	8425	1.0294	1	0.683616	99.9934
Annotation Cluster 24	Enrichment Score: 0.6120069263093205
Category	Term	Count	%	PValue	Genes	List Total	Pop Hits	Pop Total	Fold Enrichment	Bonferroni	Benjamini	FDR
UCSC_TFBS	E4BP4	27	52.9412	0.0434686	6284, 7538, 649, 9510, 2335, 63923, 7145, 55117, 4071, 2791, 4638, 3678, 5797, 5287, 3075, 4131, 1827, 10516, 2632, 26528, 8611, 10788, 4060, 3977, 1634, 8470, 9644	51	3296	8425	1.35324	0.999599	0.50888	42.0364
UCSC_TFBS	NKX3A	22	43.1373	0.498445	2632, 9510, 63923, 114908, 2335, 7145, 55117, 4071, 8611, 2791, 4638, 8803, 10788, 4060, 3678, 3977, 5797, 3075, 4131, 8470, 1827, 9644	51	3457	8425	1.05129	1	0.671821	99.979
UCSC_TFBS	CDP	27	52.9412	0.673266	6284, 7538, 9510, 63923, 2335, 7145, 55117, 4071, 2791, 9049, 4638, 3678, 5797, 5287, 3075, 4131, 10516, 2632, 8611, 4811, 8803, 10788, 219623, 3977, 84937, 8470, 9644	51	4561	8425	0.97792	1	0.747602	99.9999
Annotation Cluster 25	Enrichment Score: 0.586815174251633
Category	Term	Count	%	PValue	Genes	List Total	Pop Hits	Pop Total	Fold Enrichment	Bonferroni	Benjamini	FDR
UCSC_TFBS	HFH3	23	45.098	0.151045	10516, 6284, 26528, 2632, 63923, 2335, 7145, 55117, 4071, 65010, 8611, 2791, 388, 4638, 4811, 10788, 3678, 219623, 3977, 5797, 4131, 8470, 9644	51	3034	8425	1.25231	1	0.605316	86.5931
UCSC_TFBS	FREAC3	24	47.0588	0.170711	10516, 50855, 26528, 2632, 9510, 63923, 2335, 7145, 55117, 8611, 148066, 9049, 4638, 4811, 10788, 3678, 219623, 3977, 5797, 3075, 4131, 8470, 1827, 9644	51	3242	8425	1.22292	1	0.579778	89.9442
UCSC_TFBS	CDP	27	52.9412	0.673266	6284, 7538, 9510, 63923, 2335, 7145, 55117, 4071, 2791, 9049, 4638, 3678, 5797, 5287, 3075, 4131, 10516, 2632, 8611, 4811, 8803, 10788, 219623, 3977, 84937, 8470, 9644	51	4561	8425	0.97792	1	0.747602	99.9999
Annotation Cluster 26	Enrichment Score: 0.562088964900942
Category	Term	Count	%	PValue	Genes	List Total	Pop Hits	Pop Total	Fold Enrichment	Bonferroni	Benjamini	FDR
UCSC_TFBS	SOX9	25	49.0196	0.162627	6284, 7538, 649, 9510, 2335, 114908, 7145, 4071, 65010, 2791, 4638, 388, 9049, 5797, 5287, 3075, 4131, 10516, 2632, 7980, 8803, 10788, 3977, 8470, 9644	51	3387	8425	1.21934	1	0.590369	88.6729
UCSC_TFBS	SOX5	25	49.0196	0.303961	7538, 649, 9510, 2335, 114908, 7145, 55117, 65010, 4638, 388, 5797, 5287, 3075, 4131, 4881, 10516, 2632, 4200, 8611, 7980, 8803, 10788, 3977, 8470, 9644	51	3660	8425	1.12839	1	0.63661	98.828
UCSC_TFBS	NFAT	21	41.1765	0.416603	10516, 6284, 2632, 649, 114908, 7145, 65010, 8611, 4638, 8803, 10788, 3678, 219623, 3977, 5797, 5287, 4131, 3075, 8470, 1827, 9644	51	3171	8425	1.09401	1	0.647337	99.8657
Annotation Cluster 27	Enrichment Score: 0.5282471874733385
Category	Term	Count	%	PValue	Genes	List Total	Pop Hits	Pop Total	Fold Enrichment	Bonferroni	Benjamini	FDR
GOTERM_BP_FAT	GO:0008285~negative regulation of cell proliferation	4	7.84314	0.167076	8611, 9510, 5797, 58189	42	226	6549	2.7598	1	0.933867	93.3762
GOTERM_BP_FAT	GO:0042127~regulation of cell proliferation	6	11.7647	0.179504	8611, 3977, 9510, 7076, 5797, 58189	42	481	6549	1.94505	1	0.939543	94.7014
SP_PIR_KEYWORDS	hydrolase	4	7.84314	0.8675	8611, 649, 9510, 5797	51	804	8445	0.823822	1	0.999907	100
Annotation Cluster 28	Enrichment Score: 0.4741896466671475
Category	Term	Count	%	PValue	Genes	List Total	Pop Hits	Pop Total	Fold Enrichment	Bonferroni	Benjamini	FDR
UCSC_TFBS	IK1	26	50.9804	0.0103011	6284, 50855, 7538, 5164, 55845, 63923, 7145, 65010, 4071, 388, 9049, 3678, 5797, 5287, 4131, 1827, 10516, 2632, 26528, 7407, 4811, 10788, 3977, 7076, 8470, 9644	51	2802	8425	1.53287	0.838363	0.365933	11.9322
UCSC_TFBS	NCX	30	58.8235	0.0171016	50855, 4852, 649, 9510, 2335, 7145, 728113, 65010, 9049, 4638, 388, 3678, 5797, 5287, 4131, 4881, 10516, 2632, 26528, 7407, 8611, 2882, 10788, 219623, 3977, 1634, 7076, 84937, 8470, 9644	51	3552	8425	1.39524	0.95197	0.455117	19.0771
UCSC_TFBS	NFKAPPAB50	18	35.2941	0.02775	50855, 7538, 4200, 5164, 2335, 7407, 7145, 65010, 9049, 10788, 3678, 7076, 5797, 5287, 84937, 4131, 8470, 9644	51	1810	8425	1.64283	0.992938	0.461588	29.2021
UCSC_TFBS	MEIS1	29	56.8627	0.0548295	50855, 7538, 649, 63923, 114908, 2335, 7145, 65010, 9049, 4638, 3678, 5797, 5287, 58189, 3075, 4131, 4881, 2632, 4200, 7407, 8611, 4811, 356, 10788, 4060, 7076, 84937, 8470, 9644	51	3688	8425	1.29899	0.999951	0.483997	49.9414
UCSC_TFBS	HAND1E47	28	54.902	0.0873422	6284, 50855, 5164, 649, 55845, 63923, 2335, 7145, 728113, 55117, 65010, 4638, 9049, 3678, 5797, 5287, 4131, 10516, 2632, 7407, 10788, 219623, 3977, 1634, 7076, 84937, 8470, 9644	51	3664	8425	1.26242	1	0.552585	67.4216
UCSC_TFBS	TAXCREB	33	64.7059	0.0919033	6284, 50855, 7538, 5164, 4852, 9510, 2335, 7145, 728113, 55117, 65010, 9049, 388, 4638, 3678, 5797, 5287, 4131, 1827, 4881, 10516, 26528, 2632, 7407, 8611, 4811, 356, 10788, 7076, 84937, 710, 8470, 9644	51	4523	8425	1.20528	1	0.554234	69.3642
UCSC_TFBS	SEF1	30	58.8235	0.128058	50855, 7538, 5164, 649, 9510, 114908, 2335, 7145, 728113, 65010, 2791, 9049, 4638, 388, 3678, 5797, 5287, 4131, 1827, 4881, 10516, 2632, 4200, 7407, 4811, 10788, 7076, 84937, 8470, 9644	51	4128	8425	1.20055	1	0.604499	81.3916
UCSC_TFBS	NFY	29	56.8627	0.137798	50855, 7538, 5164, 649, 2335, 7145, 65010, 4071, 9049, 4638, 388, 3678, 5797, 5287, 4131, 4881, 10516, 2632, 26528, 4200, 8611, 10788, 2882, 4060, 219623, 3977, 7076, 84937, 8470	51	3987	8425	1.20158	1	0.606217	83.7877
UCSC_TFBS	BRACH	31	60.7843	0.146637	6284, 50855, 7538, 5164, 649, 63923, 2335, 7145, 728113, 65010, 2791, 9049, 4638, 3678, 5797, 5287, 4131, 1827, 2632, 26528, 7407, 4811, 8803, 10788, 219623, 1634, 7076, 84937, 710, 8470, 9644	51	4347	8425	1.17807	1	0.605555	85.7134
UCSC_TFBS	GCNF	32	62.7451	0.163968	6284, 50855, 5164, 4852, 649, 9510, 55845, 63923, 2335, 7145, 65010, 9049, 4638, 3678, 5797, 5287, 3075, 4131, 1827, 4881, 2632, 26528, 7407, 7980, 4811, 10788, 219623, 3977, 1634, 7076, 8470, 9644	51	4560	8425	1.15927	1	0.583363	88.8934
UCSC_TFBS	ER	29	56.8627	0.166033	50855, 5164, 649, 9510, 55845, 63923, 2335, 7145, 65010, 4638, 9049, 3678, 5797, 5287, 1827, 4881, 10516, 2632, 26528, 7407, 7980, 4811, 10788, 4060, 3977, 7076, 84937, 8470, 9644	51	4058	8425	1.18055	1	0.578378	89.2255
UCSC_TFBS	TCF11	29	56.8627	0.180334	6284, 50855, 7538, 4852, 649, 2335, 7145, 55117, 65010, 9049, 4638, 388, 3678, 5797, 5287, 4131, 4881, 4200, 7407, 8611, 4811, 356, 10788, 3977, 1634, 7076, 84937, 8470, 9644	51	4091	8425	1.17103	1	0.583127	91.286
UCSC_TFBS	IK2	18	35.2941	0.198148	10516, 6284, 26528, 7538, 649, 63923, 2335, 7145, 65010, 4811, 10788, 3678, 219623, 3977, 5287, 84937, 8470, 9644	51	2333	8425	1.27455	1	0.612468	93.3455
UCSC_TFBS	ARP1	27	52.9412	0.228881	6284, 7538, 5164, 649, 55845, 2335, 7145, 728113, 65010, 9049, 3678, 5797, 5287, 4131, 4881, 10516, 2632, 7407, 4811, 10788, 2882, 219623, 3977, 7076, 84937, 8470, 9644	51	3858	8425	1.15612	1	0.614422	95.8805
UCSC_TFBS	LYF1	22	43.1373	0.254271	10516, 6284, 50855, 26528, 4200, 5164, 649, 9510, 63923, 2335, 7407, 7145, 65010, 4811, 10788, 3678, 7076, 5797, 5287, 4131, 8470, 9644	51	3080	8425	1.17997	1	0.615666	97.2684
UCSC_TFBS	HMX1	26	50.9804	0.269566	6284, 50855, 7538, 5164, 9510, 2335, 7145, 65010, 2791, 4638, 9049, 3678, 5797, 5287, 4131, 4881, 2632, 26528, 7407, 4811, 356, 10788, 7076, 84937, 8470, 9644	51	3767	8425	1.14019	1	0.634019	97.8818
UCSC_TFBS	AP2REP	25	49.0196	0.284487	6284, 50855, 7538, 5164, 649, 55845, 2335, 7145, 728113, 4071, 65010, 4638, 9049, 3678, 5797, 5287, 4131, 10516, 26528, 7407, 356, 10788, 84937, 8470, 9644	51	3627	8425	1.13866	1	0.644287	98.3557
UCSC_TFBS	AHRARNT	29	56.8627	0.290394	6284, 50855, 7538, 5164, 649, 2335, 7145, 65010, 9049, 4638, 388, 3678, 5797, 58189, 4131, 1827, 4881, 10516, 26528, 7407, 8611, 148066, 4811, 10788, 3977, 7076, 84937, 8470, 9644	51	4305	8425	1.11282	1	0.634419	98.5148
UCSC_TFBS	SPZ1	19	37.2549	0.291586	6284, 50855, 26528, 7538, 5164, 649, 63923, 7145, 65010, 9049, 4638, 3678, 3977, 5287, 710, 84937, 8470, 4881, 9644	51	2653	8425	1.18309	1	0.630136	98.5451
UCSC_TFBS	OLF1	25	49.0196	0.308164	50855, 7538, 649, 9510, 2335, 7145, 728113, 65010, 2791, 4638, 388, 9049, 3678, 5287, 4131, 4881, 10516, 26528, 7407, 4811, 10788, 3977, 84937, 8470, 9644	51	3667	8425	1.12623	1	0.636914	98.912
UCSC_TFBS	ROAZ	25	49.0196	0.32275	6284, 50855, 7538, 4852, 649, 63923, 2335, 7145, 65010, 4638, 9049, 3678, 5797, 5287, 4131, 1827, 4881, 7407, 4811, 10788, 4060, 84937, 710, 8470, 9644	51	3691	8425	1.11891	1	0.640747	99.1623
UCSC_TFBS	ZID	26	50.9804	0.333507	6284, 50855, 7538, 649, 2335, 7145, 728113, 55117, 65010, 4638, 388, 9049, 3678, 5797, 5287, 4131, 4881, 10516, 7407, 8611, 4811, 2882, 3977, 84937, 8470, 9644	51	3875	8425	1.10841	1	0.650102	99.3117
UCSC_TFBS	STAT5A	30	58.8235	0.350094	6284, 50855, 7538, 5164, 649, 9510, 2335, 7145, 728113, 65010, 4071, 2791, 4638, 3678, 5797, 5287, 4131, 1827, 4881, 2632, 26528, 8611, 4811, 10788, 4060, 3977, 7076, 84937, 8470, 9644	51	4572	8425	1.08396	1	0.656379	99.4948
UCSC_TFBS	STAT1	22	43.1373	0.35204	50855, 2632, 7538, 5164, 649, 55845, 63923, 7407, 7145, 65010, 9049, 4638, 3678, 3977, 7076, 5797, 5287, 710, 84937, 4131, 8470, 9644	51	3240	8425	1.1217	1	0.65379	99.5131
UCSC_TFBS	AP2	15	29.4118	0.352911	50855, 26528, 7538, 649, 7145, 65010, 2791, 388, 3977, 3678, 7076, 5287, 84937, 4131, 9644	51	2093	8425	1.18392	1	0.649859	99.521
UCSC_TFBS	ISRE	23	45.098	0.35614	6284, 26528, 7538, 4200, 4852, 649, 63923, 2335, 7145, 4811, 4638, 10788, 2882, 3678, 3977, 5797, 5287, 710, 84937, 4131, 8470, 1827, 9644	51	3412	8425	1.11357	1	0.644125	99.5496
UCSC_TFBS	P300	21	41.1765	0.360099	10516, 6284, 50855, 26528, 7538, 5164, 649, 2335, 7145, 65010, 388, 4811, 3678, 3977, 7076, 5797, 5287, 4131, 8470, 9644, 4881	51	3087	8425	1.12378	1	0.64437	99.5824
UCSC_TFBS	CP2	22	43.1373	0.365731	6284, 50855, 7538, 5164, 649, 63923, 2335, 7407, 7145, 728113, 65010, 9049, 4638, 4811, 356, 3678, 7076, 5797, 84937, 58189, 4131, 9644	51	3261	8425	1.11448	1	0.646773	99.6253
UCSC_TFBS	RORA1	23	45.098	0.376284	6284, 50855, 26528, 2632, 7538, 5164, 9510, 649, 63923, 7145, 55117, 65010, 4638, 10788, 3678, 219623, 3977, 5797, 5287, 4131, 8470, 1827, 9644	51	3443	8425	1.10355	1	0.641459	99.695
UCSC_TFBS	MZF1	26	50.9804	0.407079	6284, 50855, 7538, 5164, 4852, 649, 9510, 55845, 63923, 2335, 7145, 65010, 4638, 9049, 3678, 5797, 5287, 4131, 1827, 10516, 7407, 10788, 2882, 84937, 8470, 9644	51	3990	8425	1.07647	1	0.648444	99.8362
UCSC_TFBS	ZIC3	21	41.1765	0.410463	50855, 7538, 649, 9510, 2335, 7407, 7145, 65010, 9049, 10788, 3678, 219623, 3977, 7076, 5797, 5287, 58189, 4131, 8470, 9644, 4881	51	3162	8425	1.09713	1	0.648294	99.8473
UCSC_TFBS	COMP1	26	50.9804	0.429578	50855, 7538, 4852, 2335, 7145, 65010, 2791, 4638, 9049, 3678, 5797, 5287, 4131, 1827, 4881, 2632, 26528, 7407, 8611, 4811, 3977, 7076, 84937, 710, 8470, 9644	51	4024	8425	1.06737	1	0.650444	99.8981
UCSC_TFBS	COUP	22	43.1373	0.43951	6284, 50855, 2632, 26528, 7538, 5164, 55845, 63923, 7145, 65010, 8611, 9049, 4638, 4811, 10788, 3678, 3977, 5797, 5287, 8470, 4881, 9644	51	3371	8425	1.07811	1	0.650222	99.9178
UCSC_TFBS	ARNT	25	49.0196	0.447084	6284, 50855, 7538, 5164, 649, 2335, 63923, 728113, 55117, 65010, 4638, 388, 9049, 3678, 5797, 5287, 4131, 26528, 4200, 4811, 10788, 7076, 84937, 8470, 9644	51	3883	8425	1.06359	1	0.651257	99.9305
UCSC_TFBS	HSF2	21	41.1765	0.464088	10516, 50855, 2632, 7538, 4200, 649, 2335, 7145, 65010, 2791, 4638, 4811, 10788, 3678, 3977, 5797, 5287, 58189, 8470, 9644, 4881	51	3240	8425	1.07072	1	0.662771	99.9526
UCSC_TFBS	AHR	18	35.2941	0.485112	50855, 26528, 7538, 5164, 649, 2335, 7407, 7145, 728113, 65010, 9049, 4638, 388, 4060, 3678, 5287, 84937, 9644	51	2769	8425	1.07386	1	0.66785	99.971
UCSC_TFBS	CDPCR3	27	52.9412	0.500545	6284, 50855, 5164, 649, 9510, 2335, 7145, 55117, 65010, 4638, 9049, 3678, 5797, 5287, 58189, 4131, 10516, 26528, 4200, 8611, 4811, 10788, 3977, 1634, 84937, 8470, 9644	51	4297	8425	1.038	1	0.670698	99.98
UCSC_TFBS	P53	33	64.7059	0.509437	6284, 50855, 7538, 5164, 4852, 649, 9510, 55845, 63923, 2335, 7145, 728113, 65010, 9049, 388, 4638, 3678, 5797, 5287, 58189, 4131, 4881, 10516, 26528, 2632, 4200, 7407, 4811, 10788, 7076, 84937, 8470, 9644	51	5314	8425	1.02587	1	0.673451	99.984
UCSC_TFBS	MRF2	25	49.0196	0.526059	6284, 50855, 7538, 5164, 649, 2335, 63923, 7145, 65010, 4638, 3678, 5797, 4131, 1827, 4881, 2632, 26528, 7407, 8611, 4811, 10788, 4060, 219623, 3977, 8470	51	4000	8425	1.03248	1	0.674762	99.9895
UCSC_TFBS	GATA2	18	35.2941	0.5437	10516, 50855, 5164, 649, 7407, 65010, 9049, 388, 4638, 4811, 3977, 5797, 5287, 58189, 4131, 8470, 4881, 9644	51	2851	8425	1.04298	1	0.686647	99.9934
UCSC_TFBS	HOX13	23	45.098	0.543714	10516, 50855, 26528, 7538, 5164, 649, 2335, 7407, 7145, 65010, 4638, 10788, 2882, 3678, 219623, 3977, 7076, 5797, 5287, 4131, 8470, 9644, 4881	51	3691	8425	1.0294	1	0.683616	99.9934
UCSC_TFBS	SREBP1	30	58.8235	0.545405	6284, 50855, 7538, 5164, 649, 63923, 2335, 7145, 728113, 55117, 65010, 9049, 388, 4638, 3678, 5797, 5287, 4131, 1827, 4881, 10516, 26528, 7407, 4811, 10788, 3977, 7076, 84937, 8470, 9644	51	4865	8425	1.01868	1	0.682313	99.9937
UCSC_TFBS	EN1	26	50.9804	0.54861	6284, 5164, 649, 9510, 2335, 63923, 114908, 7145, 65010, 2791, 4638, 9049, 3678, 5797, 5287, 4131, 1827, 4881, 10516, 2632, 26528, 4811, 10788, 3977, 8470, 9644	51	4201	8425	1.0224	1	0.68257	99.9942
UCSC_TFBS	TST1	21	41.1765	0.582161	10516, 7538, 4852, 649, 63923, 2335, 7145, 728113, 65010, 8611, 4638, 10788, 3678, 3977, 7076, 5797, 5287, 84937, 8470, 1827, 9644	51	3412	8425	1.01674	1	0.70161	99.9978
UCSC_TFBS	STAT3	23	45.098	0.591194	10516, 50855, 2632, 7538, 9510, 649, 7407, 7145, 65010, 9049, 4638, 4811, 10788, 2882, 4060, 3678, 7076, 5797, 5287, 84937, 4131, 8470, 9644	51	3762	8425	1.00997	1	0.693861	99.9983
UCSC_TFBS	PAX2	29	56.8627	0.598971	50855, 7538, 5164, 649, 9510, 55845, 2335, 7145, 728113, 55117, 65010, 4638, 388, 9049, 3678, 5797, 5287, 4131, 1827, 4881, 4200, 7407, 356, 10788, 219623, 7076, 84937, 8470, 9644	51	4778	8425	1.00266	1	0.69884	99.9986
UCSC_TFBS	MYOGNF1	23	45.098	0.654291	10516, 6284, 50855, 5164, 649, 9510, 2335, 7407, 7145, 65010, 148066, 9049, 4638, 3678, 3977, 1634, 7076, 5797, 5287, 4131, 8470, 9644, 4881	51	3860	8425	0.984329	1	0.736916	99.9998
UCSC_TFBS	LUN1	24	47.0588	0.655437	6284, 50855, 2632, 7538, 5164, 649, 7407, 7145, 728113, 55117, 65010, 9049, 388, 4811, 4638, 8803, 3678, 3977, 5797, 5287, 4131, 3075, 8470, 9644	51	4030	8425	0.983798	1	0.735512	99.9998
UCSC_TFBS	HEN1	28	54.902	0.67725	50855, 7538, 5164, 649, 9510, 55845, 7145, 728113, 65010, 4638, 9049, 3678, 5797, 5287, 4131, 4881, 10516, 26528, 4200, 7407, 4811, 356, 10788, 3977, 7076, 710, 8470, 9644	51	4734	8425	0.977079	1	0.746566	99.9999
UCSC_TFBS	RFX1	29	56.8627	0.680913	6284, 7538, 649, 9510, 63923, 2335, 7145, 65010, 9049, 4638, 3678, 5797, 5287, 4131, 1827, 4881, 10516, 26528, 7407, 8611, 4811, 356, 10788, 2882, 219623, 3977, 84937, 8470, 9644	51	4906	8425	0.976495	1	0.747668	99.9999
UCSC_TFBS	GR	24	47.0588	0.731766	10516, 6284, 50855, 26528, 2632, 5164, 649, 9510, 7407, 7145, 65010, 7980, 9049, 4638, 4811, 10788, 3678, 3977, 7076, 5797, 4131, 8470, 9644, 4881	51	4159	8425	0.953283	1	0.786471	100
UCSC_TFBS	XBP1	23	45.098	0.750517	6284, 50855, 26528, 5164, 649, 55845, 2335, 7145, 65010, 9049, 4638, 10788, 4060, 3678, 3977, 7076, 5797, 5287, 4131, 1827, 8470, 9644, 4881	51	4025	8425	0.943978	1	0.793295	100
SP_PIR_KEYWORDS	phosphoprotein	24	47.0588	0.759926	6284, 50855, 26528, 2632, 7538, 55845, 2335, 7407, 7145, 55117, 65010, 9049, 388, 4638, 8803, 10788, 3977, 5797, 5287, 84937, 4131, 8470, 9644, 4881	51	4221	8445	0.941511	1	0.999203	100
UCSC_TFBS	USF	27	52.9412	0.778732	50855, 5164, 649, 9510, 2335, 7145, 728113, 55117, 65010, 4638, 9049, 3678, 5287, 4131, 1827, 4881, 10516, 7407, 148066, 4811, 10788, 2882, 3977, 7076, 84937, 8470, 9644	51	4748	8425	0.939405	1	0.811688	100
UCSC_TFBS	AP1	27	52.9412	0.792718	50855, 7538, 4852, 649, 9510, 63923, 2335, 7145, 728113, 65010, 9049, 4638, 3678, 5797, 4131, 1827, 10516, 2632, 7407, 356, 2882, 10788, 3977, 7076, 84937, 8470, 9644	51	4776	8425	0.933897	1	0.820986	100
UCSC_TFBS	CHOP	21	41.1765	0.823194	10516, 6284, 50855, 7538, 4200, 649, 2335, 7407, 7145, 65010, 9049, 4638, 10788, 3678, 5797, 5287, 84937, 4131, 8470, 1827, 9644	51	3835	8425	0.904594	1	0.847782	100
UCSC_TFBS	NRSF	24	47.0588	0.839808	6284, 50855, 2632, 7538, 5164, 649, 63923, 2335, 7407, 7145, 65010, 8611, 2791, 9049, 4638, 10788, 2882, 3678, 7076, 5797, 84937, 4131, 4881, 9644	51	4381	8425	0.904977	1	0.859898	100
UCSC_TFBS	E2F	24	47.0588	0.935002	10516, 6284, 50855, 26528, 7538, 5164, 649, 9510, 55845, 63923, 2335, 65010, 388, 4638, 10788, 3678, 3977, 5797, 5287, 84937, 3075, 4131, 8470, 9644	51	4687	8425	0.845894	1	0.942935	100
UCSC_TFBS	MYCMAX	26	50.9804	0.94555	6284, 50855, 5164, 4852, 649, 9510, 2335, 7145, 728113, 55117, 65010, 4638, 388, 9049, 3678, 5797, 5287, 4131, 4881, 26528, 4811, 10788, 7076, 84937, 8470, 9644	51	5067	8425	0.847661	1	0.951734	100
UCSC_TFBS	PAX5	23	45.098	0.968532	50855, 26528, 7538, 5164, 649, 2335, 7407, 65010, 9049, 388, 4638, 4811, 4060, 3678, 3977, 7076, 5797, 5287, 84937, 4131, 1827, 9644, 4881	51	4723	8425	0.80447	1	0.972148	100
UCSC_TFBS	ELK1	20	39.2157	0.97222	50855, 7538, 5164, 649, 55845, 7407, 7145, 65010, 9049, 4638, 4811, 3678, 3977, 5797, 5287, 84937, 4131, 8470, 9644, 4881	51	4250	8425	0.777393	1	0.974983	100
Annotation Cluster 29	Enrichment Score: 0.4371253522410176
Category	Term	Count	%	PValue	Genes	List Total	Pop Hits	Pop Total	Fold Enrichment	Bonferroni	Benjamini	FDR
UCSC_TFBS	E47	33	64.7059	0.199276	6284, 50855, 7538, 5164, 4852, 649, 9510, 114908, 7145, 728113, 55117, 65010, 9049, 4638, 3678, 5797, 5287, 4131, 1827, 4881, 10516, 4200, 7407, 7980, 4811, 2882, 10788, 3977, 1634, 7076, 710, 8470, 9644	51	4810	8425	1.13336	1	0.605954	93.4594
UCSC_TFBS	LMO2COM	31	60.7843	0.314616	50855, 5164, 4852, 649, 114908, 2335, 7145, 55117, 65010, 4071, 9049, 4638, 3678, 5797, 5287, 4131, 1827, 10516, 2632, 7407, 7980, 4811, 2882, 10788, 3977, 1634, 7076, 84937, 710, 8470, 9644	51	4683	8425	1.09355	1	0.634834	99.0302
UCSC_TFBS	USF	27	52.9412	0.778732	50855, 5164, 649, 9510, 2335, 7145, 728113, 55117, 65010, 4638, 9049, 3678, 5287, 4131, 1827, 4881, 10516, 7407, 148066, 4811, 10788, 2882, 3977, 7076, 84937, 8470, 9644	51	4748	8425	0.939405	1	0.811688	100
Annotation Cluster 30	Enrichment Score: 0.40777308349547065
Category	Term	Count	%	PValue	Genes	List Total	Pop Hits	Pop Total	Fold Enrichment	Bonferroni	Benjamini	FDR
UCSC_TFBS	TBP	20	39.2157	0.136332	2632, 4852, 649, 9510, 63923, 7145, 55117, 65010, 8803, 10788, 3678, 219623, 3977, 1634, 5797, 84937, 4131, 8470, 1827, 9644	51	2519	8425	1.3116	1	0.615343	83.4464
UCSC_TFBS	NKX61	20	39.2157	0.587226	6284, 2632, 4200, 4852, 9510, 63923, 114908, 2335, 55117, 4638, 10788, 219623, 3977, 1634, 5797, 84937, 4131, 3075, 8470, 1827	51	3251	8425	1.01628	1	0.69819	99.9981
UCSC_TFBS	FOXO1	18	35.2941	0.746924	6284, 2632, 4200, 63923, 7145, 55117, 65010, 10788, 3678, 3977, 1634, 5797, 5287, 84937, 3075, 4131, 8470, 9644	51	3167	8425	0.93891	1	0.794153	100
Annotation Cluster 31	Enrichment Score: 0.4060209612437621
Category	Term	Count	%	PValue	Genes	List Total	Pop Hits	Pop Total	Fold Enrichment	Bonferroni	Benjamini	FDR
UP_TISSUE	Platelet	6	11.7647	0.0846766	4200, 4638, 10788, 7076, 7145, 4131	50	398	8283	2.49739	0.999504	0.781685	61.4835
GOTERM_MF_FAT	GO:0003779~actin binding	4	7.84314	0.178849	4638, 10788, 7145, 4131	45	206	6200	2.6753	1	0.945331	91.1108
GOTERM_MF_FAT	GO:0008092~cytoskeletal protein binding	5	9.80392	0.206372	4638, 10788, 7145, 4131, 8470	45	331	6200	2.08124	1	0.957022	94.152
GOTERM_CC_FAT	GO:0015629~actin cytoskeleton	3	5.88235	0.37692	10788, 8470, 9644	46	179	6172	2.24872	1	0.81312	99.5509
GOTERM_CC_FAT	GO:0005856~cytoskeleton	6	11.7647	0.608077	10788, 55845, 7145, 4131, 8470, 9644	46	714	6172	1.12751	1	0.956335	99.9978
SP_PIR_KEYWORDS	cytoplasm	9	17.6471	0.918996	6284, 50855, 26528, 9049, 55845, 5287, 7145, 8470, 9644	51	1952	8445	0.76347	1	0.999983	100
GOTERM_CC_FAT	GO:0043232~intracellular non-membrane-bounded organelle	8	15.6863	0.926199	26528, 5164, 10788, 55845, 7145, 4131, 8470, 9644	46	1437	6172	0.746967	1	0.999598	100
GOTERM_CC_FAT	GO:0043228~non-membrane-bounded organelle	8	15.6863	0.926199	26528, 5164, 10788, 55845, 7145, 4131, 8470, 9644	46	1437	6172	0.746967	1	0.999598	100
Annotation Cluster 32	Enrichment Score: 0.4002550221668283
Category	Term	Count	%	PValue	Genes	List Total	Pop Hits	Pop Total	Fold Enrichment	Bonferroni	Benjamini	FDR
GOTERM_BP_FAT	GO:0007276~gamete generation	3	5.88235	0.313875	8611, 26528, 9510	42	181	6549	2.58445	1	0.983818	99.6278
GOTERM_BP_FAT	GO:0019953~sexual reproduction	3	5.88235	0.378235	8611, 26528, 9510	42	209	6549	2.23821	1	0.993434	99.9138
GOTERM_BP_FAT	GO:0032504~multicellular organism reproduction	3	5.88235	0.459442	8611, 26528, 9510	42	246	6549	1.90157	1	0.99815	99.9892
GOTERM_BP_FAT	GO:0048609~reproductive process in a multicellular organism	3	5.88235	0.459442	8611, 26528, 9510	42	246	6549	1.90157	1	0.99815	99.9892
Annotation Cluster 33	Enrichment Score: 0.3860371572401351
Category	Term	Count	%	PValue	Genes	List Total	Pop Hits	Pop Total	Fold Enrichment	Bonferroni	Benjamini	FDR
UCSC_TFBS	MYB	27	52.9412	0.124855	50855, 7538, 4852, 649, 9510, 2335, 63923, 55117, 65010, 4638, 9049, 3678, 5797, 5287, 4131, 1827, 10516, 26528, 4200, 7407, 8611, 148066, 4811, 8803, 10788, 8470, 9644	51	3619	8425	1.23247	1	0.623943	80.5352
UCSC_TFBS	CHX10	21	41.1765	0.366716	10516, 50855, 2632, 4200, 4852, 649, 63923, 2335, 7145, 8611, 148066, 4638, 8803, 10788, 4060, 3678, 5797, 4131, 1827, 8470, 9644	51	3097	8425	1.12015	1	0.643282	99.6324
UCSC_TFBS	NF1	20	39.2157	0.406302	10516, 50855, 26528, 2632, 7538, 649, 2335, 7145, 65010, 8611, 9049, 4638, 8803, 10788, 3678, 5797, 58189, 4131, 8470, 9644	51	2990	8425	1.10499	1	0.651722	99.8335
UCSC_TFBS	PAX3	20	39.2157	0.76688	50855, 26528, 7538, 649, 2335, 7407, 7145, 65010, 8611, 9049, 4638, 8803, 10788, 2882, 3678, 7076, 5797, 4131, 8470, 9644	51	3547	8425	0.931469	1	0.802516	100
UCSC_TFBS	CHOP	21	41.1765	0.823194	10516, 6284, 50855, 7538, 4200, 649, 2335, 7407, 7145, 65010, 9049, 4638, 10788, 3678, 5797, 5287, 84937, 4131, 8470, 1827, 9644	51	3835	8425	0.904594	1	0.847782	100
Annotation Cluster 34	Enrichment Score: 0.33035434612383974
Category	Term	Count	%	PValue	Genes	List Total	Pop Hits	Pop Total	Fold Enrichment	Bonferroni	Benjamini	FDR
UCSC_TFBS	CEBP	39	76.4706	0.344952	6284, 50855, 7538, 5164, 9510, 649, 55845, 63923, 2335, 7145, 728113, 65010, 9049, 388, 4638, 3678, 5287, 5797, 58189, 4131, 3075, 1827, 4881, 10516, 26528, 2632, 4200, 7407, 8611, 8803, 356, 10788, 219623, 3977, 7076, 84937, 710, 8470, 9644	51	6096	8425	1.05686	1	0.65481	99.4435
UCSC_TFBS	P53	33	64.7059	0.509437	6284, 50855, 7538, 5164, 4852, 649, 9510, 55845, 63923, 2335, 7145, 728113, 65010, 9049, 388, 4638, 3678, 5797, 5287, 58189, 4131, 4881, 10516, 26528, 2632, 4200, 7407, 4811, 10788, 7076, 84937, 8470, 9644	51	5314	8425	1.02587	1	0.673451	99.984
UCSC_TFBS	YY1	35	68.6275	0.580881	6284, 50855, 7538, 9510, 649, 55845, 63923, 2335, 7145, 728113, 65010, 9049, 388, 4638, 3678, 5797, 5287, 4131, 3075, 1827, 4881, 10516, 26528, 2632, 7407, 4811, 8803, 10788, 219623, 3977, 7076, 84937, 710, 8470, 9644	51	5748	8425	1.00589	1	0.703195	99.9977
Annotation Cluster 35	Enrichment Score: 0.21886735855429323
Category	Term	Count	%	PValue	Genes	List Total	Pop Hits	Pop Total	Fold Enrichment	Bonferroni	Benjamini	FDR
GOTERM_BP_FAT	GO:0006793~phosphorus metabolic process	6	11.7647	0.247836	8611, 5164, 4638, 5797, 5287, 4881	42	541	6549	1.72934	1	0.969335	98.5431
GOTERM_BP_FAT	GO:0006796~phosphate metabolic process	6	11.7647	0.247836	8611, 5164, 4638, 5797, 5287, 4881	42	541	6549	1.72934	1	0.969335	98.5431
SP_PIR_KEYWORDS	nucleotide-binding	7	13.7255	0.473054	5164, 388, 4638, 8803, 7407, 5287, 4881	51	926	8445	1.25175	1	0.989305	99.9597
UP_SEQ_FEATURE	binding site:ATP	3	5.88235	0.522477	5164, 4638, 7407	51	293	8439	1.69424	1	0.999995	99.9959
GOTERM_BP_FAT	GO:0016310~phosphorylation	4	7.84314	0.539036	5164, 4638, 5287, 4881	42	448	6549	1.39222	1	0.999534	99.999
GOTERM_MF_FAT	GO:0001883~purine nucleoside binding	7	13.7255	0.595263	5164, 388, 4638, 8803, 7407, 5287, 4881	45	869	6200	1.10983	1	0.999781	99.9985
GOTERM_MF_FAT	GO:0001882~nucleoside binding	7	13.7255	0.601208	5164, 388, 4638, 8803, 7407, 5287, 4881	45	874	6200	1.10348	1	0.999707	99.9988
SP_PIR_KEYWORDS	atp-binding	5	9.80392	0.63709	5164, 4638, 8803, 7407, 5287	51	729	8445	1.13572	1	0.996145	99.9996
GOTERM_BP_FAT	GO:0006468~protein amino acid phosphorylation	3	5.88235	0.663052	5164, 4638, 4881	42	357	6549	1.31032	1	0.999966	100
SP_PIR_KEYWORDS	kinase	3	5.88235	0.669376	5164, 4638, 5287	51	383	8445	1.29704	1	0.996659	99.9999
GOTERM_MF_FAT	GO:0000166~nucleotide binding	9	17.6471	0.673059	26528, 4200, 5164, 388, 4638, 8803, 7407, 5287, 4881	45	1235	6200	1.00405	1	0.999817	99.9999
GOTERM_MF_FAT	GO:0005524~ATP binding	6	11.7647	0.684204	5164, 4638, 8803, 7407, 5287, 4881	45	797	6200	1.03722	1	0.999797	99.9999
GOTERM_MF_FAT	GO:0032559~adenyl ribonucleotide binding	6	11.7647	0.694177	5164, 4638, 8803, 7407, 5287, 4881	45	806	6200	1.02564	1	0.999772	100
GOTERM_MF_FAT	GO:0004672~protein kinase activity	3	5.88235	0.694484	5164, 4638, 4881	45	334	6200	1.23752	1	0.999688	100
GOTERM_MF_FAT	GO:0032553~ribonucleotide binding	7	13.7255	0.722999	5164, 388, 4638, 8803, 7407, 5287, 4881	45	987	6200	0.977147	1	0.999779	100
GOTERM_MF_FAT	GO:0032555~purine ribonucleotide binding	7	13.7255	0.722999	5164, 388, 4638, 8803, 7407, 5287, 4881	45	987	6200	0.977147	1	0.999779	100
GOTERM_MF_FAT	GO:0030554~adenyl nucleotide binding	6	11.7647	0.747789	5164, 4638, 8803, 7407, 5287, 4881	45	858	6200	0.963481	1	0.999835	100
GOTERM_MF_FAT	GO:0017076~purine nucleotide binding	7	13.7255	0.77094	5164, 388, 4638, 8803, 7407, 5287, 4881	45	1040	6200	0.92735	1	0.999876	100
SP_PIR_KEYWORDS	transferase	4	7.84314	0.831332	2632, 5164, 4638, 5287	51	747	8445	0.886684	1	0.999824	100
GOTERM_CC_FAT	GO:0005739~mitochondrion	4	7.84314	0.910658	4200, 5164, 8803, 7407	46	722	6172	0.743346	1	0.999518	100
Annotation Cluster 36	Enrichment Score: 0.14389894327120156
Category	Term	Count	%	PValue	Genes	List Total	Pop Hits	Pop Total	Fold Enrichment	Bonferroni	Benjamini	FDR
UP_SEQ_FEATURE	transit peptide:Mitochondrion	3	5.88235	0.581034	4200, 5164, 8803	51	326	8439	1.52274	1	0.999999	99.9993
SP_PIR_KEYWORDS	transit peptide	3	5.88235	0.592388	4200, 5164, 8803	51	333	8445	1.49179	1	0.994809	99.9982
SP_PIR_KEYWORDS	mitochondrion	3	5.88235	0.847699	4200, 5164, 8803	51	552	8445	0.899936	1	0.999862	100
GOTERM_CC_FAT	GO:0005739~mitochondrion	4	7.84314	0.910658	4200, 5164, 8803, 7407	46	722	6172	0.743346	1	0.999518	100
Annotation Cluster 37	Enrichment Score: 0.13077291219679457
Category	Term	Count	%	PValue	Genes	List Total	Pop Hits	Pop Total	Fold Enrichment	Bonferroni	Benjamini	FDR
SP_PIR_KEYWORDS	metal-binding	9	17.6471	0.56226	6284, 148066, 7538, 4200, 4638, 649, 9510, 7076, 84937	51	1354	8445	1.10066	1	0.994492	99.9958
GOTERM_MF_FAT	GO:0046872~metal ion binding	14	27.451	0.603956	10516, 6284, 7538, 4200, 649, 9510, 728113, 65010, 148066, 4638, 4811, 3678, 84937, 8470	45	1883	6200	1.02437	1	0.999593	99.9989
SP_PIR_KEYWORDS	zinc	6	11.7647	0.657865	148066, 7538, 649, 9510, 7076, 84937	51	930	8445	1.06831	1	0.996647	99.9998
GOTERM_MF_FAT	GO:0008270~zinc ion binding	6	11.7647	0.834499	148066, 7538, 649, 9510, 84937, 8470	45	962	6200	0.859321	1	0.999975	100
SP_PIR_KEYWORDS	zinc-finger	3	5.88235	0.920571	148066, 7538, 84937	51	682	8445	0.728394	1	0.999979	100
GOTERM_MF_FAT	GO:0046914~transition metal ion binding	6	11.7647	0.956756	148066, 7538, 649, 9510, 84937, 8470	45	1241	6200	0.666129	1	1	100

## Sheet: Functional cluster 3
Annotation Cluster 1	Enrichment Score: 1.8511002260635485
Category	Term	Count	%	PValue	Genes	List Total	Pop Hits	Pop Total	Fold Enrichment	Bonferroni	Benjamini	FDR
GOTERM_MF_FAT	GO:0008201~heparin binding	5	20.8333	6.57075e-05	7422, 5270, 1490, 6347, 7057	23	64	6200	21.0598	0.00850588	0.00850588	0.0764929
SP_PIR_KEYWORDS	heparin-binding	4	16.6667	0.000163274	7422, 5270, 1490, 7057	24	40	8445	35.1875	0.0190835	0.0190835	0.186698
GOTERM_MF_FAT	GO:0005539~glycosaminoglycan binding	5	20.8333	0.000165368	7422, 5270, 1490, 6347, 7057	23	81	6200	16.6398	0.0212701	0.0106922	0.192409
GOTERM_MF_FAT	GO:0001871~pattern binding	5	20.8333	0.000218168	7422, 5270, 1490, 6347, 7057	23	87	6200	15.4923	0.0279664	0.00941041	0.253772
GOTERM_MF_FAT	GO:0030247~polysaccharide binding	5	20.8333	0.000218168	7422, 5270, 1490, 6347, 7057	23	87	6200	15.4923	0.0279664	0.00941041	0.253772
GOTERM_CC_FAT	GO:0044421~extracellular region part	8	33.3333	0.000433923	7422, 5270, 1295, 1490, 7373, 6347, 10512, 7057	20	494	6172	4.99757	0.0457922	0.0457922	0.487511
SP_PIR_KEYWORDS	disulfide bond	10	41.6667	0.00133995	23022, 1192, 7422, 558, 1490, 7373, 6347, 10512, 4233, 7057	24	1079	8445	3.26112	0.146338	0.0760619	1.52281
GOTERM_BP_FAT	GO:0001936~regulation of endothelial cell proliferation	3	12.5	0.00217659	7422, 6347, 7057	23	21	6549	40.677	0.684896	0.250773	3.11398
GOTERM_CC_FAT	GO:0031012~extracellular matrix	5	20.8333	0.0025792	7422, 1295, 1490, 7373, 7057	20	195	6172	7.91282	0.243395	0.13017	2.86606
GOTERM_MF_FAT	GO:0030246~carbohydrate binding	5	20.8333	0.00326953	7422, 5270, 1490, 6347, 7057	23	179	6200	7.52975	0.346711	0.100966	3.74196
GOTERM_BP_FAT	GO:0001666~response to hypoxia	4	16.6667	0.00507431	824, 7422, 6347, 7057	23	106	6549	10.7449	0.932541	0.319669	7.11966
GOTERM_BP_FAT	GO:0070482~response to oxygen levels	4	16.6667	0.0057713	824, 7422, 6347, 7057	23	111	6549	10.2609	0.95347	0.318498	8.05986
SP_PIR_KEYWORDS	signal	10	41.6667	0.00582402	7422, 5270, 558, 1295, 1490, 7373, 6347, 10512, 4233, 7057	24	1330	8445	2.64568	0.498044	0.205266	6.46618
UP_SEQ_FEATURE	signal peptide	10	41.6667	0.0058521	7422, 5270, 558, 1295, 1490, 7373, 6347, 10512, 4233, 7057	24	1330	8439	2.6438	0.615839	0.615839	6.86273
SP_PIR_KEYWORDS	Secreted	7	29.1667	0.00879419	7422, 5270, 1295, 1490, 7373, 6347, 10512	24	690	8445	3.56975	0.647359	0.229392	9.61476
GOTERM_CC_FAT	GO:0005576~extracellular region	8	33.3333	0.00905576	7422, 5270, 1295, 1490, 7373, 6347, 10512, 7057	20	831	6172	2.97088	0.625618	0.21778	9.73608
GOTERM_BP_FAT	GO:0048514~blood vessel morphogenesis	4	16.6667	0.0105151	7422, 1490, 10512, 7057	23	138	6549	8.25331	0.996311	0.463399	14.2274
SP_PIR_KEYWORDS	cell adhesion	4	16.6667	0.0148637	1295, 1490, 7373, 7057	24	193	8445	7.29275	0.829169	0.255106	15.7501
GOTERM_BP_FAT	GO:0001568~blood vessel development	4	16.6667	0.0159351	7422, 1490, 10512, 7057	23	161	6549	7.07426	0.999799	0.508094	20.8016
GOTERM_CC_FAT	GO:0005578~proteinaceous extracellular matrix	4	16.6667	0.0165106	7422, 1295, 1490, 7373	20	179	6172	6.89609	0.834375	0.226524	17.0939
UP_SEQ_FEATURE	disulfide bond	8	33.3333	0.0166737	23022, 1192, 7422, 558, 1490, 6347, 10512, 7057	24	1031	8439	2.72842	0.935477	0.745986	18.4272
GOTERM_BP_FAT	GO:0001944~vasculature development	4	16.6667	0.0167392	7422, 1490, 10512, 7057	23	164	6549	6.94486	0.99987	0.49753	21.736
UP_SEQ_FEATURE	glycosylation site:N-linked (GlcNAc...)	10	41.6667	0.0189403	7422, 5243, 5270, 558, 1490, 7373, 6347, 10512, 4233, 7057	24	1592	8439	2.2087	0.955705	0.646177	20.6758
GOTERM_CC_FAT	GO:0005615~extracellular space	5	20.8333	0.0194292	7422, 5270, 6347, 10512, 7057	20	347	6172	4.44669	0.879848	0.209781	19.8224
GOTERM_CC_FAT	GO:0044420~extracellular matrix part	3	12.5	0.0234625	7422, 1295, 7373	20	78	6172	11.8692	0.923015	0.207929	23.4585
SP_PIR_KEYWORDS	glycoprotein	10	41.6667	0.0269709	7422, 5243, 5270, 558, 1490, 7373, 6347, 10512, 4233, 7057	24	1687	8445	2.0858	0.960295	0.369282	26.868
GOTERM_BP_FAT	GO:0007155~cell adhesion	5	20.8333	0.0285864	1295, 1490, 7373, 6347, 7057	23	355	6549	4.01041	1	0.617384	34.366
GOTERM_BP_FAT	GO:0022610~biological adhesion	5	20.8333	0.0288472	1295, 1490, 7373, 6347, 7057	23	356	6549	3.99915	1	0.598513	34.6213
GOTERM_BP_FAT	GO:0001525~angiogenesis	3	12.5	0.0398473	7422, 1490, 7057	23	95	6549	8.99176	1	0.697991	44.5872
GOTERM_BP_FAT	GO:0030334~regulation of cell migration	3	12.5	0.052761	7422, 5270, 7057	23	111	6549	7.69565	1	0.779532	54.4769
SP_PIR_KEYWORDS	extracellular matrix	3	12.5	0.0557192	1295, 1490, 7373	24	141	8445	7.4867	0.998847	0.528427	48.1142
GOTERM_BP_FAT	GO:0040012~regulation of locomotion	3	12.5	0.063303	7422, 5270, 7057	23	123	6549	6.94486	1	0.823243	61.304
GOTERM_BP_FAT	GO:0051270~regulation of cell motion	3	12.5	0.0642122	7422, 5270, 7057	23	124	6549	6.88885	1	0.812685	61.8457
GOTERM_BP_FAT	GO:0006955~immune response	4	16.6667	0.0687454	7422, 6347, 10512, 7057	23	286	6549	3.98237	1	0.820183	64.443
GOTERM_BP_FAT	GO:0006916~anti-apoptosis	3	12.5	0.0793508	7422, 6347, 7057	23	140	6549	6.10155	1	0.851199	69.8903
GOTERM_BP_FAT	GO:0010647~positive regulation of cell communication	3	12.5	0.151073	7422, 6347, 7057	23	206	6549	4.14669	1	0.964514	90.7249
GOTERM_BP_FAT	GO:0043066~negative regulation of apoptosis	3	12.5	0.184601	7422, 6347, 7057	23	234	6549	3.6505	1	0.976	94.833
GOTERM_BP_FAT	GO:0043069~negative regulation of programmed cell death	3	12.5	0.187042	7422, 6347, 7057	23	236	6549	3.61957	1	0.974225	95.0531
GOTERM_BP_FAT	GO:0060548~negative regulation of cell death	3	12.5	0.188265	7422, 6347, 7057	23	237	6549	3.60429	1	0.968401	95.16
GOTERM_BP_FAT	GO:0042127~regulation of cell proliferation	3	12.5	0.488009	7422, 6347, 7057	23	481	6549	1.77592	1	0.998912	99.994
GOTERM_BP_FAT	GO:0042981~regulation of apoptosis	3	12.5	0.501448	7422, 6347, 7057	23	493	6549	1.73269	1	0.999051	99.9959
GOTERM_BP_FAT	GO:0043067~regulation of programmed cell death	3	12.5	0.504776	7422, 6347, 7057	23	496	6549	1.72221	1	0.99899	99.9963
GOTERM_BP_FAT	GO:0010941~regulation of cell death	3	12.5	0.508091	7422, 6347, 7057	23	499	6549	1.71186	1	0.998926	99.9966
Annotation Cluster 2	Enrichment Score: 1.6672660291121848
Category	Term	Count	%	PValue	Genes	List Total	Pop Hits	Pop Total	Fold Enrichment	Bonferroni	Benjamini	FDR
SP_PIR_KEYWORDS	acetylated amino end	3	12.5	0.0136924	824, 70, 71	24	66	8445	15.9943	0.803456	0.277743	14.5966
GOTERM_BP_FAT	GO:0051146~striated muscle cell differentiation	3	12.5	0.0158945	824, 70, 71	23	58	6549	14.7279	0.999795	0.537902	20.7542
GOTERM_CC_FAT	GO:0005625~soluble fraction	4	16.6667	0.0207208	824, 1192, 70, 71	20	195	6172	6.33026	0.895791	0.20239	21.0035
GOTERM_BP_FAT	GO:0042692~muscle cell differentiation	3	12.5	0.0283959	824, 70, 71	23	79	6549	10.8129	1	0.638626	34.1788
GOTERM_CC_FAT	GO:0000267~cell fraction	6	25	0.0359982	824, 1192, 5243, 70, 71, 4233	20	622	6172	2.97685	0.980927	0.246346	33.8216
Annotation Cluster 3	Enrichment Score: 1.536630763291244
Category	Term	Count	%	PValue	Genes	List Total	Pop Hits	Pop Total	Fold Enrichment	Bonferroni	Benjamini	FDR
GOTERM_CC_FAT	GO:0016323~basolateral plasma membrane	4	16.6667	0.00553294	5243, 2274, 55679, 4233	20	120	6172	10.2867	0.450758	0.181055	6.05624
GOTERM_CC_FAT	GO:0005925~focal adhesion	3	12.5	0.0142907	5243, 2274, 55679	20	60	6172	15.43	0.788712	0.267218	14.9622
GOTERM_CC_FAT	GO:0005924~cell-substrate adherens junction	3	12.5	0.0156821	5243, 2274, 55679	20	63	6172	14.6952	0.818607	0.247621	16.3041
GOTERM_CC_FAT	GO:0030055~cell-substrate junction	3	12.5	0.0181256	5243, 2274, 55679	20	68	6172	13.6147	0.861311	0.218813	18.614
GOTERM_CC_FAT	GO:0005912~adherens junction	3	12.5	0.0344789	5243, 2274, 55679	20	96	6172	9.64375	0.977392	0.252854	32.6376
GOTERM_CC_FAT	GO:0070161~anchoring junction	3	12.5	0.0406142	5243, 2274, 55679	20	105	6172	8.81714	0.988643	0.258089	37.3033
GOTERM_CC_FAT	GO:0044459~plasma membrane part	7	29.1667	0.0890376	5243, 2274, 55679, 558, 130340, 4233, 7057	20	1050	6172	2.05733	0.999958	0.447021	65.0075
GOTERM_CC_FAT	GO:0030054~cell junction	3	12.5	0.181736	5243, 2274, 55679	20	253	6172	3.65929	1	0.64353	89.5485
Annotation Cluster 4	Enrichment Score: 1.4183506463991282
Category	Term	Count	%	PValue	Genes	List Total	Pop Hits	Pop Total	Fold Enrichment	Bonferroni	Benjamini	FDR
GOTERM_BP_FAT	GO:0006928~cell motion	6	25	0.00172386	1490, 6347, 71, 10512, 4233, 7057	23	271	6549	6.30419	0.599256	0.366957	2.47381
GOTERM_BP_FAT	GO:0016477~cell migration	5	20.8333	0.00203788	1490, 6347, 10512, 4233, 7057	23	166	6549	8.57648	0.660805	0.302598	2.91826
GOTERM_BP_FAT	GO:0048870~cell motility	5	20.8333	0.00232086	1490, 6347, 10512, 4233, 7057	23	172	6549	8.2773	0.708141	0.21831	3.31716
GOTERM_BP_FAT	GO:0051674~localization of cell	5	20.8333	0.00232086	1490, 6347, 10512, 4233, 7057	23	172	6549	8.2773	0.708141	0.21831	3.31716
GOTERM_BP_FAT	GO:0006468~protein amino acid phosphorylation	4	16.6667	0.115038	558, 6347, 4233, 7057	23	357	6549	3.19035	1	0.925044	83.0396
GOTERM_BP_FAT	GO:0007243~protein kinase cascade	3	12.5	0.159328	6347, 4233, 7057	23	213	6549	4.01041	1	0.966853	91.9517
GOTERM_BP_FAT	GO:0016310~phosphorylation	4	16.6667	0.187532	558, 6347, 4233, 7057	23	448	6549	2.54231	1	0.971293	95.0961
GOTERM_BP_FAT	GO:0007242~intracellular signaling cascade	5	20.8333	0.213694	2274, 1490, 6347, 4233, 7057	23	715	6549	1.99118	1	0.976425	96.951
UP_SEQ_FEATURE	mutagenesis site	6	25	0.244009	23089, 1192, 558, 1382, 6347, 7057	24	1244	8439	1.69594	1	0.999989	96.6236
GOTERM_BP_FAT	GO:0006793~phosphorus metabolic process	4	16.6667	0.271569	558, 6347, 4233, 7057	23	541	6549	2.10528	1	0.983361	98.9951
GOTERM_BP_FAT	GO:0006796~phosphate metabolic process	4	16.6667	0.271569	558, 6347, 4233, 7057	23	541	6549	2.10528	1	0.983361	98.9951
Annotation Cluster 5	Enrichment Score: 1.2728140119234812
Category	Term	Count	%	PValue	Genes	List Total	Pop Hits	Pop Total	Fold Enrichment	Bonferroni	Benjamini	FDR
UCSC_TFBS	SOX5	16	66.6667	0.0168406	23022, 5243, 1295, 1382, 6347, 10512, 7422, 2274, 5270, 55679, 1490, 70, 7373, 130340, 4233, 389136	23	3660	8425	1.60133	0.948809	0.236773	18.7968
UCSC_TFBS	PBX1	17	70.8333	0.0385399	23022, 1192, 5243, 1295, 1382, 10512, 7913, 7422, 5270, 558, 55679, 1490, 70, 7373, 130340, 4233, 389136	23	4369	8425	1.42531	0.99897	0.290996	38.2346
UCSC_TFBS	TATA	16	66.6667	0.0534182	824, 23022, 5243, 1295, 1382, 6347, 10512, 7913, 5270, 55679, 1490, 70, 7373, 130340, 4233, 389136	23	4113	8425	1.42496	0.999933	0.299401	48.9835
UCSC_TFBS	SOX9	12	50	0.233769	23022, 5243, 55679, 5270, 1295, 1382, 70, 7373, 130340, 10512, 4233, 389136	23	3387	8425	1.2978	1	0.506397	96.1779
Annotation Cluster 6	Enrichment Score: 1.242036711621907
Category	Term	Count	%	PValue	Genes	List Total	Pop Hits	Pop Total	Fold Enrichment	Bonferroni	Benjamini	FDR
UCSC_TFBS	ARP1	17	70.8333	0.00970358	824, 23022, 1192, 1295, 1382, 6347, 10512, 22984, 7422, 2274, 558, 55679, 1490, 7373, 71, 130340, 4233	23	3858	8425	1.61409	0.818485	0.433799	11.2673
UCSC_TFBS	NFKB	15	62.5	0.100531	23022, 1192, 1295, 6347, 10512, 22984, 7422, 2274, 558, 55679, 1490, 7373, 71, 130340, 4233	23	4025	8425	1.36511	1	0.411248	72.7168
UCSC_TFBS	PAX2	16	66.6667	0.192602	824, 23022, 1192, 1295, 10512, 22984, 7422, 2274, 558, 55679, 1490, 70, 7373, 71, 4233, 389136	23	4778	8425	1.22664	1	0.481506	92.7399
Annotation Cluster 7	Enrichment Score: 1.0801780535613323
Category	Term	Count	%	PValue	Genes	List Total	Pop Hits	Pop Total	Fold Enrichment	Bonferroni	Benjamini	FDR
UCSC_TFBS	NGFIC	12	50	0.0285992	23022, 1192, 7422, 5243, 558, 1295, 1490, 7373, 10512, 4233, 389136, 22984	23	2424	8425	1.81339	0.993767	0.245803	29.9334
UCSC_TFBS	IRF7	14	58.3333	0.067796	23022, 5243, 1295, 6347, 10512, 22984, 7422, 2274, 558, 1490, 70, 7373, 4233, 7057	23	3462	8425	1.4813	0.999995	0.336032	57.7118
UCSC_TFBS	AHRARNT	14	58.3333	0.29642	23022, 1192, 5243, 10512, 22984, 7422, 2274, 558, 55679, 1490, 70, 7373, 4233, 7057	23	4305	8425	1.19123	1	0.515108	98.6568
Annotation Cluster 8	Enrichment Score: 1.0801778594965523
Category	Term	Count	%	PValue	Genes	List Total	Pop Hits	Pop Total	Fold Enrichment	Bonferroni	Benjamini	FDR
SP_PIR_KEYWORDS	Immunoglobulin domain	3	12.5	0.0726832	23022, 558, 10512	24	164	8445	6.43674	0.999864	0.554911	57.8356
INTERPRO	IPR007110:Immunoglobulin-like	3	12.5	0.0816219	23022, 558, 10512	24	161	7752	6.01863	0.998899	0.998899	59.554
INTERPRO	IPR013783:Immunoglobulin-like fold	3	12.5	0.0968781	23022, 558, 10512	24	178	7752	5.44382	0.999712	0.983023	66.152
Annotation Cluster 9	Enrichment Score: 1.053100161786766
Category	Term	Count	%	PValue	Genes	List Total	Pop Hits	Pop Total	Fold Enrichment	Bonferroni	Benjamini	FDR
GOTERM_BP_FAT	GO:0007169~transmembrane receptor protein tyrosine kinase signaling pathway	5	20.8333	0.00120476	7422, 558, 1490, 6347, 4233	23	144	6549	9.88678	0.472131	0.472131	1.73494
GOTERM_BP_FAT	GO:0007167~enzyme linked receptor protein signaling pathway	5	20.8333	0.00493522	7422, 558, 1490, 6347, 4233	23	212	6549	6.71555	0.927353	0.354044	6.93097
KEGG_PATHWAY	hsa04060:Cytokine-cytokine receptor interaction	3	12.5	0.0423558	7422, 6347, 4233	10	105	2795	7.98571	0.760261	0.510369	31.4606
GOTERM_BP_FAT	GO:0006468~protein amino acid phosphorylation	4	16.6667	0.115038	558, 6347, 4233, 7057	23	357	6549	3.19035	1	0.925044	83.0396
GOTERM_BP_FAT	GO:0007166~cell surface receptor linked signal transduction	5	20.8333	0.177775	7422, 558, 1490, 6347, 4233	23	664	6549	2.14412	1	0.975403	94.1682
GOTERM_BP_FAT	GO:0016310~phosphorylation	4	16.6667	0.187532	558, 6347, 4233, 7057	23	448	6549	2.54231	1	0.971293	95.0961
GOTERM_BP_FAT	GO:0048609~reproductive process in a multicellular organism	3	12.5	0.199324	7422, 6347, 4233	23	246	6549	3.47243	1	0.971851	96.034
GOTERM_BP_FAT	GO:0032504~multicellular organism reproduction	3	12.5	0.199324	7422, 6347, 4233	23	246	6549	3.47243	1	0.971851	96.034
UP_SEQ_FEATURE	mutagenesis site	6	25	0.244009	23089, 1192, 558, 1382, 6347, 7057	24	1244	8439	1.69594	1	0.999989	96.6236
GOTERM_BP_FAT	GO:0006793~phosphorus metabolic process	4	16.6667	0.271569	558, 6347, 4233, 7057	23	541	6549	2.10528	1	0.983361	98.9951
GOTERM_BP_FAT	GO:0006796~phosphate metabolic process	4	16.6667	0.271569	558, 6347, 4233, 7057	23	541	6549	2.10528	1	0.983361	98.9951
GOTERM_MF_FAT	GO:0004672~protein kinase activity	3	12.5	0.333894	558, 6347, 4233	23	334	6200	2.42124	1	0.994918	99.1188
Annotation Cluster 10	Enrichment Score: 1.0055044500328953
Category	Term	Count	%	PValue	Genes	List Total	Pop Hits	Pop Total	Fold Enrichment	Bonferroni	Benjamini	FDR
GOTERM_CC_FAT	GO:0005625~soluble fraction	4	16.6667	0.0207208	824, 1192, 70, 71	20	195	6172	6.33026	0.895791	0.20239	21.0035
UCSC_TFBS	MAZR	9	37.5	0.0781543	824, 7913, 1192, 7422, 558, 1382, 70, 7373, 71	23	1801	8425	1.8305	0.999999	0.359197	63.1254
SP_PIR_KEYWORDS	acetylation	6	25	0.594467	7913, 1192, 7422, 70, 71, 22984	24	1860	8445	1.13508	1	0.995132	99.9967
Annotation Cluster 11	Enrichment Score: 0.9519860819176829
Category	Term	Count	%	PValue	Genes	List Total	Pop Hits	Pop Total	Fold Enrichment	Bonferroni	Benjamini	FDR
UCSC_TFBS	GRE	17	70.8333	0.0105508	824, 23022, 1192, 1295, 10512, 22984, 7422, 2274, 5270, 558, 55679, 1490, 70, 7373, 71, 4233, 7057	23	3886	8425	1.60246	0.843735	0.371269	12.1936
UCSC_TFBS	SEF1	15	62.5	0.122486	824, 23022, 1295, 6347, 10512, 22984, 7422, 2274, 5270, 558, 55679, 70, 7373, 71, 4233	23	4128	8425	1.33105	1	0.412434	79.8478
UCSC_TFBS	PAX2	16	66.6667	0.192602	824, 23022, 1192, 1295, 10512, 22984, 7422, 2274, 558, 55679, 1490, 70, 7373, 71, 4233, 389136	23	4778	8425	1.22664	1	0.481506	92.7399
UCSC_TFBS	PPARG	18	75	0.625205	824, 23022, 1192, 1295, 1382, 10512, 22984, 7422, 2274, 5270, 558, 55679, 70, 7373, 71, 4233, 389136, 7057	23	6526	8425	1.01034	1	0.727759	99.9994
Annotation Cluster 12	Enrichment Score: 0.9345247603508049
Category	Term	Count	%	PValue	Genes	List Total	Pop Hits	Pop Total	Fold Enrichment	Bonferroni	Benjamini	FDR
UCSC_TFBS	CEBP	22	91.6667	0.00756135	824, 23022, 1192, 5243, 1295, 6347, 10512, 22984, 7913, 7422, 2274, 5270, 558, 55679, 1490, 70, 7373, 71, 130340, 389136, 4233, 7057	23	6096	8425	1.32196	0.735063	0.48528	8.88527
UCSC_TFBS	PAX4	20	83.3333	0.14595	824, 23022, 1192, 5243, 1295, 6347, 10512, 22984, 7422, 5270, 558, 55679, 1490, 70, 7373, 71, 130340, 389136, 4233, 7057	23	6264	8425	1.16955	1	0.444245	85.5451
UCSC_TFBS	EVI1	20	83.3333	0.178959	824, 23022, 1192, 5243, 1295, 10512, 22984, 7913, 7422, 2274, 5270, 558, 55679, 1490, 70, 7373, 71, 130340, 389136, 4233	23	6372	8425	1.14973	1	0.478514	91.0843
UCSC_TFBS	41183	21	87.5	0.208805	824, 23022, 1192, 5243, 1295, 10512, 22984, 7913, 7422, 2274, 5270, 558, 55679, 1490, 70, 7373, 71, 130340, 389136, 4233, 7057	23	6893	8425	1.11597	1	0.483706	94.3375
UCSC_TFBS	AREB6	19	79.1667	0.515321	824, 23022, 1192, 5243, 1295, 10512, 22984, 7422, 5270, 558, 55679, 1490, 70, 7373, 71, 130340, 389136, 4233, 7057	23	6691	8425	1.04017	1	0.655307	99.9861
Annotation Cluster 13	Enrichment Score: 0.9201542857969651
Category	Term	Count	%	PValue	Genes	List Total	Pop Hits	Pop Total	Fold Enrichment	Bonferroni	Benjamini	FDR
UCSC_TFBS	ZIC1	8	33.3333	0.0213771	23022, 1192, 55679, 558, 1295, 1490, 22984, 7057	23	1134	8425	2.58416	0.977213	0.252401	23.2728
UCSC_TFBS	MYB	13	54.1667	0.187944	23022, 1192, 5243, 1295, 22984, 558, 55679, 1490, 71, 130340, 4233, 389136, 7057	23	3619	8425	1.31582	1	0.478257	92.2094
UCSC_TFBS	CMYB	11	45.8333	0.432077	7913, 1192, 7422, 55679, 558, 1295, 1490, 130340, 389136, 22984, 7057	23	3497	8425	1.15223	1	0.607042	99.9028
Annotation Cluster 14	Enrichment Score: 0.8933170909876349
Category	Term	Count	%	PValue	Genes	List Total	Pop Hits	Pop Total	Fold Enrichment	Bonferroni	Benjamini	FDR
GOTERM_BP_FAT	GO:0010033~response to organic substance	6	25	0.0227404	7913, 1192, 2274, 70, 6347, 7057	23	501	6549	3.41005	0.999995	0.581395	28.3922
GOTERM_BP_FAT	GO:0007242~intracellular signaling cascade	5	20.8333	0.213694	2274, 1490, 6347, 4233, 7057	23	715	6549	1.99118	1	0.976425	96.951
GOTERM_BP_FAT	GO:0009725~response to hormone stimulus	3	12.5	0.220446	2274, 6347, 7057	23	263	6549	3.24797	1	0.976973	97.3098
GOTERM_BP_FAT	GO:0009719~response to endogenous stimulus	3	12.5	0.249366	2274, 6347, 7057	23	286	6549	2.98677	1	0.977643	98.4461
Annotation Cluster 15	Enrichment Score: 0.8726002166975203
Category	Term	Count	%	PValue	Genes	List Total	Pop Hits	Pop Total	Fold Enrichment	Bonferroni	Benjamini	FDR
GOTERM_CC_FAT	GO:0005886~plasma membrane	10	41.6667	0.0343618	824, 1192, 5243, 2274, 55679, 558, 1490, 130340, 4233, 7057	20	1590	6172	1.94088	0.977094	0.269988	32.5456
GOTERM_CC_FAT	GO:0044459~plasma membrane part	7	29.1667	0.0890376	5243, 2274, 55679, 558, 130340, 4233, 7057	20	1050	6172	2.05733	0.999958	0.447021	65.0075
SP_PIR_KEYWORDS	membrane	7	29.1667	0.788043	824, 1192, 5243, 55679, 558, 130340, 4233	24	2683	8445	0.918049	1	0.999339	100
Annotation Cluster 16	Enrichment Score: 0.840439863230788
Category	Term	Count	%	PValue	Genes	List Total	Pop Hits	Pop Total	Fold Enrichment	Bonferroni	Benjamini	FDR
UCSC_TFBS	GATA6	8	33.3333	0.0391211	824, 23022, 5243, 558, 1490, 7373, 10512, 4233	23	1281	8425	2.28761	0.999073	0.282913	38.6907
UCSC_TFBS	ZID	14	58.3333	0.153912	824, 23022, 5243, 1295, 1382, 10512, 7422, 558, 1490, 70, 7373, 71, 4233, 7057	23	3875	8425	1.32342	1	0.456288	87.1131
UCSC_TFBS	COMP1	12	50	0.50003	23022, 5243, 2274, 55679, 558, 1295, 1490, 70, 7373, 71, 10512, 4233	23	4024	8425	1.09236	1	0.64543	99.9796
Annotation Cluster 17	Enrichment Score: 0.8096152585904091
Category	Term	Count	%	PValue	Genes	List Total	Pop Hits	Pop Total	Fold Enrichment	Bonferroni	Benjamini	FDR
UCSC_TFBS	MYOD	17	70.8333	0.0507076	824, 23022, 1192, 5243, 1295, 1382, 10512, 22984, 7913, 7422, 2274, 558, 55679, 7373, 71, 4233, 389136	23	4486	8425	1.38814	0.999889	0.295494	47.1634
UCSC_TFBS	ER	14	58.3333	0.208128	824, 23022, 1192, 1382, 10512, 22984, 7913, 7422, 2274, 558, 1490, 7373, 71, 4233	23	4058	8425	1.26374	1	0.488016	94.2778
UCSC_TFBS	HOX13	12	50	0.35298	824, 7913, 1192, 7422, 2274, 55679, 558, 1382, 7373, 71, 10512, 4233	23	3691	8425	1.19091	1	0.547813	99.5192
Annotation Cluster 18	Enrichment Score: 0.7030985105592154
Category	Term	Count	%	PValue	Genes	List Total	Pop Hits	Pop Total	Fold Enrichment	Bonferroni	Benjamini	FDR
SP_PIR_KEYWORDS	Secreted	7	29.1667	0.00879419	7422, 5270, 1295, 1490, 7373, 6347, 10512	24	690	8445	3.56975	0.647359	0.229392	9.61476
UCSC_TFBS	IK2	8	33.3333	0.409659	824, 23022, 7422, 5270, 1295, 1490, 70, 7373	23	2333	8425	1.25608	1	0.595159	99.8437
UCSC_TFBS	HSF1	7	29.1667	0.595379	824, 23022, 7422, 5270, 1295, 7373, 10512	23	2328	8425	1.10143	1	0.709757	99.9985
UCSC_TFBS	FAC1	10	41.6667	0.718114	824, 23022, 7422, 2274, 5270, 1295, 1490, 7373, 10512, 4233	23	3776	8425	0.970086	1	0.785372	100
Annotation Cluster 19	Enrichment Score: 0.681555299608783
Category	Term	Count	%	PValue	Genes	List Total	Pop Hits	Pop Total	Fold Enrichment	Bonferroni	Benjamini	FDR
UCSC_TFBS	NFAT	15	62.5	0.0118687	824, 23022, 1192, 5243, 1295, 10512, 22984, 7913, 7422, 2274, 1490, 7373, 4233, 389136, 7057	23	3171	8425	1.73275	0.876244	0.341564	13.6166
UCSC_TFBS	AP1	19	79.1667	0.0124872	824, 23022, 1192, 5243, 1295, 1382, 10512, 22984, 7913, 7422, 5270, 558, 55679, 1490, 70, 7373, 4233, 389136, 7057	23	4776	8425	1.45724	0.889089	0.306846	14.2772
UCSC_TFBS	FREAC7	16	66.6667	0.0143815	23022, 5243, 1295, 10512, 22984, 7913, 7422, 2274, 5270, 558, 1490, 70, 7373, 130340, 4233, 389136	23	3605	8425	1.62576	0.920741	0.271581	16.2714
UCSC_TFBS	BACH1	17	70.8333	0.0156682	824, 23022, 1192, 5243, 1295, 1382, 10512, 7422, 2274, 558, 55679, 70, 7373, 71, 130340, 4233, 389136	23	4023	8425	1.54789	0.936938	0.264401	17.6017
UCSC_TFBS	POU3F2	18	75	0.0157714	824, 23022, 5243, 1295, 10512, 22984, 7913, 7422, 2274, 5270, 558, 1490, 7373, 71, 130340, 4233, 389136, 7057	23	4432	8425	1.4877	0.938085	0.242854	17.7075
UCSC_TFBS	LHX3	13	54.1667	0.0179786	824, 23022, 5243, 1295, 10512, 7913, 7422, 2274, 5270, 1490, 7373, 130340, 4233	23	2607	8425	1.8266	0.958201	0.232466	19.9416
UCSC_TFBS	BACH2	15	62.5	0.0260602	824, 23022, 1192, 5243, 1295, 1382, 10512, 7422, 558, 55679, 1490, 70, 7373, 4233, 389136	23	3443	8425	1.59587	0.990157	0.265134	27.6549
UCSC_TFBS	CART1	15	62.5	0.0283859	824, 23022, 5243, 1295, 10512, 22984, 5270, 558, 70, 7373, 71, 130340, 4233, 389136, 7057	23	3475	8425	1.58117	0.993522	0.270183	29.7445
UCSC_TFBS	MEIS1BHOXA9	16	66.6667	0.0285466	824, 23022, 1192, 5243, 1295, 1382, 10512, 22984, 7913, 2274, 5270, 1490, 70, 7373, 4233, 389136	23	3855	8425	1.52033	0.993707	0.257801	29.8868
UCSC_TFBS	NGFIC	12	50	0.0285992	23022, 1192, 7422, 5243, 558, 1295, 1490, 7373, 10512, 4233, 389136, 22984	23	2424	8425	1.81339	0.993767	0.245803	29.9334
UCSC_TFBS	GATA	15	62.5	0.0286879	824, 23022, 1192, 5243, 1295, 1382, 6347, 10512, 22984, 2274, 558, 70, 7373, 4233, 389136	23	3479	8425	1.57935	0.993865	0.235165	30.0118
UCSC_TFBS	GATA6	8	33.3333	0.0391211	824, 23022, 5243, 558, 1490, 7373, 10512, 4233	23	1281	8425	2.28761	0.999073	0.282913	38.6907
UCSC_TFBS	STAT1	14	58.3333	0.0399035	824, 23022, 1192, 5243, 22984, 7913, 7422, 2274, 558, 55679, 1490, 7373, 4233, 389136	23	3240	8425	1.5828	0.999196	0.276692	39.2999
UCSC_TFBS	NKX61	14	58.3333	0.0410316	824, 23022, 1192, 5243, 1295, 10512, 22984, 7913, 7422, 558, 70, 7373, 4233, 389136	23	3251	8425	1.57744	0.999346	0.272967	40.1686
UCSC_TFBS	S8	14	58.3333	0.0471624	23022, 1192, 5243, 1295, 6347, 10512, 7913, 7422, 5270, 70, 7373, 4233, 389136, 7057	23	3307	8425	1.55073	0.999787	0.296907	44.6928
UCSC_TFBS	ROAZ	15	62.5	0.0487674	23022, 1192, 5243, 1295, 10512, 22984, 7913, 7422, 558, 55679, 70, 7373, 4233, 389136, 7057	23	3691	8425	1.48864	0.999841	0.295296	45.8242
UCSC_TFBS	MYOD	17	70.8333	0.0507076	824, 23022, 1192, 5243, 1295, 1382, 10512, 22984, 7913, 7422, 2274, 558, 55679, 7373, 71, 4233, 389136	23	4486	8425	1.38814	0.999889	0.295494	47.1634
UCSC_TFBS	BRN2	15	62.5	0.0626543	824, 23022, 5243, 1295, 1382, 10512, 7422, 5270, 55679, 7373, 71, 130340, 4233, 389136, 7057	23	3800	8425	1.44594	0.999988	0.332619	54.7619
UCSC_TFBS	FREAC2	11	45.8333	0.0687603	23022, 7422, 5243, 2274, 5270, 558, 1295, 1490, 70, 7373, 4233	23	2409	8425	1.67262	0.999996	0.331122	58.245
UCSC_TFBS	BRACH	16	66.6667	0.0883566	23022, 1192, 5243, 1295, 1382, 10512, 22984, 7422, 2274, 5270, 558, 70, 7373, 4233, 389136, 7057	23	4347	8425	1.34826	1	0.387719	67.8283
UCSC_TFBS	MSX1	13	54.1667	0.0957186	824, 23022, 1192, 5243, 1295, 22984, 558, 5270, 70, 7373, 71, 4233, 389136	23	3256	8425	1.46252	1	0.404212	70.8725
UCSC_TFBS	MEIS1	14	58.3333	0.108875	23022, 1192, 5243, 1295, 10512, 22984, 7913, 7422, 2274, 558, 5270, 7373, 130340, 4233	23	3688	8425	1.39053	1	0.411896	75.6628
UCSC_TFBS	AP4	18	75	0.108978	824, 23022, 1192, 5243, 1295, 10512, 22984, 7913, 7422, 2274, 5270, 55679, 1490, 70, 7373, 71, 4233, 389136	23	5259	8425	1.25375	1	0.404144	75.6971
UCSC_TFBS	P53	18	75	0.121078	23022, 1192, 5243, 1295, 1382, 6347, 10512, 22984, 7913, 7422, 2274, 558, 55679, 1490, 7373, 71, 4233, 389136	23	5314	8425	1.24077	1	0.415938	79.4479
UCSC_TFBS	NKX25	17	70.8333	0.125121	23022, 1192, 5243, 1295, 1382, 10512, 22984, 7913, 7422, 2274, 5270, 558, 70, 7373, 130340, 4233, 389136	23	4924	8425	1.26466	1	0.412359	80.5772
UCSC_TFBS	TST1	13	54.1667	0.130474	23022, 1192, 5243, 1295, 1382, 10512, 22984, 7913, 7422, 5270, 1490, 4233, 389136	23	3412	8425	1.39565	1	0.419402	81.9852
UCSC_TFBS	MEIS1AHOXA9	11	45.8333	0.133785	824, 23022, 5243, 55679, 5270, 1295, 7373, 130340, 10512, 4233, 22984	23	2706	8425	1.48904	1	0.420963	82.8082
UCSC_TFBS	FREAC4	13	54.1667	0.154685	23022, 1192, 5243, 1295, 10512, 22984, 2274, 55679, 5270, 1490, 7373, 4233, 389136	23	3505	8425	1.35862	1	0.451279	87.2567
UCSC_TFBS	OCT	13	54.1667	0.15496	824, 23022, 5243, 1295, 10512, 22984, 7913, 70, 7373, 130340, 4233, 389136, 7057	23	3506	8425	1.35823	1	0.445284	87.3074
UCSC_TFBS	RSRFC4	13	54.1667	0.156891	23022, 5243, 1295, 10512, 7422, 2274, 5270, 1490, 70, 130340, 4233, 389136, 7057	23	3513	8425	1.35552	1	0.443225	87.6584
UCSC_TFBS	IK3	13	54.1667	0.177018	23022, 5243, 1295, 1382, 6347, 10512, 22984, 7422, 558, 5270, 7373, 130340, 4233	23	3583	8425	1.32904	1	0.480895	90.8225
UCSC_TFBS	EVI1	20	83.3333	0.178959	824, 23022, 1192, 5243, 1295, 10512, 22984, 7913, 7422, 2274, 5270, 558, 55679, 1490, 70, 7373, 71, 130340, 389136, 4233	23	6372	8425	1.14973	1	0.478514	91.0843
UCSC_TFBS	FOXD3	10	41.6667	0.180306	23022, 5243, 5270, 1295, 1490, 70, 7373, 10512, 4233, 22984	23	2510	8425	1.45938	1	0.47499	91.262
UCSC_TFBS	HSF2	12	50	0.18462	824, 23022, 1192, 7422, 5243, 2274, 1295, 7373, 130340, 10512, 4233, 389136	23	3240	8425	1.35668	1	0.477648	91.8094
UCSC_TFBS	PAX2	16	66.6667	0.192602	824, 23022, 1192, 1295, 10512, 22984, 7422, 2274, 558, 55679, 1490, 70, 7373, 71, 4233, 389136	23	4778	8425	1.22664	1	0.481506	92.7399
UCSC_TFBS	XBP1	14	58.3333	0.197616	824, 23022, 1192, 5243, 1295, 1382, 22984, 7422, 558, 55679, 70, 71, 4233, 389136	23	4025	8425	1.2741	1	0.485366	93.2737
UCSC_TFBS	41183	21	87.5	0.208805	824, 23022, 1192, 5243, 1295, 10512, 22984, 7913, 7422, 2274, 5270, 558, 55679, 1490, 70, 7373, 71, 130340, 389136, 4233, 7057	23	6893	8425	1.11597	1	0.483706	94.3375
UCSC_TFBS	IRF1	8	33.3333	0.218389	23022, 5243, 5270, 1295, 70, 7373, 130340, 4233	23	1919	8425	1.52706	1	0.495627	95.1234
UCSC_TFBS	HNF3B	11	45.8333	0.231608	23022, 1192, 7422, 5243, 5270, 1295, 1490, 7373, 10512, 4233, 389136	23	3015	8425	1.33643	1	0.508013	96.0436
UCSC_TFBS	SOX9	12	50	0.233769	23022, 5243, 55679, 5270, 1295, 1382, 70, 7373, 130340, 10512, 4233, 389136	23	3387	8425	1.2978	1	0.506397	96.1779
UCSC_TFBS	HFH3	11	45.8333	0.238563	23022, 7422, 5243, 2274, 558, 1295, 1490, 7373, 10512, 4233, 389136	23	3034	8425	1.32806	1	0.504114	96.4609
UCSC_TFBS	ATF6	13	54.1667	0.240003	23022, 1192, 5243, 1295, 7422, 2274, 55679, 5270, 70, 7373, 71, 4233, 389136	23	3776	8425	1.26111	1	0.496464	96.5421
UCSC_TFBS	MEF2	18	75	0.240278	824, 23022, 1192, 5243, 1295, 10512, 22984, 7913, 7422, 2274, 5270, 1490, 70, 7373, 130340, 4233, 389136, 7057	23	5715	8425	1.15371	1	0.49203	96.5574
UCSC_TFBS	FOXO4	14	58.3333	0.247554	23022, 5243, 1295, 10512, 22984, 7422, 2274, 1490, 70, 7373, 130340, 4233, 389136, 7057	23	4174	8425	1.22862	1	0.499082	96.9405
UCSC_TFBS	FOXJ2	16	66.6667	0.247967	824, 23022, 5243, 1295, 10512, 22984, 7913, 7422, 2274, 5270, 1490, 70, 7373, 130340, 4233, 389136	23	4944	8425	1.18545	1	0.49498	96.961
UCSC_TFBS	AP1FJ	9	37.5	0.249465	23022, 1192, 7422, 55679, 558, 7373, 4233, 389136, 22984	23	2344	8425	1.40646	1	0.492695	97.0344
UCSC_TFBS	RORA1	12	50	0.254087	23022, 1192, 7422, 5243, 5270, 1295, 70, 71, 10512, 4233, 389136, 22984	23	3443	8425	1.27669	1	0.49541	97.2507
UCSC_TFBS	NKX3A	12	50	0.259296	23022, 7913, 5243, 2274, 5270, 1295, 1490, 7373, 10512, 4233, 389136, 22984	23	3457	8425	1.27152	1	0.49448	97.477
UCSC_TFBS	HNF4	13	54.1667	0.262437	824, 1192, 5243, 1295, 10512, 22984, 7422, 558, 55679, 5270, 7373, 4233, 389136	23	3838	8425	1.24074	1	0.490493	97.6051
UCSC_TFBS	TAL1BETAITF2	14	58.3333	0.263109	23022, 1192, 1295, 10512, 22984, 7913, 55679, 5270, 1490, 7373, 130340, 4233, 389136, 7057	23	4217	8425	1.21609	1	0.487205	97.6318
UCSC_TFBS	FOXO1	11	45.8333	0.289881	23022, 7913, 5243, 2274, 1295, 7373, 130340, 10512, 4233, 389136, 22984	23	3167	8425	1.27229	1	0.522689	98.4955
UCSC_TFBS	CDPCR3	14	58.3333	0.293314	824, 23022, 1192, 1295, 6347, 10512, 22984, 7422, 5270, 1490, 7373, 130340, 4233, 389136	23	4297	8425	1.19345	1	0.523319	98.5823
UCSC_TFBS	NCX	12	50	0.295907	824, 23022, 1192, 7422, 2274, 55679, 558, 1295, 1490, 7373, 10512, 389136	23	3552	8425	1.23751	1	0.522759	98.6448
UCSC_TFBS	SRY	11	45.8333	0.296342	23022, 7422, 5243, 2274, 5270, 1295, 7373, 10512, 4233, 389136, 22984	23	3183	8425	1.2659	1	0.519156	98.655
UCSC_TFBS	RREB1	11	45.8333	0.306137	23022, 1192, 7422, 55679, 5270, 558, 1382, 70, 4233, 389136, 22984	23	3207	8425	1.25642	1	0.524653	98.8674
UCSC_TFBS	HEN1	15	62.5	0.315158	23022, 1192, 5243, 1295, 10512, 22984, 7422, 2274, 558, 55679, 5270, 1490, 70, 7373, 389136	23	4734	8425	1.16066	1	0.52897	99.0353
UCSC_TFBS	IRF2	11	45.8333	0.317716	23022, 7422, 5243, 5270, 1295, 70, 7373, 10512, 4233, 389136, 22984	23	3235	8425	1.24555	1	0.528451	99.0785
UCSC_TFBS	FREAC3	11	45.8333	0.320635	23022, 5243, 5270, 1295, 70, 7373, 71, 130340, 10512, 4233, 22984	23	3242	8425	1.24286	1	0.528443	99.1257
UCSC_TFBS	AP2REP	12	50	0.326239	23022, 1192, 7422, 5243, 2274, 55679, 5270, 558, 1295, 1382, 130340, 22984	23	3627	8425	1.21193	1	0.528167	99.2101
UCSC_TFBS	CDC5	11	45.8333	0.336218	23022, 5243, 2274, 5270, 1295, 70, 7373, 10512, 4233, 389136, 22984	23	3279	8425	1.22883	1	0.533701	99.3422
UCSC_TFBS	E4BP4	11	45.8333	0.34346	23022, 7913, 5243, 2274, 5270, 1295, 7373, 71, 10512, 4233, 389136	23	3296	8425	1.2225	1	0.539345	99.4249
UCSC_TFBS	MIF1	11	45.8333	0.370701	824, 23022, 1192, 7422, 5243, 558, 1382, 7373, 71, 4233, 22984	23	3359	8425	1.19957	1	0.562664	99.658
UCSC_TFBS	TCF11MAFG	13	54.1667	0.394169	23022, 1192, 5243, 1295, 1382, 10512, 2274, 558, 55679, 1490, 7373, 4233, 389136	23	4163	8425	1.14388	1	0.587648	99.7853
UCSC_TFBS	STAT5A	14	58.3333	0.407591	824, 23022, 1192, 5243, 1295, 10512, 7422, 2274, 558, 55679, 5270, 1490, 7373, 4233	23	4572	8425	1.12167	1	0.599974	99.8369
UCSC_TFBS	HLF	10	41.6667	0.408347	23022, 7913, 5243, 2274, 5270, 1295, 130340, 4233, 389136, 22984	23	3071	8425	1.19279	1	0.597221	99.8394
UCSC_TFBS	EN1	13	54.1667	0.410746	23022, 1192, 5243, 1295, 10512, 7422, 558, 55679, 5270, 1490, 7373, 4233, 389136	23	4201	8425	1.13353	1	0.592866	99.8472
UCSC_TFBS	CHOP	12	50	0.41541	824, 23022, 1192, 7422, 2274, 5270, 558, 70, 7373, 10512, 4233, 389136	23	3835	8425	1.14619	1	0.594788	99.8614
UCSC_TFBS	P300	10	41.6667	0.415671	824, 23022, 1192, 7422, 2274, 558, 1295, 1490, 389136, 22984	23	3087	8425	1.1866	1	0.59159	99.8622
UCSC_TFBS	CREL	5	20.8333	0.433201	23022, 2274, 1295, 10512, 4233	23	1277	8425	1.43424	1	0.604879	99.9051
UCSC_TFBS	PAX6	13	54.1667	0.459534	23022, 5243, 1295, 1382, 10512, 22984, 7913, 7422, 2274, 558, 55679, 7373, 4233	23	4311	8425	1.10461	1	0.624285	99.9471
UCSC_TFBS	HTF	13	54.1667	0.468047	1192, 5243, 1295, 22984, 7913, 7422, 55679, 1490, 70, 7373, 71, 4233, 389136	23	4330	8425	1.09976	1	0.630327	99.9564
UCSC_TFBS	NRSF	13	54.1667	0.490966	824, 1192, 5243, 1295, 6347, 22984, 7422, 558, 55679, 5270, 1490, 4233, 389136	23	4381	8425	1.08696	1	0.645325	99.9746
UCSC_TFBS	TBP	8	33.3333	0.501721	23022, 5243, 2274, 1295, 7373, 10512, 4233, 389136	23	2519	8425	1.16333	1	0.644093	99.9804
UCSC_TFBS	COUP	10	41.6667	0.546501	824, 23022, 7422, 2274, 1295, 1382, 7373, 10512, 4233, 22984	23	3371	8425	1.08663	1	0.68135	99.9938
UCSC_TFBS	NKX22	10	41.6667	0.55014	824, 23022, 7913, 5243, 5270, 558, 1295, 7373, 10512, 4233	23	3379	8425	1.08406	1	0.682045	99.9944
UCSC_TFBS	HFH1	10	41.6667	0.563731	23022, 7422, 2274, 1295, 7373, 130340, 10512, 4233, 389136, 22984	23	3409	8425	1.07452	1	0.692776	99.9962
UCSC_TFBS	GCNF	13	54.1667	0.57129	23022, 5243, 1295, 10512, 22984, 7913, 558, 5270, 1490, 70, 7373, 4233, 7057	23	4560	8425	1.04429	1	0.697395	99.9969
UCSC_TFBS	CDP	13	54.1667	0.571735	23022, 1192, 5243, 1295, 10512, 22984, 2274, 558, 5270, 70, 7373, 4233, 389136	23	4561	8425	1.04406	1	0.694931	99.9969
UCSC_TFBS	POU6F1	9	37.5	0.574493	23022, 5243, 55679, 5270, 1295, 7373, 10512, 4233, 22984	23	3052	8425	1.08019	1	0.694794	99.9972
UCSC_TFBS	LYF1	9	37.5	0.587263	23022, 1192, 7422, 5270, 1295, 7373, 130340, 4233, 389136	23	3080	8425	1.07037	1	0.704597	99.9981
UCSC_TFBS	MYOGNF1	11	45.8333	0.595476	824, 23022, 1192, 5243, 55679, 558, 1382, 7373, 4233, 389136, 22984	23	3860	8425	1.04387	1	0.707056	99.9985
UCSC_TFBS	ARNT	11	45.8333	0.605509	23022, 1192, 7422, 55679, 5270, 558, 1382, 130340, 10512, 4233, 22984	23	3883	8425	1.03769	1	0.711361	99.9989
UCSC_TFBS	MRF2	11	45.8333	0.65527	23022, 1192, 55679, 558, 1295, 7373, 71, 10512, 4233, 389136, 22984	23	4000	8425	1.00734	1	0.753725	99.9998
UCSC_TFBS	CP2	9	37.5	0.666379	23022, 7422, 5243, 558, 1295, 7373, 10512, 4233, 22984	23	3261	8425	1.01096	1	0.761558	99.9999
UCSC_TFBS	TGIF	9	37.5	0.686159	23022, 7422, 5243, 1295, 1382, 70, 7373, 10512, 389136	23	3309	8425	0.996295	1	0.772432	99.9999
UCSC_TFBS	CEBPA	6	25	0.688506	23022, 7422, 5243, 1295, 10512, 4233	23	2132	8425	1.03088	1	0.772157	99.9999
UCSC_TFBS	FAC1	10	41.6667	0.718114	824, 23022, 7422, 2274, 5270, 1295, 1490, 7373, 10512, 4233	23	3776	8425	0.970086	1	0.785372	100
UCSC_TFBS	LMO2COM	12	50	0.771863	23022, 1192, 7422, 55679, 1295, 1490, 7373, 71, 10512, 4233, 389136, 7057	23	4683	8425	0.93864	1	0.827834	100
UCSC_TFBS	MYCMAX	13	54.1667	0.776418	23022, 1192, 1295, 1382, 10512, 22984, 7422, 558, 55679, 5270, 71, 4233, 389136	23	5067	8425	0.939798	1	0.827846	100
UCSC_TFBS	USF	12	50	0.793647	23022, 1192, 7422, 55679, 5270, 558, 1295, 1382, 7373, 71, 4233, 22984	23	4748	8425	0.92579	1	0.835541	100
UP_SEQ_FEATURE	sequence variant	14	58.3333	0.7962	824, 23022, 5243, 10512, 22984, 7913, 558, 5270, 1490, 70, 7373, 71, 4233, 7057	24	5286	8439	0.931281	1	1	100
UCSC_TFBS	PPARA	11	45.8333	0.806438	824, 23022, 1192, 7422, 55679, 5270, 1295, 7373, 4233, 389136, 22984	23	4413	8425	0.913063	1	0.845272	100
SP_PIR_KEYWORDS	polymorphism	13	54.1667	0.823813	824, 23022, 5243, 10512, 22984, 7913, 558, 5270, 1490, 7373, 71, 4233, 7057	24	5024	8445	0.910505	1	0.999622	100
UCSC_TFBS	SREBP1	12	50	0.829759	23022, 1192, 7422, 55679, 5270, 1295, 1382, 70, 10512, 4233, 389136, 22984	23	4865	8425	0.903526	1	0.862781	100
UCSC_TFBS	RFX1	12	50	0.841442	824, 23022, 1192, 7422, 5243, 55679, 1295, 7373, 10512, 4233, 389136, 22984	23	4906	8425	0.895975	1	0.871622	100
UCSC_TFBS	GATA1	16	66.6667	0.876908	824, 23022, 1192, 5243, 1295, 10512, 22984, 7422, 2274, 5270, 558, 1490, 70, 7373, 4233, 389136	23	6443	8425	0.909649	1	0.897407	100
UCSC_TFBS	TAXCREB	10	41.6667	0.921806	23022, 7422, 55679, 558, 1382, 70, 71, 389136, 22984, 7057	23	4523	8425	0.80987	1	0.931897	100
Annotation Cluster 20	Enrichment Score: 0.6220771426853384
Category	Term	Count	%	PValue	Genes	List Total	Pop Hits	Pop Total	Fold Enrichment	Bonferroni	Benjamini	FDR
GOTERM_CC_FAT	GO:0044433~cytoplasmic vesicle part	3	12.5	0.054018	7422, 130340, 7057	20	123	6172	7.52683	0.997515	0.3126	46.4893
GOTERM_CC_FAT	GO:0016023~cytoplasmic membrane-bounded vesicle	3	12.5	0.303955	7422, 130340, 7057	20	359	6172	2.57883	1	0.831153	98.3092
GOTERM_CC_FAT	GO:0031988~membrane-bounded vesicle	3	12.5	0.322574	7422, 130340, 7057	20	375	6172	2.4688	1	0.839385	98.754
GOTERM_CC_FAT	GO:0031410~cytoplasmic vesicle	3	12.5	0.369843	7422, 130340, 7057	20	416	6172	2.22548	1	0.874825	99.4482
GOTERM_CC_FAT	GO:0031982~vesicle	3	12.5	0.395931	7422, 130340, 7057	20	439	6172	2.10888	1	0.876784	99.6572
Annotation Cluster 21	Enrichment Score: 0.6154392512453133
Category	Term	Count	%	PValue	Genes	List Total	Pop Hits	Pop Total	Fold Enrichment	Bonferroni	Benjamini	FDR
UCSC_TFBS	HNF1	16	66.6667	0.0672997	23022, 1192, 5243, 1295, 6347, 10512, 22984, 7422, 2274, 5270, 7373, 71, 130340, 4233, 389136, 7057	23	4217	8425	1.38982	0.999995	0.343236	57.4349
UCSC_TFBS	SRY	11	45.8333	0.296342	23022, 7422, 5243, 2274, 5270, 1295, 7373, 10512, 4233, 389136, 22984	23	3183	8425	1.2659	1	0.519156	98.655
UCSC_TFBS	CREBP1	10	41.6667	0.714294	23022, 7422, 5270, 1295, 71, 10512, 4233, 389136, 22984, 7057	23	3766	8425	0.972662	1	0.784142	100
Annotation Cluster 22	Enrichment Score: 0.5317822218242267
Category	Term	Count	%	PValue	Genes	List Total	Pop Hits	Pop Total	Fold Enrichment	Bonferroni	Benjamini	FDR
UCSC_TFBS	MYB	13	54.1667	0.187944	23022, 1192, 5243, 1295, 22984, 558, 55679, 1490, 71, 130340, 4233, 389136, 7057	23	3619	8425	1.31582	1	0.478257	92.2094
UCSC_TFBS	E47	16	66.6667	0.202615	23022, 1192, 5243, 1295, 6347, 22984, 7913, 7422, 2274, 558, 55679, 71, 130340, 4233, 389136, 7057	23	4810	8425	1.21848	1	0.483348	93.7699
UCSC_TFBS	TCF11	14	58.3333	0.218956	824, 23022, 1192, 5243, 22984, 7913, 2274, 558, 55679, 71, 130340, 4233, 389136, 7057	23	4091	8425	1.25355	1	0.491216	95.1666
SP_PIR_KEYWORDS	phosphoprotein	10	41.6667	0.89498	23022, 7913, 1192, 5243, 2274, 55679, 558, 71, 4233, 22984	24	4221	8445	0.833629	1	0.999947	100
Annotation Cluster 23	Enrichment Score: 0.4849817013380217
Category	Term	Count	%	PValue	Genes	List Total	Pop Hits	Pop Total	Fold Enrichment	Bonferroni	Benjamini	FDR
GOTERM_CC_FAT	GO:0015629~actin cytoskeleton	3	12.5	0.103669	23022, 70, 71	20	179	6172	5.17207	0.999993	0.481426	70.8396
GOTERM_BP_FAT	GO:0007010~cytoskeleton organization	3	12.5	0.244316	23022, 70, 71	23	282	6549	3.02914	1	0.979902	98.2872
SP_PIR_KEYWORDS	cytoskeleton	3	12.5	0.278347	23022, 70, 71	24	381	8445	2.77067	1	0.896096	97.6086
GOTERM_CC_FAT	GO:0005856~cytoskeleton	4	16.6667	0.37984	23022, 2274, 70, 71	20	714	6172	1.72885	1	0.873054	99.5391
GOTERM_CC_FAT	GO:0043232~intracellular non-membrane-bounded organelle	5	20.8333	0.677893	23022, 2274, 70, 71, 22984	20	1437	6172	1.07376	1	0.985286	99.9997
GOTERM_CC_FAT	GO:0043228~non-membrane-bounded organelle	5	20.8333	0.677893	23022, 2274, 70, 71, 22984	20	1437	6172	1.07376	1	0.985286	99.9997
Annotation Cluster 24	Enrichment Score: 0.46767430740980187
Category	Term	Count	%	PValue	Genes	List Total	Pop Hits	Pop Total	Fold Enrichment	Bonferroni	Benjamini	FDR
GOTERM_MF_FAT	GO:0042802~identical protein binding	4	16.6667	0.170391	7422, 2274, 71, 7057	23	405	6200	2.66237	1	0.992225	88.6435
GOTERM_BP_FAT	GO:0010557~positive regulation of macromolecule biosynthetic process	3	12.5	0.354187	7422, 2274, 7057	23	369	6549	2.31495	1	0.99484	99.825
GOTERM_BP_FAT	GO:0031328~positive regulation of cellular biosynthetic process	3	12.5	0.382702	7422, 2274, 7057	23	392	6549	2.17913	1	0.996144	99.9091
GOTERM_BP_FAT	GO:0009891~positive regulation of biosynthetic process	3	12.5	0.387617	7422, 2274, 7057	23	396	6549	2.15711	1	0.996034	99.9191
GOTERM_BP_FAT	GO:0010604~positive regulation of macromolecule metabolic process	3	12.5	0.512491	7422, 2274, 7057	23	503	6549	1.69825	1	0.998886	99.997
Annotation Cluster 25	Enrichment Score: 0.4494508953425731
Category	Term	Count	%	PValue	Genes	List Total	Pop Hits	Pop Total	Fold Enrichment	Bonferroni	Benjamini	FDR
UCSC_TFBS	CDPCR1	11	45.8333	0.239301	824, 23022, 5243, 5270, 1295, 1382, 71, 10512, 4233, 389136, 7057	23	3036	8425	1.32719	1	0.500278	96.5027
UCSC_TFBS	CHX10	11	45.8333	0.262317	23022, 1192, 2274, 5270, 1295, 71, 130340, 10512, 4233, 389136, 7057	23	3097	8425	1.30105	1	0.494695	97.6004
UCSC_TFBS	CREBP1	10	41.6667	0.714294	23022, 7422, 5270, 1295, 71, 10512, 4233, 389136, 22984, 7057	23	3766	8425	0.972662	1	0.784142	100
Annotation Cluster 26	Enrichment Score: 0.4183830670439394
Category	Term	Count	%	PValue	Genes	List Total	Pop Hits	Pop Total	Fold Enrichment	Bonferroni	Benjamini	FDR
GOTERM_BP_FAT	GO:0006915~apoptosis	3	12.5	0.341674	23089, 70, 7057	23	359	6549	2.37944	1	0.994884	99.7688
GOTERM_BP_FAT	GO:0012501~programmed cell death	3	12.5	0.349189	23089, 70, 7057	23	365	6549	2.34032	1	0.99498	99.8043
GOTERM_BP_FAT	GO:0008219~cell death	3	12.5	0.420399	23089, 70, 7057	23	423	6549	2.01943	1	0.997576	99.9636
GOTERM_BP_FAT	GO:0016265~death	3	12.5	0.422798	23089, 70, 7057	23	425	6549	2.00992	1	0.997379	99.9657
Annotation Cluster 27	Enrichment Score: 0.3946376688360242
Category	Term	Count	%	PValue	Genes	List Total	Pop Hits	Pop Total	Fold Enrichment	Bonferroni	Benjamini	FDR
GOTERM_CC_FAT	GO:0000267~cell fraction	6	25	0.0359982	824, 1192, 5243, 70, 71, 4233	20	622	6172	2.97685	0.980927	0.246346	33.8216
SP_PIR_KEYWORDS	ATP	3	12.5	0.0703826	5243, 558, 4233	24	161	8445	6.55668	0.999818	0.577341	56.6228
SP_PIR_KEYWORDS	atp-binding	5	20.8333	0.131483	5243, 558, 70, 71, 4233	24	729	8445	2.41341	1	0.721839	80.0769
GOTERM_CC_FAT	GO:0005626~insoluble fraction	4	16.6667	0.17202	824, 1192, 5243, 4233	20	470	6172	2.62638	1	0.639165	88.0627
SP_PIR_KEYWORDS	nucleotide-binding	5	20.8333	0.24053	5243, 558, 70, 71, 4233	24	926	8445	1.89997	1	0.901627	95.7094
SP_PIR_KEYWORDS	transmembrane protein	3	12.5	0.253732	5243, 558, 4233	24	357	8445	2.95693	1	0.899975	96.4896
GOTERM_MF_FAT	GO:0005524~ATP binding	5	20.8333	0.31108	5243, 558, 70, 71, 4233	23	797	6200	1.69112	1	0.999688	98.6957
GOTERM_MF_FAT	GO:0032559~adenyl ribonucleotide binding	5	20.8333	0.318688	5243, 558, 70, 71, 4233	23	806	6200	1.67224	1	0.998042	98.8539
GOTERM_MF_FAT	GO:0030554~adenyl nucleotide binding	5	20.8333	0.363063	5243, 558, 70, 71, 4233	23	858	6200	1.57089	1	0.995161	99.4769
GOTERM_MF_FAT	GO:0001883~purine nucleoside binding	5	20.8333	0.372508	5243, 558, 70, 71, 4233	23	869	6200	1.55101	1	0.993582	99.5604
GOTERM_MF_FAT	GO:0001882~nucleoside binding	5	20.8333	0.376803	5243, 558, 70, 71, 4233	23	874	6200	1.54214	1	0.991164	99.5942
GOTERM_CC_FAT	GO:0005624~membrane fraction	3	12.5	0.40715	1192, 5243, 4233	20	449	6172	2.06192	1	0.876468	99.7224
GOTERM_MF_FAT	GO:0032553~ribonucleotide binding	5	20.8333	0.473302	5243, 558, 70, 71, 4233	23	987	6200	1.36558	1	0.996137	99.9428
GOTERM_MF_FAT	GO:0032555~purine ribonucleotide binding	5	20.8333	0.473302	5243, 558, 70, 71, 4233	23	987	6200	1.36558	1	0.996137	99.9428
GOTERM_MF_FAT	GO:0017076~purine nucleotide binding	5	20.8333	0.517323	5243, 558, 70, 71, 4233	23	1040	6200	1.29599	1	0.99731	99.9793
GOTERM_MF_FAT	GO:0000166~nucleotide binding	5	20.8333	0.664953	5243, 558, 70, 71, 4233	23	1235	6200	1.09136	1	0.999766	99.9997
UCSC_TFBS	SP1	6	25	0.683989	23022, 1192, 7422, 5243, 558, 389136	23	2122	8425	1.03573	1	0.772891	99.9999
SP_PIR_KEYWORDS	disease mutation	3	12.5	0.724845	70, 71, 4233	24	908	8445	1.16258	1	0.998667	100
SP_PIR_KEYWORDS	membrane	7	29.1667	0.788043	824, 1192, 5243, 55679, 558, 130340, 4233	24	2683	8445	0.918049	1	0.999339	100
UCSC_TFBS	SPZ1	6	25	0.869782	1192, 7422, 558, 1382, 4233, 389136	23	2653	8425	0.82843	1	0.893933	100
UP_SEQ_FEATURE	topological domain:Cytoplasmic	3	12.5	0.873305	5243, 558, 4233	24	1244	8439	0.84797	1	1	100
UP_SEQ_FEATURE	transmembrane region	4	16.6667	0.925135	1192, 5243, 558, 4233	24	1938	8439	0.725748	1	1	100
SP_PIR_KEYWORDS	transmembrane	4	16.6667	0.927195	1192, 5243, 558, 4233	24	1951	8445	0.721425	1	0.999977	100
GOTERM_CC_FAT	GO:0016021~integral to membrane	4	16.6667	0.980008	1192, 5243, 558, 4233	20	2110	6172	0.585024	1	0.999998	100
GOTERM_CC_FAT	GO:0031224~intrinsic to membrane	4	16.6667	0.984561	1192, 5243, 558, 4233	20	2185	6172	0.564943	1	0.999999	100
Annotation Cluster 28	Enrichment Score: 0.3601572972121049
Category	Term	Count	%	PValue	Genes	List Total	Pop Hits	Pop Total	Fold Enrichment	Bonferroni	Benjamini	FDR
UCSC_TFBS	HAND1E47	13	54.1667	0.202141	23022, 1192, 5243, 1295, 1382, 10512, 7422, 558, 55679, 5270, 7373, 71, 4233	23	3664	8425	1.29966	1	0.488197	93.7243
UCSC_TFBS	NMYC	8	33.3333	0.517901	23022, 7422, 5243, 55679, 5270, 558, 71, 4233	23	2552	8425	1.14829	1	0.65493	99.987
UCSC_TFBS	USF	12	50	0.793647	23022, 1192, 7422, 55679, 5270, 558, 1295, 1382, 7373, 71, 4233, 22984	23	4748	8425	0.92579	1	0.835541	100
Annotation Cluster 29	Enrichment Score: 0.3473247334047758
Category	Term	Count	%	PValue	Genes	List Total	Pop Hits	Pop Total	Fold Enrichment	Bonferroni	Benjamini	FDR
GOTERM_BP_FAT	GO:0006357~regulation of transcription from RNA polymerase II promoter	3	12.5	0.380239	7913, 7422, 2274	23	390	6549	2.1903	1	0.996428	99.9037
GOTERM_BP_FAT	GO:0006355~regulation of transcription, DNA-dependent	4	16.6667	0.434096	7913, 7422, 2274, 1382	23	712	6549	1.59966	1	0.997606	99.9743
GOTERM_BP_FAT	GO:0051252~regulation of RNA metabolic process	4	16.6667	0.461095	7913, 7422, 2274, 1382	23	741	6549	1.53705	1	0.998379	99.9874
GOTERM_BP_FAT	GO:0045449~regulation of transcription	5	20.8333	0.536128	7913, 7422, 2274, 1382, 389136	23	1123	6549	1.26776	1	0.999209	99.9986
Annotation Cluster 30	Enrichment Score: 0.2757934446020547
Category	Term	Count	%	PValue	Genes	List Total	Pop Hits	Pop Total	Fold Enrichment	Bonferroni	Benjamini	FDR
UCSC_TFBS	EN1	13	54.1667	0.410746	23022, 1192, 5243, 1295, 10512, 7422, 558, 55679, 5270, 1490, 7373, 4233, 389136	23	4201	8425	1.13353	1	0.592866	99.8472
UP_SEQ_FEATURE	splice variant	11	45.8333	0.525412	23022, 23089, 7422, 55679, 5270, 558, 1490, 7373, 130340, 4233, 389136	24	3551	8439	1.08924	1	1	99.988
SP_PIR_KEYWORDS	alternative splicing	10	41.6667	0.689518	23022, 7422, 55679, 5270, 558, 1490, 7373, 130340, 4233, 389136	24	3559	8445	0.988691	1	0.998114	99.9998
Annotation Cluster 31	Enrichment Score: 0.18497534739889113
Category	Term	Count	%	PValue	Genes	List Total	Pop Hits	Pop Total	Fold Enrichment	Bonferroni	Benjamini	FDR
UCSC_TFBS	AP1FJ	9	37.5	0.249465	23022, 1192, 7422, 55679, 558, 7373, 4233, 389136, 22984	23	2344	8425	1.40646	1	0.492695	97.0344
UCSC_TFBS	CETS1P54	6	25	0.692092	23022, 7422, 55679, 558, 1295, 7373	23	2140	8425	1.02702	1	0.773052	99.9999
UP_TISSUE	Lung	4	16.6667	0.806858	7422, 55679, 1295, 71	24	1482	8283	0.931511	1	0.999828	100
UCSC_TFBS	ZIC2	4	16.6667	0.90922	7422, 55679, 558, 7373	23	1931	8425	0.758787	1	0.921506	100
UCSC_TFBS	ELK1	9	37.5	0.938606	824, 1192, 7422, 55679, 558, 1295, 7373, 71, 22984	23	4250	8425	0.775703	1	0.946288	100
Annotation Cluster 32	Enrichment Score: 0.11726655947262407
Category	Term	Count	%	PValue	Genes	List Total	Pop Hits	Pop Total	Fold Enrichment	Bonferroni	Benjamini	FDR
SP_PIR_KEYWORDS	acetylation	6	25	0.594467	7913, 1192, 7422, 70, 71, 22984	24	1860	8445	1.13508	1	0.995132	99.9967
UCSC_TFBS	CREB	9	37.5	0.761959	7913, 1192, 7422, 558, 1490, 70, 71, 22984, 7057	23	3509	8425	0.93951	1	0.821007	100
UCSC_TFBS	NRF2	4	16.6667	0.982067	7422, 558, 71, 22984	23	2577	8425	0.568575	1	0.984067	100
Annotation Cluster 33	Enrichment Score: 0.1098846357800285
Category	Term	Count	%	PValue	Genes	List Total	Pop Hits	Pop Total	Fold Enrichment	Bonferroni	Benjamini	FDR
UP_TISSUE	Uterus	4	16.6667	0.563291	23022, 55679, 71, 22984	24	1037	8283	1.33124	1	0.9952	99.9737
UCSC_TFBS	ATF	6	25	0.864243	23022, 1192, 55679, 1382, 1490, 22984	23	2631	8425	0.835358	1	0.89049	100
UCSC_TFBS	AHR	5	20.8333	0.961562	23022, 55679, 1382, 71, 22984	23	2769	8425	0.661438	1	0.965762	100
Annotation Cluster 34	Enrichment Score: 0.08443891604259886
Category	Term	Count	%	PValue	Genes	List Total	Pop Hits	Pop Total	Fold Enrichment	Bonferroni	Benjamini	FDR
UCSC_TFBS	AP2	6	25	0.670685	23022, 7422, 1295, 71, 22984, 7057	23	2093	8425	1.05008	1	0.763036	99.9999
GOTERM_CC_FAT	GO:0043233~organelle lumen	3	12.5	0.909036	7422, 22984, 7057	20	1202	6172	0.770216	1	0.999821	100
GOTERM_CC_FAT	GO:0031974~membrane-enclosed lumen	3	12.5	0.915343	7422, 22984, 7057	20	1226	6172	0.755139	1	0.999816	100
Annotation Cluster 35	Enrichment Score: 0.053318461775717134
Category	Term	Count	%	PValue	Genes	List Total	Pop Hits	Pop Total	Fold Enrichment	Bonferroni	Benjamini	FDR
SP_PIR_KEYWORDS	zinc	3	12.5	0.73761	23089, 2274, 55679	24	930	8445	1.13508	1	0.99861	100
GOTERM_MF_FAT	GO:0043167~ion binding	6	25	0.862556	824, 23089, 1192, 2274, 55679, 7057	23	1931	6200	0.837593	1	0.999999	100
GOTERM_MF_FAT	GO:0008270~zinc ion binding	3	12.5	0.876997	23089, 2274, 55679	23	962	6200	0.84064	1	0.999999	100
SP_PIR_KEYWORDS	metal-binding	3	12.5	0.903435	23089, 2274, 55679	24	1354	8445	0.779634	1	0.999947	100
GOTERM_MF_FAT	GO:0046872~metal ion binding	5	20.8333	0.936903	824, 23089, 2274, 55679, 7057	23	1883	6200	0.715787	1	1	100
GOTERM_MF_FAT	GO:0043169~cation binding	5	20.8333	0.94126	824, 23089, 2274, 55679, 7057	23	1906	6200	0.707149	1	1	100
GOTERM_MF_FAT	GO:0046914~transition metal ion binding	3	12.5	0.952484	23089, 2274, 55679	23	1241	6200	0.651648	1	1	100

## Sheet: Functional cluster 4
Annotation Cluster 1	Enrichment Score: 2.767487292787144
Category	Term	Count	%	PValue	Genes	List Total	Pop Hits	Pop Total	Fold Enrichment	Bonferroni	Benjamini	FDR
GOTERM_BP_FAT	GO:0010033~response to organic substance	19	18.4466	4.84454e-05	7832, 123, 2052, 5577, 4435, 59345, 2690, 4257, 6880, 348, 2180, 3481, 7390, 79602, 3553, 2353, 2170, 4792, 4609	85	501	6549	2.92194	0.0701373	0.023948	0.0804698
GOTERM_BP_FAT	GO:0009719~response to endogenous stimulus	12	11.6505	0.000981624	3481, 7832, 7390, 5577, 4435, 2690, 3553, 79602, 59345, 2353, 2170, 4257	85	286	6549	3.23274	0.771025	0.189895	1.61869
GOTERM_BP_FAT	GO:0009725~response to hormone stimulus	10	9.70874	0.00625169	3481, 7832, 5577, 4435, 2690, 3553, 79602, 59345, 2353, 2170	85	263	6549	2.92955	0.999918	0.27718	9.89627
GOTERM_BP_FAT	GO:0032870~cellular response to hormone stimulus	6	5.82524	0.00692433	3481, 5577, 2690, 79602, 59345, 2353	85	94	6549	4.9179	0.99997	0.28569	10.9044
GOTERM_BP_FAT	GO:0009755~hormone-mediated signaling	4	3.8835	0.00706301	5577, 2690, 79602, 59345	85	31	6549	9.94156	0.999976	0.282853	11.1109
Annotation Cluster 2	Enrichment Score: 2.1314304248582743
Category	Term	Count	%	PValue	Genes	List Total	Pop Hits	Pop Total	Fold Enrichment	Bonferroni	Benjamini	FDR
GOTERM_BP_FAT	GO:0009991~response to extracellular stimulus	9	8.73786	0.000922502	2180, 136, 11243, 2690, 3553, 79602, 2353, 650, 360	85	159	6549	4.36115	0.749755	0.20617	1.5219
GOTERM_BP_FAT	GO:0007584~response to nutrient	6	5.82524	0.0097049	2180, 11243, 3553, 79602, 650, 360	85	102	6549	4.53218	1	0.262849	14.9602
GOTERM_BP_FAT	GO:0033280~response to vitamin D	3	2.91262	0.00987092	11243, 3553, 360	85	12	6549	19.2618	1	0.262047	15.1968
GOTERM_BP_FAT	GO:0031667~response to nutrient levels	7	6.79612	0.0101473	2180, 11243, 2690, 3553, 79602, 650, 360	85	144	6549	3.74534	1	0.263744	15.5893
GOTERM_BP_FAT	GO:0033273~response to vitamin	4	3.8835	0.0245573	11243, 3553, 650, 360	85	49	6549	6.28956	1	0.372812	33.8441
Annotation Cluster 3	Enrichment Score: 1.6972954712978945
Category	Term	Count	%	PValue	Genes	List Total	Pop Hits	Pop Total	Fold Enrichment	Bonferroni	Benjamini	FDR
GOTERM_BP_FAT	GO:0009612~response to mechanical stimulus	5	4.85437	0.00147193	7832, 6558, 2353, 650, 4609	85	39	6549	9.87783	0.890408	0.156399	2.41794
GOTERM_BP_FAT	GO:0009628~response to abiotic stimulus	7	6.79612	0.0463359	183, 7832, 6558, 3553, 2353, 650, 4609	85	204	6549	2.64377	1	0.470505	54.541
GOTERM_BP_FAT	GO:0050890~cognition	6	5.82524	0.118662	6558, 5577, 5264, 3553, 2353, 4609	85	203	6549	2.27725	1	0.687506	87.7411
Annotation Cluster 4	Enrichment Score: 1.6251456943151963
Category	Term	Count	%	PValue	Genes	List Total	Pop Hits	Pop Total	Fold Enrichment	Bonferroni	Benjamini	FDR
GOTERM_CC_FAT	GO:0042579~microbody	5	4.85437	0.0103578	2180, 30, 5264, 10901, 4257	80	67	6172	5.75746	0.888853	0.666613	12.3348
GOTERM_CC_FAT	GO:0005777~peroxisome	5	4.85437	0.0103578	2180, 30, 5264, 10901, 4257	80	67	6172	5.75746	0.888853	0.666613	12.3348
SP_PIR_KEYWORDS	peroxisome	4	3.8835	0.0327032	2180, 30, 5264, 10901	103	58	8445	5.6545	0.999921	0.649789	35.6352
GOTERM_CC_FAT	GO:0044438~microbody part	3	2.91262	0.0461925	2180, 30, 4257	80	27	6172	8.57222	0.999954	0.864093	45.0072
GOTERM_CC_FAT	GO:0044439~peroxisomal part	3	2.91262	0.0461925	2180, 30, 4257	80	27	6172	8.57222	0.999954	0.864093	45.0072
Annotation Cluster 5	Enrichment Score: 1.5662460841405816
Category	Term	Count	%	PValue	Genes	List Total	Pop Hits	Pop Total	Fold Enrichment	Bonferroni	Benjamini	FDR
SP_PIR_KEYWORDS	selenocysteine	3	2.91262	0.0238254	2878, 7296, 83642	103	20	8445	12.2985	0.998939	0.624063	27.3517
SP_PIR_KEYWORDS	selenium	3	2.91262	0.0261289	2878, 7296, 83642	103	21	8445	11.7129	0.999457	0.609337	29.5908
GOTERM_MF_FAT	GO:0008430~selenium binding	3	2.91262	0.032144	2878, 7296, 83642	81	22	6200	10.4377	0.999948	0.999948	35.4053
Annotation Cluster 6	Enrichment Score: 1.5352768557421814
Category	Term	Count	%	PValue	Genes	List Total	Pop Hits	Pop Total	Fold Enrichment	Bonferroni	Benjamini	FDR
GOTERM_BP_FAT	GO:0001501~skeletal system development	8	7.76699	0.0044146	3481, 3205, 11243, 7763, 2690, 650, 1906, 4609	85	161	6549	3.82843	0.998694	0.241724	7.08811
SP_PIR_KEYWORDS	cleavage on pair of basic residues	7	6.79612	0.00496251	3481, 11243, 9445, 1113, 56999, 650, 1906	103	131	8445	4.38116	0.756554	0.506598	6.37974
GOTERM_BP_FAT	GO:0001649~osteoblast differentiation	3	2.91262	0.0527846	3481, 11243, 650	85	29	6549	7.97039	1	0.498328	59.3879
GOTERM_BP_FAT	GO:0060348~bone development	4	3.8835	0.0757488	3481, 11243, 2690, 650	85	77	6549	4.00244	1	0.580789	72.9888
GOTERM_BP_FAT	GO:0001503~ossification	3	2.91262	0.240514	3481, 11243, 650	85	73	6549	3.16632	1	0.837834	98.9657
Annotation Cluster 7	Enrichment Score: 1.4913974972433648
Category	Term	Count	%	PValue	Genes	List Total	Pop Hits	Pop Total	Fold Enrichment	Bonferroni	Benjamini	FDR
GOTERM_BP_FAT	GO:0007167~enzyme linked receptor protein signaling pathway	8	7.76699	0.0185777	3481, 2263, 10468, 7763, 4435, 2690, 2353, 650	85	212	6549	2.90744	1	0.338954	26.7728
GOTERM_BP_FAT	GO:0007178~transmembrane receptor protein serine/threonine kinase signaling pathway	4	3.8835	0.0412836	10468, 4435, 2353, 650	85	60	6549	5.13647	1	0.459029	50.3693
GOTERM_MF_FAT	GO:0046332~SMAD binding	3	2.91262	0.0437561	4435, 2353, 650	81	26	6200	8.83191	0.999999	0.988936	45.0363
Annotation Cluster 8	Enrichment Score: 1.4811448738857456
Category	Term	Count	%	PValue	Genes	List Total	Pop Hits	Pop Total	Fold Enrichment	Bonferroni	Benjamini	FDR
KEGG_PATHWAY	hsa00071:Fatty acid metabolism	4	3.8835	0.0102502	2180, 223, 30, 1632	47	28	2795	8.49544	0.61244	0.377457	10.6456
SP_PIR_KEYWORDS	fatty acid metabolism	4	3.8835	0.0114104	2180, 30, 79602, 1632	103	39	8445	8.40926	0.961581	0.557271	14.1074
SP_PIR_KEYWORDS	lipid metabolism	5	4.85437	0.0138481	2180, 30, 79602, 6817, 1632	103	77	8445	5.32404	0.980944	0.547094	16.8719
GOTERM_BP_FAT	GO:0034440~lipid oxidation	3	2.91262	0.0736677	30, 79602, 1632	85	35	6549	6.60403	1	0.575636	71.9603
GOTERM_BP_FAT	GO:0019395~fatty acid oxidation	3	2.91262	0.0736677	30, 79602, 1632	85	35	6549	6.60403	1	0.575636	71.9603
GOTERM_BP_FAT	GO:0030258~lipid modification	3	2.91262	0.147622	30, 79602, 1632	85	53	6549	4.36115	1	0.722538	92.9638
Annotation Cluster 9	Enrichment Score: 1.4509957938132907
Category	Term	Count	%	PValue	Genes	List Total	Pop Hits	Pop Total	Fold Enrichment	Bonferroni	Benjamini	FDR
GOTERM_CC_FAT	GO:0005576~extracellular region	22	21.3592	0.00134545	5445, 5222, 55118, 813, 11243, 123, 2263, 2690, 1113, 11010, 56999, 650, 7482, 1906, 348, 3512, 3481, 118429, 183, 2878, 10468, 3553	80	831	6172	2.04248	0.247295	0.247295	1.6879
SP_PIR_KEYWORDS	Secreted	18	17.4757	0.00349451	5222, 55118, 813, 11243, 2263, 2690, 1113, 56999, 650, 7482, 1906, 348, 3481, 118429, 183, 2878, 10468, 3553	103	690	8445	2.13888	0.629972	0.629972	4.53283
GOTERM_CC_FAT	GO:0005615~extracellular space	10	9.70874	0.0321966	3481, 183, 11243, 2878, 2690, 3553, 650, 7482, 1906, 348	80	347	6172	2.22334	0.998997	0.899916	33.8857
GOTERM_CC_FAT	GO:0044421~extracellular region part	12	11.6505	0.0486818	55118, 3481, 183, 11243, 2878, 2690, 3553, 56999, 650, 7482, 1906, 348	80	494	6172	1.87409	0.999973	0.827101	46.7945
SP_PIR_KEYWORDS	disulfide bond	20	19.4175	0.0566743	5222, 5445, 55118, 136, 11243, 2263, 2690, 7296, 1113, 56999, 650, 1906, 5028, 3512, 3481, 118429, 183, 419, 7852, 10468	103	1079	8445	1.51975	1	0.748622	53.8433
UP_SEQ_FEATURE	disulfide bond	19	18.4466	0.0677995	5222, 5445, 55118, 136, 11243, 2263, 2690, 7296, 1113, 56999, 650, 1906, 5028, 3512, 3481, 118429, 419, 7852, 10468	103	1031	8439	1.5099	1	0.99921	62.5337
SP_PIR_KEYWORDS	glycoprotein	27	26.2136	0.103102	55118, 6558, 136, 93377, 8613, 360, 3512, 3481, 419, 7852, 10468, 5445, 813, 9445, 2263, 2690, 1113, 650, 56999, 7482, 290, 6857, 348, 5028, 118429, 183, 4609	103	1687	8445	1.31223	1	0.837619	76.3524
SP_PIR_KEYWORDS	signal	21	20.3883	0.172517	5445, 5222, 55118, 813, 11243, 2263, 2690, 1113, 11010, 56999, 650, 7482, 1906, 348, 3512, 3481, 118429, 183, 2878, 419, 10468	103	1330	8445	1.29458	1	0.883656	91.8679
UP_SEQ_FEATURE	signal peptide	21	20.3883	0.17334	5445, 5222, 55118, 813, 11243, 2263, 2690, 1113, 11010, 56999, 650, 7482, 1906, 348, 3512, 3481, 118429, 183, 2878, 419, 10468	103	1330	8439	1.29366	1	0.999984	93.0183
Annotation Cluster 10	Enrichment Score: 1.3518680756306611
Category	Term	Count	%	PValue	Genes	List Total	Pop Hits	Pop Total	Fold Enrichment	Bonferroni	Benjamini	FDR
GOTERM_BP_FAT	GO:0051353~positive regulation of oxidoreductase activity	5	4.85437	1.64929e-05	3481, 183, 3553, 1906, 348	85	13	6549	29.6335	0.0244521	0.0244521	0.0274022
GOTERM_BP_FAT	GO:0051341~regulation of oxidoreductase activity	5	4.85437	0.000154505	3481, 183, 3553, 1906, 348	85	22	6549	17.5107	0.206998	0.0563334	0.256426
GOTERM_BP_FAT	GO:0042325~regulation of phosphorylation	12	11.6505	0.00103938	28984, 3985, 3481, 183, 136, 5577, 7852, 2690, 3553, 650, 1906, 348	85	288	6549	3.21029	0.790058	0.177261	1.71317
GOTERM_BP_FAT	GO:0001944~vasculature development	9	8.73786	0.0011284	183, 7852, 7763, 4435, 3553, 290, 8613, 1906, 348	85	164	6549	4.22819	0.816343	0.171633	1.8586
GOTERM_BP_FAT	GO:0051174~regulation of phosphorus metabolic process	12	11.6505	0.0014098	28984, 3985, 3481, 183, 136, 5577, 7852, 2690, 3553, 650, 1906, 348	85	299	6549	3.09219	0.879681	0.175114	2.31702
GOTERM_BP_FAT	GO:0019220~regulation of phosphate metabolic process	12	11.6505	0.0014098	28984, 3985, 3481, 183, 136, 5577, 7852, 2690, 3553, 650, 1906, 348	85	299	6549	3.09219	0.879681	0.175114	2.31702
GOTERM_BP_FAT	GO:0060341~regulation of cellular localization	8	7.76699	0.00236875	3481, 183, 136, 10468, 3553, 4792, 1906, 6857	85	144	6549	4.28039	0.971553	0.224514	3.86412
GOTERM_BP_FAT	GO:0001932~regulation of protein amino acid phosphorylation	7	6.79612	0.00262836	3481, 183, 5577, 2690, 3553, 650, 1906	85	109	6549	4.94798	0.980752	0.218779	4.27897
GOTERM_BP_FAT	GO:0051046~regulation of secretion	7	6.79612	0.00275191	3481, 183, 136, 10468, 3553, 1906, 6857	85	110	6549	4.90299	0.984018	0.215974	4.47582
GOTERM_BP_FAT	GO:0051240~positive regulation of multicellular organismal process	8	7.76699	0.00287199	3481, 183, 136, 10468, 2690, 3553, 650, 1906	85	149	6549	4.13675	0.986661	0.213243	4.66676
GOTERM_BP_FAT	GO:0032770~positive regulation of monooxygenase activity	3	2.91262	0.00327431	3481, 3553, 348	85	7	6549	33.0202	0.992721	0.218187	5.30391
GOTERM_BP_FAT	GO:0043405~regulation of MAP kinase activity	6	5.82524	0.00367844	136, 7852, 2690, 3553, 1906, 348	85	81	6549	5.70719	0.99604	0.23157	5.9399
GOTERM_BP_FAT	GO:0007166~cell surface receptor linked signal transduction	18	17.4757	0.00395404	6558, 136, 2263, 7763, 4435, 2690, 650, 7482, 1906, 348, 5028, 2781, 3481, 183, 7852, 10468, 2353, 4792	85	664	6549	2.08863	0.997386	0.236856	6.37131
GOTERM_BP_FAT	GO:0001501~skeletal system development	8	7.76699	0.0044146	3481, 3205, 11243, 7763, 2690, 650, 1906, 4609	85	161	6549	3.82843	0.998694	0.241724	7.08811
GOTERM_BP_FAT	GO:0001568~blood vessel development	8	7.76699	0.0044146	183, 7852, 4435, 3553, 290, 8613, 1906, 348	85	161	6549	3.82843	0.998694	0.241724	7.08811
GOTERM_BP_FAT	GO:0001934~positive regulation of protein amino acid phosphorylation	5	4.85437	0.0052262	3481, 183, 2690, 3553, 650	85	55	6549	7.00428	0.999616	0.269922	8.3387
GOTERM_BP_FAT	GO:0051050~positive regulation of transport	7	6.79612	0.00538031	5028, 3481, 136, 3553, 4792, 1906, 348	85	126	6549	4.28039	0.999696	0.267614	8.57437
GOTERM_BP_FAT	GO:0045859~regulation of protein kinase activity	9	8.73786	0.00557328	28984, 3481, 136, 5577, 7852, 2690, 3553, 1906, 348	85	212	6549	3.27087	0.999773	0.267066	8.86867
GOTERM_BP_FAT	GO:0045834~positive regulation of lipid metabolic process	4	3.8835	0.0058481	3481, 183, 3553, 348	85	29	6549	10.6272	0.99985	0.269788	9.28626
GOTERM_BP_FAT	GO:0019725~cellular homeostasis	10	9.70874	0.00688467	183, 6558, 7852, 7296, 3553, 2512, 1906, 4609, 4155, 348	85	267	6549	2.88566	0.999969	0.292243	10.8452
GOTERM_BP_FAT	GO:0042327~positive regulation of phosphorylation	5	4.85437	0.00711992	3481, 183, 2690, 3553, 650	85	60	6549	6.42059	0.999978	0.277478	11.1955
GOTERM_BP_FAT	GO:0043406~positive regulation of MAP kinase activity	5	4.85437	0.00711992	136, 7852, 2690, 3553, 1906	85	60	6549	6.42059	0.999978	0.277478	11.1955
GOTERM_BP_FAT	GO:0043549~regulation of kinase activity	9	8.73786	0.00712213	28984, 3481, 136, 5577, 7852, 2690, 3553, 1906, 348	85	221	6549	3.13766	0.999978	0.270609	11.1988
GOTERM_BP_FAT	GO:0043085~positive regulation of catalytic activity	11	10.6796	0.00729957	5028, 3481, 183, 136, 5577, 7852, 2690, 3553, 1906, 4609, 348	85	319	6549	2.6568	0.999983	0.269624	11.4621
GOTERM_BP_FAT	GO:0045860~positive regulation of protein kinase activity	7	6.79612	0.00749165	3481, 136, 5577, 7852, 2690, 3553, 1906	85	135	6549	3.99503	0.999987	0.269142	11.7464
GOTERM_BP_FAT	GO:0007588~excretion	4	3.8835	0.00772241	183, 136, 1906, 360	85	32	6549	9.63088	0.999991	0.269843	12.0867
GOTERM_BP_FAT	GO:0045937~positive regulation of phosphate metabolic process	5	4.85437	0.00798936	3481, 183, 2690, 3553, 650	85	62	6549	6.21347	0.999994	0.271558	12.4789
GOTERM_BP_FAT	GO:0010562~positive regulation of phosphorus metabolic process	5	4.85437	0.00798936	3481, 183, 2690, 3553, 650	85	62	6549	6.21347	0.999994	0.271558	12.4789
GOTERM_BP_FAT	GO:0030003~cellular cation homeostasis	7	6.79612	0.0080323	183, 7852, 3553, 2512, 1906, 4609, 348	85	137	6549	3.93671	0.999994	0.266838	12.5418
GOTERM_BP_FAT	GO:0048514~blood vessel morphogenesis	7	6.79612	0.00831295	183, 7852, 4435, 3553, 290, 1906, 348	85	138	6549	3.90818	0.999996	0.263324	12.9521
GOTERM_BP_FAT	GO:0051048~negative regulation of secretion	4	3.8835	0.00841701	3481, 10468, 3553, 1906	85	33	6549	9.33904	0.999997	0.260722	13.1037
GOTERM_BP_FAT	GO:0051338~regulation of transferase activity	9	8.73786	0.00853725	28984, 3481, 136, 5577, 7852, 2690, 3553, 1906, 348	85	228	6549	3.04133	0.999997	0.258655	13.2786
GOTERM_BP_FAT	GO:0033674~positive regulation of kinase activity	7	6.79612	0.00919731	3481, 136, 5577, 7852, 2690, 3553, 1906	85	141	6549	3.82503	0.999999	0.260293	14.233
GOTERM_BP_FAT	GO:0007267~cell-cell signaling	10	9.70874	0.00949636	3481, 1728, 223, 183, 3553, 650, 1906, 6857, 4155, 348	85	281	6549	2.74189	0.999999	0.262675	14.6622
GOTERM_BP_FAT	GO:0051347~positive regulation of transferase activity	7	6.79612	0.0108183	3481, 136, 5577, 7852, 2690, 3553, 1906	85	146	6549	3.69404	1	0.273947	16.5351
GOTERM_BP_FAT	GO:0050880~regulation of blood vessel size	4	3.8835	0.0115552	183, 136, 1906, 348	85	37	6549	8.32941	1	0.285011	17.5623
GOTERM_BP_FAT	GO:0030162~regulation of proteolysis	4	3.8835	0.0115552	3481, 3553, 6880, 348	85	37	6549	8.32941	1	0.285011	17.5623
GOTERM_BP_FAT	GO:0035150~regulation of tube size	4	3.8835	0.0115552	183, 136, 1906, 348	85	37	6549	8.32941	1	0.285011	17.5623
GOTERM_BP_FAT	GO:0006873~cellular ion homeostasis	8	7.76699	0.0122004	183, 7852, 3553, 2512, 1906, 4609, 4155, 348	85	195	6549	3.1609	1	0.293654	18.4519
GOTERM_BP_FAT	GO:0048754~branching morphogenesis of a tube	4	3.8835	0.0133446	183, 7852, 650, 1906	85	39	6549	7.90226	1	0.31163	20.0074
GOTERM_BP_FAT	GO:0031329~regulation of cellular catabolic process	4	3.8835	0.0133446	3481, 3553, 6880, 348	85	39	6549	7.90226	1	0.31163	20.0074
GOTERM_BP_FAT	GO:0032768~regulation of monooxygenase activity	3	2.91262	0.0133858	3481, 3553, 348	85	14	6549	16.5101	1	0.307729	20.0629
GOTERM_BP_FAT	GO:0060284~regulation of cell development	6	5.82524	0.0136597	694, 3481, 650, 1906, 4155, 348	85	111	6549	4.16471	1	0.308334	20.4309
GOTERM_BP_FAT	GO:0055080~cation homeostasis	7	6.79612	0.0138197	183, 7852, 3553, 2512, 1906, 4609, 348	85	154	6549	3.50214	1	0.306813	20.645
GOTERM_BP_FAT	GO:0055082~cellular chemical homeostasis	8	7.76699	0.0138793	183, 7852, 3553, 2512, 1906, 4609, 4155, 348	85	200	6549	3.08188	1	0.30351	20.7246
GOTERM_BP_FAT	GO:0003018~vascular process in circulatory system	4	3.8835	0.0142953	183, 136, 1906, 348	85	40	6549	7.70471	1	0.30671	21.2786
GOTERM_BP_FAT	GO:0044093~positive regulation of molecular function	11	10.6796	0.0162272	5028, 3481, 183, 136, 5577, 7852, 2690, 3553, 1906, 4609, 348	85	360	6549	2.35422	1	0.3314	23.8034
GOTERM_BP_FAT	GO:0032270~positive regulation of cellular protein metabolic process	7	6.79612	0.0164235	3481, 183, 2690, 3553, 650, 4792, 348	85	160	6549	3.37081	1	0.330289	24.0557
GOTERM_BP_FAT	GO:0019216~regulation of lipid metabolic process	5	4.85437	0.016777	2180, 3481, 183, 3553, 348	85	77	6549	5.00306	1	0.331761	24.508
GOTERM_BP_FAT	GO:0030005~cellular di-, tri-valent inorganic cation homeostasis	6	5.82524	0.0168289	7852, 3553, 2512, 1906, 4609, 348	85	117	6549	3.95113	1	0.328371	24.5742
GOTERM_BP_FAT	GO:0007186~G-protein coupled receptor protein signaling pathway	9	8.73786	0.0170972	5028, 2781, 3481, 183, 6558, 136, 7852, 1906, 348	85	258	6549	2.68769	1	0.328492	24.9155
GOTERM_BP_FAT	GO:0010594~regulation of endothelial cell migration	3	2.91262	0.0173616	183, 1906, 348	85	16	6549	14.4463	1	0.328547	25.2504
GOTERM_BP_FAT	GO:0000187~activation of MAPK activity	4	3.8835	0.0173734	136, 7852, 2690, 3553	85	43	6549	7.16717	1	0.324727	25.2654
GOTERM_BP_FAT	GO:0001763~morphogenesis of a branching structure	4	3.8835	0.0173734	183, 7852, 650, 1906	85	43	6549	7.16717	1	0.324727	25.2654
GOTERM_BP_FAT	GO:0045833~negative regulation of lipid metabolic process	3	2.91262	0.0195143	3481, 3553, 348	85	17	6549	13.5965	1	0.348647	27.9255
GOTERM_BP_FAT	GO:0045840~positive regulation of mitosis	3	2.91262	0.0195143	3481, 3553, 1906	85	17	6549	13.5965	1	0.348647	27.9255
GOTERM_BP_FAT	GO:0046888~negative regulation of hormone secretion	3	2.91262	0.0195143	10468, 3553, 1906	85	17	6549	13.5965	1	0.348647	27.9255
GOTERM_BP_FAT	GO:0051785~positive regulation of nuclear division	3	2.91262	0.0195143	3481, 3553, 1906	85	17	6549	13.5965	1	0.348647	27.9255
GOTERM_BP_FAT	GO:0001558~regulation of cell growth	6	5.82524	0.0198175	694, 3481, 183, 79602, 6880, 348	85	122	6549	3.7892	1	0.348977	28.2949
GOTERM_BP_FAT	GO:0035295~tube development	6	5.82524	0.0198175	1050, 183, 7852, 4781, 650, 1906	85	122	6549	3.7892	1	0.348977	28.2949
GOTERM_BP_FAT	GO:0040008~regulation of growth	8	7.76699	0.0203672	10933, 694, 3481, 183, 2690, 79602, 6880, 348	85	216	6549	2.85359	1	0.352751	28.9602
GOTERM_BP_FAT	GO:0050801~ion homeostasis	8	7.76699	0.0208328	183, 7852, 3553, 2512, 1906, 4609, 4155, 348	85	217	6549	2.84044	1	0.355251	29.5192
GOTERM_BP_FAT	GO:0051247~positive regulation of protein metabolic process	7	6.79612	0.0209393	3481, 183, 2690, 3553, 650, 4792, 348	85	169	6549	3.1913	1	0.352812	29.6464
GOTERM_BP_FAT	GO:0055066~di-, tri-valent inorganic cation homeostasis	6	5.82524	0.0211047	7852, 3553, 2512, 1906, 4609, 348	85	124	6549	3.72808	1	0.351222	29.8437
GOTERM_BP_FAT	GO:0032268~regulation of cellular protein metabolic process	10	9.70874	0.0211296	3481, 183, 5577, 2690, 3553, 650, 4792, 6880, 1906, 348	85	321	6549	2.40022	1	0.347801	29.8733
GOTERM_BP_FAT	GO:0045429~positive regulation of nitric oxide biosynthetic process	3	2.91262	0.0217729	3481, 3553, 1906	85	18	6549	12.8412	1	0.352584	30.6352
GOTERM_BP_FAT	GO:0050727~regulation of inflammatory response	4	3.8835	0.0232645	3481, 183, 136, 348	85	48	6549	6.42059	1	0.367999	32.3719
GOTERM_BP_FAT	GO:0048878~chemical homeostasis	9	8.73786	0.0250202	3481, 183, 7852, 3553, 2512, 1906, 4609, 4155, 348	85	277	6549	2.50333	1	0.374714	34.3638
GOTERM_BP_FAT	GO:0051051~negative regulation of transport	5	4.85437	0.0250755	3481, 10468, 3553, 4792, 1906	85	87	6549	4.42799	1	0.371774	34.4256
GOTERM_BP_FAT	GO:0045428~regulation of nitric oxide biosynthetic process	3	2.91262	0.029154	3481, 3553, 1906	85	21	6549	11.0067	1	0.389485	38.8381
GOTERM_BP_FAT	GO:0031331~positive regulation of cellular catabolic process	3	2.91262	0.029154	3481, 3553, 348	85	21	6549	11.0067	1	0.389485	38.8381
GOTERM_BP_FAT	GO:0048584~positive regulation of response to stimulus	6	5.82524	0.0291626	3481, 183, 136, 3553, 4792, 6880	85	135	6549	3.42431	1	0.386255	38.8471
GOTERM_BP_FAT	GO:0043066~negative regulation of apoptosis	8	7.76699	0.0299264	3481, 183, 7832, 3553, 4792, 6880, 4609, 348	85	234	6549	2.63409	1	0.390862	39.6416
GOTERM_BP_FAT	GO:0019932~second-messenger-mediated signaling	6	5.82524	0.0308109	5028, 2781, 183, 136, 1906, 348	85	137	6549	3.37432	1	0.390106	40.5496
GOTERM_BP_FAT	GO:0043069~negative regulation of programmed cell death	8	7.76699	0.0311487	3481, 183, 7832, 3553, 4792, 6880, 4609, 348	85	236	6549	2.61176	1	0.390289	40.8931
GOTERM_BP_FAT	GO:0045927~positive regulation of growth	4	3.8835	0.0315938	3481, 183, 2690, 6880	85	54	6549	5.70719	1	0.391512	41.3426
GOTERM_BP_FAT	GO:0044057~regulation of system process	7	6.79612	0.0316394	3481, 183, 136, 10468, 3553, 1906, 348	85	186	6549	2.89962	1	0.388862	41.3885
GOTERM_BP_FAT	GO:0060548~negative regulation of cell death	8	7.76699	0.0317724	3481, 183, 7832, 3553, 4792, 6880, 4609, 348	85	237	6549	2.60074	1	0.387092	41.5222
GOTERM_CC_FAT	GO:0005615~extracellular space	10	9.70874	0.0321966	3481, 183, 11243, 2878, 2690, 3553, 650, 7482, 1906, 348	80	347	6172	2.22334	0.998997	0.899916	33.8857
GOTERM_BP_FAT	GO:0006875~cellular metal ion homeostasis	5	4.85437	0.035482	183, 7852, 3553, 1906, 348	85	97	6549	3.9715	1	0.418569	45.1357
GOTERM_BP_FAT	GO:0009894~regulation of catabolic process	4	3.8835	0.0395754	3481, 3553, 6880, 348	85	59	6549	5.22353	1	0.451243	48.8793
GOTERM_BP_FAT	GO:0055065~metal ion homeostasis	5	4.85437	0.0414976	183, 7852, 3553, 1906, 348	85	102	6549	3.77682	1	0.457574	50.553
GOTERM_BP_FAT	GO:0032101~regulation of response to external stimulus	5	4.85437	0.0427662	3481, 183, 136, 1906, 348	85	103	6549	3.74015	1	0.464638	51.6294
GOTERM_BP_FAT	GO:0043410~positive regulation of MAPKKK cascade	3	2.91262	0.0433036	3481, 183, 3553	85	26	6549	8.89005	1	0.462599	52.0786
GOTERM_BP_FAT	GO:0031399~regulation of protein modification process	7	6.79612	0.0436349	3481, 183, 5577, 2690, 3553, 650, 1906	85	201	6549	2.68323	1	0.462095	52.3536
GOTERM_BP_FAT	GO:0000165~MAPKKK cascade	5	4.85437	0.045369	3481, 136, 7852, 2690, 3553	85	105	6549	3.66891	1	0.472379	53.769
GOTERM_BP_FAT	GO:0042592~homeostatic process	11	10.6796	0.0461071	3481, 183, 6558, 7852, 7296, 3553, 2512, 1906, 4609, 4155, 348	85	428	6549	1.98018	1	0.471818	54.3594
GOTERM_BP_FAT	GO:0043408~regulation of MAPKKK cascade	4	3.8835	0.0466284	3481, 183, 3553, 1906	85	63	6549	4.89188	1	0.469682	54.7721
GOTERM_CC_FAT	GO:0044421~extracellular region part	12	11.6505	0.0486818	55118, 3481, 183, 11243, 2878, 2690, 3553, 56999, 650, 7482, 1906, 348	80	494	6172	1.87409	0.999973	0.827101	46.7945
GOTERM_BP_FAT	GO:0030808~regulation of nucleotide biosynthetic process	4	3.8835	0.0522985	2781, 136, 1906, 348	85	66	6549	4.66952	1	0.497983	59.0401
GOTERM_BP_FAT	GO:0030802~regulation of cyclic nucleotide biosynthetic process	4	3.8835	0.0522985	2781, 136, 1906, 348	85	66	6549	4.66952	1	0.497983	59.0401
GOTERM_BP_FAT	GO:0046890~regulation of lipid biosynthetic process	3	2.91262	0.0527846	3481, 183, 348	85	29	6549	7.97039	1	0.498328	59.3879
GOTERM_BP_FAT	GO:0030334~regulation of cell migration	5	4.85437	0.0537004	3481, 183, 7852, 1906, 348	85	111	6549	3.47059	1	0.49863	60.0354
GOTERM_BP_FAT	GO:0007243~protein kinase cascade	7	6.79612	0.0550581	3481, 136, 7852, 2690, 3553, 4792, 1906	85	213	6549	2.53206	1	0.504662	60.9776
GOTERM_BP_FAT	GO:0050731~positive regulation of peptidyl-tyrosine phosphorylation	3	2.91262	0.056095	3481, 183, 2690	85	30	6549	7.70471	1	0.508486	61.6831
GOTERM_BP_FAT	GO:0030799~regulation of cyclic nucleotide metabolic process	4	3.8835	0.0562558	2781, 136, 1906, 348	85	68	6549	4.53218	1	0.506667	61.7914
GOTERM_BP_FAT	GO:0032147~activation of protein kinase activity	4	3.8835	0.0562558	3481, 5577, 2690, 1906	85	68	6549	4.53218	1	0.506667	61.7914
GOTERM_BP_FAT	GO:0009896~positive regulation of catabolic process	3	2.91262	0.0594766	3481, 3553, 348	85	31	6549	7.45617	1	0.52396	63.9014
GOTERM_BP_FAT	GO:0006954~inflammatory response	6	5.82524	0.060121	3481, 7852, 64332, 3553, 2353, 650	85	165	6549	2.80171	1	0.52505	64.3102
GOTERM_BP_FAT	GO:0006140~regulation of nucleotide metabolic process	4	3.8835	0.062452	2781, 136, 1906, 348	85	71	6549	4.34068	1	0.536161	65.7528
GOTERM_BP_FAT	GO:0035239~tube morphogenesis	4	3.8835	0.062452	183, 7852, 650, 1906	85	71	6549	4.34068	1	0.536161	65.7528
GOTERM_BP_FAT	GO:0003013~circulatory system process	5	4.85437	0.0660186	183, 136, 1113, 1906, 348	85	119	6549	3.23727	1	0.548284	67.8546
GOTERM_BP_FAT	GO:0008015~blood circulation	5	4.85437	0.0660186	183, 136, 1113, 1906, 348	85	119	6549	3.23727	1	0.548284	67.8546
GOTERM_BP_FAT	GO:0051094~positive regulation of developmental process	6	5.82524	0.0720628	694, 3481, 183, 10468, 3553, 650	85	174	6549	2.6568	1	0.572785	71.142
GOTERM_BP_FAT	GO:0040012~regulation of locomotion	5	4.85437	0.0726874	3481, 183, 7852, 1906, 348	85	123	6549	3.13199	1	0.573299	71.4631
GOTERM_BP_FAT	GO:0051270~regulation of cell motion	5	4.85437	0.0744069	3481, 183, 7852, 1906, 348	85	124	6549	3.10674	1	0.576707	72.3297
GOTERM_BP_FAT	GO:0060348~bone development	4	3.8835	0.0757488	3481, 11243, 2690, 650	85	77	6549	4.00244	1	0.580789	72.9888
GOTERM_BP_FAT	GO:0051216~cartilage development	3	2.91262	0.0773708	2690, 650, 1906	85	36	6549	6.42059	1	0.586161	73.7658
GOTERM_MF_FAT	GO:0008083~growth factor activity	4	3.8835	0.0791134	3481, 183, 3553, 650	81	78	6200	3.92529	1	0.937061	66.7952
GOTERM_BP_FAT	GO:0042176~regulation of protein catabolic process	3	2.91262	0.0811317	3553, 6880, 348	85	37	6549	6.24706	1	0.601606	75.4873
GOTERM_BP_FAT	GO:0019935~cyclic-nucleotide-mediated signaling	4	3.8835	0.0828306	2781, 183, 136, 348	85	80	6549	3.85235	1	0.604264	76.2296
GOTERM_BP_FAT	GO:0007088~regulation of mitosis	3	2.91262	0.0849483	3481, 3553, 1906	85	38	6549	6.08266	1	0.611337	77.1254
GOTERM_BP_FAT	GO:0051783~regulation of nuclear division	3	2.91262	0.0849483	3481, 3553, 1906	85	38	6549	6.08266	1	0.611337	77.1254
GOTERM_BP_FAT	GO:0031401~positive regulation of protein modification process	5	4.85437	0.0870161	3481, 183, 2690, 3553, 650	85	131	6549	2.94073	1	0.617987	77.9693
GOTERM_BP_FAT	GO:0009967~positive regulation of signal transduction	6	5.82524	0.0898747	3481, 183, 4435, 2690, 3553, 650	85	186	6549	2.48539	1	0.625298	79.088
GOTERM_BP_FAT	GO:0008284~positive regulation of cell proliferation	7	6.79612	0.0923095	3481, 183, 23512, 2263, 3553, 1906, 4609	85	244	6549	2.21037	1	0.630541	79.9984
GOTERM_BP_FAT	GO:0045787~positive regulation of cell cycle	3	2.91262	0.0967133	3481, 3553, 1906	85	41	6549	5.63759	1	0.638622	81.5512
GOTERM_BP_FAT	GO:0046883~regulation of hormone secretion	3	2.91262	0.100733	10468, 3553, 1906	85	42	6549	5.50336	1	0.649532	82.8692
GOTERM_BP_FAT	GO:0006874~cellular calcium ion homeostasis	4	3.8835	0.103033	7852, 3553, 1906, 348	85	88	6549	3.50214	1	0.653484	83.5828
GOTERM_BP_FAT	GO:0040014~regulation of multicellular organism growth	3	2.91262	0.1048	183, 2690, 348	85	43	6549	5.37538	1	0.655344	84.1119
GOTERM_BP_FAT	GO:0050730~regulation of peptidyl-tyrosine phosphorylation	3	2.91262	0.10891	3481, 183, 2690	85	44	6549	5.25321	1	0.665611	85.2817
GOTERM_BP_FAT	GO:0055074~calcium ion homeostasis	4	3.8835	0.111072	7852, 3553, 1906, 348	85	91	6549	3.38668	1	0.67093	85.8638
GOTERM_BP_FAT	GO:0007204~elevation of cytosolic calcium ion concentration	3	2.91262	0.117258	7852, 3553, 1906	85	46	6549	5.02481	1	0.685133	87.4126
GOTERM_BP_FAT	GO:0051235~maintenance of location	3	2.91262	0.121491	3553, 4792, 348	85	47	6549	4.9179	1	0.692206	88.3789
GOTERM_BP_FAT	GO:0001525~angiogenesis	4	3.8835	0.122154	7852, 3553, 290, 1906	85	95	6549	3.24409	1	0.692122	88.5238
GOTERM_BP_FAT	GO:0007242~intracellular signaling cascade	14	13.5922	0.122824	136, 5577, 59345, 2690, 1906, 348, 5028, 3481, 2781, 183, 7852, 79602, 3553, 4792	85	715	6549	1.50861	1	0.689898	88.6686
GOTERM_BP_FAT	GO:0010647~positive regulation of cell communication	6	5.82524	0.124153	3481, 183, 4435, 2690, 3553, 650	85	206	6549	2.24409	1	0.691917	88.9504
GOTERM_BP_FAT	GO:0046903~secretion	5	4.85437	0.12601	183, 136, 1906, 6857, 360	85	150	6549	2.56824	1	0.691295	89.3332
GOTERM_BP_FAT	GO:0007346~regulation of mitotic cell cycle	4	3.8835	0.127843	3481, 3553, 1906, 4609	85	97	6549	3.1772	1	0.694803	89.699
GOTERM_BP_FAT	GO:0001817~regulation of cytokine production	4	3.8835	0.133626	3481, 183, 136, 3553	85	99	6549	3.11301	1	0.701672	90.7771
GOTERM_BP_FAT	GO:0051726~regulation of cell cycle	6	5.82524	0.135487	28984, 3481, 3553, 650, 1906, 4609	85	212	6549	2.18058	1	0.703007	91.1008
GOTERM_BP_FAT	GO:0051241~negative regulation of multicellular organismal process	4	3.8835	0.136552	3481, 136, 1906, 348	85	100	6549	3.08188	1	0.70405	91.2812
GOTERM_BP_FAT	GO:0044092~negative regulation of molecular function	6	5.82524	0.145277	2781, 3481, 1728, 3553, 4792, 348	85	217	6549	2.13033	1	0.718267	92.6352
GOTERM_BP_FAT	GO:0051480~cytosolic calcium ion homeostasis	3	2.91262	0.147622	7852, 3553, 1906	85	53	6549	4.36115	1	0.722538	92.9638
GOTERM_BP_FAT	GO:0010638~positive regulation of organelle organization	3	2.91262	0.147622	3481, 3553, 1906	85	53	6549	4.36115	1	0.722538	92.9638
GOTERM_BP_FAT	GO:0006952~defense response	7	6.79612	0.150897	3481, 136, 7852, 64332, 3553, 2353, 650	85	281	6549	1.91932	1	0.727218	93.3999
GOTERM_BP_FAT	GO:0003012~muscle system process	4	3.8835	0.151506	183, 136, 3553, 1906	85	105	6549	2.93513	1	0.726897	93.478
GOTERM_BP_FAT	GO:0001819~positive regulation of cytokine production	3	2.91262	0.152084	183, 136, 3553	85	54	6549	4.28039	1	0.726505	93.5515
GOTERM_BP_FAT	GO:0006469~negative regulation of protein kinase activity	3	2.91262	0.152084	3481, 3553, 348	85	54	6549	4.28039	1	0.726505	93.5515
GOTERM_BP_FAT	GO:0006796~phosphate metabolic process	11	10.6796	0.152976	3985, 27071, 5166, 136, 2263, 7852, 2690, 3553, 650, 132160, 7385	85	541	6549	1.56658	1	0.726907	93.6633
GOTERM_BP_FAT	GO:0006793~phosphorus metabolic process	11	10.6796	0.152976	3985, 27071, 5166, 136, 2263, 7852, 2690, 3553, 650, 132160, 7385	85	541	6549	1.56658	1	0.726907	93.6633
GOTERM_BP_FAT	GO:0009611~response to wounding	7	6.79612	0.154466	5028, 3481, 7852, 64332, 3553, 2353, 650	85	283	6549	1.90576	1	0.728805	93.846
GOTERM_BP_FAT	GO:0010627~regulation of protein kinase cascade	5	4.85437	0.156278	3481, 183, 2690, 3553, 1906	85	163	6549	2.36341	1	0.731467	94.0615
GOTERM_BP_FAT	GO:0033673~negative regulation of kinase activity	3	2.91262	0.165628	3481, 3553, 348	85	57	6549	4.05511	1	0.741332	95.0653
GOTERM_BP_FAT	GO:0051348~negative regulation of transferase activity	3	2.91262	0.170189	3481, 3553, 348	85	58	6549	3.98519	1	0.749989	95.4949
GOTERM_BP_FAT	GO:0006468~protein amino acid phosphorylation	8	7.76699	0.172614	3985, 5166, 136, 2263, 7852, 2690, 3553, 650	85	357	6549	1.72654	1	0.753664	95.7087
GOTERM_BP_FAT	GO:0030817~regulation of cAMP biosynthetic process	3	2.91262	0.174772	2781, 136, 1906	85	59	6549	3.91765	1	0.755004	95.891
GOTERM_MF_FAT	GO:0005179~hormone activity	3	2.91262	0.176372	3481, 183, 1906	81	59	6200	3.89203	1	0.984788	92.5395
GOTERM_BP_FAT	GO:0010740~positive regulation of protein kinase cascade	4	3.8835	0.17645	3481, 183, 2690, 3553	85	113	6549	2.72733	1	0.756956	96.0276
GOTERM_BP_FAT	GO:0002697~regulation of immune effector process	3	2.91262	0.183997	3481, 136, 3553	85	61	6549	3.7892	1	0.766221	96.5911
GOTERM_BP_FAT	GO:0008217~regulation of blood pressure	3	2.91262	0.183997	183, 1113, 1906	85	61	6549	3.7892	1	0.766221	96.5911
GOTERM_BP_FAT	GO:0030814~regulation of cAMP metabolic process	3	2.91262	0.183997	2781, 136, 1906	85	61	6549	3.7892	1	0.766221	96.5911
GOTERM_BP_FAT	GO:0030335~positive regulation of cell migration	3	2.91262	0.183997	3481, 183, 1906	85	61	6549	3.7892	1	0.766221	96.5911
GOTERM_BP_FAT	GO:0051047~positive regulation of secretion	3	2.91262	0.188637	3481, 136, 1906	85	62	6549	3.72808	1	0.770784	96.8993
GOTERM_BP_FAT	GO:0043086~negative regulation of catalytic activity	5	4.85437	0.196843	2781, 3481, 1728, 3553, 348	85	179	6549	2.15215	1	0.785085	97.3813
SP_PIR_KEYWORDS	lipoprotein	7	6.79612	0.197119	2781, 136, 123, 419, 3553, 6857, 348	103	324	8445	1.7714	1	0.900672	94.5486
GOTERM_BP_FAT	GO:0051272~positive regulation of cell motion	3	2.91262	0.197964	3481, 183, 1906	85	64	6549	3.61158	1	0.785642	97.4413
GOTERM_BP_FAT	GO:0040017~positive regulation of locomotion	3	2.91262	0.197964	3481, 183, 1906	85	64	6549	3.61158	1	0.785642	97.4413
GOTERM_BP_FAT	GO:0048585~negative regulation of response to stimulus	3	2.91262	0.202649	3481, 3553, 348	85	65	6549	3.55602	1	0.791213	97.6787
GOTERM_BP_FAT	GO:0016310~phosphorylation	9	8.73786	0.214764	3985, 5166, 136, 2263, 7852, 2690, 3553, 650, 7385	85	448	6549	1.54782	1	0.809303	98.2001
GOTERM_BP_FAT	GO:0051223~regulation of protein transport	3	2.91262	0.221511	3481, 3553, 4792	85	69	6549	3.34987	1	0.816037	98.4405
GOTERM_BP_FAT	GO:0010564~regulation of cell cycle process	3	2.91262	0.221511	3481, 3553, 1906	85	69	6549	3.34987	1	0.816037	98.4405
GOTERM_BP_FAT	GO:0007187~G-protein signaling, coupled to cyclic nucleotide second messenger	3	2.91262	0.226251	2781, 183, 136	85	70	6549	3.30202	1	0.819349	98.591
GOTERM_BP_FAT	GO:0070201~regulation of establishment of protein localization	3	2.91262	0.245279	3481, 3553, 4792	85	74	6549	3.12353	1	0.843171	99.0684
GOTERM_BP_FAT	GO:0043065~positive regulation of apoptosis	6	5.82524	0.247635	1728, 183, 9445, 3553, 4609, 348	85	263	6549	1.75773	1	0.845103	99.1156
KEGG_PATHWAY	hsa04060:Cytokine-cytokine receptor interaction	4	3.8835	0.248076	7852, 2690, 3553, 650	47	105	2795	2.26545	1	0.907878	95.5616
GOTERM_BP_FAT	GO:0043068~positive regulation of programmed cell death	6	5.82524	0.252485	1728, 183, 9445, 3553, 4609, 348	85	265	6549	1.74446	1	0.849061	99.2057
GOTERM_BP_FAT	GO:0050804~regulation of synaptic transmission	3	2.91262	0.254822	183, 1906, 348	85	76	6549	3.04133	1	0.849654	99.246
GOTERM_BP_FAT	GO:0010942~positive regulation of cell death	6	5.82524	0.257361	1728, 183, 9445, 3553, 4609, 348	85	267	6549	1.73139	1	0.851714	99.2875
GOTERM_BP_FAT	GO:0043627~response to estrogen stimulus	3	2.91262	0.259597	4435, 2690, 3553	85	77	6549	3.00183	1	0.853357	99.3224
GOTERM_BP_FAT	GO:0002684~positive regulation of immune system process	4	3.8835	0.260261	136, 3553, 4792, 360	85	138	6549	2.23325	1	0.852999	99.3324
GOTERM_BP_FAT	GO:0006916~anti-apoptosis	4	3.8835	0.267222	3553, 4792, 4609, 348	85	140	6549	2.20134	1	0.860419	99.4295
GOTERM_BP_FAT	GO:0048545~response to steroid hormone stimulus	4	3.8835	0.270711	4435, 2690, 3553, 2353	85	141	6549	2.18573	1	0.863433	99.473
GOTERM_BP_FAT	GO:0045597~positive regulation of cell differentiation	4	3.8835	0.277706	694, 3481, 183, 650	85	143	6549	2.15516	1	0.86927	99.551
GOTERM_BP_FAT	GO:0051969~regulation of transmission of nerve impulse	3	2.91262	0.278705	183, 1906, 348	85	81	6549	2.85359	1	0.869294	99.5612
GOTERM_BP_FAT	GO:0033043~regulation of organelle organization	4	3.8835	0.28472	3481, 3553, 1906, 4609	85	145	6549	2.12544	1	0.871636	99.6182
GOTERM_BP_FAT	GO:0032880~regulation of protein localization	3	2.91262	0.293023	3481, 3553, 4792	85	84	6549	2.75168	1	0.877386	99.6855
GOTERM_BP_FAT	GO:0031644~regulation of neurological system process	3	2.91262	0.297788	183, 1906, 348	85	85	6549	2.71931	1	0.880273	99.7189
GOTERM_BP_FAT	GO:0008219~cell death	8	7.76699	0.29854	3481, 9445, 7262, 7852, 3553, 4792, 4609, 51747	85	423	6549	1.45715	1	0.880027	99.7239
GOTERM_BP_FAT	GO:0016265~death	8	7.76699	0.302684	3481, 9445, 7262, 7852, 3553, 4792, 4609, 51747	85	425	6549	1.4503	1	0.882212	99.7498
GOTERM_BP_FAT	GO:0006915~apoptosis	7	6.79612	0.312529	9445, 7262, 7852, 3553, 4792, 4609, 51747	85	359	6549	1.50231	1	0.888884	99.8024
GOTERM_BP_FAT	GO:0001775~cell activation	4	3.8835	0.316446	3481, 183, 7852, 1906	85	154	6549	2.00122	1	0.891608	99.8203
GOTERM_BP_FAT	GO:0012501~programmed cell death	7	6.79612	0.326278	9445, 7262, 7852, 3553, 4792, 4609, 51747	85	365	6549	1.47761	1	0.899508	99.8588
GOTERM_BP_FAT	GO:0050865~regulation of cell activation	3	2.91262	0.377637	136, 3553, 348	85	102	6549	2.26609	1	0.932545	99.9622
GOTERM_BP_FAT	GO:0051130~positive regulation of cellular component organization	3	2.91262	0.418479	3481, 3553, 1906	85	111	6549	2.08235	1	0.950342	99.9878
GOTERM_MF_FAT	GO:0019904~protein domain specific binding	4	3.8835	0.476677	2690, 3553, 650, 6880	81	199	6200	1.53856	1	0.997331	99.9827
GOTERM_BP_FAT	GO:0045321~leukocyte activation	3	2.91262	0.512218	3481, 7852, 1906	85	133	6549	1.7379	1	0.978978	99.9993
SP_PIR_KEYWORDS	disease mutation	11	10.6796	0.669507	3481, 118429, 183, 7390, 9445, 2263, 5264, 2690, 4792, 2512, 348	103	908	8445	0.993274	1	0.997899	100
GOTERM_BP_FAT	GO:0006917~induction of apoptosis	3	2.91262	0.711473	9445, 4609, 348	85	192	6549	1.20386	1	0.998393	100
GOTERM_BP_FAT	GO:0012502~induction of programmed cell death	3	2.91262	0.714185	9445, 4609, 348	85	193	6549	1.19762	1	0.998435	100
Annotation Cluster 11	Enrichment Score: 1.3423892356292582
Category	Term	Count	%	PValue	Genes	List Total	Pop Hits	Pop Total	Fold Enrichment	Bonferroni	Benjamini	FDR
GOTERM_BP_FAT	GO:0043414~biopolymer methylation	4	3.8835	0.0232645	694, 7832, 23512, 2353	85	48	6549	6.42059	1	0.367999	32.3719
GOTERM_BP_FAT	GO:0032259~methylation	4	3.8835	0.0258884	694, 7832, 23512, 2353	85	50	6549	6.16376	1	0.377705	35.3283
GOTERM_BP_FAT	GO:0008213~protein amino acid alkylation	3	2.91262	0.056095	694, 7832, 23512	85	30	6549	7.70471	1	0.508486	61.6831
GOTERM_BP_FAT	GO:0006479~protein amino acid methylation	3	2.91262	0.056095	694, 7832, 23512	85	30	6549	7.70471	1	0.508486	61.6831
GOTERM_BP_FAT	GO:0006730~one-carbon metabolic process	4	3.8835	0.0645855	694, 7832, 23512, 2353	85	72	6549	4.28039	1	0.542935	67.0251
SP_PIR_KEYWORDS	Proto-oncogene	5	4.85437	0.0720912	694, 3205, 23512, 2353, 4609	103	130	8445	3.15347	1	0.780809	62.8975
Annotation Cluster 12	Enrichment Score: 1.3269992655692726
Category	Term	Count	%	PValue	Genes	List Total	Pop Hits	Pop Total	Fold Enrichment	Bonferroni	Benjamini	FDR
GOTERM_BP_FAT	GO:0014070~response to organic cyclic substance	7	6.79612	0.000598144	2180, 7832, 123, 2052, 2690, 3553, 2353	85	82	6549	6.57719	0.59265	0.164409	0.98929
GOTERM_BP_FAT	GO:0051384~response to glucocorticoid stimulus	3	2.91262	0.161089	2690, 3553, 2353	85	56	6549	4.12752	1	0.734165	94.5998
GOTERM_BP_FAT	GO:0031960~response to corticosteroid stimulus	3	2.91262	0.188637	2690, 3553, 2353	85	62	6549	3.72808	1	0.770784	96.8993
GOTERM_BP_FAT	GO:0048545~response to steroid hormone stimulus	4	3.8835	0.270711	4435, 2690, 3553, 2353	85	141	6549	2.18573	1	0.863433	99.473
Annotation Cluster 13	Enrichment Score: 1.320921094462712
Category	Term	Count	%	PValue	Genes	List Total	Pop Hits	Pop Total	Fold Enrichment	Bonferroni	Benjamini	FDR
GOTERM_BP_FAT	GO:0019216~regulation of lipid metabolic process	5	4.85437	0.016777	2180, 3481, 183, 3553, 348	85	77	6549	5.00306	1	0.331761	24.508
GOTERM_BP_FAT	GO:0019217~regulation of fatty acid metabolic process	3	2.91262	0.0700246	2180, 3481, 183	85	34	6549	6.79827	1	0.564743	70.0705
GOTERM_BP_FAT	GO:0010565~regulation of cellular ketone metabolic process	3	2.91262	0.0927411	2180, 3481, 183	85	40	6549	5.77853	1	0.627338	80.1558
Annotation Cluster 14	Enrichment Score: 1.2860685139268218
Category	Term	Count	%	PValue	Genes	List Total	Pop Hits	Pop Total	Fold Enrichment	Bonferroni	Benjamini	FDR
GOTERM_BP_FAT	GO:0008361~regulation of cell size	7	6.79612	0.0086006	694, 3481, 183, 2263, 79602, 6880, 1906	85	139	6549	3.88007	0.999998	0.250327	13.3707
GOTERM_BP_FAT	GO:0001558~regulation of cell growth	6	5.82524	0.0198175	694, 3481, 183, 79602, 6880, 348	85	122	6549	3.7892	1	0.348977	28.2949
GOTERM_BP_FAT	GO:0040008~regulation of growth	8	7.76699	0.0203672	10933, 694, 3481, 183, 2690, 79602, 6880, 348	85	216	6549	2.85359	1	0.352751	28.9602
GOTERM_BP_FAT	GO:0032535~regulation of cellular component size	7	6.79612	0.0302254	694, 3481, 183, 2263, 79602, 6880, 1906	85	184	6549	2.93114	1	0.387427	39.9501
GOTERM_BP_FAT	GO:0045793~positive regulation of cell size	3	2.91262	0.056095	3481, 6880, 1906	85	30	6549	7.70471	1	0.508486	61.6831
GOTERM_BP_FAT	GO:0030308~negative regulation of cell growth	3	2.91262	0.179375	694, 183, 79602	85	60	6549	3.85235	1	0.759874	96.2557
GOTERM_BP_FAT	GO:0045792~negative regulation of cell size	3	2.91262	0.202649	694, 183, 79602	85	65	6549	3.55602	1	0.791213	97.6787
GOTERM_BP_FAT	GO:0045926~negative regulation of growth	3	2.91262	0.240514	694, 183, 79602	85	73	6549	3.16632	1	0.837834	98.9657
Annotation Cluster 15	Enrichment Score: 1.245616992897901
Category	Term	Count	%	PValue	Genes	List Total	Pop Hits	Pop Total	Fold Enrichment	Bonferroni	Benjamini	FDR
SP_PIR_KEYWORDS	oxidoreductase	10	9.70874	0.0217627	1728, 6319, 223, 4200, 2878, 5264, 4190, 7296, 10901, 7385	103	341	8445	2.40441	0.998067	0.647066	25.2908
GOTERM_BP_FAT	GO:0055114~oxidation reduction	11	10.6796	0.0271294	1728, 6319, 223, 4200, 2878, 5264, 4190, 7296, 10901, 2512, 7385	85	391	6549	2.16756	1	0.377821	36.6838
SP_PIR_KEYWORDS	nad	5	4.85437	0.0475768	1728, 223, 4200, 419, 4190	103	113	8445	3.62789	0.999999	0.715928	47.5833
GOTERM_MF_FAT	GO:0048037~cofactor binding	6	5.82524	0.0638316	1728, 4200, 7390, 4190, 7296, 1622	81	167	6200	2.75006	1	0.981389	58.6177
GOTERM_MF_FAT	GO:0050662~coenzyme binding	5	4.85437	0.0773602	1728, 4200, 4190, 7296, 1622	81	125	6200	3.06173	1	0.952141	65.9395
GOTERM_MF_FAT	GO:0009055~electron carrier activity	4	3.8835	0.242213	1728, 4200, 5264, 7296	81	132	6200	2.31949	1	0.99047	97.5523
Annotation Cluster 16	Enrichment Score: 1.1958691881504708
Category	Term	Count	%	PValue	Genes	List Total	Pop Hits	Pop Total	Fold Enrichment	Bonferroni	Benjamini	FDR
GOTERM_BP_FAT	GO:0051353~positive regulation of oxidoreductase activity	5	4.85437	1.64929e-05	3481, 183, 3553, 1906, 348	85	13	6549	29.6335	0.0244521	0.0244521	0.0274022
GOTERM_BP_FAT	GO:0051341~regulation of oxidoreductase activity	5	4.85437	0.000154505	3481, 183, 3553, 1906, 348	85	22	6549	17.5107	0.206998	0.0563334	0.256426
GOTERM_BP_FAT	GO:0031328~positive regulation of cellular biosynthetic process	14	13.5922	0.00132657	136, 4435, 650, 6880, 1906, 348, 1050, 3481, 183, 3553, 2353, 4781, 4792, 4609	85	392	6549	2.75168	0.863646	0.180655	2.18163
GOTERM_BP_FAT	GO:0009891~positive regulation of biosynthetic process	14	13.5922	0.00145492	136, 4435, 650, 6880, 1906, 348, 1050, 3481, 183, 3553, 2353, 4781, 4792, 4609	85	396	6549	2.72389	0.887571	0.166498	2.39033
GOTERM_BP_FAT	GO:0060341~regulation of cellular localization	8	7.76699	0.00236875	3481, 183, 136, 10468, 3553, 4792, 1906, 6857	85	144	6549	4.28039	0.971553	0.224514	3.86412
GOTERM_BP_FAT	GO:0051173~positive regulation of nitrogen compound metabolic process	13	12.6214	0.0024855	136, 4435, 650, 6880, 1906, 348, 1050, 3481, 3553, 2353, 4781, 4792, 4609	85	370	6549	2.70706	0.976136	0.22044	4.05089
GOTERM_BP_FAT	GO:0042127~regulation of cell proliferation	15	14.5631	0.00294159	694, 7832, 23512, 2263, 650, 1906, 348, 1050, 3481, 183, 3553, 4781, 2170, 4792, 4609	85	481	6549	2.40271	0.987988	0.207631	4.77728
GOTERM_BP_FAT	GO:0051050~positive regulation of transport	7	6.79612	0.00538031	5028, 3481, 136, 3553, 4792, 1906, 348	85	126	6549	4.28039	0.999696	0.267614	8.57437
GOTERM_BP_FAT	GO:0045834~positive regulation of lipid metabolic process	4	3.8835	0.0058481	3481, 183, 3553, 348	85	29	6549	10.6272	0.99985	0.269788	9.28626
GOTERM_BP_FAT	GO:0030162~regulation of proteolysis	4	3.8835	0.0115552	3481, 3553, 6880, 348	85	37	6549	8.32941	1	0.285011	17.5623
GOTERM_BP_FAT	GO:0031329~regulation of cellular catabolic process	4	3.8835	0.0133446	3481, 3553, 6880, 348	85	39	6549	7.90226	1	0.31163	20.0074
GOTERM_BP_FAT	GO:0045935~positive regulation of nucleobase, nucleoside, nucleotide and nucleic acid metabolic process	11	10.6796	0.014305	1050, 3481, 136, 4435, 4781, 2353, 650, 4792, 6880, 4609, 348	85	353	6549	2.4009	1	0.302635	21.2914
GOTERM_BP_FAT	GO:0032270~positive regulation of cellular protein metabolic process	7	6.79612	0.0164235	3481, 183, 2690, 3553, 650, 4792, 348	85	160	6549	3.37081	1	0.330289	24.0557
GOTERM_BP_FAT	GO:0019216~regulation of lipid metabolic process	5	4.85437	0.016777	2180, 3481, 183, 3553, 348	85	77	6549	5.00306	1	0.331761	24.508
GOTERM_BP_FAT	GO:0051247~positive regulation of protein metabolic process	7	6.79612	0.0209393	3481, 183, 2690, 3553, 650, 4792, 348	85	169	6549	3.1913	1	0.352812	29.6464
GOTERM_BP_FAT	GO:0032268~regulation of cellular protein metabolic process	10	9.70874	0.0211296	3481, 183, 5577, 2690, 3553, 650, 4792, 6880, 1906, 348	85	321	6549	2.40022	1	0.347801	29.8733
GOTERM_BP_FAT	GO:0045449~regulation of transcription	23	22.3301	0.0234997	30827, 694, 3205, 7832, 23512, 11243, 4435, 650, 6880, 10933, 1050, 10589, 3481, 183, 64332, 55628, 84858, 10468, 3553, 4781, 2353, 4792, 4609	85	1123	6549	1.57799	1	0.367211	32.6421
GOTERM_BP_FAT	GO:0032583~regulation of gene-specific transcription	5	4.85437	0.0241523	1050, 3481, 650, 4792, 6880	85	86	6549	4.47948	1	0.371567	33.3862
GOTERM_BP_FAT	GO:0051051~negative regulation of transport	5	4.85437	0.0250755	3481, 10468, 3553, 4792, 1906	85	87	6549	4.42799	1	0.371774	34.4256
GOTERM_BP_FAT	GO:0010604~positive regulation of macromolecule metabolic process	13	12.6214	0.0258981	4435, 2690, 650, 6880, 348, 1050, 3481, 183, 3553, 2353, 4781, 4792, 4609	85	503	6549	1.99128	1	0.374292	35.3389
GOTERM_BP_FAT	GO:0009895~negative regulation of catabolic process	3	2.91262	0.0265957	3481, 3553, 6880	85	20	6549	11.5571	1	0.378741	36.1042
GOTERM_BP_FAT	GO:0006357~regulation of transcription from RNA polymerase II promoter	11	10.6796	0.0267116	1050, 10589, 23512, 10468, 4435, 4781, 2353, 650, 4792, 6880, 4609	85	390	6549	2.17312	1	0.376589	36.2304
GOTERM_BP_FAT	GO:0048584~positive regulation of response to stimulus	6	5.82524	0.0291626	3481, 183, 136, 3553, 4792, 6880	85	135	6549	3.42431	1	0.386255	38.8471
GOTERM_BP_FAT	GO:0043066~negative regulation of apoptosis	8	7.76699	0.0299264	3481, 183, 7832, 3553, 4792, 6880, 4609, 348	85	234	6549	2.63409	1	0.390862	39.6416
GOTERM_BP_FAT	GO:0043069~negative regulation of programmed cell death	8	7.76699	0.0311487	3481, 183, 7832, 3553, 4792, 6880, 4609, 348	85	236	6549	2.61176	1	0.390289	40.8931
GOTERM_BP_FAT	GO:0044057~regulation of system process	7	6.79612	0.0316394	3481, 183, 136, 10468, 3553, 1906, 348	85	186	6549	2.89962	1	0.388862	41.3885
GOTERM_BP_FAT	GO:0060548~negative regulation of cell death	8	7.76699	0.0317724	3481, 183, 7832, 3553, 4792, 6880, 4609, 348	85	237	6549	2.60074	1	0.387092	41.5222
GOTERM_CC_FAT	GO:0044451~nucleoplasm part	10	9.70874	0.0382119	1050, 10933, 30827, 3205, 23512, 11243, 2353, 6880, 4609, 51747	80	358	6172	2.15503	0.999731	0.871932	38.8974
GOTERM_BP_FAT	GO:0009894~regulation of catabolic process	4	3.8835	0.0395754	3481, 3553, 6880, 348	85	59	6549	5.22353	1	0.451243	48.8793
GOTERM_BP_FAT	GO:0045944~positive regulation of transcription from RNA polymerase II promoter	7	6.79612	0.0410358	1050, 4781, 2353, 650, 4792, 6880, 4609	85	198	6549	2.72389	1	0.460229	50.1557
GOTERM_BP_FAT	GO:0010557~positive regulation of macromolecule biosynthetic process	10	9.70874	0.0457883	1050, 3481, 4435, 3553, 4781, 2353, 650, 4792, 6880, 4609	85	369	6549	2.088	1	0.472475	54.1053
GOTERM_BP_FAT	GO:0042981~regulation of apoptosis	12	11.6505	0.0491552	694, 3481, 1728, 183, 7832, 9445, 2690, 3553, 4792, 6880, 4609, 348	85	493	6549	1.87538	1	0.485036	56.7233
GOTERM_BP_FAT	GO:0043067~regulation of programmed cell death	12	11.6505	0.0509672	694, 3481, 1728, 183, 7832, 9445, 2690, 3553, 4792, 6880, 4609, 348	85	496	6549	1.86404	1	0.491809	58.0735
GOTERM_BP_FAT	GO:0010941~regulation of cell death	12	11.6505	0.0528245	694, 3481, 1728, 183, 7832, 9445, 2690, 3553, 4792, 6880, 4609, 348	85	499	6549	1.85284	1	0.49568	59.4163
GOTERM_BP_FAT	GO:0007243~protein kinase cascade	7	6.79612	0.0550581	3481, 136, 7852, 2690, 3553, 4792, 1906	85	213	6549	2.53206	1	0.504662	60.9776
GOTERM_BP_FAT	GO:0010552~positive regulation of specific transcription from RNA polymerase II promoter	3	2.91262	0.0700246	1050, 4792, 6880	85	34	6549	6.79827	1	0.564743	70.0705
GOTERM_CC_FAT	GO:0005667~transcription factor complex	5	4.85437	0.0704484	1050, 3205, 11243, 2353, 6880	80	122	6172	3.16189	1	0.889421	60.294
GOTERM_MF_FAT	GO:0010843~promoter binding	3	2.91262	0.070734	1050, 2353, 6880	81	34	6200	6.75381	1	0.975089	62.5179
GOTERM_BP_FAT	GO:0042176~regulation of protein catabolic process	3	2.91262	0.0811317	3553, 6880, 348	85	37	6549	6.24706	1	0.601606	75.4873
GOTERM_BP_FAT	GO:0031349~positive regulation of defense response	3	2.91262	0.0888188	183, 136, 4792	85	39	6549	5.9267	1	0.623304	78.6811
KEGG_PATHWAY	hsa05200:Pathways in cancer	7	6.79612	0.114546	1050, 2263, 2353, 650, 7482, 4792, 4609	47	204	2795	2.04057	0.999986	0.893376	73.5273
GOTERM_BP_FAT	GO:0045941~positive regulation of transcription	8	7.76699	0.115221	1050, 4435, 4781, 2353, 650, 4792, 6880, 4609	85	320	6549	1.92618	1	0.682865	86.9212
GOTERM_MF_FAT	GO:0043565~sequence-specific DNA binding	7	6.79612	0.118062	1050, 10589, 30827, 3205, 2353, 6880, 4609	81	260	6200	2.06078	1	0.96823	81.3728
SP_PIR_KEYWORDS	transcription regulation	15	14.5631	0.118525	30827, 7832, 3205, 23512, 11243, 6880, 10933, 1050, 10589, 55628, 84858, 64332, 4781, 2353, 4609	103	823	8445	1.49436	1	0.833282	81.2085
GOTERM_BP_FAT	GO:0006355~regulation of transcription, DNA-dependent	14	13.5922	0.119935	30827, 3205, 23512, 4435, 650, 6880, 1050, 10589, 3481, 10468, 2353, 4781, 4792, 4609	85	712	6549	1.51497	1	0.689419	88.0321
GOTERM_BP_FAT	GO:0010628~positive regulation of gene expression	8	7.76699	0.12811	1050, 4435, 4781, 2353, 650, 4792, 6880, 4609	85	329	6549	1.87348	1	0.693523	89.7512
GOTERM_BP_FAT	GO:0045893~positive regulation of transcription, DNA-dependent	7	6.79612	0.135322	1050, 4781, 2353, 650, 4792, 6880, 4609	85	272	6549	1.98283	1	0.704543	91.0725
GOTERM_MF_FAT	GO:0003690~double-stranded DNA binding	3	2.91262	0.140096	4781, 2353, 4609	81	51	6200	4.50254	1	0.969993	86.721
GOTERM_BP_FAT	GO:0051254~positive regulation of RNA metabolic process	7	6.79612	0.140424	1050, 4781, 2353, 650, 4792, 6880, 4609	85	275	6549	1.9612	1	0.710941	91.9087
GOTERM_BP_FAT	GO:0044092~negative regulation of molecular function	6	5.82524	0.145277	2781, 3481, 1728, 3553, 4792, 348	85	217	6549	2.13033	1	0.718267	92.6352
GOTERM_BP_FAT	GO:0051252~regulation of RNA metabolic process	14	13.5922	0.149563	30827, 3205, 23512, 4435, 650, 6880, 1050, 10589, 3481, 10468, 2353, 4781, 4792, 4609	85	741	6549	1.45568	1	0.725679	93.2254
GOTERM_BP_FAT	GO:0010551~regulation of specific transcription from RNA polymerase II promoter	3	2.91262	0.156574	1050, 4792, 6880	85	55	6549	4.20257	1	0.73038	94.096
GOTERM_BP_FAT	GO:0043193~positive regulation of gene-specific transcription	3	2.91262	0.165628	1050, 4792, 6880	85	57	6549	4.05511	1	0.741332	95.0653
UP_SEQ_FEATURE	domain:Leucine-zipper	3	2.91262	0.185263	1050, 2353, 4609	103	65	8439	3.78148	1	0.999905	94.3019
GOTERM_BP_FAT	GO:0051090~regulation of transcription factor activity	3	2.91262	0.188637	183, 3553, 4792	85	62	6549	3.72808	1	0.770784	96.8993
GOTERM_CC_FAT	GO:0005654~nucleoplasm	11	10.6796	0.200262	1050, 10933, 30827, 3205, 23512, 11243, 6634, 2353, 6880, 4609, 51747	80	577	6172	1.4708	1	0.986248	94.0722
GOTERM_BP_FAT	GO:0009968~negative regulation of signal transduction	4	3.8835	0.215786	183, 4435, 3553, 4792	85	125	6549	2.46551	1	0.809561	98.2386
UP_SEQ_FEATURE	DNA-binding region:Basic motif	3	2.91262	0.216131	1050, 2353, 4609	103	72	8439	3.41383	1	0.99995	96.6797
GOTERM_BP_FAT	GO:0051223~regulation of protein transport	3	2.91262	0.221511	3481, 3553, 4792	85	69	6549	3.34987	1	0.816037	98.4405
SP_PIR_KEYWORDS	Transcription	14	13.5922	0.226238	30827, 7832, 3205, 23512, 11243, 6880, 10933, 1050, 10589, 55628, 84858, 64332, 4781, 4609	103	852	8445	1.34726	1	0.925842	96.6588
GOTERM_BP_FAT	GO:0051101~regulation of DNA binding	3	2.91262	0.245279	183, 3553, 4792	85	74	6549	3.12353	1	0.843171	99.0684
GOTERM_BP_FAT	GO:0070201~regulation of establishment of protein localization	3	2.91262	0.245279	3481, 3553, 4792	85	74	6549	3.12353	1	0.843171	99.0684
SP_PIR_KEYWORDS	activator	6	5.82524	0.247472	1050, 30827, 11243, 64332, 4781, 4609	103	279	8445	1.76323	1	0.926075	97.6892
GOTERM_MF_FAT	GO:0043566~structure-specific DNA binding	3	2.91262	0.266605	4781, 2353, 4609	81	78	6200	2.94397	1	0.988427	98.4199
GOTERM_CC_FAT	GO:0043233~organelle lumen	19	18.4466	0.266825	30827, 5166, 813, 4200, 3205, 23512, 11243, 6634, 290, 6880, 51747, 10933, 1050, 3481, 30, 4781, 2353, 1632, 4609	80	1202	6172	1.21951	1	0.99351	98.0243
GOTERM_BP_FAT	GO:0006366~transcription from RNA polymerase II promoter	4	3.8835	0.270711	1050, 11243, 6880, 4609	85	141	6549	2.18573	1	0.863433	99.473
GOTERM_BP_FAT	GO:0010648~negative regulation of cell communication	4	3.8835	0.274206	183, 4435, 3553, 4792	85	142	6549	2.17034	1	0.866383	99.5134
GOTERM_BP_FAT	GO:0032880~regulation of protein localization	3	2.91262	0.293023	3481, 3553, 4792	85	84	6549	2.75168	1	0.877386	99.6855
GOTERM_CC_FAT	GO:0031974~membrane-enclosed lumen	19	18.4466	0.29696	30827, 5166, 813, 4200, 3205, 23512, 11243, 6634, 290, 6880, 51747, 10933, 1050, 3481, 30, 4781, 2353, 1632, 4609	80	1226	6172	1.19564	1	0.990405	98.8379
BIOCARTA	h_mapkPathway:MAPKinase Signaling Pathway	3	2.91262	0.29844	1050, 2353, 4792	20	54	941	2.61389	1	0.999999	97.6237
GOTERM_MF_FAT	GO:0030528~transcription regulator activity	12	11.6505	0.30602	1050, 10589, 30827, 694, 3205, 11243, 4435, 4781, 2353, 650, 6880, 4609	81	710	6200	1.29369	1	0.991743	99.2453
SP_PIR_KEYWORDS	dna-binding	11	10.6796	0.311494	1050, 10589, 30827, 3205, 54617, 55628, 4781, 2353, 6880, 4609, 51747	103	684	8445	1.31856	1	0.955736	99.2887
GOTERM_CC_FAT	GO:0070013~intracellular organelle lumen	18	17.4757	0.321491	30827, 5166, 813, 4200, 3205, 23512, 11243, 6634, 6880, 51747, 10933, 1050, 3481, 30, 4781, 2353, 1632, 4609	80	1170	6172	1.18692	1	0.991885	99.2583
GOTERM_BP_FAT	GO:0006350~transcription	14	13.5922	0.327085	30827, 7832, 3205, 23512, 11243, 6880, 10933, 1050, 10589, 55628, 84858, 64332, 4781, 4609	85	874	6549	1.23416	1	0.899315	99.8616
GOTERM_BP_FAT	GO:0051098~regulation of binding	3	2.91262	0.345099	183, 3553, 4792	85	95	6549	2.43307	1	0.912333	99.9118
GOTERM_BP_FAT	GO:0006351~transcription, DNA-dependent	4	3.8835	0.393973	1050, 11243, 6880, 4609	85	176	6549	1.75107	1	0.940127	99.9757
GOTERM_BP_FAT	GO:0032774~RNA biosynthetic process	4	3.8835	0.397462	1050, 11243, 6880, 4609	85	177	6549	1.74118	1	0.940799	99.9779
GOTERM_MF_FAT	GO:0016563~transcription activator activity	5	4.85437	0.398603	30827, 3205, 11243, 4781, 6880	81	248	6200	1.54321	1	0.99585	99.8888
GOTERM_MF_FAT	GO:0003700~transcription factor activity	7	6.79612	0.42742	1050, 10589, 3205, 4435, 4781, 2353, 4609	81	406	6200	1.31971	1	0.996351	99.9424
GOTERM_MF_FAT	GO:0003677~DNA binding	13	12.6214	0.543657	30827, 3205, 54617, 7763, 4435, 6880, 51747, 1050, 10589, 55628, 2353, 4781, 4609	81	927	6200	1.07342	1	0.999059	99.9972
SP_PIR_KEYWORDS	DNA binding	3	2.91262	0.579481	10589, 3205, 2353	103	160	8445	1.53732	1	0.99627	99.999
GOTERM_CC_FAT	GO:0031981~nuclear lumen	12	11.6505	0.645855	1050, 10933, 30827, 3205, 23512, 11243, 6634, 4781, 2353, 6880, 4609, 51747	80	920	6172	1.0063	1	0.997721	99.9998
SP_PIR_KEYWORDS	nucleus	24	23.301	0.771898	30827, 123036, 3205, 23512, 11243, 54617, 6634, 4435, 7296, 6880, 51747, 28984, 1050, 10933, 3985, 10589, 64332, 55628, 84858, 4781, 2353, 132160, 4792, 4609	103	2135	8445	0.921671	1	0.999444	100
Annotation Cluster 17	Enrichment Score: 1.1578521810133509
Category	Term	Count	%	PValue	Genes	List Total	Pop Hits	Pop Total	Fold Enrichment	Bonferroni	Benjamini	FDR
GOTERM_BP_FAT	GO:0032496~response to lipopolysaccharide	4	3.8835	0.0301104	3553, 2353, 4792, 4257	85	53	6549	5.81487	1	0.389479	39.8316
GOTERM_BP_FAT	GO:0002237~response to molecule of bacterial origin	4	3.8835	0.0430287	3553, 2353, 4792, 4257	85	61	6549	5.05227	1	0.463559	51.8492
GOTERM_BP_FAT	GO:0042493~response to drug	6	5.82524	0.0494103	2180, 123, 3553, 2353, 2170, 4257	85	156	6549	2.96335	1	0.483867	56.9158
GOTERM_BP_FAT	GO:0009617~response to bacterium	4	3.8835	0.0978099	3553, 2353, 4792, 4257	85	86	6549	3.58358	1	0.640545	81.9199
KEGG_PATHWAY	hsa04620:Toll-like receptor signaling pathway	3	2.91262	0.259456	3553, 2353, 4792	47	60	2795	2.9734	1	0.900025	96.2428
Annotation Cluster 18	Enrichment Score: 1.155067967253654
Category	Term	Count	%	PValue	Genes	List Total	Pop Hits	Pop Total	Fold Enrichment	Bonferroni	Benjamini	FDR
GOTERM_BP_FAT	GO:0050877~neurological system process	12	11.6505	0.00441359	1728, 223, 183, 6558, 5577, 5264, 3553, 2353, 6857, 4609, 4155, 348	85	346	6549	2.67215	0.998692	0.250742	7.08654
GOTERM_BP_FAT	GO:0007267~cell-cell signaling	10	9.70874	0.00949636	3481, 1728, 223, 183, 3553, 650, 1906, 6857, 4155, 348	85	281	6549	2.74189	0.999999	0.262675	14.6622
GOTERM_BP_FAT	GO:0007268~synaptic transmission	5	4.85437	0.102616	1728, 223, 6857, 4155, 348	85	139	6549	2.77148	1	0.654304	83.4556
GOTERM_BP_FAT	GO:0019226~transmission of nerve impulse	5	4.85437	0.158713	1728, 223, 6857, 4155, 348	85	164	6549	2.349	1	0.732004	94.34
GOTERM_CC_FAT	GO:0043005~neuron projection	5	4.85437	0.236268	7852, 91978, 6857, 4155, 348	80	194	6172	1.9884	1	0.991256	96.6892
GOTERM_CC_FAT	GO:0042995~cell projection	5	4.85437	0.727794	7852, 91978, 6857, 4155, 348	80	381	6172	1.01247	1	0.99776	100
Annotation Cluster 19	Enrichment Score: 1.1254787315019
Category	Term	Count	%	PValue	Genes	List Total	Pop Hits	Pop Total	Fold Enrichment	Bonferroni	Benjamini	FDR
SP_PIR_KEYWORDS	nad	5	4.85437	0.0475768	1728, 223, 4200, 419, 4190	103	113	8445	3.62789	0.999999	0.715928	47.5833
KEGG_PATHWAY	hsa00620:Pyruvate metabolism	3	2.91262	0.0861737	223, 4200, 4190	47	30	2795	5.94681	0.999749	0.874147	62.637
UP_SEQ_FEATURE	nucleotide phosphate-binding region:NAD	3	2.91262	0.102517	223, 4200, 4190	103	45	8439	5.46214	1	0.999349	77.9628
Annotation Cluster 20	Enrichment Score: 1.1131616996121603
Category	Term	Count	%	PValue	Genes	List Total	Pop Hits	Pop Total	Fold Enrichment	Bonferroni	Benjamini	FDR
GOTERM_BP_FAT	GO:0001944~vasculature development	9	8.73786	0.0011284	183, 7852, 7763, 4435, 3553, 290, 8613, 1906, 348	85	164	6549	4.22819	0.816343	0.171633	1.8586
GOTERM_BP_FAT	GO:0016477~cell migration	5	4.85437	0.163626	694, 7852, 7763, 3553, 8613	85	166	6549	2.32069	1	0.738413	94.8649
GOTERM_BP_FAT	GO:0051674~localization of cell	5	4.85437	0.178692	694, 7852, 7763, 3553, 8613	85	172	6549	2.23974	1	0.760081	96.2036
GOTERM_BP_FAT	GO:0048870~cell motility	5	4.85437	0.178692	694, 7852, 7763, 3553, 8613	85	172	6549	2.23974	1	0.760081	96.2036
GOTERM_BP_FAT	GO:0006928~cell motion	5	4.85437	0.46096	694, 7852, 7763, 3553, 8613	85	271	6549	1.42153	1	0.966132	99.9965
Annotation Cluster 21	Enrichment Score: 1.0837866221371646
Category	Term	Count	%	PValue	Genes	List Total	Pop Hits	Pop Total	Fold Enrichment	Bonferroni	Benjamini	FDR
GOTERM_BP_FAT	GO:0019932~second-messenger-mediated signaling	6	5.82524	0.0308109	5028, 2781, 183, 136, 1906, 348	85	137	6549	3.37432	1	0.390106	40.5496
GOTERM_BP_FAT	GO:0007200~activation of phospholipase C activity by G-protein coupled receptor protein signaling pathway coupled to IP3 second messenger	3	2.91262	0.0433036	5028, 183, 1906	85	26	6549	8.89005	1	0.462599	52.0786
GOTERM_BP_FAT	GO:0007202~activation of phospholipase C activity	3	2.91262	0.0594766	5028, 183, 1906	85	31	6549	7.45617	1	0.52396	63.9014
GOTERM_BP_FAT	GO:0010863~positive regulation of phospholipase C activity	3	2.91262	0.0594766	5028, 183, 1906	85	31	6549	7.45617	1	0.52396	63.9014
GOTERM_BP_FAT	GO:0010517~regulation of phospholipase activity	3	2.91262	0.0664436	5028, 183, 1906	85	33	6549	7.00428	1	0.547896	68.0968
GOTERM_BP_FAT	GO:0010518~positive regulation of phospholipase activity	3	2.91262	0.0664436	5028, 183, 1906	85	33	6549	7.00428	1	0.547896	68.0968
GOTERM_BP_FAT	GO:0060193~positive regulation of lipase activity	3	2.91262	0.0773708	5028, 183, 1906	85	36	6549	6.42059	1	0.586161	73.7658
GOTERM_BP_FAT	GO:0060191~regulation of lipase activity	3	2.91262	0.100733	5028, 183, 1906	85	42	6549	5.50336	1	0.649532	82.8692
GOTERM_BP_FAT	GO:0051345~positive regulation of hydrolase activity	4	3.8835	0.124987	5028, 183, 1906, 4609	85	96	6549	3.21029	1	0.692374	89.1239
GOTERM_BP_FAT	GO:0048015~phosphoinositide-mediated signaling	3	2.91262	0.138783	5028, 183, 1906	85	51	6549	4.53218	1	0.708353	91.6481
GOTERM_BP_FAT	GO:0051336~regulation of hydrolase activity	4	3.8835	0.425178	5028, 183, 1906, 4609	85	185	6549	1.66588	1	0.952371	99.9899
Annotation Cluster 22	Enrichment Score: 1.0699862276827612
Category	Term	Count	%	PValue	Genes	List Total	Pop Hits	Pop Total	Fold Enrichment	Bonferroni	Benjamini	FDR
GOTERM_BP_FAT	GO:0010035~response to inorganic substance	6	5.82524	0.0275716	7390, 2878, 2353, 6857, 360, 348	85	133	6549	3.47581	1	0.379288	37.1603
GOTERM_BP_FAT	GO:0000302~response to reactive oxygen species	3	2.91262	0.147622	2878, 2353, 348	85	53	6549	4.36115	1	0.722538	92.9638
GOTERM_BP_FAT	GO:0006979~response to oxidative stress	4	3.8835	0.151506	1728, 2878, 2353, 348	85	105	6549	2.93513	1	0.726897	93.478
Annotation Cluster 23	Enrichment Score: 1.059128331083553
Category	Term	Count	%	PValue	Genes	List Total	Pop Hits	Pop Total	Fold Enrichment	Bonferroni	Benjamini	FDR
GOTERM_BP_FAT	GO:0010876~lipid localization	5	4.85437	0.0289802	58488, 123, 3553, 2170, 348	85	91	6549	4.23335	1	0.391025	38.6559
GOTERM_MF_FAT	GO:0005319~lipid transporter activity	3	2.91262	0.0857955	58488, 2170, 348	81	38	6200	6.04288	1	0.933395	69.8773
GOTERM_BP_FAT	GO:0006869~lipid transport	4	3.8835	0.0901878	58488, 123, 2170, 348	85	83	6549	3.71311	1	0.624094	79.2072
GOTERM_MF_FAT	GO:0008289~lipid binding	6	5.82524	0.258686	27071, 58488, 2170, 1622, 6857, 348	81	266	6200	1.72654	1	0.991415	98.1758
Annotation Cluster 24	Enrichment Score: 1.0048122806637778
Category	Term	Count	%	PValue	Genes	List Total	Pop Hits	Pop Total	Fold Enrichment	Bonferroni	Benjamini	FDR
GOTERM_BP_FAT	GO:0007276~gamete generation	6	5.82524	0.0821939	3985, 183, 10468, 7852, 91978, 8613	85	181	6549	2.55405	1	0.603937	75.954
GOTERM_BP_FAT	GO:0048610~reproductive cellular process	4	3.8835	0.0926996	7852, 91978, 8613, 4257	85	84	6549	3.66891	1	0.62966	80.1408
GOTERM_BP_FAT	GO:0032504~multicellular organism reproduction	7	6.79612	0.0950946	3985, 183, 10468, 7852, 91978, 650, 8613	85	246	6549	2.1924	1	0.63455	80.9941
GOTERM_BP_FAT	GO:0048609~reproductive process in a multicellular organism	7	6.79612	0.0950946	3985, 183, 10468, 7852, 91978, 650, 8613	85	246	6549	2.1924	1	0.63455	80.9941
GOTERM_BP_FAT	GO:0003006~reproductive developmental process	5	4.85437	0.104652	183, 10468, 7852, 91978, 4257	85	140	6549	2.75168	1	0.657158	84.0684
GOTERM_BP_FAT	GO:0019953~sexual reproduction	6	5.82524	0.129762	3985, 183, 10468, 7852, 91978, 8613	85	209	6549	2.21188	1	0.696425	90.0693
Annotation Cluster 25	Enrichment Score: 0.9722838659208336
Category	Term	Count	%	PValue	Genes	List Total	Pop Hits	Pop Total	Fold Enrichment	Bonferroni	Benjamini	FDR
GOTERM_MF_FAT	GO:0042802~identical protein binding	11	10.6796	0.034425	5445, 1050, 2690, 79602, 1632, 650, 4792, 2512, 4257, 6857, 348	81	405	6200	2.07895	0.999975	0.994957	37.4122
GOTERM_MF_FAT	GO:0046983~protein dimerization activity	8	7.76699	0.130739	3985, 1050, 2690, 79602, 2353, 650, 4257, 348	81	329	6200	1.86123	1	0.970582	84.6524
GOTERM_MF_FAT	GO:0042803~protein homodimerization activity	5	4.85437	0.269073	1050, 2690, 650, 4257, 348	81	204	6200	1.87606	1	0.986468	98.4896
Annotation Cluster 26	Enrichment Score: 0.932084915823325
Category	Term	Count	%	PValue	Genes	List Total	Pop Hits	Pop Total	Fold Enrichment	Bonferroni	Benjamini	FDR
GOTERM_BP_FAT	GO:0060284~regulation of cell development	6	5.82524	0.0136597	694, 3481, 650, 1906, 4155, 348	85	111	6549	4.16471	1	0.308334	20.4309
GOTERM_BP_FAT	GO:0050767~regulation of neurogenesis	3	2.91262	0.30255	650, 4155, 348	85	86	6549	2.68769	1	0.883074	99.749
GOTERM_BP_FAT	GO:0051960~regulation of nervous system development	3	2.91262	0.386818	650, 4155, 348	85	104	6549	2.22251	1	0.936701	99.9705
Annotation Cluster 27	Enrichment Score: 0.9152749418062636
Category	Term	Count	%	PValue	Genes	List Total	Pop Hits	Pop Total	Fold Enrichment	Bonferroni	Benjamini	FDR
GOTERM_BP_FAT	GO:0001656~metanephros development	3	2.91262	0.0265957	183, 4435, 650	85	20	6549	11.5571	1	0.378741	36.1042
GOTERM_BP_FAT	GO:0009967~positive regulation of signal transduction	6	5.82524	0.0898747	3481, 183, 4435, 2690, 3553, 650	85	186	6549	2.48539	1	0.625298	79.088
GOTERM_BP_FAT	GO:0010647~positive regulation of cell communication	6	5.82524	0.124153	3481, 183, 4435, 2690, 3553, 650	85	206	6549	2.24409	1	0.691917	88.9504
GOTERM_BP_FAT	GO:0001822~kidney development	3	2.91262	0.143187	183, 4435, 650	85	52	6549	4.44502	1	0.714591	92.3302
GOTERM_BP_FAT	GO:0001655~urogenital system development	3	2.91262	0.179375	183, 4435, 650	85	60	6549	3.85235	1	0.759874	96.2557
GOTERM_BP_FAT	GO:0060429~epithelium development	3	2.91262	0.422938	183, 4435, 650	85	112	6549	2.06376	1	0.951879	99.9892
Annotation Cluster 28	Enrichment Score: 0.8793400731138369
Category	Term	Count	%	PValue	Genes	List Total	Pop Hits	Pop Total	Fold Enrichment	Bonferroni	Benjamini	FDR
GOTERM_BP_FAT	GO:0048568~embryonic organ development	4	3.8835	0.0562558	1050, 4435, 1906, 4609	85	68	6549	4.53218	1	0.506667	61.7914
GOTERM_BP_FAT	GO:0001701~in utero embryonic development	4	3.8835	0.15763	1050, 7763, 4435, 1906	85	107	6549	2.88026	1	0.731163	94.2177
GOTERM_BP_FAT	GO:0043009~chordate embryonic development	5	4.85437	0.183818	1050, 3205, 7763, 4435, 1906	85	174	6549	2.214	1	0.767475	96.5787
GOTERM_BP_FAT	GO:0009792~embryonic development ending in birth or egg hatching	5	4.85437	0.186399	1050, 3205, 7763, 4435, 1906	85	175	6549	2.20134	1	0.76789	96.7541
Annotation Cluster 29	Enrichment Score: 0.746798608822862
Category	Term	Count	%	PValue	Genes	List Total	Pop Hits	Pop Total	Fold Enrichment	Bonferroni	Benjamini	FDR
GOTERM_BP_FAT	GO:0006633~fatty acid biosynthetic process	3	2.91262	0.125762	6319, 60481, 1906	85	48	6549	4.81544	1	0.692646	89.2829
GOTERM_BP_FAT	GO:0046394~carboxylic acid biosynthetic process	4	3.8835	0.130723	6319, 7390, 60481, 1906	85	98	6549	3.14478	1	0.695178	90.2499
GOTERM_BP_FAT	GO:0016053~organic acid biosynthetic process	4	3.8835	0.130723	6319, 7390, 60481, 1906	85	98	6549	3.14478	1	0.695178	90.2499
GOTERM_BP_FAT	GO:0008610~lipid biosynthetic process	4	3.8835	0.479238	6319, 60481, 2170, 1906	85	201	6549	1.53327	1	0.971228	99.998
Annotation Cluster 30	Enrichment Score: 0.6974216316852218
Category	Term	Count	%	PValue	Genes	List Total	Pop Hits	Pop Total	Fold Enrichment	Bonferroni	Benjamini	FDR
GOTERM_BP_FAT	GO:0006357~regulation of transcription from RNA polymerase II promoter	11	10.6796	0.0267116	1050, 10589, 23512, 10468, 4435, 4781, 2353, 650, 4792, 6880, 4609	85	390	6549	2.17312	1	0.376589	36.2304
GOTERM_BP_FAT	GO:0009890~negative regulation of biosynthetic process	8	7.76699	0.108375	1050, 10589, 3481, 23512, 10468, 650, 1906, 348	85	315	6549	1.95675	1	0.666025	85.1342
GOTERM_BP_FAT	GO:0010605~negative regulation of macromolecule metabolic process	9	8.73786	0.186388	1050, 10589, 3481, 23512, 10468, 650, 6880, 1906, 4609	85	431	6549	1.60887	1	0.769467	96.7533
GOTERM_BP_FAT	GO:0031327~negative regulation of cellular biosynthetic process	7	6.79612	0.200095	1050, 10589, 3481, 23512, 10468, 650, 1906	85	307	6549	1.75677	1	0.788064	97.552
GOTERM_BP_FAT	GO:0045892~negative regulation of transcription, DNA-dependent	5	4.85437	0.212842	1050, 10589, 23512, 10468, 650	85	185	6549	2.08235	1	0.807535	98.1255
GOTERM_BP_FAT	GO:0051253~negative regulation of RNA metabolic process	5	4.85437	0.22371	1050, 10589, 23512, 10468, 650	85	189	6549	2.03828	1	0.818131	98.5121
GOTERM_BP_FAT	GO:0000122~negative regulation of transcription from RNA polymerase II promoter	4	3.8835	0.253326	1050, 10589, 23512, 10468	85	136	6549	2.26609	1	0.848929	99.2204
GOTERM_BP_FAT	GO:0010629~negative regulation of gene expression	6	5.82524	0.284574	1050, 10589, 23512, 10468, 650, 4609	85	278	6549	1.66289	1	0.872552	99.6169
GOTERM_BP_FAT	GO:0045934~negative regulation of nucleobase, nucleoside, nucleotide and nucleic acid metabolic process	6	5.82524	0.287078	1050, 10589, 23512, 10468, 650, 1906	85	279	6549	1.65693	1	0.873142	99.6386
GOTERM_BP_FAT	GO:0051172~negative regulation of nitrogen compound metabolic process	6	5.82524	0.297136	1050, 10589, 23512, 10468, 650, 1906	85	283	6549	1.63351	1	0.880622	99.7146
GOTERM_BP_FAT	GO:0010558~negative regulation of macromolecule biosynthetic process	6	5.82524	0.343054	1050, 10589, 23512, 10468, 650, 1906	85	301	6549	1.53582	1	0.911573	99.9071
GOTERM_BP_FAT	GO:0016481~negative regulation of transcription	5	4.85437	0.394203	1050, 10589, 23512, 10468, 650	85	248	6549	1.55337	1	0.939623	99.9758
Annotation Cluster 31	Enrichment Score: 0.6861724529895077
Category	Term	Count	%	PValue	Genes	List Total	Pop Hits	Pop Total	Fold Enrichment	Bonferroni	Benjamini	FDR
GOTERM_BP_FAT	GO:0003006~reproductive developmental process	5	4.85437	0.104652	183, 10468, 7852, 91978, 4257	85	140	6549	2.75168	1	0.657158	84.0684
GOTERM_BP_FAT	GO:0008406~gonad development	3	2.91262	0.216779	183, 10468, 4257	85	68	6549	3.39913	1	0.809771	98.2753
GOTERM_BP_FAT	GO:0048608~reproductive structure development	3	2.91262	0.235753	183, 10468, 4257	85	72	6549	3.21029	1	0.832318	98.8526
GOTERM_BP_FAT	GO:0045137~development of primary sexual characteristics	3	2.91262	0.240514	183, 10468, 4257	85	73	6549	3.16632	1	0.837834	98.9657
GOTERM_BP_FAT	GO:0007548~sex differentiation	3	2.91262	0.288253	183, 10468, 4257	85	83	6549	2.78483	1	0.873353	99.6483
Annotation Cluster 32	Enrichment Score: 0.6847563490050015
Category	Term	Count	%	PValue	Genes	List Total	Pop Hits	Pop Total	Fold Enrichment	Bonferroni	Benjamini	FDR
GOTERM_BP_FAT	GO:0006006~glucose metabolic process	4	3.8835	0.14247	5166, 3481, 4190, 4609	85	102	6549	3.02145	1	0.714587	92.2228
GOTERM_BP_FAT	GO:0019318~hexose metabolic process	4	3.8835	0.225908	5166, 3481, 4190, 4609	85	128	6549	2.40772	1	0.820191	98.5806
GOTERM_BP_FAT	GO:0005996~monosaccharide metabolic process	4	3.8835	0.274206	5166, 3481, 4190, 4609	85	142	6549	2.17034	1	0.866383	99.5134
Annotation Cluster 33	Enrichment Score: 0.5377097184952946
Category	Term	Count	%	PValue	Genes	List Total	Pop Hits	Pop Total	Fold Enrichment	Bonferroni	Benjamini	FDR
UP_SEQ_FEATURE	repeat:3	3	2.91262	0.229509	419, 6634, 348	103	75	8439	3.27728	1	0.999935	97.39
UP_SEQ_FEATURE	repeat:1	3	2.91262	0.323648	419, 6634, 348	103	96	8439	2.56038	1	0.999988	99.5781
UP_SEQ_FEATURE	repeat:2	3	2.91262	0.328094	419, 6634, 348	103	97	8439	2.53398	1	0.999979	99.6152
Annotation Cluster 34	Enrichment Score: 0.5181583822737569
Category	Term	Count	%	PValue	Genes	List Total	Pop Hits	Pop Total	Fold Enrichment	Bonferroni	Benjamini	FDR
SP_PIR_KEYWORDS	lipoprotein	7	6.79612	0.197119	2781, 136, 123, 419, 3553, 6857, 348	103	324	8445	1.7714	1	0.900672	94.5486
UP_SEQ_FEATURE	lipid moiety-binding region:S-palmitoyl cysteine	3	2.91262	0.341384	2781, 136, 6857	103	100	8439	2.45796	1	0.999976	99.709
SP_PIR_KEYWORDS	palmitate	3	2.91262	0.414527	2781, 136, 6857	103	117	8445	2.10232	1	0.981701	99.917
Annotation Cluster 35	Enrichment Score: 0.45271252428772396
Category	Term	Count	%	PValue	Genes	List Total	Pop Hits	Pop Total	Fold Enrichment	Bonferroni	Benjamini	FDR
UCSC_TFBS	CHX10	43	41.7476	0.203214	55118, 58488, 6558, 54617, 5577, 93377, 7296, 11010, 79726, 8613, 3481, 1728, 6319, 55628, 64332, 79602, 4781, 4155, 57162, 5445, 222389, 27071, 123036, 4200, 7832, 3205, 60481, 2263, 2690, 6817, 56999, 650, 7482, 6857, 51747, 2180, 2781, 118429, 91947, 84858, 2353, 2512, 7385	103	3097	8425	1.13569	1	0.837545	93.8435
UCSC_TFBS	CART1	46	44.6602	0.310093	55118, 6558, 54617, 5577, 1915, 59345, 11010, 8613, 3512, 3481, 1728, 7852, 10468, 55628, 64332, 10901, 3553, 79602, 4781, 57162, 5445, 222389, 123036, 30827, 4200, 3205, 60481, 9445, 2263, 4190, 2690, 56999, 650, 7482, 6857, 51747, 28984, 2180, 118429, 91947, 55652, 84858, 2353, 10144, 7385, 4609	103	3475	8425	1.08277	1	0.861892	98.9486
UCSC_TFBS	S8	39	37.8641	0.695691	55118, 6558, 2052, 5577, 7296, 79726, 5636, 8613, 360, 3481, 7852, 10468, 55628, 64332, 10901, 79602, 4781, 57162, 5445, 222389, 27071, 3205, 60481, 2263, 2690, 56999, 650, 7482, 6857, 6880, 51747, 10933, 2180, 2781, 118429, 2353, 10144, 7385, 4609	103	3307	8425	0.964635	1	0.912381	100
Annotation Cluster 36	Enrichment Score: 0.3943132367986973
Category	Term	Count	%	PValue	Genes	List Total	Pop Hits	Pop Total	Fold Enrichment	Bonferroni	Benjamini	FDR
SP_PIR_KEYWORDS	transducer	5	4.85437	0.123783	5028, 2781, 136, 7852, 59345	103	158	8445	2.59463	1	0.832548	82.6408
SP_PIR_KEYWORDS	G protein-coupled receptor	3	2.91262	0.134144	5028, 136, 7852	103	53	8445	4.64096	1	0.844231	85.1722
INTERPRO	IPR017452:GPCR, rhodopsin-like superfamily	3	2.91262	0.365726	5028, 136, 7852	97	103	7752	2.32769	1	1	99.7529
INTERPRO	IPR000276:7TM GPCR, rhodopsin-like	3	2.91262	0.374646	5028, 136, 7852	97	105	7752	2.28336	1	1	99.795
PIR_SUPERFAMILY	PIRSF800006:rhodopsin-like G protein-coupled receptors	3	2.91262	0.475457	5028, 136, 7852	61	99	3739	1.85743	1	1	99.9018
SP_PIR_KEYWORDS	g-protein coupled receptor	3	2.91262	0.47985	5028, 136, 7852	103	133	8445	1.84941	1	0.987964	99.9827
KEGG_PATHWAY	hsa04080:Neuroactive ligand-receptor interaction	3	2.91262	0.521503	5028, 136, 2690	47	105	2795	1.69909	1	0.985569	99.9682
GOTERM_CC_FAT	GO:0005887~integral to plasma membrane	7	6.79612	0.666788	5028, 6558, 136, 419, 7852, 2690, 290	80	521	6172	1.03656	1	0.997762	99.9999
GOTERM_CC_FAT	GO:0031226~intrinsic to plasma membrane	7	6.79612	0.686862	5028, 6558, 136, 419, 7852, 2690, 290	80	532	6172	1.01513	1	0.997071	100
UP_SEQ_FEATURE	topological domain:Extracellular	8	7.76699	0.919449	5028, 118429, 136, 2263, 7852, 2690, 79602, 360	103	882	8439	0.743148	1	1	100
Annotation Cluster 37	Enrichment Score: 0.39081014128859054
Category	Term	Count	%	PValue	Genes	List Total	Pop Hits	Pop Total	Fold Enrichment	Bonferroni	Benjamini	FDR
SP_PIR_KEYWORDS	microsome	3	2.91262	0.11404	2180, 2052, 4257	103	48	8445	5.12439	1	0.836325	79.9011
GOTERM_CC_FAT	GO:0000267~cell fraction	11	10.6796	0.270549	3985, 2180, 183, 6558, 2878, 2052, 5577, 4190, 2353, 290, 4257	80	622	6172	1.36439	1	0.991387	98.1475
SP_PIR_KEYWORDS	endoplasmic reticulum	7	6.79612	0.438582	2180, 813, 6319, 118429, 60481, 2052, 4257	103	439	8445	1.30736	1	0.985062	99.9524
GOTERM_CC_FAT	GO:0005792~microsome	3	2.91262	0.51124	2180, 2052, 4257	80	133	6172	1.74023	1	0.997623	99.9883
GOTERM_CC_FAT	GO:0042598~vesicular fraction	3	2.91262	0.527222	2180, 2052, 4257	80	137	6172	1.68942	1	0.997711	99.9923
GOTERM_CC_FAT	GO:0005624~membrane fraction	6	5.82524	0.690868	2180, 6558, 2052, 5577, 2353, 4257	80	449	6172	1.03096	1	0.996851	100
GOTERM_CC_FAT	GO:0005626~insoluble fraction	6	5.82524	0.729396	2180, 6558, 2052, 5577, 2353, 4257	80	470	6172	0.984894	1	0.99751	100
Annotation Cluster 38	Enrichment Score: 0.38435008721480907
Category	Term	Count	%	PValue	Genes	List Total	Pop Hits	Pop Total	Fold Enrichment	Bonferroni	Benjamini	FDR
GOTERM_BP_FAT	GO:0016570~histone modification	3	2.91262	0.293023	10933, 23512, 6880	85	84	6549	2.75168	1	0.877386	99.6855
GOTERM_BP_FAT	GO:0016569~covalent chromatin modification	3	2.91262	0.312057	10933, 23512, 6880	85	88	6549	2.6266	1	0.889391	99.8002
GOTERM_BP_FAT	GO:0016568~chromatin modification	4	3.8835	0.369428	10933, 23512, 54617, 6880	85	169	6549	1.8236	1	0.928048	99.953
GOTERM_BP_FAT	GO:0006325~chromatin organization	4	3.8835	0.521426	10933, 23512, 54617, 6880	85	214	6549	1.44013	1	0.980756	99.9995
GOTERM_BP_FAT	GO:0051276~chromosome organization	4	3.8835	0.679817	10933, 23512, 54617, 6880	85	270	6549	1.14144	1	0.997356	100
Annotation Cluster 39	Enrichment Score: 0.3393332854412208
Category	Term	Count	%	PValue	Genes	List Total	Pop Hits	Pop Total	Fold Enrichment	Bonferroni	Benjamini	FDR
SP_PIR_KEYWORDS	transmembrane protein	9	8.73786	0.0664441	5028, 136, 2052, 2263, 7852, 2690, 290, 4257, 6857	103	357	8445	2.06698	1	0.77732	59.7912
SP_PIR_KEYWORDS	receptor	9	8.73786	0.189629	5028, 118429, 136, 2263, 7852, 2690, 1915, 79602, 1622	103	459	8445	1.60765	1	0.899411	93.8348
SP_PIR_KEYWORDS	cell membrane	12	11.6505	0.323709	5028, 118429, 136, 419, 93377, 2263, 7852, 2690, 290, 8613, 360, 4155	103	769	8445	1.27943	1	0.958154	99.4389
GOTERM_CC_FAT	GO:0005887~integral to plasma membrane	7	6.79612	0.666788	5028, 6558, 136, 419, 7852, 2690, 290	80	521	6172	1.03656	1	0.997762	99.9999
GOTERM_CC_FAT	GO:0031226~intrinsic to plasma membrane	7	6.79612	0.686862	5028, 6558, 136, 419, 7852, 2690, 290	80	532	6172	1.01513	1	0.997071	100
UP_SEQ_FEATURE	topological domain:Cytoplasmic	14	13.5922	0.756876	6558, 136, 9445, 2263, 2690, 290, 8613, 6857, 360, 5028, 2180, 118429, 7852, 79602	103	1244	8439	0.922065	1	1	100
GOTERM_CC_FAT	GO:0005886~plasma membrane	19	18.4466	0.766898	5445, 6558, 136, 123, 2263, 93377, 2690, 290, 8613, 6857, 360, 348, 5028, 2180, 2781, 118429, 419, 7852, 4155	80	1590	6172	0.921918	1	0.998341	100
GOTERM_CC_FAT	GO:0044459~plasma membrane part	11	10.6796	0.885805	5028, 6558, 136, 419, 7852, 2690, 290, 6857, 360, 4155, 348	80	1050	6172	0.808238	1	0.999823	100
UP_SEQ_FEATURE	topological domain:Extracellular	8	7.76699	0.919449	5028, 118429, 136, 2263, 7852, 2690, 79602, 360	103	882	8439	0.743148	1	1	100
Annotation Cluster 40	Enrichment Score: 0.3102072624153911
Category	Term	Count	%	PValue	Genes	List Total	Pop Hits	Pop Total	Fold Enrichment	Bonferroni	Benjamini	FDR
SP_PIR_KEYWORDS	extracellular matrix	4	3.8835	0.242392	55118, 11243, 56999, 7482	103	141	8445	2.32597	1	0.927766	97.4737
GOTERM_CC_FAT	GO:0005578~proteinaceous extracellular matrix	3	2.91262	0.673406	55118, 56999, 7482	80	179	6172	1.29302	1	0.997269	99.9999
GOTERM_CC_FAT	GO:0031012~extracellular matrix	3	2.91262	0.718759	55118, 56999, 7482	80	195	6172	1.18692	1	0.997719	100
Annotation Cluster 41	Enrichment Score: 0.25112061241620853
Category	Term	Count	%	PValue	Genes	List Total	Pop Hits	Pop Total	Fold Enrichment	Bonferroni	Benjamini	FDR
SP_PIR_KEYWORDS	transit peptide	6	5.82524	0.375504	5166, 4200, 30, 5264, 1632, 7385	103	333	8445	1.4773	1	0.975624	99.8048
GOTERM_CC_FAT	GO:0031090~organelle membrane	11	10.6796	0.448148	2180, 5166, 3481, 6319, 23204, 1632, 290, 8613, 4257, 7385, 6857	80	723	6172	1.17379	1	0.998111	99.9456
GOTERM_CC_FAT	GO:0031967~organelle envelope	7	6.79612	0.477638	2180, 2781, 5166, 6319, 1632, 4257, 7385	80	431	6172	1.25302	1	0.998027	99.9728
GOTERM_CC_FAT	GO:0031975~envelope	7	6.79612	0.48221	2180, 2781, 5166, 6319, 1632, 4257, 7385	80	433	6172	1.24723	1	0.997614	99.9757
GOTERM_CC_FAT	GO:0031966~mitochondrial membrane	5	4.85437	0.485006	2180, 5166, 1632, 4257, 7385	80	280	6172	1.37768	1	0.997074	99.9773
GOTERM_CC_FAT	GO:0005740~mitochondrial envelope	5	4.85437	0.53459	2180, 5166, 1632, 4257, 7385	80	298	6172	1.29446	1	0.99686	99.9937
GOTERM_CC_FAT	GO:0005743~mitochondrial inner membrane	4	3.8835	0.539071	5166, 1632, 4257, 7385	80	220	6172	1.40273	1	0.99643	99.9944
GOTERM_CC_FAT	GO:0019866~organelle inner membrane	4	3.8835	0.581452	5166, 1632, 4257, 7385	80	234	6172	1.3188	1	0.997814	99.9984
GOTERM_CC_FAT	GO:0005739~mitochondrion	10	9.70874	0.586667	3985, 2180, 5166, 4200, 7390, 10901, 2690, 1632, 4257, 7385	80	722	6172	1.06856	1	0.997555	99.9986
GOTERM_CC_FAT	GO:0044429~mitochondrial part	6	5.82524	0.634187	2180, 5166, 4200, 1632, 4257, 7385	80	421	6172	1.09952	1	0.998052	99.9997
GOTERM_CC_FAT	GO:0005759~mitochondrial matrix	3	2.91262	0.651806	5166, 4200, 1632	80	172	6172	1.34564	1	0.997561	99.9998
GOTERM_CC_FAT	GO:0031980~mitochondrial lumen	3	2.91262	0.651806	5166, 4200, 1632	80	172	6172	1.34564	1	0.997561	99.9998
UP_SEQ_FEATURE	transit peptide:Mitochondrion	4	3.8835	0.760528	5166, 4200, 1632, 7385	103	326	8439	1.0053	1	1	100
SP_PIR_KEYWORDS	mitochondrion	6	5.82524	0.805476	2180, 5166, 4200, 1632, 4257, 7385	103	552	8445	0.891199	1	0.999569	100
Annotation Cluster 42	Enrichment Score: 0.24740244440429138
Category	Term	Count	%	PValue	Genes	List Total	Pop Hits	Pop Total	Fold Enrichment	Bonferroni	Benjamini	FDR
GOTERM_BP_FAT	GO:0000904~cell morphogenesis involved in differentiation	3	2.91262	0.491763	7852, 4435, 650	85	128	6549	1.80579	1	0.974459	99.9987
GOTERM_BP_FAT	GO:0032989~cellular component morphogenesis	4	3.8835	0.527757	7852, 4435, 91978, 650	85	216	6549	1.4268	1	0.981563	99.9996
GOTERM_BP_FAT	GO:0000902~cell morphogenesis	3	2.91262	0.697594	7852, 4435, 650	85	187	6549	1.23605	1	0.997994	100
Annotation Cluster 43	Enrichment Score: 0.2202737588446698
Category	Term	Count	%	PValue	Genes	List Total	Pop Hits	Pop Total	Fold Enrichment	Bonferroni	Benjamini	FDR
GOTERM_CC_FAT	GO:0044432~endoplasmic reticulum part	4	3.8835	0.539071	3481, 813, 23204, 8613	80	220	6172	1.40273	1	0.99643	99.9944
GOTERM_CC_FAT	GO:0005789~endoplasmic reticulum membrane	3	2.91262	0.612216	3481, 23204, 8613	80	160	6172	1.44656	1	0.998062	99.9994
GOTERM_CC_FAT	GO:0012505~endomembrane system	7	6.79612	0.620405	2781, 3481, 6319, 23204, 290, 8613, 6857	80	497	6172	1.08662	1	0.997957	99.9995
GOTERM_CC_FAT	GO:0042175~nuclear envelope-endoplasmic reticulum network	3	2.91262	0.642214	3481, 23204, 8613	80	169	6172	1.36953	1	0.997963	99.9998
Annotation Cluster 44	Enrichment Score: 0.21366640823590025
Category	Term	Count	%	PValue	Genes	List Total	Pop Hits	Pop Total	Fold Enrichment	Bonferroni	Benjamini	FDR
GOTERM_MF_FAT	GO:0043167~ion binding	28	27.1845	0.345587	55118, 58488, 6558, 23512, 5636, 3985, 6319, 55628, 5264, 132160, 25820, 813, 30827, 4200, 11243, 7763, 2690, 1113, 56999, 290, 6857, 348, 2180, 118429, 84501, 84858, 2512, 7385	81	1931	6200	1.1099	1	0.992738	99.6559
GOTERM_MF_FAT	GO:0043169~cation binding	27	26.2136	0.406946	55118, 58488, 6558, 23512, 5636, 3985, 6319, 55628, 5264, 132160, 25820, 813, 30827, 4200, 11243, 7763, 1113, 56999, 290, 6857, 348, 2180, 118429, 84501, 84858, 2512, 7385	81	1906	6200	1.0843	1	0.995664	99.9078
GOTERM_MF_FAT	GO:0046872~metal ion binding	26	25.2427	0.473955	55118, 6558, 23512, 5636, 3985, 6319, 55628, 5264, 132160, 25820, 813, 30827, 4200, 11243, 7763, 1113, 56999, 290, 6857, 348, 2180, 118429, 84501, 84858, 2512, 7385	81	1883	6200	1.05689	1	0.998085	99.9815
SP_PIR_KEYWORDS	metal-binding	17	16.5049	0.58035	5445, 30827, 4200, 23512, 11243, 7763, 56999, 290, 6857, 3985, 118429, 5264, 55628, 84858, 132160, 25820, 2512	103	1354	8445	1.02942	1	0.995831	99.999
GOTERM_MF_FAT	GO:0046914~transition metal ion binding	15	14.5631	0.755688	30827, 23512, 7763, 56999, 290, 3985, 6319, 84501, 55628, 84858, 5264, 132160, 25820, 2512, 7385	81	1241	6200	0.92518	1	0.999976	100
GOTERM_MF_FAT	GO:0008270~zinc ion binding	11	10.6796	0.815875	3985, 30827, 84501, 23512, 84858, 7763, 55628, 56999, 290, 25820, 7385	81	962	6200	0.875234	1	0.999985	100
SP_PIR_KEYWORDS	zinc	9	8.73786	0.886932	3985, 30827, 23512, 84858, 7763, 55628, 56999, 290, 25820	103	930	8445	0.793454	1	0.999946	100
SP_PIR_KEYWORDS	zinc-finger	6	5.82524	0.923191	30827, 23512, 84858, 7763, 55628, 25820	103	682	8445	0.721322	1	0.999989	100
Annotation Cluster 45	Enrichment Score: 0.20240105913093254
Category	Term	Count	%	PValue	Genes	List Total	Pop Hits	Pop Total	Fold Enrichment	Bonferroni	Benjamini	FDR
SP_PIR_KEYWORDS	cell membrane	12	11.6505	0.323709	5028, 118429, 136, 419, 93377, 2263, 7852, 2690, 290, 8613, 360, 4155	103	769	8445	1.27943	1	0.958154	99.4389
UP_SEQ_FEATURE	glycosylation site:N-linked (GlcNAc...)	22	21.3592	0.365713	5445, 813, 6558, 136, 9445, 93377, 2263, 2690, 56999, 650, 290, 7482, 8613, 6857, 360, 5028, 3512, 118429, 183, 419, 7852, 10468	103	1592	8439	1.13223	1	0.999966	99.8281
SP_PIR_KEYWORDS	membrane	32	31.068	0.654235	23204, 6558, 136, 2052, 389610, 93377, 11010, 8613, 360, 6319, 419, 7852, 79602, 4155, 5445, 27071, 60481, 123, 9445, 2263, 2690, 290, 4257, 6857, 5028, 2180, 2781, 118429, 374882, 7262, 55652, 7385	103	2683	8445	0.977894	1	0.9976	99.9999
UP_SEQ_FEATURE	transmembrane region	23	22.3301	0.669547	23204, 6558, 136, 60481, 2052, 389610, 9445, 93377, 2263, 2690, 11010, 290, 8613, 6857, 360, 5028, 2180, 6319, 118429, 374882, 7852, 55652, 79602	103	1938	8439	0.972362	1	1	100
SP_PIR_KEYWORDS	transmembrane	23	22.3301	0.681406	23204, 6558, 136, 60481, 2052, 389610, 9445, 93377, 2263, 2690, 11010, 290, 8613, 6857, 360, 5028, 2180, 6319, 118429, 374882, 7852, 55652, 79602	103	1951	8445	0.966569	1	0.998064	100
UP_SEQ_FEATURE	topological domain:Cytoplasmic	14	13.5922	0.756876	6558, 136, 9445, 2263, 2690, 290, 8613, 6857, 360, 5028, 2180, 118429, 7852, 79602	103	1244	8439	0.922065	1	1	100
GOTERM_CC_FAT	GO:0005886~plasma membrane	19	18.4466	0.766898	5445, 6558, 136, 123, 2263, 93377, 2690, 290, 8613, 6857, 360, 348, 5028, 2180, 2781, 118429, 419, 7852, 4155	80	1590	6172	0.921918	1	0.998341	100
GOTERM_CC_FAT	GO:0031224~intrinsic to membrane	25	24.2718	0.855316	23204, 6558, 136, 389610, 2052, 93377, 11010, 8613, 360, 6319, 419, 7852, 79602, 60481, 9445, 2263, 2690, 290, 6857, 5028, 2180, 2781, 118429, 374882, 55652	80	2185	6172	0.882723	1	0.999664	100
GOTERM_CC_FAT	GO:0016021~integral to membrane	24	23.301	0.859579	23204, 6558, 136, 60481, 2052, 389610, 9445, 93377, 2263, 2690, 11010, 290, 8613, 6857, 360, 5028, 2180, 6319, 118429, 419, 374882, 7852, 55652, 79602	80	2110	6172	0.877536	1	0.999653	100
Annotation Cluster 46	Enrichment Score: 0.1792695207020058
Category	Term	Count	%	PValue	Genes	List Total	Pop Hits	Pop Total	Fold Enrichment	Bonferroni	Benjamini	FDR
GOTERM_MF_FAT	GO:0008237~metallopeptidase activity	3	2.91262	0.33835	56999, 290, 7385	81	93	6200	2.46914	1	0.993189	99.6013
SP_PIR_KEYWORDS	hydrolase	10	9.70874	0.645176	5222, 5445, 2180, 54617, 2052, 56999, 290, 132160, 8613, 7385	103	804	8445	1.01978	1	0.997534	99.9999
GOTERM_MF_FAT	GO:0004175~endopeptidase activity	3	2.91262	0.680684	5222, 56999, 7385	81	180	6200	1.27572	1	0.99991	100
GOTERM_MF_FAT	GO:0070011~peptidase activity, acting on L-amino acid peptides	4	3.8835	0.686526	5222, 56999, 290, 7385	81	271	6200	1.12979	1	0.999901	100
GOTERM_MF_FAT	GO:0008233~peptidase activity	4	3.8835	0.721542	5222, 56999, 290, 7385	81	286	6200	1.07053	1	0.99995	100
SP_PIR_KEYWORDS	Protease	3	2.91262	0.79901	5222, 56999, 290	103	244	8445	1.00808	1	0.999613	100
GOTERM_BP_FAT	GO:0006508~proteolysis	5	4.85437	0.945479	5222, 56999, 290, 25820, 7385	85	576	6549	0.668811	1	1	100
Annotation Cluster 47	Enrichment Score: 0.1579281157464783
Category	Term	Count	%	PValue	Genes	List Total	Pop Hits	Pop Total	Fold Enrichment	Bonferroni	Benjamini	FDR
GOTERM_BP_FAT	GO:0043933~macromolecular complex subunit organization	7	6.79612	0.531245	183, 2878, 6634, 6880, 6857, 4609, 348	85	454	6549	1.18795	1	0.982022	99.9997
GOTERM_BP_FAT	GO:0065003~macromolecular complex assembly	6	5.82524	0.654371	2878, 6634, 6880, 6857, 4609, 348	85	430	6549	1.07508	1	0.996137	100
GOTERM_BP_FAT	GO:0070271~protein complex biogenesis	4	3.8835	0.819566	2878, 6880, 6857, 4609	85	340	6549	0.906436	1	0.999845	100
GOTERM_BP_FAT	GO:0006461~protein complex assembly	4	3.8835	0.819566	2878, 6880, 6857, 4609	85	340	6549	0.906436	1	0.999845	100
Annotation Cluster 48	Enrichment Score: 0.12993643606161265
Category	Term	Count	%	PValue	Genes	List Total	Pop Hits	Pop Total	Fold Enrichment	Bonferroni	Benjamini	FDR
SMART	SM00355:ZnF_C2H2	3	2.91262	0.652041	23512, 84858, 55628	46	200	4108	1.33957	1	1	99.9965
INTERPRO	IPR007087:Zinc finger, C2H2-type	3	2.91262	0.703242	23512, 84858, 55628	97	196	7752	1.22323	1	1	100
INTERPRO	IPR015880:Zinc finger, C2H2-like	3	2.91262	0.713811	23512, 84858, 55628	97	200	7752	1.19876	1	1	100
SP_PIR_KEYWORDS	zinc-finger	6	5.82524	0.923191	30827, 23512, 84858, 7763, 55628, 25820	103	682	8445	0.721322	1	0.999989	100
Annotation Cluster 49	Enrichment Score: 0.12740784907069752
Category	Term	Count	%	PValue	Genes	List Total	Pop Hits	Pop Total	Fold Enrichment	Bonferroni	Benjamini	FDR
GOTERM_CC_FAT	GO:0031988~membrane-bounded vesicle	6	5.82524	0.529192	813, 11243, 3553, 650, 290, 6857	80	375	6172	1.2344	1	0.997225	99.9927
SP_PIR_KEYWORDS	calcium	5	4.85437	0.644612	5445, 813, 11243, 1113, 6857	103	363	8445	1.12934	1	0.997804	99.9999
GOTERM_CC_FAT	GO:0031982~vesicle	6	5.82524	0.671308	813, 11243, 3553, 650, 290, 6857	80	439	6172	1.05444	1	0.997569	99.9999
GOTERM_MF_FAT	GO:0005509~calcium ion binding	5	4.85437	0.812685	55118, 813, 11243, 1113, 6857	81	428	6200	0.894196	1	0.99999	100
GOTERM_CC_FAT	GO:0016023~cytoplasmic membrane-bounded vesicle	3	2.91262	0.949343	813, 3553, 6857	80	359	6172	0.644708	1	0.999989	100
GOTERM_CC_FAT	GO:0031410~cytoplasmic vesicle	3	2.91262	0.973586	813, 3553, 6857	80	416	6172	0.55637	1	0.999999	100
Annotation Cluster 50	Enrichment Score: 0.07576903700180453
Category	Term	Count	%	PValue	Genes	List Total	Pop Hits	Pop Total	Fold Enrichment	Bonferroni	Benjamini	FDR
SP_PIR_KEYWORDS	kinase	5	4.85437	0.686184	3985, 5166, 5577, 2263, 6880	103	383	8445	1.07037	1	0.997991	100
GOTERM_MF_FAT	GO:0030554~adenyl nucleotide binding	10	9.70874	0.79578	5028, 3985, 2180, 5166, 54617, 9445, 5577, 2263, 7296, 6880	81	858	6200	0.892112	1	0.999992	100
GOTERM_MF_FAT	GO:0001883~purine nucleoside binding	10	9.70874	0.808226	5028, 3985, 2180, 5166, 54617, 9445, 5577, 2263, 7296, 6880	81	869	6200	0.880819	1	0.999993	100
GOTERM_MF_FAT	GO:0017076~purine nucleotide binding	12	11.6505	0.808459	5028, 3985, 2180, 2781, 5166, 54617, 9445, 5577, 2263, 7296, 1915, 6880	81	1040	6200	0.883191	1	0.999991	100
SP_PIR_KEYWORDS	transferase	8	7.76699	0.809451	3985, 5166, 30, 419, 2263, 6817, 4257, 6880	103	747	8445	0.878075	1	0.999555	100
GOTERM_MF_FAT	GO:0001882~nucleoside binding	10	9.70874	0.813699	5028, 3985, 2180, 5166, 54617, 9445, 5577, 2263, 7296, 6880	81	874	6200	0.87578	1	0.999987	100
GOTERM_MF_FAT	GO:0000166~nucleotide binding	14	13.5922	0.83323	5166, 4200, 54617, 5577, 9445, 2263, 4190, 1915, 7296, 6880, 3985, 5028, 2180, 2781	81	1235	6200	0.867696	1	0.999984	100
GOTERM_MF_FAT	GO:0032559~adenyl ribonucleotide binding	9	8.73786	0.833936	5028, 3985, 2180, 5166, 54617, 9445, 5577, 2263, 6880	81	806	6200	0.854701	1	0.99998	100
GOTERM_MF_FAT	GO:0032553~ribonucleotide binding	11	10.6796	0.840472	5028, 3985, 2180, 2781, 5166, 54617, 9445, 5577, 2263, 1915, 6880	81	987	6200	0.853065	1	0.999981	100
GOTERM_MF_FAT	GO:0032555~purine ribonucleotide binding	11	10.6796	0.840472	5028, 3985, 2180, 2781, 5166, 54617, 9445, 5577, 2263, 1915, 6880	81	987	6200	0.853065	1	0.999981	100
UP_SEQ_FEATURE	nucleotide phosphate-binding region:ATP	5	4.85437	0.859035	3985, 5166, 54617, 2263, 6880	103	497	8439	0.824266	1	1	100
UP_SEQ_FEATURE	binding site:ATP	3	2.91262	0.87454	3985, 5166, 2263	103	293	8439	0.838895	1	1	100
SP_PIR_KEYWORDS	nucleotide-binding	9	8.73786	0.884099	3985, 2180, 2781, 5166, 54617, 5577, 2263, 1915, 6880	103	926	8445	0.796882	1	0.999948	100
GOTERM_MF_FAT	GO:0005524~ATP binding	8	7.76699	0.904184	5028, 3985, 2180, 5166, 54617, 9445, 2263, 6880	81	797	6200	0.768313	1	0.999999	100
GOTERM_MF_FAT	GO:0004672~protein kinase activity	3	2.91262	0.935011	3985, 5166, 2263	81	334	6200	0.687514	1	1	100
SP_PIR_KEYWORDS	atp-binding	6	5.82524	0.94691	3985, 2180, 5166, 54617, 2263, 6880	103	729	8445	0.674817	1	0.999997	100
Annotation Cluster 51	Enrichment Score: 0.051893033895896896
Category	Term	Count	%	PValue	Genes	List Total	Pop Hits	Pop Total	Fold Enrichment	Bonferroni	Benjamini	FDR
GOTERM_CC_FAT	GO:0031981~nuclear lumen	12	11.6505	0.645855	1050, 10933, 30827, 3205, 23512, 11243, 6634, 4781, 2353, 6880, 4609, 51747	80	920	6172	1.0063	1	0.997721	99.9998
GOTERM_CC_FAT	GO:0005856~cytoskeleton	5	4.85437	0.985852	28984, 223, 84501, 91978, 4609	80	714	6172	0.540266	1	1	100
GOTERM_CC_FAT	GO:0043228~non-membrane-bounded organelle	12	11.6505	0.986826	28984, 10933, 223, 84501, 23512, 11243, 6634, 91978, 4781, 2353, 2512, 4609	80	1437	6172	0.644259	1	1	100
GOTERM_CC_FAT	GO:0043232~intracellular non-membrane-bounded organelle	12	11.6505	0.986826	28984, 10933, 223, 84501, 23512, 11243, 6634, 91978, 4781, 2353, 2512, 4609	80	1437	6172	0.644259	1	1	100
Annotation Cluster 52	Enrichment Score: 0.017071308435514413
Category	Term	Count	%	PValue	Genes	List Total	Pop Hits	Pop Total	Fold Enrichment	Bonferroni	Benjamini	FDR
GOTERM_CC_FAT	GO:0015630~microtubule cytoskeleton	3	2.91262	0.91399	28984, 91978, 4609	80	311	6172	0.744212	1	0.999931	100
GOTERM_CC_FAT	GO:0005856~cytoskeleton	5	4.85437	0.985852	28984, 223, 84501, 91978, 4609	80	714	6172	0.540266	1	1	100
GOTERM_CC_FAT	GO:0044430~cytoskeletal part	3	2.91262	0.986353	28984, 91978, 4609	80	472	6172	0.49036	1	1	100

## Sheet: Functional cluster 5
Annotation Cluster 1	Enrichment Score: 1.5935857031241638
Category	Term	Count	%	PValue	Genes	List Total	Pop Hits	Pop Total	Fold Enrichment	Bonferroni	Benjamini	FDR
GOTERM_CC_FAT	GO:0005635~nuclear envelope	10	6.25	0.00174775	4928, 10527, 3839, 5742, 4088, 5048, 9961, 89795, 4086, 23345	127	136	6172	3.57341	0.339381	0.129069	2.22818
GOTERM_CC_FAT	GO:0012505~endomembrane system	18	11.25	0.0235472	10527, 6713, 3839, 5742, 5048, 2778, 23345, 6307, 4928, 2222, 90196, 3156, 4088, 11345, 9961, 89795, 4086, 3105	127	497	6172	1.7601	0.996473	0.375385	26.4318
GOTERM_CC_FAT	GO:0031967~organelle envelope	14	8.75	0.0999499	26056, 10527, 3839, 5742, 5048, 11194, 23345, 1593, 4928, 4088, 9961, 7084, 89795, 4086	127	431	6172	1.5786	1	0.552944	74.2443
GOTERM_CC_FAT	GO:0031975~envelope	14	8.75	0.102673	26056, 10527, 3839, 5742, 5048, 11194, 23345, 1593, 4928, 4088, 9961, 7084, 89795, 4086	127	433	6172	1.57131	1	0.551729	75.2303
Annotation Cluster 2	Enrichment Score: 1.5819162904296422
Category	Term	Count	%	PValue	Genes	List Total	Pop Hits	Pop Total	Fold Enrichment	Bonferroni	Benjamini	FDR
SP_PIR_KEYWORDS	cytoskeleton	19	11.875	0.000280685	55920, 6645, 64780, 832, 801, 6711, 5048, 2317, 3691, 23345, 1499, 10540, 80700, 10092, 4082, 8727, 9493, 7094, 51474	160	381	8445	2.63214	0.0719529	0.0719529	0.367569
GOTERM_CC_FAT	GO:0005938~cell cortex	9	5.625	0.000575286	55770, 4082, 832, 2760, 6711, 4628, 5048, 2317, 1499	127	93	6172	4.70307	0.127491	0.127491	0.738543
SP_PIR_KEYWORDS	actin-binding	9	5.625	0.00881735	10092, 6645, 4082, 832, 6711, 4628, 2317, 51474, 23345	160	155	8445	3.06472	0.905184	0.445093	10.9682
GOTERM_CC_FAT	GO:0005856~cytoskeleton	25	15.625	0.00893366	55920, 801, 2317, 5048, 3476, 1809, 1499, 80700, 10540, 5204, 9493, 6645, 832, 64780, 6711, 23345, 9371, 10092, 4082, 8727, 55823, 7094, 4628, 10749, 51474	127	714	6172	1.70163	0.880781	0.262012	10.9167
GOTERM_CC_FAT	GO:0015629~actin cytoskeleton	10	6.25	0.0106389	10092, 4082, 832, 55823, 8727, 6711, 4628, 2317, 51474, 10540	127	179	6172	2.715	0.920732	0.245468	12.8711
GOTERM_MF_FAT	GO:0008092~cytoskeletal protein binding	14	8.75	0.0128064	6645, 26056, 832, 6711, 801, 5048, 2317, 23345, 10092, 4082, 7094, 11345, 4628, 51474	123	331	6200	2.132	0.986323	0.986323	16.0523
GOTERM_CC_FAT	GO:0044430~cytoskeletal part	18	11.25	0.0148931	55920, 6645, 64780, 832, 801, 6711, 5048, 1499, 9371, 80700, 10540, 10092, 4082, 55823, 9493, 4628, 10749, 51474	127	472	6172	1.85333	0.971453	0.276238	17.5759
GOTERM_MF_FAT	GO:0003779~actin binding	10	6.25	0.0198006	10092, 6645, 4082, 832, 6711, 7094, 4628, 2317, 51474, 23345	123	206	6200	2.44692	0.998719	0.891383	23.7765
SP_PIR_KEYWORDS	calmodulin-binding	5	3.125	0.0484231	6645, 4082, 29966, 6711, 4628	160	73	8445	3.61515	0.999998	0.698884	47.8524
GOTERM_BP_FAT	GO:0008064~regulation of actin polymerization or depolymerization	4	2.5	0.04911	10092, 832, 6711, 51474	130	42	6549	4.7978	1	0.984256	56.1186
GOTERM_BP_FAT	GO:0007010~cytoskeleton organization	11	6.875	0.0508447	10092, 64780, 832, 9493, 7094, 4628, 5048, 2317, 51474, 1499, 10540	130	282	6549	1.96506	1	0.982556	57.4099
GOTERM_BP_FAT	GO:0030832~regulation of actin filament length	4	2.5	0.0520586	10092, 832, 6711, 51474	130	43	6549	4.68623	1	0.980112	58.2921
GOTERM_CC_FAT	GO:0015630~microtubule cytoskeleton	12	7.5	0.0520971	55920, 6645, 4082, 801, 9493, 4628, 5048, 10749, 1499, 80700, 10540, 9371	127	311	6172	1.87518	0.999997	0.438069	49.8031
GOTERM_BP_FAT	GO:0030036~actin cytoskeleton organization	7	4.375	0.0849011	10092, 832, 7094, 4628, 5048, 2317, 51474	130	155	6549	2.27509	1	0.986889	76.5718
GOTERM_MF_FAT	GO:0005516~calmodulin binding	5	3.125	0.0887192	6645, 4082, 29966, 6711, 4628	123	86	6200	2.93061	1	0.997945	71.6692
GOTERM_BP_FAT	GO:0030029~actin filament-based process	7	4.375	0.115884	10092, 832, 7094, 4628, 5048, 2317, 51474	130	169	6549	2.08662	1	0.980982	86.6631
GOTERM_CC_FAT	GO:0043228~non-membrane-bounded organelle	31	19.375	0.478806	55920, 801, 64397, 3476, 2317, 5048, 91687, 1809, 10540, 1499, 80700, 4928, 5204, 9493, 134218, 6645, 64780, 832, 152503, 2908, 6711, 23345, 9371, 10092, 4082, 55823, 8727, 7094, 4628, 10749, 51474	127	1437	6172	1.0484	1	0.913826	99.9774
GOTERM_CC_FAT	GO:0043232~intracellular non-membrane-bounded organelle	31	19.375	0.478806	55920, 801, 64397, 3476, 2317, 5048, 91687, 1809, 10540, 1499, 80700, 4928, 5204, 9493, 134218, 6645, 64780, 832, 152503, 2908, 6711, 23345, 9371, 10092, 4082, 55823, 8727, 7094, 4628, 10749, 51474	127	1437	6172	1.0484	1	0.913826	99.9774
Annotation Cluster 3	Enrichment Score: 1.5312285568957573
Category	Term	Count	%	PValue	Genes	List Total	Pop Hits	Pop Total	Fold Enrichment	Bonferroni	Benjamini	FDR
GOTERM_CC_FAT	GO:0030427~site of polarized growth	5	3.125	0.00531388	8874, 4628, 5048, 1809, 10540	127	35	6172	6.94263	0.717125	0.223182	6.63323
GOTERM_CC_FAT	GO:0030426~growth cone	5	3.125	0.00531388	8874, 4628, 5048, 1809, 10540	127	35	6172	6.94263	0.717125	0.223182	6.63323
GOTERM_CC_FAT	GO:0043005~neuron projection	9	5.625	0.044267	29966, 8874, 4628, 5048, 81539, 1809, 23034, 1499, 10540	127	194	6172	2.25457	0.999978	0.415226	44.1915
GOTERM_BP_FAT	GO:0008283~cell proliferation	6	3.75	0.600041	2771, 2782, 4628, 5048, 1499, 10540	130	264	6549	1.14493	1	0.998155	100
Annotation Cluster 4	Enrichment Score: 1.5092977875894134
Category	Term	Count	%	PValue	Genes	List Total	Pop Hits	Pop Total	Fold Enrichment	Bonferroni	Benjamini	FDR
GOTERM_CC_FAT	GO:0000267~cell fraction	21	13.125	0.0262353	10894, 10971, 6645, 10527, 6713, 6017, 5742, 64397, 5048, 81539, 2778, 11194, 1499, 2739, 2771, 2222, 3156, 11345, 51762, 51283, 23034	127	622	6172	1.64078	0.998165	0.342987	28.9985
GOTERM_CC_FAT	GO:0005626~insoluble fraction	17	10.625	0.0288734	10894, 6645, 6713, 5742, 64397, 5048, 81539, 2778, 11194, 1499, 2771, 2222, 3156, 11345, 51762, 51283, 23034	127	470	6172	1.75782	0.999035	0.352077	31.4369
GOTERM_CC_FAT	GO:0005624~membrane fraction	16	10	0.0391492	10894, 6645, 6713, 5742, 64397, 5048, 81539, 2778, 11194, 1499, 2771, 2222, 3156, 11345, 51283, 23034	127	449	6172	1.73179	0.999922	0.408933	40.217
Annotation Cluster 5	Enrichment Score: 1.390043439344638
Category	Term	Count	%	PValue	Genes	List Total	Pop Hits	Pop Total	Fold Enrichment	Bonferroni	Benjamini	FDR
INTERPRO	IPR001715:Calponin-like actin-binding	6	3.75	0.00258951	64780, 8874, 6711, 2317, 89795, 23345	147	51	7752	6.20408	0.619831	0.619831	3.51644
SMART	SM00033:CH	6	3.75	0.00287788	64780, 8874, 6711, 2317, 89795, 23345	81	51	4108	5.96659	0.215015	0.215015	3.04616
UP_SEQ_FEATURE	domain:Actin-binding	3	1.875	0.0311758	6711, 2317, 23345	159	15	8439	10.6151	1	1	37.9524
INTERPRO	IPR001589:Actinin-type, actin-binding, conserved site	3	1.875	0.0398238	6711, 2317, 23345	147	17	7752	9.30612	1	0.999489	42.9396
UP_SEQ_FEATURE	domain:CH 1	3	1.875	0.0483671	6711, 2317, 23345	159	19	8439	8.38034	1	1	52.6244
UP_SEQ_FEATURE	domain:CH 2	3	1.875	0.0483671	6711, 2317, 23345	159	19	8439	8.38034	1	1	52.6244
GOTERM_CC_FAT	GO:0030017~sarcomere	5	3.125	0.0495659	115557, 6711, 2317, 23345, 1499	127	68	6172	3.57341	0.999994	0.436578	48.0487
GOTERM_CC_FAT	GO:0030016~myofibril	5	3.125	0.066476	115557, 6711, 2317, 23345, 1499	127	75	6172	3.2399	1	0.507776	58.7747
GOTERM_CC_FAT	GO:0044449~contractile fiber part	5	3.125	0.0773263	115557, 6711, 2317, 23345, 1499	127	79	6172	3.07585	1	0.53371	64.5384
GOTERM_CC_FAT	GO:0043292~contractile fiber	5	3.125	0.0830657	115557, 6711, 2317, 23345, 1499	127	81	6172	2.9999	1	0.532896	67.2773
UP_SEQ_FEATURE	domain:CH	3	1.875	0.120081	64780, 8874, 89795	159	32	8439	4.97583	1	1	85.4519
UP_TISSUE	Skeletal muscle	8	5	0.379365	9520, 54741, 2273, 27247, 6711, 64397, 2317, 23345	157	314	8283	1.34415	1	0.971704	99.6455
Annotation Cluster 6	Enrichment Score: 1.3542409007628509
Category	Term	Count	%	PValue	Genes	List Total	Pop Hits	Pop Total	Fold Enrichment	Bonferroni	Benjamini	FDR
SP_PIR_KEYWORDS	LIM domain	4	2.5	0.0414507	64780, 2273, 8543, 51474	160	41	8445	5.14939	0.999987	0.713843	42.6116
INTERPRO	IPR001781:Zinc finger, LIM-type	4	2.5	0.0440393	64780, 2273, 8543, 51474	147	42	7752	5.02235	1	0.996301	46.3027
SMART	SM00132:LIM	4	2.5	0.0474138	64780, 2273, 8543, 51474	81	42	4108	4.8301	0.983097	0.869989	40.6307
Annotation Cluster 7	Enrichment Score: 1.137159788808464
Category	Term	Count	%	PValue	Genes	List Total	Pop Hits	Pop Total	Fold Enrichment	Bonferroni	Benjamini	FDR
GOTERM_BP_FAT	GO:0008104~protein localization	22	13.75	0.00400306	64714, 10971, 26056, 55770, 10527, 10267, 3839, 6711, 3339, 5195, 2317, 2778, 1499, 4928, 10640, 55823, 90196, 11345, 7094, 11230, 9961, 51762	130	576	6549	1.92412	0.994961	0.994961	6.3503
SP_PIR_KEYWORDS	protein transport	13	8.125	0.0217135	26056, 10527, 55770, 3839, 5195, 10640, 4928, 55823, 90196, 11230, 11345, 51762, 9961	160	330	8445	2.07926	0.997089	0.622142	25.0215
GOTERM_BP_FAT	GO:0015031~protein transport	17	10.625	0.0369315	10971, 26056, 10527, 55770, 10267, 3839, 6711, 5195, 2778, 10640, 4928, 55823, 90196, 11230, 11345, 9961, 51762	130	502	6549	1.70599	1	0.995974	45.9641
GOTERM_BP_FAT	GO:0045184~establishment of protein localization	17	10.625	0.0405134	10971, 26056, 10527, 55770, 10267, 3839, 6711, 5195, 2778, 10640, 4928, 55823, 90196, 11230, 11345, 9961, 51762	130	508	6549	1.68584	1	0.989388	49.1591
GOTERM_BP_FAT	GO:0046907~intracellular transport	16	10	0.0486655	10971, 10527, 10267, 152503, 3839, 6711, 5195, 5048, 9887, 2778, 9371, 10640, 4928, 11345, 4628, 10749	130	479	6549	1.68274	1	0.987561	55.7819
SP_PIR_KEYWORDS	transport	25	15.625	0.0590841	10894, 10527, 10267, 6017, 1146, 5048, 11194, 79901, 4928, 84925, 11345, 26056, 55770, 3839, 5195, 81539, 115557, 10640, 55823, 90196, 23760, 81855, 11230, 51762, 9961	160	917	8445	1.43897	1	0.6604	55.017
GOTERM_BP_FAT	GO:0006605~protein targeting	6	3.75	0.180001	10971, 4928, 10527, 3839, 6711, 5195	130	152	6549	1.98856	1	0.97363	96.1072
GOTERM_BP_FAT	GO:0034613~cellular protein localization	8	5	0.371996	10971, 4928, 10527, 10267, 3839, 6711, 5195, 1499	130	298	6549	1.3524	1	0.98828	99.9504
GOTERM_BP_FAT	GO:0070727~cellular macromolecule localization	8	5	0.378528	10971, 4928, 10527, 10267, 3839, 6711, 5195, 1499	130	300	6549	1.34338	1	0.987567	99.9582
GOTERM_BP_FAT	GO:0006886~intracellular protein transport	7	4.375	0.448417	10971, 4928, 10527, 10267, 3839, 6711, 5195	130	272	6549	1.29646	1	0.993673	99.9941
Annotation Cluster 8	Enrichment Score: 1.1245402856161089
Category	Term	Count	%	PValue	Genes	List Total	Pop Hits	Pop Total	Fold Enrichment	Bonferroni	Benjamini	FDR
SP_PIR_KEYWORDS	actin-binding	9	5.625	0.00881735	10092, 6645, 4082, 832, 6711, 4628, 2317, 51474, 23345	160	155	8445	3.06472	0.905184	0.445093	10.9682
GOTERM_CC_FAT	GO:0015629~actin cytoskeleton	10	6.25	0.0106389	10092, 4082, 832, 55823, 8727, 6711, 4628, 2317, 51474, 10540	127	179	6172	2.715	0.920732	0.245468	12.8711
GOTERM_MF_FAT	GO:0003779~actin binding	10	6.25	0.0198006	10092, 6645, 4082, 832, 6711, 7094, 4628, 2317, 51474, 23345	123	206	6200	2.44692	0.998719	0.891383	23.7765
GOTERM_BP_FAT	GO:0032535~regulation of cellular component size	9	5.625	0.0283732	64121, 10092, 832, 2273, 84335, 6711, 4088, 1874, 51474	130	184	6549	2.46409	1	0.999496	37.5502
GOTERM_BP_FAT	GO:0032956~regulation of actin cytoskeleton organization	5	3.125	0.0300048	10092, 832, 6711, 4088, 51474	130	60	6549	4.19808	1	0.998765	39.2436
GOTERM_BP_FAT	GO:0032970~regulation of actin filament-based process	5	3.125	0.0333186	10092, 832, 6711, 4088, 51474	130	62	6549	4.06266	1	0.998314	42.5511
GOTERM_BP_FAT	GO:0051493~regulation of cytoskeleton organization	6	3.75	0.0374446	10092, 832, 6711, 4088, 51474, 1499	130	94	6549	3.21555	1	0.993486	46.433
GOTERM_BP_FAT	GO:0030835~negative regulation of actin filament depolymerization	3	1.875	0.0385793	832, 6711, 51474	130	16	6549	9.44567	1	0.991064	47.4567
GOTERM_BP_FAT	GO:0030834~regulation of actin filament depolymerization	3	1.875	0.047953	832, 6711, 51474	130	18	6549	8.39615	1	0.990243	55.2371
GOTERM_BP_FAT	GO:0008064~regulation of actin polymerization or depolymerization	4	2.5	0.04911	10092, 832, 6711, 51474	130	42	6549	4.7978	1	0.984256	56.1186
GOTERM_BP_FAT	GO:0030832~regulation of actin filament length	4	2.5	0.0520586	10092, 832, 6711, 51474	130	43	6549	4.68623	1	0.980112	58.2921
GOTERM_BP_FAT	GO:0043242~negative regulation of protein complex disassembly	3	1.875	0.110799	832, 6711, 51474	130	29	6549	5.21141	1	0.981157	85.3514
GOTERM_BP_FAT	GO:0043244~regulation of protein complex disassembly	3	1.875	0.143887	832, 6711, 51474	130	34	6549	4.44502	1	0.977509	92.122
GOTERM_BP_FAT	GO:0033043~regulation of organelle organization	6	3.75	0.157252	10092, 832, 6711, 4088, 51474, 1499	130	145	6549	2.08456	1	0.973741	93.9095
GOTERM_BP_FAT	GO:0030833~regulation of actin filament polymerization	3	1.875	0.164618	10092, 832, 6711	130	37	6549	4.08462	1	0.972528	94.7242
GOTERM_BP_FAT	GO:0051494~negative regulation of cytoskeleton organization	3	1.875	0.185835	832, 6711, 51474	130	40	6549	3.77827	1	0.973101	96.5363
GOTERM_BP_FAT	GO:0032271~regulation of protein polymerization	3	1.875	0.229241	10092, 832, 6711	130	46	6549	3.28545	1	0.981565	98.5863
GOTERM_BP_FAT	GO:0044087~regulation of cellular component biogenesis	4	2.5	0.282482	10092, 832, 6711, 4088	130	94	6549	2.1437	1	0.985155	99.5616
GOTERM_BP_FAT	GO:0010639~negative regulation of organelle organization	3	1.875	0.302591	832, 6711, 51474	130	56	6549	2.69876	1	0.983972	99.7246
GOTERM_BP_FAT	GO:0043254~regulation of protein complex assembly	3	1.875	0.32447	10092, 832, 6711	130	59	6549	2.56154	1	0.986101	99.8365
GOTERM_BP_FAT	GO:0051129~negative regulation of cellular component organization	3	1.875	0.53292	832, 6711, 51474	130	90	6549	1.67923	1	0.996671	99.9996
Annotation Cluster 9	Enrichment Score: 1.0863124185111517
Category	Term	Count	%	PValue	Genes	List Total	Pop Hits	Pop Total	Fold Enrichment	Bonferroni	Benjamini	FDR
SP_PIR_KEYWORDS	microtubule	7	4.375	0.0274237	55920, 6645, 9493, 5048, 10749, 10540, 9371	160	122	8445	3.02843	0.999387	0.6033	30.5637
GOTERM_CC_FAT	GO:0005874~microtubule	8	5	0.0312238	55920, 6645, 801, 9493, 5048, 10749, 10540, 9371	127	148	6172	2.62694	0.999457	0.357403	33.5441
UP_SEQ_FEATURE	domain:Kinesin-motor	3	1.875	0.0483671	9493, 10749, 9371	159	19	8439	8.38034	1	1	52.6244
INTERPRO	IPR001752:Kinesin, motor region	3	1.875	0.0488683	9493, 10749, 9371	147	19	7752	8.32653	1	0.990647	49.9289
INTERPRO	IPR019821:Kinesin, motor region, conserved site	3	1.875	0.0488683	9493, 10749, 9371	147	19	7752	8.32653	1	0.990647	49.9289
SMART	SM00129:KISc	3	1.875	0.0517079	9493, 10749, 9371	81	19	4108	8.0078	0.988435	0.773859	43.4412
GOTERM_MF_FAT	GO:0003774~motor activity	5	3.125	0.0596486	9493, 4628, 10749, 10540, 9371	123	75	6200	3.36043	1	0.994024	56.6089
GOTERM_BP_FAT	GO:0007018~microtubule-based movement	4	2.5	0.0749858	9493, 5048, 10749, 9371	130	50	6549	4.03015	1	0.98621	72.0556
SP_PIR_KEYWORDS	motor protein	4	2.5	0.127585	9493, 4628, 10749, 9371	160	66	8445	3.19886	1	0.752513	83.3112
GOTERM_CC_FAT	GO:0005875~microtubule associated complex	4	2.5	0.137138	9493, 5048, 10540, 9371	127	63	6172	3.08561	1	0.611242	85.0441
GOTERM_MF_FAT	GO:0003777~microtubule motor activity	3	1.875	0.150471	9493, 10749, 9371	123	35	6200	4.32056	1	0.979325	89.0716
GOTERM_BP_FAT	GO:0007017~microtubule-based process	6	3.75	0.150985	9493, 5048, 10749, 1499, 10540, 9371	130	143	6549	2.11372	1	0.975821	93.1249
UP_SEQ_FEATURE	nucleotide phosphate-binding region:ATP	8	5	0.830311	11329, 9493, 4628, 7317, 10749, 9060, 11194, 9371	159	497	8439	0.854334	1	1	100
Annotation Cluster 10	Enrichment Score: 1.0758904550718396
Category	Term	Count	%	PValue	Genes	List Total	Pop Hits	Pop Total	Fold Enrichment	Bonferroni	Benjamini	FDR
GOTERM_CC_FAT	GO:0019897~extrinsic to plasma membrane	4	2.5	0.012294	2782, 55970, 2778, 1499	127	24	6172	8.09974	0.946695	0.254107	14.7302
GOTERM_CC_FAT	GO:0005834~heterotrimeric G-protein complex	3	1.875	0.0238718	2782, 55970, 2778	127	12	6172	12.1496	0.996741	0.335697	26.7462
GOTERM_BP_FAT	GO:0009719~response to endogenous stimulus	10	6.25	0.110397	3351, 29966, 2782, 5742, 64397, 55970, 6347, 2778, 4086, 1499	130	286	6549	1.76143	1	0.984551	85.2427
GOTERM_BP_FAT	GO:0009755~hormone-mediated signaling	3	1.875	0.123781	2782, 55970, 2778	130	31	6549	4.87519	1	0.977381	88.4835
GOTERM_BP_FAT	GO:0009725~response to hormone stimulus	9	5.625	0.146606	3351, 29966, 2782, 5742, 64397, 55970, 6347, 2778, 1499	130	263	6549	1.72393	1	0.977672	92.5213
SP_PIR_KEYWORDS	transducer	6	3.75	0.177188	3351, 2771, 81669, 2782, 55970, 2778	160	158	8445	2.00435	1	0.812404	92.2564
GOTERM_BP_FAT	GO:0032870~cellular response to hormone stimulus	4	2.5	0.282482	2782, 64397, 55970, 2778	130	94	6549	2.1437	1	0.985155	99.5616
Annotation Cluster 11	Enrichment Score: 0.897167817792431
Category	Term	Count	%	PValue	Genes	List Total	Pop Hits	Pop Total	Fold Enrichment	Bonferroni	Benjamini	FDR
GOTERM_CC_FAT	GO:0019898~extrinsic to membrane	12	7.5	0.0237278	26056, 6645, 51479, 29966, 2782, 8727, 5742, 55970, 2778, 79109, 1499, 10540	127	274	6172	2.1284	0.996625	0.354539	26.6069
GOTERM_BP_FAT	GO:0009719~response to endogenous stimulus	10	6.25	0.110397	3351, 29966, 2782, 5742, 64397, 55970, 6347, 2778, 4086, 1499	130	286	6549	1.76143	1	0.984551	85.2427
GOTERM_BP_FAT	GO:0009725~response to hormone stimulus	9	5.625	0.146606	3351, 29966, 2782, 5742, 64397, 55970, 6347, 2778, 1499	130	263	6549	1.72393	1	0.977672	92.5213
GOTERM_BP_FAT	GO:0010033~response to organic substance	13	8.125	0.281769	29966, 6713, 5742, 2908, 64397, 6347, 2778, 1499, 3351, 2782, 55970, 4088, 4086	130	501	6549	1.30719	1	0.985567	99.5544
GOTERM_BP_FAT	GO:0048545~response to steroid hormone stimulus	5	3.125	0.301926	3351, 29966, 5742, 6347, 1499	130	141	6549	1.78642	1	0.984372	99.7203
Annotation Cluster 12	Enrichment Score: 0.8728130771538626
Category	Term	Count	%	PValue	Genes	List Total	Pop Hits	Pop Total	Fold Enrichment	Bonferroni	Benjamini	FDR
GOTERM_CC_FAT	GO:0015630~microtubule cytoskeleton	12	7.5	0.0520971	55920, 6645, 4082, 801, 9493, 4628, 5048, 10749, 1499, 80700, 10540, 9371	127	311	6172	1.87518	0.999997	0.438069	49.8031
GOTERM_CC_FAT	GO:0005813~centrosome	6	3.75	0.120279	4082, 801, 5048, 1499, 80700, 10540	127	128	6172	2.27805	1	0.590692	80.8106
GOTERM_CC_FAT	GO:0005815~microtubule organizing center	6	3.75	0.160731	4082, 801, 5048, 1499, 80700, 10540	127	141	6172	2.06802	1	0.65521	89.5356
GOTERM_BP_FAT	GO:0000226~microtubule cytoskeleton organization	4	2.5	0.320365	9493, 5048, 1499, 10540	130	101	6549	1.99513	1	0.986166	99.8195
Annotation Cluster 13	Enrichment Score: 0.8405340018947055
Category	Term	Count	%	PValue	Genes	List Total	Pop Hits	Pop Total	Fold Enrichment	Bonferroni	Benjamini	FDR
GOTERM_BP_FAT	GO:0045667~regulation of osteoblast differentiation	4	2.5	0.0139449	4088, 2778, 4086, 1499	130	26	6549	7.7503	1	0.999905	20.5229
GOTERM_BP_FAT	GO:0048598~embryonic morphogenesis	8	5	0.0201959	3340, 8543, 57534, 4088, 3339, 2778, 4086, 1499	130	140	6549	2.87868	1	0.998803	28.3748
GOTERM_BP_FAT	GO:0045669~positive regulation of osteoblast differentiation	3	1.875	0.0385793	2778, 4086, 1499	130	16	6549	9.44567	1	0.991064	47.4567
GOTERM_BP_FAT	GO:0001704~formation of primary germ layer	3	1.875	0.0529188	4088, 4086, 1499	130	19	6549	7.95425	1	0.97705	58.9069
GOTERM_BP_FAT	GO:0030278~regulation of ossification	4	2.5	0.0550912	4088, 2778, 4086, 1499	130	44	6549	4.57972	1	0.976179	60.4218
GOTERM_MF_FAT	GO:0046332~SMAD binding	3	1.875	0.0919043	4088, 4086, 1499	123	26	6200	5.81614	1	0.995254	72.9844
GOTERM_BP_FAT	GO:0001501~skeletal system development	7	4.375	0.0975467	3340, 4088, 3339, 9060, 2778, 4086, 1499	130	161	6549	2.1903	1	0.987312	81.341
GOTERM_CC_FAT	GO:0005667~transcription factor complex	6	3.75	0.103465	8543, 4088, 1874, 4086, 6925, 1499	127	122	6172	2.39009	1	0.5436	75.5104
GOTERM_BP_FAT	GO:0048729~tissue morphogenesis	5	3.125	0.110571	8543, 57534, 4088, 4086, 1499	130	93	6549	2.70844	1	0.982875	85.2898
GOTERM_BP_FAT	GO:0045597~positive regulation of cell differentiation	6	3.75	0.150985	941, 4088, 2778, 5364, 4086, 1499	130	143	6549	2.11372	1	0.975821	93.1249
GOTERM_BP_FAT	GO:0007369~gastrulation	3	1.875	0.157647	4088, 4086, 1499	130	36	6549	4.19808	1	0.972451	93.9561
GOTERM_BP_FAT	GO:0001503~ossification	4	2.5	0.173543	4088, 3339, 2778, 4086	130	73	6549	2.76038	1	0.973843	95.5742
GOTERM_BP_FAT	GO:0060348~bone development	4	2.5	0.193371	4088, 3339, 2778, 4086	130	77	6549	2.61698	1	0.973586	97.0251
GOTERM_BP_FAT	GO:0045944~positive regulation of transcription from RNA polymerase II promoter	7	4.375	0.195129	29966, 253461, 4088, 10725, 6827, 4086, 1499	130	198	6549	1.781	1	0.972096	97.1294
GOTERM_BP_FAT	GO:0051094~positive regulation of developmental process	6	3.75	0.258323	941, 4088, 2778, 5364, 4086, 1499	130	174	6549	1.73714	1	0.983526	99.2464
GOTERM_MF_FAT	GO:0019900~kinase binding	4	2.5	0.379312	4082, 4088, 4086, 1499	123	112	6200	1.80023	1	0.995816	99.8458
GOTERM_BP_FAT	GO:0045596~negative regulation of cell differentiation	3	1.875	0.63759	57534, 4088, 1499	130	109	6549	1.38652	1	0.998542	100
GOTERM_MF_FAT	GO:0016563~transcription activator activity	5	3.125	0.726091	941, 4088, 23326, 4086, 1499	123	248	6200	1.01626	1	0.999896	100
GOTERM_BP_FAT	GO:0042127~regulation of cell proliferation	9	5.625	0.741109	2771, 941, 5742, 4088, 6347, 1874, 4086, 1499, 5328	130	481	6549	0.942604	1	0.999524	100
GOTERM_MF_FAT	GO:0042802~identical protein binding	6	3.75	0.908433	51421, 3156, 4088, 5048, 2778, 4086	123	405	6200	0.746763	1	0.999995	100
Annotation Cluster 14	Enrichment Score: 0.810623133398472
Category	Term	Count	%	PValue	Genes	List Total	Pop Hits	Pop Total	Fold Enrichment	Bonferroni	Benjamini	FDR
GOTERM_BP_FAT	GO:0048598~embryonic morphogenesis	8	5	0.0201959	3340, 8543, 57534, 4088, 3339, 2778, 4086, 1499	130	140	6549	2.87868	1	0.998803	28.3748
GOTERM_BP_FAT	GO:0048704~embryonic skeletal system morphogenesis	3	1.875	0.0529188	3340, 3339, 2778	130	19	6549	7.95425	1	0.97705	58.9069
GOTERM_BP_FAT	GO:0048706~embryonic skeletal system development	3	1.875	0.0920827	3340, 3339, 2778	130	26	6549	5.81272	1	0.987645	79.4046
GOTERM_BP_FAT	GO:0001501~skeletal system development	7	4.375	0.0975467	3340, 4088, 3339, 9060, 2778, 4086, 1499	130	161	6549	2.1903	1	0.987312	81.341
GOTERM_BP_FAT	GO:0043009~chordate embryonic development	7	4.375	0.128173	3340, 8543, 57534, 3339, 4628, 2778, 7082	130	174	6549	2.02666	1	0.978706	89.3921
GOTERM_BP_FAT	GO:0009792~embryonic development ending in birth or egg hatching	7	4.375	0.130704	3340, 8543, 57534, 3339, 4628, 2778, 7082	130	175	6549	2.01508	1	0.975155	89.8849
GOTERM_BP_FAT	GO:0048562~embryonic organ morphogenesis	3	1.875	0.236555	3340, 3339, 2778	130	47	6549	3.21555	1	0.980855	98.7905
GOTERM_BP_FAT	GO:0048705~skeletal system morphogenesis	3	1.875	0.251218	3340, 3339, 2778	130	49	6549	3.0843	1	0.98348	99.1193
GOTERM_BP_FAT	GO:0048568~embryonic organ development	3	1.875	0.388858	3340, 3339, 2778	130	68	6549	2.22251	1	0.987582	99.9682
GOTERM_BP_FAT	GO:0007507~heart development	4	2.5	0.519302	57534, 3339, 4628, 1499	130	139	6549	1.4497	1	0.996246	99.9994
GOTERM_BP_FAT	GO:0001701~in utero embryonic development	3	1.875	0.627486	57534, 4628, 7082	130	107	6549	1.41244	1	0.998416	100
Annotation Cluster 15	Enrichment Score: 0.7696159783286629
Category	Term	Count	%	PValue	Genes	List Total	Pop Hits	Pop Total	Fold Enrichment	Bonferroni	Benjamini	FDR
GOTERM_BP_FAT	GO:0032507~maintenance of protein location in cell	3	1.875	0.130405	64714, 7094, 2317	130	32	6549	4.72284	1	0.976745	89.8277
GOTERM_BP_FAT	GO:0045185~maintenance of protein location	3	1.875	0.157647	64714, 7094, 2317	130	36	6549	4.19808	1	0.972451	93.9561
GOTERM_BP_FAT	GO:0051651~maintenance of location in cell	3	1.875	0.171643	64714, 7094, 2317	130	38	6549	3.97713	1	0.974078	95.4048
GOTERM_BP_FAT	GO:0051235~maintenance of location	3	1.875	0.236555	64714, 7094, 2317	130	47	6549	3.21555	1	0.980855	98.7905
Annotation Cluster 16	Enrichment Score: 0.7449505705132965
Category	Term	Count	%	PValue	Genes	List Total	Pop Hits	Pop Total	Fold Enrichment	Bonferroni	Benjamini	FDR
GOTERM_BP_FAT	GO:0006928~cell motion	12	7.5	0.0174948	10894, 10092, 81669, 832, 8874, 3156, 7094, 4628, 5048, 6347, 5364, 5328	130	271	6549	2.23071	1	0.999574	25.0758
GOTERM_BP_FAT	GO:0016477~cell migration	7	4.375	0.108814	8874, 3156, 4628, 5048, 6347, 5364, 5328	130	166	6549	2.12433	1	0.985314	84.807
GOTERM_BP_FAT	GO:0051674~localization of cell	7	4.375	0.123183	8874, 3156, 4628, 5048, 6347, 5364, 5328	130	172	6549	2.05022	1	0.978787	88.3542
GOTERM_BP_FAT	GO:0048870~cell motility	7	4.375	0.123183	8874, 3156, 4628, 5048, 6347, 5364, 5328	130	172	6549	2.05022	1	0.978787	88.3542
GOTERM_BP_FAT	GO:0007610~behavior	7	4.375	0.279328	3351, 81669, 2760, 3156, 5048, 6347, 5328	130	224	6549	1.57428	1	0.986709	99.529
GOTERM_CC_FAT	GO:0043025~cell soma	4	2.5	0.317815	29966, 4628, 5048, 6347	127	97	6172	2.00406	1	0.836809	99.275
GOTERM_BP_FAT	GO:0006935~chemotaxis	3	1.875	0.416636	81669, 6347, 5328	130	72	6549	2.09904	1	0.991254	99.9852
GOTERM_BP_FAT	GO:0042330~taxis	3	1.875	0.416636	81669, 6347, 5328	130	72	6549	2.09904	1	0.991254	99.9852
GOTERM_BP_FAT	GO:0007626~locomotory behavior	4	2.5	0.443555	81669, 5048, 6347, 5328	130	124	6549	1.62506	1	0.993613	99.9931
Annotation Cluster 17	Enrichment Score: 0.7249928500173756
Category	Term	Count	%	PValue	Genes	List Total	Pop Hits	Pop Total	Fold Enrichment	Bonferroni	Benjamini	FDR
GOTERM_BP_FAT	GO:0048598~embryonic morphogenesis	8	5	0.0201959	3340, 8543, 57534, 4088, 3339, 2778, 4086, 1499	130	140	6549	2.87868	1	0.998803	28.3748
GOTERM_BP_FAT	GO:0048729~tissue morphogenesis	5	3.125	0.110571	8543, 57534, 4088, 4086, 1499	130	93	6549	2.70844	1	0.982875	85.2898
GOTERM_BP_FAT	GO:0016331~morphogenesis of embryonic epithelium	3	1.875	0.130405	8543, 57534, 1499	130	32	6549	4.72284	1	0.976745	89.8277
GOTERM_BP_FAT	GO:0002009~morphogenesis of an epithelium	3	1.875	0.265907	8543, 57534, 1499	130	51	6549	2.96335	1	0.9844	99.363
GOTERM_BP_FAT	GO:0060429~epithelium development	4	2.5	0.379907	8543, 57534, 1874, 1499	130	112	6549	1.79918	1	0.987441	99.9597
GOTERM_BP_FAT	GO:0035239~tube morphogenesis	3	1.875	0.409748	8543, 57534, 1499	130	71	6549	2.1286	1	0.9906	99.982
GOTERM_BP_FAT	GO:0035295~tube development	3	1.875	0.698112	8543, 57534, 1499	130	122	6549	1.23878	1	0.999188	100
Annotation Cluster 18	Enrichment Score: 0.7179323507727334
Category	Term	Count	%	PValue	Genes	List Total	Pop Hits	Pop Total	Fold Enrichment	Bonferroni	Benjamini	FDR
GOTERM_CC_FAT	GO:0005643~nuclear pore	4	2.5	0.093286	4928, 10527, 3839, 9961	127	53	6172	3.66781	1	0.55081	71.6768
GOTERM_BP_FAT	GO:0017038~protein import	5	3.125	0.117114	4928, 10527, 3839, 6711, 5195	130	95	6549	2.65142	1	0.979994	86.9632
GOTERM_BP_FAT	GO:0006606~protein import into nucleus	4	2.5	0.122596	4928, 10527, 3839, 6711	130	62	6549	3.25012	1	0.980172	88.2259
GOTERM_BP_FAT	GO:0051170~nuclear import	4	2.5	0.131406	4928, 10527, 3839, 6711	130	64	6549	3.14856	1	0.97384	90.0175
GOTERM_CC_FAT	GO:0046930~pore complex	4	2.5	0.137138	4928, 10527, 3839, 9961	127	63	6172	3.08561	1	0.611242	85.0441
GOTERM_BP_FAT	GO:0034504~protein localization in nucleus	4	2.5	0.154349	4928, 10527, 3839, 6711	130	69	6549	2.9204	1	0.976434	93.5572
GOTERM_BP_FAT	GO:0006913~nucleocytoplasmic transport	5	3.125	0.171105	4928, 10527, 3839, 6711, 9887	130	110	6549	2.28986	1	0.975138	95.3559
GOTERM_BP_FAT	GO:0051169~nuclear transport	5	3.125	0.178886	4928, 10527, 3839, 6711, 9887	130	112	6549	2.24897	1	0.974306	96.0197
GOTERM_BP_FAT	GO:0006605~protein targeting	6	3.75	0.180001	10971, 4928, 10527, 3839, 6711, 5195	130	152	6549	1.98856	1	0.97363	96.1072
GOTERM_BP_FAT	GO:0033365~protein localization in organelle	4	2.5	0.358322	4928, 10527, 3839, 6711	130	108	6549	1.86581	1	0.988908	99.9295
GOTERM_BP_FAT	GO:0034613~cellular protein localization	8	5	0.371996	10971, 4928, 10527, 10267, 3839, 6711, 5195, 1499	130	298	6549	1.3524	1	0.98828	99.9504
GOTERM_BP_FAT	GO:0070727~cellular macromolecule localization	8	5	0.378528	10971, 4928, 10527, 10267, 3839, 6711, 5195, 1499	130	300	6549	1.34338	1	0.987567	99.9582
GOTERM_BP_FAT	GO:0006886~intracellular protein transport	7	4.375	0.448417	10971, 4928, 10527, 10267, 3839, 6711, 5195	130	272	6549	1.29646	1	0.993673	99.9941
Annotation Cluster 19	Enrichment Score: 0.7161751752601095
Category	Term	Count	%	PValue	Genes	List Total	Pop Hits	Pop Total	Fold Enrichment	Bonferroni	Benjamini	FDR
GOTERM_BP_FAT	GO:0016126~sterol biosynthetic process	4	2.5	0.0139449	6307, 2222, 6713, 3156	130	26	6549	7.7503	1	0.999905	20.5229
KEGG_PATHWAY	hsa00100:Steroid biosynthesis	3	1.875	0.0206426	6307, 2222, 6713	59	11	2795	12.9199	0.859242	0.859242	20.4526
GOTERM_BP_FAT	GO:0016125~sterol metabolic process	5	3.125	0.0350527	1593, 6307, 2222, 6713, 3156	130	63	6549	3.99817	1	0.997214	44.2137
SP_PIR_KEYWORDS	sterol biosynthesis	3	1.875	0.0536289	6307, 2222, 3156	160	20	8445	7.91719	1	0.649113	51.4732
GOTERM_BP_FAT	GO:0008202~steroid metabolic process	6	3.75	0.0948243	1593, 6307, 2222, 6713, 2908, 3156	130	123	6549	2.45741	1	0.987478	80.3987
SP_PIR_KEYWORDS	Steroid biosynthesis	3	1.875	0.0968786	6307, 2222, 3156	160	28	8445	5.65513	1	0.724925	73.7281
GOTERM_BP_FAT	GO:0006694~steroid biosynthetic process	4	2.5	0.0975914	6307, 2222, 6713, 3156	130	56	6549	3.59835	1	0.985486	81.3561
GOTERM_BP_FAT	GO:0008203~cholesterol metabolic process	4	2.5	0.101601	1593, 2222, 6713, 3156	130	57	6549	3.53522	1	0.984337	82.6658
SP_PIR_KEYWORDS	lipid synthesis	4	2.5	0.119258	6307, 2222, 5742, 3156	160	64	8445	3.29883	1	0.741066	81.0965
GOTERM_CC_FAT	GO:0042598~vesicular fraction	5	3.125	0.306303	2222, 6713, 5742, 3156, 5048	127	137	6172	1.77367	1	0.835647	99.1005
GOTERM_BP_FAT	GO:0008610~lipid biosynthetic process	6	3.75	0.36291	6307, 2222, 57140, 6713, 5742, 3156	130	201	6549	1.50379	1	0.988178	99.9373
GOTERM_BP_FAT	GO:0055114~oxidation reduction	10	6.25	0.36405	3712, 1593, 6307, 64780, 2222, 6713, 5742, 3156, 158471, 79901	130	391	6549	1.28841	1	0.987995	99.9391
GOTERM_CC_FAT	GO:0042175~nuclear envelope-endoplasmic reticulum network	5	3.125	0.454875	6307, 2222, 6713, 3156, 89795	127	169	6172	1.43782	1	0.901659	99.9597
SP_PIR_KEYWORDS	oxidoreductase	8	5	0.462827	3712, 1593, 6307, 2222, 6713, 5742, 3156, 79901	160	341	8445	1.23827	1	0.947755	99.9712
GOTERM_CC_FAT	GO:0005792~microsome	4	2.5	0.513751	2222, 6713, 5742, 3156	127	133	6172	1.46161	1	0.927849	99.9907
SP_PIR_KEYWORDS	nadp	3	1.875	0.53733	1593, 2222, 3156	160	95	8445	1.66678	1	0.959376	99.9959
GOTERM_CC_FAT	GO:0005789~endoplasmic reticulum membrane	4	2.5	0.639794	6307, 2222, 6713, 3156	127	160	6172	1.21496	1	0.968478	99.9998
GOTERM_CC_FAT	GO:0044432~endoplasmic reticulum part	5	3.125	0.663389	64714, 6307, 2222, 6713, 3156	127	220	6172	1.10451	1	0.972237	99.9999
SP_PIR_KEYWORDS	endoplasmic reticulum	7	4.375	0.841561	64714, 6307, 2222, 6713, 5742, 3156, 51283	160	439	8445	0.841614	1	0.996186	100
GOTERM_CC_FAT	GO:0005783~endoplasmic reticulum	8	5	0.961481	64714, 6307, 2222, 6713, 5742, 3156, 51283, 10749	127	585	6172	0.664594	1	0.999811	100
Annotation Cluster 20	Enrichment Score: 0.7056851963480083
Category	Term	Count	%	PValue	Genes	List Total	Pop Hits	Pop Total	Fold Enrichment	Bonferroni	Benjamini	FDR
INTERPRO	IPR001849:Pleckstrin homology	6	3.75	0.140912	115557, 6645, 8874, 6711, 23075, 23207	147	146	7752	2.16718	1	0.999921	87.7167
SMART	SM00233:PH	6	3.75	0.153881	115557, 6645, 8874, 6711, 23075, 23207	81	146	4108	2.08422	0.999999	0.970073	83.3635
UP_SEQ_FEATURE	domain:PH	5	3.125	0.194963	115557, 8874, 6711, 23075, 23207	159	122	8439	2.17522	1	1	96.1917
INTERPRO	IPR011993:Pleckstrin homology-type	5	3.125	0.355775	115557, 6711, 7094, 23075, 23207	147	160	7752	1.64796	1	0.999999	99.769
Annotation Cluster 21	Enrichment Score: 0.6793797779871126
Category	Term	Count	%	PValue	Genes	List Total	Pop Hits	Pop Total	Fold Enrichment	Bonferroni	Benjamini	FDR
INTERPRO	IPR018957:Zinc finger, C3HC4 RING-type	5	3.125	0.125869	55823, 151636, 57534, 57674, 51283	147	102	7752	2.58503	1	0.999956	84.3903
INTERPRO	IPR017907:Zinc finger, RING-type, conserved site	5	3.125	0.205429	55823, 151636, 57534, 57674, 51283	147	124	7752	2.1264	1	0.999995	95.8196
INTERPRO	IPR001841:Zinc finger, RING-type	5	3.125	0.241485	55823, 151636, 57534, 57674, 51283	147	133	7752	1.98251	1	0.999989	97.7982
UP_SEQ_FEATURE	zinc finger region:RING-type	4	2.5	0.247577	55823, 151636, 57674, 51283	159	92	8439	2.30763	1	1	98.6247
SMART	SM00184:RING	5	3.125	0.25937	55823, 151636, 57534, 57674, 51283	81	133	4108	1.90662	1	0.993554	96.016
Annotation Cluster 22	Enrichment Score: 0.673484196992027
Category	Term	Count	%	PValue	Genes	List Total	Pop Hits	Pop Total	Fold Enrichment	Bonferroni	Benjamini	FDR
SP_PIR_KEYWORDS	signal transduction	3	1.875	0.0488561	2771, 2782, 2778	160	19	8445	8.33388	0.999998	0.670548	48.1628
SP_PIR_KEYWORDS	heterotrimer	3	1.875	0.0636398	2771, 2782, 2778	160	22	8445	7.19744	1	0.66485	57.7917
GOTERM_MF_FAT	GO:0003924~GTPase activity	6	3.75	0.11258	64121, 2771, 2782, 5899, 51762, 2778	123	130	6200	2.32645	1	0.987956	80.2381
SP_PIR_KEYWORDS	transducer	6	3.75	0.177188	3351, 2771, 81669, 2782, 55970, 2778	160	158	8445	2.00435	1	0.812404	92.2564
SP_PIR_KEYWORDS	GTP binding	3	1.875	0.207571	2771, 2782, 2778	160	45	8445	3.51875	1	0.829353	95.2729
GOTERM_BP_FAT	GO:0019932~second-messenger-mediated signaling	5	3.125	0.284155	3351, 2771, 2782, 6347, 2778	130	137	6549	1.83857	1	0.984995	99.578
GOTERM_BP_FAT	GO:0051345~positive regulation of hydrolase activity	4	2.5	0.293276	2782, 2760, 4088, 11345	130	96	6549	2.09904	1	0.983832	99.6579
GOTERM_BP_FAT	GO:0051336~regulation of hydrolase activity	5	3.125	0.497369	2782, 2760, 4088, 11345, 5048	130	185	6549	1.36154	1	0.995487	99.9987
GOTERM_BP_FAT	GO:0044093~positive regulation of molecular function	8	5	0.569894	9491, 2771, 2782, 801, 2760, 4088, 11345, 2778	130	360	6549	1.11949	1	0.997479	99.9999
GOTERM_BP_FAT	GO:0043085~positive regulation of catalytic activity	7	4.375	0.605545	9491, 2771, 2782, 2760, 4088, 11345, 2778	130	319	6549	1.10545	1	0.998209	100
Annotation Cluster 23	Enrichment Score: 0.6445666050139867
Category	Term	Count	%	PValue	Genes	List Total	Pop Hits	Pop Total	Fold Enrichment	Bonferroni	Benjamini	FDR
GOTERM_CC_FAT	GO:0016323~basolateral plasma membrane	6	3.75	0.0981407	8874, 7094, 3691, 7082, 51474, 1499	127	120	6172	2.42992	1	0.557823	73.5693
GOTERM_CC_FAT	GO:0005912~adherens junction	5	3.125	0.132312	8874, 7094, 7082, 51474, 1499	127	96	6172	2.53117	1	0.607148	83.93
GOTERM_CC_FAT	GO:0030054~cell junction	9	5.625	0.144688	6645, 51421, 1146, 8874, 7094, 7082, 51474, 23034, 1499	127	253	6172	1.7288	1	0.622713	86.6449
GOTERM_CC_FAT	GO:0070161~anchoring junction	5	3.125	0.166486	8874, 7094, 7082, 51474, 1499	127	105	6172	2.31421	1	0.650989	90.4232
SP_PIR_KEYWORDS	cell junction	6	3.75	0.244335	6645, 1146, 7082, 51474, 23034, 1499	160	178	8445	1.77914	1	0.86656	97.4651
GOTERM_CC_FAT	GO:0005925~focal adhesion	3	1.875	0.347539	8874, 7094, 51474	127	60	6172	2.42992	1	0.857177	99.5916
GOTERM_CC_FAT	GO:0005924~cell-substrate adherens junction	3	1.875	0.369788	8874, 7094, 51474	127	63	6172	2.31421	1	0.868184	99.7388
GOTERM_CC_FAT	GO:0005911~cell-cell junction	4	2.5	0.396259	51421, 7094, 7082, 1499	127	111	6172	1.75129	1	0.881824	99.8497
GOTERM_CC_FAT	GO:0030055~cell-substrate junction	3	1.875	0.406185	8874, 7094, 51474	127	68	6172	2.14405	1	0.881125	99.8786
Annotation Cluster 24	Enrichment Score: 0.6031524238009027
Category	Term	Count	%	PValue	Genes	List Total	Pop Hits	Pop Total	Fold Enrichment	Bonferroni	Benjamini	FDR
GOTERM_BP_FAT	GO:0007178~transmembrane receptor protein serine/threonine kinase signaling pathway	5	3.125	0.0300048	2331, 6711, 4088, 6347, 4086	130	60	6549	4.19808	1	0.998765	39.2436
GOTERM_BP_FAT	GO:0007179~transforming growth factor beta receptor signaling pathway	4	2.5	0.0434685	2331, 4088, 6347, 4086	130	40	6549	5.03769	1	0.988992	51.6607
GOTERM_BP_FAT	GO:0017038~protein import	5	3.125	0.117114	4928, 10527, 3839, 6711, 5195	130	95	6549	2.65142	1	0.979994	86.9632
GOTERM_BP_FAT	GO:0043623~cellular protein complex assembly	5	3.125	0.190776	4928, 10527, 2331, 4088, 4086	130	115	6549	2.1903	1	0.974619	96.8646
GOTERM_BP_FAT	GO:0006461~protein complex assembly	10	6.25	0.226281	4928, 6450, 10527, 2331, 3839, 4088, 5195, 4086, 64756, 1499	130	340	6549	1.48167	1	0.981333	98.4949
GOTERM_BP_FAT	GO:0070271~protein complex biogenesis	10	6.25	0.226281	4928, 6450, 10527, 2331, 3839, 4088, 5195, 4086, 64756, 1499	130	340	6549	1.48167	1	0.981333	98.4949
GOTERM_BP_FAT	GO:0034613~cellular protein localization	8	5	0.371996	10971, 4928, 10527, 10267, 3839, 6711, 5195, 1499	130	298	6549	1.3524	1	0.98828	99.9504
GOTERM_BP_FAT	GO:0070727~cellular macromolecule localization	8	5	0.378528	10971, 4928, 10527, 10267, 3839, 6711, 5195, 1499	130	300	6549	1.34338	1	0.987567	99.9582
GOTERM_MF_FAT	GO:0008565~protein transporter activity	3	1.875	0.40236	10527, 10267, 3839	123	70	6200	2.16028	1	0.996032	99.9077
GOTERM_BP_FAT	GO:0006886~intracellular protein transport	7	4.375	0.448417	10971, 4928, 10527, 10267, 3839, 6711, 5195	130	272	6549	1.29646	1	0.993673	99.9941
GOTERM_BP_FAT	GO:0065003~macromolecular complex assembly	10	6.25	0.475523	4928, 6450, 10527, 2331, 3839, 4088, 5195, 4086, 64756, 1499	130	430	6549	1.17156	1	0.994605	99.9974
GOTERM_BP_FAT	GO:0043933~macromolecular complex subunit organization	10	6.25	0.542484	4928, 6450, 10527, 2331, 3839, 4088, 5195, 4086, 64756, 1499	130	454	6549	1.10962	1	0.996855	99.9997
GOTERM_BP_FAT	GO:0034622~cellular macromolecular complex assembly	5	3.125	0.563332	4928, 10527, 2331, 4088, 4086	130	201	6549	1.25316	1	0.997281	99.9999
GOTERM_BP_FAT	GO:0034621~cellular macromolecular complex subunit organization	5	3.125	0.652856	4928, 10527, 2331, 4088, 4086	130	225	6549	1.11949	1	0.99878	100
Annotation Cluster 25	Enrichment Score: 0.6013543818460253
Category	Term	Count	%	PValue	Genes	List Total	Pop Hits	Pop Total	Fold Enrichment	Bonferroni	Benjamini	FDR
GOTERM_BP_FAT	GO:0045597~positive regulation of cell differentiation	6	3.75	0.150985	941, 4088, 2778, 5364, 4086, 1499	130	143	6549	2.11372	1	0.975821	93.1249
GOTERM_BP_FAT	GO:0010769~regulation of cell morphogenesis involved in differentiation	3	1.875	0.214666	4088, 5364, 4086	130	44	6549	3.43479	1	0.978509	98.0795
GOTERM_BP_FAT	GO:0010720~positive regulation of cell development	3	1.875	0.229241	4088, 5364, 4086	130	46	6549	3.28545	1	0.981565	98.5863
GOTERM_BP_FAT	GO:0022604~regulation of cell morphogenesis	4	2.5	0.229303	4088, 4628, 5364, 4086	130	84	6549	2.3989	1	0.980722	98.5882
GOTERM_BP_FAT	GO:0051094~positive regulation of developmental process	6	3.75	0.258323	941, 4088, 2778, 5364, 4086, 1499	130	174	6549	1.73714	1	0.983526	99.2464
GOTERM_BP_FAT	GO:0051130~positive regulation of cellular component organization	4	2.5	0.374523	57534, 4088, 5364, 4086	130	111	6549	1.81538	1	0.987977	99.9536
GOTERM_BP_FAT	GO:0060284~regulation of cell development	4	2.5	0.374523	57534, 4088, 5364, 4086	130	111	6549	1.81538	1	0.987977	99.9536
Annotation Cluster 26	Enrichment Score: 0.5957175261970783
Category	Term	Count	%	PValue	Genes	List Total	Pop Hits	Pop Total	Fold Enrichment	Bonferroni	Benjamini	FDR
SP_PIR_KEYWORDS	metal-binding	32	20	0.138014	151636, 3628, 11107, 64397, 57674, 25797, 57534, 83440, 6827, 79901, 11329, 2273, 50487, 253461, 23326, 158471, 56913, 134218, 9520, 64780, 57140, 2908, 5742, 8543, 2739, 10906, 1593, 51479, 55823, 51283, 85437, 51474	160	1354	8445	1.24742	1	0.768496	85.7468
SP_PIR_KEYWORDS	zinc	23	14.375	0.153665	9520, 64780, 151636, 57140, 11107, 2908, 8543, 57674, 64397, 25797, 57534, 6827, 2739, 10906, 51479, 55823, 2273, 253461, 23326, 51283, 85437, 51474, 134218	160	930	8445	1.30534	1	0.783536	88.7922
GOTERM_MF_FAT	GO:0046914~transition metal ion binding	30	18.75	0.174682	151636, 11107, 64397, 57674, 25797, 57534, 6827, 79901, 2273, 253461, 23326, 158471, 134218, 9520, 64780, 57140, 2908, 5742, 8543, 10906, 2739, 1593, 6307, 51479, 55823, 27247, 81855, 51283, 85437, 51474	123	1241	6200	1.21853	1	0.971326	92.6194
GOTERM_MF_FAT	GO:0008270~zinc ion binding	23	14.375	0.252957	9520, 64780, 151636, 57140, 11107, 2908, 8543, 57674, 64397, 25797, 57534, 6827, 2739, 10906, 51479, 55823, 2273, 253461, 23326, 51283, 85437, 51474, 134218	123	962	6200	1.20515	1	0.990191	98.0919
SP_PIR_KEYWORDS	zinc-finger	16	10	0.302375	151636, 11107, 2908, 57674, 57534, 64397, 6827, 10906, 51479, 55823, 2273, 253461, 23326, 51283, 85437, 134218	160	682	8445	1.23827	1	0.908781	99.1114
GOTERM_MF_FAT	GO:0043167~ion binding	41	25.625	0.379244	3628, 151636, 11107, 801, 64397, 57534, 57674, 25797, 83440, 6827, 79901, 2222, 11329, 2273, 50487, 253461, 23326, 158471, 56913, 134218, 9520, 64121, 6645, 64780, 57140, 8543, 5742, 2908, 81539, 2739, 10906, 115557, 1593, 6307, 51479, 55823, 27247, 81855, 51283, 85437, 51474	123	1931	6200	1.07026	1	0.996555	99.8455
GOTERM_MF_FAT	GO:0046872~metal ion binding	40	25	0.382426	3628, 151636, 11107, 801, 64397, 57534, 57674, 25797, 83440, 6827, 79901, 2222, 11329, 2273, 50487, 253461, 23326, 158471, 56913, 134218, 9520, 64121, 6645, 64780, 57140, 8543, 5742, 2908, 81539, 2739, 10906, 1593, 6307, 51479, 55823, 27247, 81855, 51283, 85437, 51474	123	1883	6200	1.07077	1	0.995251	99.856
GOTERM_MF_FAT	GO:0043169~cation binding	40	25	0.417306	3628, 151636, 11107, 801, 64397, 57534, 57674, 25797, 83440, 6827, 79901, 2222, 11329, 2273, 50487, 253461, 23326, 158471, 56913, 134218, 9520, 64121, 6645, 64780, 57140, 8543, 5742, 2908, 81539, 2739, 10906, 1593, 6307, 51479, 55823, 27247, 81855, 51283, 85437, 51474	123	1906	6200	1.05785	1	0.995704	99.9346
Annotation Cluster 27	Enrichment Score: 0.5930006238468287
Category	Term	Count	%	PValue	Genes	List Total	Pop Hits	Pop Total	Fold Enrichment	Bonferroni	Benjamini	FDR
SP_PIR_KEYWORDS	myristylation	3	1.875	0.102816	2771, 4082, 2778	160	29	8445	5.46013	1	0.730665	75.9058
SP_PIR_KEYWORDS	blocked amino end	3	1.875	0.394429	2771, 4082, 2778	160	72	8445	2.19922	1	0.934315	99.8612
SP_PIR_KEYWORDS	lipoprotein	8	5	0.410173	3351, 2771, 4082, 26003, 5899, 55970, 51762, 2778	160	324	8445	1.30324	1	0.936295	99.9017
Annotation Cluster 28	Enrichment Score: 0.5874260923437123
Category	Term	Count	%	PValue	Genes	List Total	Pop Hits	Pop Total	Fold Enrichment	Bonferroni	Benjamini	FDR
GOTERM_BP_FAT	GO:0010557~positive regulation of macromolecule biosynthetic process	13	8.125	0.058932	29966, 941, 6827, 116496, 1499, 9210, 253461, 23326, 4088, 10725, 4086, 23034, 6925	130	369	6549	1.7748	1	0.977963	62.9726
GOTERM_BP_FAT	GO:0045892~negative regulation of transcription, DNA-dependent	8	5	0.0721123	10971, 29966, 4088, 3281, 5195, 6827, 6925, 1499	130	185	6549	2.17846	1	0.986325	70.6013
GOTERM_BP_FAT	GO:0051253~negative regulation of RNA metabolic process	8	5	0.0788327	10971, 29966, 4088, 3281, 5195, 6827, 6925, 1499	130	189	6549	2.13236	1	0.986863	73.897
GOTERM_BP_FAT	GO:0031328~positive regulation of cellular biosynthetic process	13	8.125	0.0842545	29966, 941, 6827, 116496, 1499, 9210, 253461, 23326, 4088, 10725, 4086, 23034, 6925	130	392	6549	1.67066	1	0.988497	76.2996
GOTERM_BP_FAT	GO:0009891~positive regulation of biosynthetic process	13	8.125	0.0892687	29966, 941, 6827, 116496, 1499, 9210, 253461, 23326, 4088, 10725, 4086, 23034, 6925	130	396	6549	1.65379	1	0.987782	78.3353
GOTERM_BP_FAT	GO:0045941~positive regulation of transcription	11	6.875	0.0988742	9210, 29966, 941, 253461, 4088, 10725, 23326, 6827, 4086, 6925, 1499	130	320	6549	1.73171	1	0.984412	81.7849
GOTERM_CC_FAT	GO:0005667~transcription factor complex	6	3.75	0.103465	8543, 4088, 1874, 4086, 6925, 1499	127	122	6172	2.39009	1	0.5436	75.5104
GOTERM_BP_FAT	GO:0010628~positive regulation of gene expression	11	6.875	0.113229	9210, 29966, 941, 253461, 4088, 10725, 23326, 6827, 4086, 6925, 1499	130	329	6549	1.68433	1	0.980985	85.9925
GOTERM_BP_FAT	GO:0010604~positive regulation of macromolecule metabolic process	15	9.375	0.117884	152503, 29966, 941, 6827, 116496, 1499, 9210, 9491, 253461, 23326, 4088, 10725, 4086, 23034, 6925	130	503	6549	1.50229	1	0.978668	87.1479
GOTERM_BP_FAT	GO:0000122~negative regulation of transcription from RNA polymerase II promoter	6	3.75	0.129936	29966, 4088, 3281, 6827, 6925, 1499	130	136	6549	2.22251	1	0.978177	89.7377
GOTERM_MF_FAT	GO:0016564~transcription repressor activity	7	4.375	0.130087	5204, 29966, 11107, 4088, 3281, 5195, 6925	123	175	6200	2.01626	1	0.985285	84.9218
GOTERM_MF_FAT	GO:0030528~transcription regulator activity	19	11.875	0.155203	29966, 941, 11107, 8543, 2908, 3281, 5195, 1874, 6827, 10362, 1499, 5204, 253461, 4088, 10725, 23326, 9013, 4086, 6925	123	710	6200	1.34891	1	0.976346	89.8696
SP_PIR_KEYWORDS	activator	9	5.625	0.155748	11107, 253461, 10725, 23326, 55588, 6827, 1874, 6925, 1499	160	279	8445	1.70262	1	0.777131	89.1487
GOTERM_BP_FAT	GO:0045935~positive regulation of nucleobase, nucleoside, nucleotide and nucleic acid metabolic process	11	6.875	0.156952	9210, 29966, 941, 253461, 4088, 10725, 23326, 6827, 4086, 6925, 1499	130	353	6549	1.56982	1	0.975071	93.8739
GOTERM_MF_FAT	GO:0003700~transcription factor activity	12	7.5	0.174108	29966, 253461, 8543, 2908, 4088, 10725, 10362, 6827, 1874, 4086, 6925, 1499	123	406	6200	1.48985	1	0.976413	92.5495
GOTERM_BP_FAT	GO:0010629~negative regulation of gene expression	9	5.625	0.181515	10971, 29966, 4088, 3281, 5195, 6827, 4086, 6925, 1499	130	278	6549	1.63091	1	0.973194	96.2232
GOTERM_BP_FAT	GO:0045934~negative regulation of nucleobase, nucleoside, nucleotide and nucleic acid metabolic process	9	5.625	0.183965	10971, 3351, 29966, 4088, 3281, 5195, 6827, 6925, 1499	130	279	6549	1.62506	1	0.973315	96.4039
GOTERM_BP_FAT	GO:0051173~positive regulation of nitrogen compound metabolic process	11	6.875	0.192399	9210, 29966, 941, 253461, 4088, 10725, 23326, 6827, 4086, 6925, 1499	130	370	6549	1.49769	1	0.974278	96.9659
GOTERM_BP_FAT	GO:0051172~negative regulation of nitrogen compound metabolic process	9	5.625	0.19391	10971, 3351, 29966, 4088, 3281, 5195, 6827, 6925, 1499	130	283	6549	1.60209	1	0.97265	97.0574
GOTERM_BP_FAT	GO:0045944~positive regulation of transcription from RNA polymerase II promoter	7	4.375	0.195129	29966, 253461, 4088, 10725, 6827, 4086, 1499	130	198	6549	1.781	1	0.972096	97.1294
GOTERM_CC_FAT	GO:0005654~nucleoplasm	16	10	0.19655	29966, 801, 8543, 1874, 6827, 1499, 4928, 81669, 11329, 9493, 23326, 4088, 9013, 85437, 4086, 6925	127	577	6172	1.34762	1	0.709131	94.0337
GOTERM_BP_FAT	GO:0016481~negative regulation of transcription	8	5	0.216424	10971, 29966, 4088, 3281, 5195, 6827, 6925, 1499	130	248	6549	1.62506	1	0.978282	98.1486
GOTERM_MF_FAT	GO:0003714~transcription corepressor activity	4	2.5	0.223608	5204, 3281, 5195, 6925	123	83	6200	2.42923	1	0.988155	96.7805
GOTERM_BP_FAT	GO:0031327~negative regulation of cellular biosynthetic process	9	5.625	0.257889	10971, 3351, 29966, 4088, 3281, 5195, 6827, 6925, 1499	130	307	6549	1.47685	1	0.984094	99.2392
GOTERM_BP_FAT	GO:0009890~negative regulation of biosynthetic process	9	5.625	0.28059	10971, 3351, 29966, 4088, 3281, 5195, 6827, 6925, 1499	130	315	6549	1.43934	1	0.986442	99.5423
GOTERM_BP_FAT	GO:0045893~positive regulation of transcription, DNA-dependent	8	5	0.288538	29966, 253461, 4088, 10725, 6827, 4086, 6925, 1499	130	272	6549	1.48167	1	0.984357	99.6183
GOTERM_MF_FAT	GO:0008134~transcription factor binding	9	5.625	0.291029	5204, 8543, 4088, 23326, 3281, 5195, 1874, 6925, 1499	123	319	6200	1.42213	1	0.989758	99.062
GOTERM_BP_FAT	GO:0051254~positive regulation of RNA metabolic process	8	5	0.297961	29966, 253461, 4088, 10725, 6827, 4086, 6925, 1499	130	275	6549	1.46551	1	0.984489	99.6931
GOTERM_BP_FAT	GO:0010605~negative regulation of macromolecule metabolic process	11	6.875	0.342567	9491, 10971, 29966, 4088, 3281, 5195, 6827, 4086, 116496, 6925, 1499	130	431	6549	1.28572	1	0.987606	99.8951
GOTERM_BP_FAT	GO:0006357~regulation of transcription from RNA polymerase II promoter	10	6.25	0.361209	29966, 253461, 4088, 10725, 3281, 6827, 1874, 4086, 6925, 1499	130	390	6549	1.29172	1	0.988259	99.9345
GOTERM_BP_FAT	GO:0010558~negative regulation of macromolecule biosynthetic process	8	5	0.381796	10971, 29966, 4088, 3281, 5195, 6827, 6925, 1499	130	301	6549	1.33892	1	0.98741	99.9617
GOTERM_CC_FAT	GO:0031981~nuclear lumen	21	13.125	0.41725	55920, 29966, 152503, 801, 6711, 8543, 2908, 64397, 1874, 6827, 1499, 4928, 81669, 11329, 9493, 4088, 23326, 9013, 85437, 4086, 6925	127	920	6172	1.10931	1	0.885725	99.9047
GOTERM_CC_FAT	GO:0044451~nucleoplasm part	9	5.625	0.448884	81669, 11329, 8543, 4088, 23326, 1874, 4086, 6925, 1499	127	358	6172	1.22175	1	0.904959	99.9536
GOTERM_MF_FAT	GO:0003712~transcription cofactor activity	6	3.75	0.460197	5204, 23326, 3281, 5195, 6925, 1499	123	226	6200	1.33823	1	0.997166	99.9768
GOTERM_BP_FAT	GO:0032583~regulation of gene-specific transcription	3	1.875	0.508441	4088, 5195, 1499	130	86	6549	1.75733	1	0.995822	99.9991
KEGG_PATHWAY	hsa04310:Wnt signaling pathway	3	1.875	0.544991	4088, 10725, 1499	59	87	2795	1.63355	1	0.990208	99.9823
GOTERM_BP_FAT	GO:0006355~regulation of transcription, DNA-dependent	15	9.375	0.54549	10971, 29966, 2908, 5195, 3281, 1874, 6827, 10362, 1499, 5204, 253461, 4088, 10725, 4086, 6925	130	712	6549	1.06131	1	0.996805	99.9997
SP_PIR_KEYWORDS	transcription regulation	16	10	0.59312	11107, 8543, 2908, 55588, 1874, 6827, 10362, 1499, 81669, 253461, 23326, 4088, 10725, 9013, 4086, 6925	160	823	8445	1.02612	1	0.967193	99.9992
GOTERM_BP_FAT	GO:0051252~regulation of RNA metabolic process	15	9.375	0.608473	10971, 29966, 2908, 5195, 3281, 1874, 6827, 10362, 1499, 5204, 253461, 4088, 10725, 4086, 6925	130	741	6549	1.01978	1	0.99824	100
GOTERM_CC_FAT	GO:0070013~intracellular organelle lumen	24	15	0.61683	3712, 64714, 55920, 29966, 152503, 801, 6711, 8543, 2908, 64397, 1874, 6827, 1499, 1593, 4928, 81669, 11329, 9493, 4088, 23326, 9013, 85437, 4086, 6925	127	1170	6172	0.996891	1	0.964682	99.9996
GOTERM_BP_FAT	GO:0045449~regulation of transcription	22	13.75	0.640789	10971, 29966, 941, 11107, 8543, 2908, 3281, 5195, 55588, 1874, 6827, 10362, 1499, 9210, 81669, 5204, 253461, 4088, 10725, 23326, 4086, 6925	130	1123	6549	0.986903	1	0.998578	100
SP_PIR_KEYWORDS	Transcription	16	10	0.64824	11107, 8543, 2908, 55588, 1874, 6827, 10362, 1499, 81669, 253461, 23326, 4088, 10725, 9013, 4086, 6925	160	852	8445	0.991197	1	0.976615	99.9999
GOTERM_BP_FAT	GO:0006350~transcription	17	10.625	0.663999	64121, 11107, 8543, 2908, 55588, 1874, 6827, 10362, 1499, 81669, 253461, 10725, 23326, 4088, 9013, 4086, 6925	130	874	6549	0.979872	1	0.998906	100
GOTERM_CC_FAT	GO:0043233~organelle lumen	24	15	0.671995	3712, 64714, 55920, 29966, 152503, 801, 6711, 8543, 2908, 64397, 1874, 6827, 1499, 1593, 4928, 81669, 11329, 9493, 4088, 23326, 9013, 85437, 4086, 6925	127	1202	6172	0.970351	1	0.973192	99.9999
GOTERM_CC_FAT	GO:0031974~membrane-enclosed lumen	24	15	0.710662	3712, 64714, 55920, 29966, 152503, 801, 6711, 8543, 2908, 64397, 1874, 6827, 1499, 1593, 4928, 81669, 11329, 9493, 4088, 23326, 9013, 85437, 4086, 6925	127	1226	6172	0.951356	1	0.978009	100
GOTERM_MF_FAT	GO:0003677~DNA binding	15	9.375	0.89119	29966, 11107, 8543, 2908, 1874, 6827, 10362, 1499, 253461, 4088, 10725, 23075, 9013, 4086, 6925	123	927	6200	0.815639	1	0.999996	100
SP_PIR_KEYWORDS	dna-binding	9	5.625	0.951074	11107, 253461, 2908, 10725, 23075, 9013, 10362, 1874, 6925	160	684	8445	0.69449	1	0.999723	100
Annotation Cluster 29	Enrichment Score: 0.5649172258670607
Category	Term	Count	%	PValue	Genes	List Total	Pop Hits	Pop Total	Fold Enrichment	Bonferroni	Benjamini	FDR
SP_PIR_KEYWORDS	thiolester bond	3	1.875	0.068863	3351, 2771, 2778	160	23	8445	6.88451	1	0.672543	60.778
GOTERM_BP_FAT	GO:0007186~G-protein coupled receptor protein signaling pathway	9	5.625	0.135781	3351, 2771, 81669, 10267, 2782, 801, 55970, 6347, 2778	130	258	6549	1.75733	1	0.973529	90.809
GOTERM_BP_FAT	GO:0007187~G-protein signaling, coupled to cyclic nucleotide second messenger	4	2.5	0.159082	3351, 2771, 6347, 2778	130	70	6549	2.87868	1	0.971867	94.1224
SP_PIR_KEYWORDS	transducer	6	3.75	0.177188	3351, 2771, 81669, 2782, 55970, 2778	160	158	8445	2.00435	1	0.812404	92.2564
GOTERM_BP_FAT	GO:0019935~cyclic-nucleotide-mediated signaling	4	2.5	0.2086	3351, 2771, 6347, 2778	130	80	6549	2.51885	1	0.976791	97.8219
GOTERM_BP_FAT	GO:0019932~second-messenger-mediated signaling	5	3.125	0.284155	3351, 2771, 2782, 6347, 2778	130	137	6549	1.83857	1	0.984995	99.578
GOTERM_BP_FAT	GO:0030817~regulation of cAMP biosynthetic process	3	1.875	0.32447	3351, 2771, 2778	130	59	6549	2.56154	1	0.986101	99.8365
GOTERM_BP_FAT	GO:0030814~regulation of cAMP metabolic process	3	1.875	0.338963	3351, 2771, 2778	130	61	6549	2.47755	1	0.988192	99.8853
GOTERM_BP_FAT	GO:0030808~regulation of nucleotide biosynthetic process	3	1.875	0.374754	3351, 2771, 2778	130	66	6549	2.28986	1	0.987637	99.9539
GOTERM_BP_FAT	GO:0030802~regulation of cyclic nucleotide biosynthetic process	3	1.875	0.374754	3351, 2771, 2778	130	66	6549	2.28986	1	0.987637	99.9539
SP_PIR_KEYWORDS	palmitate	4	2.5	0.378905	3351, 2771, 26003, 2778	160	117	8445	1.80449	1	0.936333	99.8065
GOTERM_BP_FAT	GO:0030799~regulation of cyclic nucleotide metabolic process	3	1.875	0.388858	3351, 2771, 2778	130	68	6549	2.22251	1	0.987582	99.9682
GOTERM_BP_FAT	GO:0006140~regulation of nucleotide metabolic process	3	1.875	0.409748	3351, 2771, 2778	130	71	6549	2.1286	1	0.9906	99.982
SP_PIR_KEYWORDS	lipoprotein	8	5	0.410173	3351, 2771, 4082, 26003, 5899, 55970, 51762, 2778	160	324	8445	1.30324	1	0.936295	99.9017
UP_SEQ_FEATURE	lipid moiety-binding region:S-palmitoyl cysteine	3	1.875	0.562169	3351, 2771, 2778	159	100	8439	1.59226	1	1	99.9996
Annotation Cluster 30	Enrichment Score: 0.5505835239829759
Category	Term	Count	%	PValue	Genes	List Total	Pop Hits	Pop Total	Fold Enrichment	Bonferroni	Benjamini	FDR
SP_PIR_KEYWORDS	microtubule	7	4.375	0.0274237	55920, 6645, 9493, 5048, 10749, 10540, 9371	160	122	8445	3.02843	0.999387	0.6033	30.5637
GOTERM_CC_FAT	GO:0005874~microtubule	8	5	0.0312238	55920, 6645, 801, 9493, 5048, 10749, 10540, 9371	127	148	6172	2.62694	0.999457	0.357403	33.5441
GOTERM_CC_FAT	GO:0000775~chromosome, centromeric region	5	3.125	0.069109	55920, 4928, 5048, 91687, 10540	127	76	6172	3.19726	1	0.506967	60.2477
GOTERM_CC_FAT	GO:0005819~spindle	5	3.125	0.128712	55920, 801, 9493, 4628, 5048	127	95	6172	2.55781	1	0.606622	83.0496
GOTERM_BP_FAT	GO:0007049~cell cycle	14	8.75	0.131906	55920, 11107, 801, 5048, 1874, 10362, 10540, 1499, 9491, 9493, 23326, 4088, 4628, 158471	130	469	6549	1.50379	1	0.972348	90.1111
GOTERM_CC_FAT	GO:0005875~microtubule associated complex	4	2.5	0.137138	9493, 5048, 10540, 9371	127	63	6172	3.08561	1	0.611242	85.0441
GOTERM_BP_FAT	GO:0007017~microtubule-based process	6	3.75	0.150985	9493, 5048, 10749, 1499, 10540, 9371	130	143	6549	2.11372	1	0.975821	93.1249
GOTERM_BP_FAT	GO:0022402~cell cycle process	10	6.25	0.231288	55920, 9491, 9493, 4088, 4628, 5048, 158471, 1874, 1499, 10540	130	342	6549	1.47301	1	0.979724	98.6465
GOTERM_CC_FAT	GO:0000776~kinetochore	3	1.875	0.271935	4928, 5048, 10540	127	50	6172	2.91591	1	0.79817	98.3231
GOTERM_BP_FAT	GO:0000226~microtubule cytoskeleton organization	4	2.5	0.320365	9493, 5048, 1499, 10540	130	101	6549	1.99513	1	0.986166	99.8195
GOTERM_BP_FAT	GO:0000278~mitotic cell cycle	7	4.375	0.32432	55920, 9491, 11107, 9493, 5048, 1874, 10540	130	237	6549	1.48793	1	0.986555	99.8359
GOTERM_BP_FAT	GO:0007067~mitosis	4	2.5	0.46936	55920, 9493, 5048, 10540	130	129	6549	1.56208	1	0.994613	99.9968
GOTERM_BP_FAT	GO:0000280~nuclear division	4	2.5	0.46936	55920, 9493, 5048, 10540	130	129	6549	1.56208	1	0.994613	99.9968
GOTERM_BP_FAT	GO:0000087~M phase of mitotic cell cycle	4	2.5	0.474459	55920, 9493, 5048, 10540	130	130	6549	1.55006	1	0.994689	99.9973
GOTERM_BP_FAT	GO:0022403~cell cycle phase	6	3.75	0.484054	55920, 9493, 5048, 158471, 1874, 10540	130	232	6549	1.30285	1	0.994795	99.998
GOTERM_BP_FAT	GO:0048285~organelle fission	4	2.5	0.49463	55920, 9493, 5048, 10540	130	134	6549	1.50379	1	0.995439	99.9986
SP_PIR_KEYWORDS	cell cycle	6	3.75	0.582142	55920, 9493, 23326, 5048, 10362, 1874	160	271	8445	1.16859	1	0.965403	99.9989
SP_PIR_KEYWORDS	mitosis	3	1.875	0.6223	55920, 9493, 5048	160	111	8445	1.42652	1	0.972597	99.9997
GOTERM_CC_FAT	GO:0044427~chromosomal part	5	3.125	0.623142	55920, 4928, 5048, 91687, 10540	127	209	6172	1.16264	1	0.964984	99.9997
GOTERM_BP_FAT	GO:0000279~M phase	4	2.5	0.675664	55920, 9493, 5048, 10540	130	175	6549	1.15147	1	0.999063	100
GOTERM_BP_FAT	GO:0051301~cell division	4	2.5	0.683163	55920, 9493, 4628, 5048	130	177	6549	1.13846	1	0.999045	100
GOTERM_CC_FAT	GO:0005694~chromosome	5	3.125	0.752352	55920, 4928, 5048, 91687, 10540	127	248	6172	0.979807	1	0.984812	100
SP_PIR_KEYWORDS	cell division	3	1.875	0.813853	55920, 9493, 5048	160	162	8445	0.977431	1	0.994811	100
Annotation Cluster 31	Enrichment Score: 0.5346302592351307
Category	Term	Count	%	PValue	Genes	List Total	Pop Hits	Pop Total	Fold Enrichment	Bonferroni	Benjamini	FDR
GOTERM_BP_FAT	GO:0045597~positive regulation of cell differentiation	6	3.75	0.150985	941, 4088, 2778, 5364, 4086, 1499	130	143	6549	2.11372	1	0.975821	93.1249
GOTERM_BP_FAT	GO:0046649~lymphocyte activation	5	3.125	0.15967	941, 4088, 3476, 23075, 1499	130	107	6549	2.35406	1	0.970697	94.1891
GOTERM_BP_FAT	GO:0051094~positive regulation of developmental process	6	3.75	0.258323	941, 4088, 2778, 5364, 4086, 1499	130	174	6549	1.73714	1	0.983526	99.2464
GOTERM_BP_FAT	GO:0045321~leukocyte activation	5	3.125	0.266557	941, 4088, 3476, 23075, 1499	130	133	6549	1.89387	1	0.983922	99.3722
GOTERM_BP_FAT	GO:0001775~cell activation	5	3.125	0.360354	941, 4088, 3476, 23075, 1499	130	154	6549	1.63561	1	0.988881	99.933
GOTERM_BP_FAT	GO:0042110~T cell activation	3	1.875	0.416636	941, 4088, 1499	130	72	6549	2.09904	1	0.991254	99.9852
GOTERM_MF_FAT	GO:0016563~transcription activator activity	5	3.125	0.726091	941, 4088, 23326, 4086, 1499	123	248	6200	1.01626	1	0.999896	100
Annotation Cluster 32	Enrichment Score: 0.5022344350183495
Category	Term	Count	%	PValue	Genes	List Total	Pop Hits	Pop Total	Fold Enrichment	Bonferroni	Benjamini	FDR
UP_SEQ_FEATURE	metal ion-binding site:Iron (heme axial ligand)	3	1.875	0.212718	1593, 5742, 79901	159	46	8439	3.46144	1	1	97.2787
GOTERM_MF_FAT	GO:0005506~iron ion binding	6	3.75	0.268851	1593, 6307, 27247, 81855, 5742, 79901	123	177	6200	1.7087	1	0.989259	98.575
SP_PIR_KEYWORDS	heme	3	1.875	0.305431	1593, 5742, 79901	160	59	8445	2.68379	1	0.90601	99.1612
SP_PIR_KEYWORDS	iron	5	3.125	0.381223	1593, 6307, 81855, 5742, 79901	160	166	8445	1.5898	1	0.930056	99.8157
SP_PIR_KEYWORDS	oxidoreductase	8	5	0.462827	3712, 1593, 6307, 2222, 6713, 5742, 3156, 79901	160	341	8445	1.23827	1	0.947755	99.9712
Annotation Cluster 33	Enrichment Score: 0.4923409510106722
Category	Term	Count	%	PValue	Genes	List Total	Pop Hits	Pop Total	Fold Enrichment	Bonferroni	Benjamini	FDR
GOTERM_MF_FAT	GO:0017016~Ras GTPase binding	3	1.875	0.2802	55770, 10527, 79109	123	53	6200	2.8532	1	0.989557	98.8477
GOTERM_MF_FAT	GO:0031267~small GTPase binding	3	1.875	0.324042	55770, 10527, 79109	123	59	6200	2.56304	1	0.993368	99.509
GOTERM_MF_FAT	GO:0051020~GTPase binding	3	1.875	0.367203	55770, 10527, 79109	123	65	6200	2.32645	1	0.996461	99.7995
Annotation Cluster 34	Enrichment Score: 0.4805572212587574
Category	Term	Count	%	PValue	Genes	List Total	Pop Hits	Pop Total	Fold Enrichment	Bonferroni	Benjamini	FDR
UP_SEQ_FEATURE	lipid moiety-binding region:N-myristoyl glycine	3	1.875	0.282258	2771, 4082, 26003	159	56	8439	2.84333	1	1	99.3246
SP_PIR_KEYWORDS	myristate	3	1.875	0.312403	2771, 4082, 26003	160	60	8445	2.63906	1	0.906721	99.2651
SP_PIR_KEYWORDS	lipoprotein	8	5	0.410173	3351, 2771, 4082, 26003, 5899, 55970, 51762, 2778	160	324	8445	1.30324	1	0.936295	99.9017
Annotation Cluster 35	Enrichment Score: 0.4747506080872545
Category	Term	Count	%	PValue	Genes	List Total	Pop Hits	Pop Total	Fold Enrichment	Bonferroni	Benjamini	FDR
UP_SEQ_FEATURE	nucleotide phosphate-binding region:FAD	3	1.875	0.192154	3712, 64780, 6713	159	43	8439	3.70294	1	1	95.9864
SP_PIR_KEYWORDS	Flavoprotein	3	1.875	0.420832	3712, 64780, 6713	160	76	8445	2.08347	1	0.938814	99.9226
SP_PIR_KEYWORDS	FAD	3	1.875	0.465576	3712, 64780, 6713	160	83	8445	1.90776	1	0.943503	99.9731
Annotation Cluster 36	Enrichment Score: 0.4620124965360582
Category	Term	Count	%	PValue	Genes	List Total	Pop Hits	Pop Total	Fold Enrichment	Bonferroni	Benjamini	FDR
UP_SEQ_FEATURE	repeat:WD 2	6	3.75	0.200047	84942, 29966, 2782, 64397, 5048, 80304	159	167	8439	1.9069	1	1	96.5384
UP_SEQ_FEATURE	repeat:WD 1	6	3.75	0.200047	84942, 29966, 2782, 64397, 5048, 80304	159	167	8439	1.9069	1	1	96.5384
SP_PIR_KEYWORDS	wd repeat	6	3.75	0.206104	84942, 29966, 2782, 64397, 5048, 80304	160	167	8445	1.89633	1	0.83564	95.1568
INTERPRO	IPR019775:WD40 repeat, conserved site	6	3.75	0.206572	84942, 29966, 2782, 64397, 5048, 80304	147	167	7752	1.89466	1	0.999979	95.9019
INTERPRO	IPR015943:WD40/YVTN repeat-like	6	3.75	0.255054	84942, 29966, 2782, 64397, 5048, 5364	147	181	7752	1.74811	1	0.999954	98.2839
INTERPRO	IPR001680:WD40 repeat	5	3.125	0.364383	84942, 29966, 2782, 64397, 5048	147	162	7752	1.62761	1	0.999987	99.8082
UP_SEQ_FEATURE	repeat:WD 3	5	3.125	0.364389	84942, 29966, 2782, 64397, 5048	159	163	8439	1.62808	1	1	99.8918
SMART	SM00320:WD40	5	3.125	0.388336	84942, 29966, 2782, 64397, 5048	81	162	4108	1.56531	1	0.997257	99.489
UP_SEQ_FEATURE	repeat:WD 6	4	2.5	0.390839	29966, 2782, 64397, 5048	159	120	8439	1.76918	1	1	99.943
INTERPRO	IPR019782:WD40 repeat 2	4	2.5	0.493676	29966, 2782, 64397, 5048	147	140	7752	1.50671	1	0.999999	99.9917
UP_SEQ_FEATURE	repeat:WD 5	4	2.5	0.513124	29966, 2782, 64397, 5048	159	145	8439	1.46415	1	1	99.9981
INTERPRO	IPR017986:WD40 repeat, region	4	2.5	0.517256	29966, 2782, 64397, 5048	147	145	7752	1.45475	1	0.999999	99.9957
INTERPRO	IPR019781:WD40 repeat, subgroup	4	2.5	0.531122	29966, 2782, 64397, 5048	147	148	7752	1.42526	1	0.999999	99.9971
UP_SEQ_FEATURE	repeat:WD 4	4	2.5	0.558309	29966, 2782, 64397, 5048	159	154	8439	1.37858	1	1	99.9996
Annotation Cluster 37	Enrichment Score: 0.4492451796915294
Category	Term	Count	%	PValue	Genes	List Total	Pop Hits	Pop Total	Fold Enrichment	Bonferroni	Benjamini	FDR
GOTERM_BP_FAT	GO:0007187~G-protein signaling, coupled to cyclic nucleotide second messenger	4	2.5	0.159082	3351, 2771, 6347, 2778	130	70	6549	2.87868	1	0.971867	94.1224
GOTERM_BP_FAT	GO:0019935~cyclic-nucleotide-mediated signaling	4	2.5	0.2086	3351, 2771, 6347, 2778	130	80	6549	2.51885	1	0.976791	97.8219
GOTERM_BP_FAT	GO:0019932~second-messenger-mediated signaling	5	3.125	0.284155	3351, 2771, 2782, 6347, 2778	130	137	6549	1.83857	1	0.984995	99.578
GOTERM_BP_FAT	GO:0050804~regulation of synaptic transmission	3	1.875	0.443776	3351, 2771, 6347	130	76	6549	1.98856	1	0.993422	99.9932
GOTERM_BP_FAT	GO:0051969~regulation of transmission of nerve impulse	3	1.875	0.476707	3351, 2771, 6347	130	81	6549	1.86581	1	0.99453	99.9975
GOTERM_BP_FAT	GO:0031644~regulation of neurological system process	3	1.875	0.502194	3351, 2771, 6347	130	85	6549	1.77801	1	0.995538	99.9989
GOTERM_BP_FAT	GO:0044057~regulation of system process	4	2.5	0.715329	3351, 2771, 5742, 6347	130	186	6549	1.08337	1	0.999367	100
Annotation Cluster 38	Enrichment Score: 0.4463806776616364
Category	Term	Count	%	PValue	Genes	List Total	Pop Hits	Pop Total	Fold Enrichment	Bonferroni	Benjamini	FDR
GOTERM_CC_FAT	GO:0043296~apical junction complex	3	1.875	0.332565	51421, 7082, 1499	127	58	6172	2.51371	1	0.847237	99.4529
GOTERM_CC_FAT	GO:0016327~apicolateral plasma membrane	3	1.875	0.347539	51421, 7082, 1499	127	60	6172	2.42992	1	0.857177	99.5916
GOTERM_CC_FAT	GO:0005911~cell-cell junction	4	2.5	0.396259	51421, 7094, 7082, 1499	127	111	6172	1.75129	1	0.881824	99.8497
Annotation Cluster 39	Enrichment Score: 0.4403957065919415
Category	Term	Count	%	PValue	Genes	List Total	Pop Hits	Pop Total	Fold Enrichment	Bonferroni	Benjamini	FDR
GOTERM_BP_FAT	GO:0051028~mRNA transport	3	1.875	0.302591	4928, 9961, 9887	130	56	6549	2.69876	1	0.983972	99.7246
GOTERM_BP_FAT	GO:0050658~RNA transport	3	1.875	0.360522	4928, 9961, 9887	130	64	6549	2.36142	1	0.988526	99.9333
GOTERM_BP_FAT	GO:0050657~nucleic acid transport	3	1.875	0.360522	4928, 9961, 9887	130	64	6549	2.36142	1	0.988526	99.9333
GOTERM_BP_FAT	GO:0051236~establishment of RNA localization	3	1.875	0.360522	4928, 9961, 9887	130	64	6549	2.36142	1	0.988526	99.9333
GOTERM_BP_FAT	GO:0006403~RNA localization	3	1.875	0.367653	4928, 9961, 9887	130	65	6549	2.32509	1	0.988263	99.9445
GOTERM_BP_FAT	GO:0015931~nucleobase, nucleoside, nucleotide and nucleic acid transport	3	1.875	0.437055	4928, 9961, 9887	130	75	6549	2.01508	1	0.993167	99.9917
Annotation Cluster 40	Enrichment Score: 0.4262634942842043
Category	Term	Count	%	PValue	Genes	List Total	Pop Hits	Pop Total	Fold Enrichment	Bonferroni	Benjamini	FDR
GOTERM_MF_FAT	GO:0003924~GTPase activity	6	3.75	0.11258	64121, 2771, 2782, 5899, 51762, 2778	123	130	6200	2.32645	1	0.987956	80.2381
GOTERM_BP_FAT	GO:0007264~small GTPase mediated signal transduction	6	3.75	0.288691	64121, 10971, 2782, 5899, 8874, 51762	130	182	6549	1.66078	1	0.98379	99.6197
UP_SEQ_FEATURE	nucleotide phosphate-binding region:GTP	5	3.125	0.349923	64121, 2771, 5899, 51762, 2778	159	160	8439	1.65861	1	1	99.8481
SP_PIR_KEYWORDS	lipoprotein	8	5	0.410173	3351, 2771, 4082, 26003, 5899, 55970, 51762, 2778	160	324	8445	1.30324	1	0.936295	99.9017
SP_PIR_KEYWORDS	gtp-binding	5	3.125	0.436708	64121, 2771, 5899, 51762, 2778	160	179	8445	1.47434	1	0.940826	99.9463
GOTERM_MF_FAT	GO:0005525~GTP binding	5	3.125	0.570604	64121, 2771, 5899, 51762, 2778	123	203	6200	1.24154	1	0.998957	99.999
GOTERM_MF_FAT	GO:0019001~guanyl nucleotide binding	5	3.125	0.578451	64121, 2771, 5899, 51762, 2778	123	205	6200	1.22943	1	0.998939	99.9992
GOTERM_MF_FAT	GO:0032561~guanyl ribonucleotide binding	5	3.125	0.578451	64121, 2771, 5899, 51762, 2778	123	205	6200	1.22943	1	0.998939	99.9992
Annotation Cluster 41	Enrichment Score: 0.40841526968442304
Category	Term	Count	%	PValue	Genes	List Total	Pop Hits	Pop Total	Fold Enrichment	Bonferroni	Benjamini	FDR
GOTERM_BP_FAT	GO:0006887~exocytosis	3	1.875	0.258561	10640, 55770, 4628	130	50	6549	3.02262	1	0.982888	99.2504
GOTERM_BP_FAT	GO:0032940~secretion by cell	4	2.5	0.342069	10640, 55770, 4628, 2778	130	105	6549	1.91912	1	0.98836	99.8938
GOTERM_BP_FAT	GO:0046903~secretion	5	3.125	0.342319	10640, 55770, 10725, 4628, 2778	130	150	6549	1.67923	1	0.987986	99.8945
GOTERM_BP_FAT	GO:0016192~vesicle-mediated transport	7	4.375	0.767772	10640, 55770, 152503, 11345, 4628, 10749, 1499	130	380	6549	0.927996	1	0.999626	100
Annotation Cluster 42	Enrichment Score: 0.3977548624304073
Category	Term	Count	%	PValue	Genes	List Total	Pop Hits	Pop Total	Fold Enrichment	Bonferroni	Benjamini	FDR
GOTERM_BP_FAT	GO:0006366~transcription from RNA polymerase II promoter	5	3.125	0.301926	8543, 2908, 10725, 9013, 6827	130	141	6549	1.78642	1	0.984372	99.7203
GOTERM_BP_FAT	GO:0006351~transcription, DNA-dependent	5	3.125	0.45852	8543, 2908, 10725, 9013, 6827	130	176	6549	1.43116	1	0.994222	99.9956
GOTERM_BP_FAT	GO:0032774~RNA biosynthetic process	5	3.125	0.462888	8543, 2908, 10725, 9013, 6827	130	177	6549	1.42308	1	0.994421	99.9962
Annotation Cluster 43	Enrichment Score: 0.3966445818695917
Category	Term	Count	%	PValue	Genes	List Total	Pop Hits	Pop Total	Fold Enrichment	Bonferroni	Benjamini	FDR
GOTERM_CC_FAT	GO:0044459~plasma membrane part	33	20.625	0.0103806	10894, 10267, 941, 1146, 1499, 79901, 81669, 51421, 55970, 7082, 3105, 23034, 6645, 5899, 54741, 1441, 4179, 6711, 8874, 5195, 3691, 81848, 2778, 5364, 23345, 3351, 55823, 2782, 2760, 7094, 51283, 51762, 51474	127	1050	6172	1.52738	0.915674	0.265917	12.5777
SP_PIR_KEYWORDS	transmembrane protein	12	7.5	0.0735969	1593, 3351, 81669, 2222, 3340, 941, 1146, 1441, 3339, 81539, 3691, 3105	160	357	8445	1.77416	1	0.67687	63.3146
SP_PIR_KEYWORDS	receptor	12	7.5	0.246568	10894, 3351, 81669, 10267, 54741, 941, 1146, 1441, 2908, 11345, 3691, 5364	160	459	8445	1.3799	1	0.862181	97.5616
GOTERM_CC_FAT	GO:0005887~integral to plasma membrane	13	8.125	0.374775	10894, 10267, 54741, 1146, 1441, 4179, 3691, 5364, 3351, 81669, 2760, 51283, 3105	127	521	6172	1.21263	1	0.86784	99.7642
GOTERM_CC_FAT	GO:0031226~intrinsic to plasma membrane	13	8.125	0.402961	10894, 10267, 54741, 1146, 1441, 4179, 3691, 5364, 3351, 81669, 2760, 51283, 3105	127	532	6172	1.18756	1	0.882877	99.8698
UP_SEQ_FEATURE	disulfide bond	21	13.125	0.468872	10894, 4681, 64714, 10267, 941, 1146, 1441, 4179, 5742, 3339, 6347, 3691, 9210, 3351, 81669, 3340, 50487, 2331, 2760, 3105, 5328	159	1031	8439	1.08107	1	1	99.9928
SP_PIR_KEYWORDS	disulfide bond	22	13.75	0.470883	10894, 4681, 64714, 10267, 941, 1146, 1441, 4179, 5742, 3339, 6347, 3691, 9210, 3351, 81669, 3340, 50487, 2331, 2760, 3105, 56913, 5328	160	1079	8445	1.07617	1	0.943292	99.9764
SP_PIR_KEYWORDS	glycoprotein	30	18.75	0.73954	64714, 10894, 941, 1146, 25797, 3339, 6347, 79901, 81669, 3340, 50487, 3156, 84925, 3105, 5328, 1441, 4179, 5742, 6711, 10491, 81539, 2778, 3691, 5364, 9210, 3351, 10090, 2331, 2760, 51283	160	1687	8445	0.938611	1	0.987273	100
UP_SEQ_FEATURE	glycosylation site:N-linked (GlcNAc...)	28	17.5	0.747743	64714, 10894, 941, 1146, 25797, 3339, 6347, 79901, 81669, 3340, 50487, 3156, 84925, 3105, 5328, 1441, 4179, 5742, 10491, 81539, 3691, 5364, 9210, 3351, 10090, 2331, 2760, 51283	159	1592	8439	0.933488	1	1	100
UP_SEQ_FEATURE	signal peptide	23	14.375	0.770011	10894, 4681, 64714, 10267, 941, 1441, 1146, 4179, 5742, 25797, 3339, 10491, 83440, 6347, 3691, 5364, 9210, 50487, 2331, 2760, 64847, 3105, 5328	159	1330	8439	0.917847	1	1	100
SP_PIR_KEYWORDS	signal	23	14.375	0.778954	10894, 4681, 64714, 10267, 941, 1441, 1146, 4179, 5742, 25797, 3339, 10491, 83440, 6347, 3691, 5364, 9210, 50487, 2331, 2760, 64847, 3105, 5328	160	1330	8445	0.912758	1	0.991602	100
GOTERM_CC_FAT	GO:0005576~extracellular region	15	9.375	0.81838	4681, 10267, 1441, 801, 3339, 10491, 83440, 6347, 2778, 5364, 9210, 50487, 2331, 7094, 5328	127	831	6172	0.877228	1	0.993613	100
SP_PIR_KEYWORDS	Secreted	11	6.875	0.847215	9210, 4681, 50487, 1441, 2331, 3339, 10491, 83440, 6347, 5364, 5328	160	690	8445	0.84144	1	0.995879	100
UP_SEQ_FEATURE	topological domain:Extracellular	14	8.75	0.855294	10894, 10267, 941, 1146, 1441, 4179, 81539, 3691, 5364, 3351, 81669, 11230, 57406, 3105	159	882	8439	0.842468	1	1	100
UP_SEQ_FEATURE	topological domain:Cytoplasmic	19	11.875	0.908915	10894, 10267, 941, 1441, 1146, 4179, 81539, 3691, 5364, 23345, 3351, 81669, 10090, 3340, 11230, 51283, 57406, 3105, 56913	159	1244	8439	0.810638	1	1	100
Annotation Cluster 44	Enrichment Score: 0.38981180276575156
Category	Term	Count	%	PValue	Genes	List Total	Pop Hits	Pop Total	Fold Enrichment	Bonferroni	Benjamini	FDR
INTERPRO	IPR001452:Src homology-3 domain	4	2.5	0.363684	10278, 152503, 8874, 7082	147	114	7752	1.85034	1	0.999994	99.8053
SP_PIR_KEYWORDS	sh3 domain	4	2.5	0.373768	10278, 152503, 8874, 7082	160	116	8445	1.82004	1	0.937125	99.7844
SMART	SM00326:SH3	4	2.5	0.383987	10278, 152503, 8874, 7082	81	114	4108	1.77951	1	0.998867	99.4486
UP_SEQ_FEATURE	domain:SH3	3	1.875	0.528578	10278, 8874, 7082	159	94	8439	1.6939	1	1	99.9988
Annotation Cluster 45	Enrichment Score: 0.38577473989631406
Category	Term	Count	%	PValue	Genes	List Total	Pop Hits	Pop Total	Fold Enrichment	Bonferroni	Benjamini	FDR
GOTERM_BP_FAT	GO:0019953~sexual reproduction	7	4.375	0.229561	9210, 4179, 3156, 5048, 10491, 64847, 4086	130	209	6549	1.68727	1	0.979939	98.5959
GOTERM_BP_FAT	GO:0007276~gamete generation	6	3.75	0.284856	9210, 3156, 5048, 10491, 64847, 4086	130	181	6549	1.66995	1	0.984577	99.5847
GOTERM_BP_FAT	GO:0032504~multicellular organism reproduction	7	4.375	0.356081	9210, 3156, 5048, 10491, 64847, 6347, 4086	130	246	6549	1.43349	1	0.9889	99.9253
GOTERM_BP_FAT	GO:0048609~reproductive process in a multicellular organism	7	4.375	0.356081	9210, 3156, 5048, 10491, 64847, 6347, 4086	130	246	6549	1.43349	1	0.9889	99.9253
GOTERM_BP_FAT	GO:0007283~spermatogenesis	3	1.875	0.764478	5048, 10491, 64847	130	139	6549	1.08727	1	0.99961	100
GOTERM_BP_FAT	GO:0048232~male gamete generation	3	1.875	0.764478	5048, 10491, 64847	130	139	6549	1.08727	1	0.99961	100
Annotation Cluster 46	Enrichment Score: 0.3841109428357957
Category	Term	Count	%	PValue	Genes	List Total	Pop Hits	Pop Total	Fold Enrichment	Bonferroni	Benjamini	FDR
UP_SEQ_FEATURE	lipid moiety-binding region:S-geranylgeranyl cysteine	3	1.875	0.310068	5899, 55970, 51762	159	60	8439	2.65377	1	1	99.6276
SP_PIR_KEYWORDS	methylation	5	3.125	0.321211	26003, 5899, 801, 55970, 51762	160	152	8445	1.73623	1	0.908987	99.3795
SP_PIR_KEYWORDS	lipoprotein	8	5	0.410173	3351, 2771, 4082, 26003, 5899, 55970, 51762, 2778	160	324	8445	1.30324	1	0.936295	99.9017
SP_PIR_KEYWORDS	prenylation	3	1.875	0.508236	5899, 55970, 51762	160	90	8445	1.75937	1	0.950051	99.991
UP_SEQ_FEATURE	propeptide:Removed in mature form	3	1.875	0.578316	5899, 55970, 51762	159	103	8439	1.54589	1	1	99.9998
Annotation Cluster 47	Enrichment Score: 0.37543232522110115
Category	Term	Count	%	PValue	Genes	List Total	Pop Hits	Pop Total	Fold Enrichment	Bonferroni	Benjamini	FDR
GOTERM_BP_FAT	GO:0048545~response to steroid hormone stimulus	5	3.125	0.301926	3351, 29966, 5742, 6347, 1499	130	141	6549	1.78642	1	0.984372	99.7203
GOTERM_BP_FAT	GO:0031960~response to corticosteroid stimulus	3	1.875	0.346175	3351, 5742, 6347	130	62	6549	2.43759	1	0.987882	99.9042
GOTERM_BP_FAT	GO:0044057~regulation of system process	4	2.5	0.715329	3351, 2771, 5742, 6347	130	186	6549	1.08337	1	0.999367	100
Annotation Cluster 48	Enrichment Score: 0.3640767330190402
Category	Term	Count	%	PValue	Genes	List Total	Pop Hits	Pop Total	Fold Enrichment	Bonferroni	Benjamini	FDR
GOTERM_BP_FAT	GO:0009611~response to wounding	9	5.625	0.19391	10894, 3340, 4179, 4088, 4628, 9060, 6347, 4086, 5328	130	283	6549	1.60209	1	0.97265	97.0574
GOTERM_BP_FAT	GO:0006954~inflammatory response	4	2.5	0.636249	3340, 4179, 6347, 4086	130	165	6549	1.22126	1	0.998554	100
GOTERM_BP_FAT	GO:0006952~defense response	6	3.75	0.655456	81669, 3340, 1441, 4179, 6347, 4086	130	281	6549	1.07566	1	0.998799	100
Annotation Cluster 49	Enrichment Score: 0.35727131308488175
Category	Term	Count	%	PValue	Genes	List Total	Pop Hits	Pop Total	Fold Enrichment	Bonferroni	Benjamini	FDR
GOTERM_BP_FAT	GO:0051130~positive regulation of cellular component organization	4	2.5	0.374523	57534, 4088, 5364, 4086	130	111	6549	1.81538	1	0.987977	99.9536
GOTERM_BP_FAT	GO:0060284~regulation of cell development	4	2.5	0.374523	57534, 4088, 5364, 4086	130	111	6549	1.81538	1	0.987977	99.9536
GOTERM_BP_FAT	GO:0045664~regulation of neuron differentiation	3	1.875	0.374754	57534, 5364, 4086	130	66	6549	2.28986	1	0.987637	99.9539
GOTERM_BP_FAT	GO:0050767~regulation of neurogenesis	3	1.875	0.508441	57534, 5364, 4086	130	86	6549	1.75733	1	0.995822	99.9991
GOTERM_BP_FAT	GO:0051960~regulation of nervous system development	3	1.875	0.611928	57534, 5364, 4086	130	104	6549	1.45318	1	0.998174	100
Annotation Cluster 50	Enrichment Score: 0.3413446970141063
Category	Term	Count	%	PValue	Genes	List Total	Pop Hits	Pop Total	Fold Enrichment	Bonferroni	Benjamini	FDR
GOTERM_BP_FAT	GO:0044092~negative regulation of molecular function	7	4.375	0.255756	9491, 2771, 801, 84335, 3156, 5195, 81848	130	217	6549	1.62506	1	0.984154	99.2026
GOTERM_BP_FAT	GO:0006469~negative regulation of protein kinase activity	3	1.875	0.287938	84335, 3156, 81848	130	54	6549	2.79872	1	0.984796	99.6131
GOTERM_BP_FAT	GO:0033673~negative regulation of kinase activity	3	1.875	0.3099	84335, 3156, 81848	130	57	6549	2.65142	1	0.985266	99.7682
GOTERM_BP_FAT	GO:0051348~negative regulation of transferase activity	3	1.875	0.317194	84335, 3156, 81848	130	58	6549	2.6057	1	0.985947	99.8052
GOTERM_BP_FAT	GO:0019220~regulation of phosphate metabolic process	8	5	0.375261	2771, 941, 84335, 3156, 4088, 81848, 9887, 116496	130	299	6549	1.34788	1	0.987344	99.9545
GOTERM_BP_FAT	GO:0051174~regulation of phosphorus metabolic process	8	5	0.375261	2771, 941, 84335, 3156, 4088, 81848, 9887, 116496	130	299	6549	1.34788	1	0.987344	99.9545
GOTERM_BP_FAT	GO:0043086~negative regulation of catalytic activity	5	3.125	0.471587	9491, 2771, 84335, 3156, 81848	130	179	6549	1.40718	1	0.994624	99.9971
GOTERM_BP_FAT	GO:0042325~regulation of phosphorylation	6	3.75	0.676822	2771, 941, 84335, 3156, 81848, 116496	130	288	6549	1.04952	1	0.999022	100
GOTERM_BP_FAT	GO:0045859~regulation of protein kinase activity	4	2.5	0.794199	2771, 84335, 3156, 81848	130	212	6549	0.950508	1	0.999777	100
GOTERM_BP_FAT	GO:0043549~regulation of kinase activity	4	2.5	0.816938	2771, 84335, 3156, 81848	130	221	6549	0.9118	1	0.999857	100
GOTERM_BP_FAT	GO:0051338~regulation of transferase activity	4	2.5	0.833133	2771, 84335, 3156, 81848	130	228	6549	0.883806	1	0.999908	100
Annotation Cluster 51	Enrichment Score: 0.3361090749202976
Category	Term	Count	%	PValue	Genes	List Total	Pop Hits	Pop Total	Fold Enrichment	Bonferroni	Benjamini	FDR
GOTERM_BP_FAT	GO:0006633~fatty acid biosynthetic process	3	1.875	0.243881	6307, 57140, 5742	130	48	6549	3.14856	1	0.98183	98.967
GOTERM_BP_FAT	GO:0008610~lipid biosynthetic process	6	3.75	0.36291	6307, 2222, 57140, 6713, 5742, 3156	130	201	6549	1.50379	1	0.988178	99.9373
GOTERM_BP_FAT	GO:0046394~carboxylic acid biosynthetic process	3	1.875	0.579355	6307, 57140, 5742	130	98	6549	1.54215	1	0.997702	99.9999
GOTERM_BP_FAT	GO:0016053~organic acid biosynthetic process	3	1.875	0.579355	6307, 57140, 5742	130	98	6549	1.54215	1	0.997702	99.9999
GOTERM_BP_FAT	GO:0006631~fatty acid metabolic process	3	1.875	0.702406	6307, 57140, 5742	130	123	6549	1.22871	1	0.99923	100
Annotation Cluster 52	Enrichment Score: 0.3276645454530748
Category	Term	Count	%	PValue	Genes	List Total	Pop Hits	Pop Total	Fold Enrichment	Bonferroni	Benjamini	FDR
SP_PIR_KEYWORDS	chromatin regulator	5	3.125	0.237312	151636, 11107, 2908, 23326, 10362	160	132	8445	1.99929	1	0.864894	97.138
GOTERM_BP_FAT	GO:0016568~chromatin modification	5	3.125	0.427651	11107, 2908, 23326, 10362, 6827	130	169	6549	1.49044	1	0.992359	99.9891
GOTERM_BP_FAT	GO:0006325~chromatin organization	5	3.125	0.613355	11107, 2908, 23326, 10362, 6827	130	214	6549	1.17703	1	0.998161	100
GOTERM_BP_FAT	GO:0051276~chromosome organization	5	3.125	0.785635	11107, 2908, 23326, 10362, 6827	130	270	6549	0.932906	1	0.999732	100
Annotation Cluster 53	Enrichment Score: 0.31312297871632794
Category	Term	Count	%	PValue	Genes	List Total	Pop Hits	Pop Total	Fold Enrichment	Bonferroni	Benjamini	FDR
GOTERM_BP_FAT	GO:0007160~cell-matrix adhesion	3	1.875	0.32447	10894, 3691, 1499	130	59	6549	2.56154	1	0.986101	99.8365
GOTERM_BP_FAT	GO:0031589~cell-substrate adhesion	3	1.875	0.381822	10894, 3691, 1499	130	67	6549	2.25568	1	0.987032	99.9617
GOTERM_BP_FAT	GO:0007155~cell adhesion	8	5	0.55477	10894, 10278, 8727, 1441, 3339, 6347, 3691, 1499	130	355	6549	1.13525	1	0.997161	99.9998
GOTERM_BP_FAT	GO:0022610~biological adhesion	8	5	0.557812	10894, 10278, 8727, 1441, 3339, 6347, 3691, 1499	130	356	6549	1.13207	1	0.99721	99.9998
SP_PIR_KEYWORDS	cell adhesion	4	2.5	0.709166	10278, 1441, 3691, 1499	160	193	8445	1.09391	1	0.983533	100
Annotation Cluster 54	Enrichment Score: 0.3079636891053756
Category	Term	Count	%	PValue	Genes	List Total	Pop Hits	Pop Total	Fold Enrichment	Bonferroni	Benjamini	FDR
INTERPRO	IPR013783:Immunoglobulin-like fold	6	3.75	0.244418	55770, 941, 10725, 3339, 2317, 3105	147	178	7752	1.77757	1	0.999971	97.9129
SP_PIR_KEYWORDS	Immunoglobulin domain	4	2.5	0.600728	941, 1441, 3339, 3105	160	164	8445	1.28735	1	0.967925	99.9994
INTERPRO	IPR007110:Immunoglobulin-like	3	1.875	0.811518	941, 3339, 3105	147	161	7752	0.982634	1	1	100
Annotation Cluster 55	Enrichment Score: 0.2875477843163755
Category	Term	Count	%	PValue	Genes	List Total	Pop Hits	Pop Total	Fold Enrichment	Bonferroni	Benjamini	FDR
GOTERM_BP_FAT	GO:0035023~regulation of Rho protein signal transduction	3	1.875	0.280599	115557, 8874, 5048	130	53	6549	2.85152	1	0.98586	99.5424
GOTERM_BP_FAT	GO:0046578~regulation of Ras protein signal transduction	3	1.875	0.642561	115557, 8874, 5048	130	110	6549	1.37392	1	0.998578	100
GOTERM_BP_FAT	GO:0051056~regulation of small GTPase mediated signal transduction	3	1.875	0.760951	115557, 8874, 5048	130	138	6549	1.09515	1	0.99959	100
Annotation Cluster 56	Enrichment Score: 0.265267701865947
Category	Term	Count	%	PValue	Genes	List Total	Pop Hits	Pop Total	Fold Enrichment	Bonferroni	Benjamini	FDR
GOTERM_MF_FAT	GO:0005539~glycosaminoglycan binding	3	1.875	0.476233	10894, 5048, 6347	123	81	6200	1.86691	1	0.997476	99.9846
GOTERM_MF_FAT	GO:0001871~pattern binding	3	1.875	0.514167	10894, 5048, 6347	123	87	6200	1.73816	1	0.998211	99.9945
GOTERM_MF_FAT	GO:0030247~polysaccharide binding	3	1.875	0.514167	10894, 5048, 6347	123	87	6200	1.73816	1	0.998211	99.9945
GOTERM_MF_FAT	GO:0030246~carbohydrate binding	4	2.5	0.690082	10894, 26270, 5048, 6347	123	179	6200	1.1264	1	0.999859	100
Annotation Cluster 57	Enrichment Score: 0.26343374268340763
Category	Term	Count	%	PValue	Genes	List Total	Pop Hits	Pop Total	Fold Enrichment	Bonferroni	Benjamini	FDR
SP_PIR_KEYWORDS	membrane	60	37.5	0.086077	10894, 941, 1146, 57534, 11194, 10540, 79901, 4928, 81669, 3340, 50487, 84925, 3156, 23075, 89795, 3105, 56913, 6645, 5742, 3691, 81848, 5364, 1593, 6307, 3351, 4082, 51479, 26003, 8727, 10090, 90196, 81855, 401152, 11230, 51762, 10267, 5048, 79064, 2222, 55970, 7082, 26056, 29966, 54741, 5899, 1441, 6713, 4179, 6711, 5195, 81539, 2778, 79109, 23345, 115557, 199964, 55823, 7094, 51283, 57406	160	2683	8445	1.18035	1	0.697937	69.2939
GOTERM_CC_FAT	GO:0031224~intrinsic to membrane	44	27.5	0.651277	10894, 10527, 10267, 941, 1146, 2317, 11194, 79064, 79901, 4928, 81669, 2222, 3340, 3156, 84925, 3105, 56913, 54741, 1441, 6713, 3839, 4179, 5195, 81539, 3691, 2778, 5364, 23345, 115557, 199964, 3351, 6307, 4082, 26003, 10090, 90196, 81855, 2760, 401152, 11230, 9961, 51283, 57406, 4086	127	2185	6172	0.978641	1	0.970298	99.9999
GOTERM_CC_FAT	GO:0016021~integral to membrane	41	25.625	0.74952	10894, 10527, 10267, 941, 1146, 2317, 11194, 79064, 79901, 4928, 81669, 2222, 3340, 3156, 84925, 3105, 56913, 54741, 1441, 6713, 4179, 3839, 5195, 81539, 3691, 5364, 23345, 115557, 199964, 3351, 6307, 10090, 90196, 81855, 2760, 401152, 11230, 9961, 51283, 57406, 4086	127	2110	6172	0.94433	1	0.9851	100
UP_SEQ_FEATURE	transmembrane region	33	20.625	0.818836	10894, 10267, 941, 1146, 11194, 79064, 79901, 81669, 2222, 3340, 3156, 84925, 3105, 56913, 54741, 1441, 6713, 4179, 81539, 3691, 5364, 23345, 115557, 199964, 3351, 6307, 10090, 90196, 81855, 11230, 401152, 51283, 57406	159	1938	8439	0.903762	1	1	100
SP_PIR_KEYWORDS	transmembrane	33	20.625	0.839925	10894, 10267, 941, 1146, 11194, 79064, 79901, 81669, 2222, 3340, 3156, 84925, 3105, 56913, 54741, 1441, 6713, 4179, 81539, 3691, 5364, 23345, 115557, 199964, 3351, 6307, 10090, 90196, 81855, 11230, 401152, 51283, 57406	160	1951	8445	0.892763	1	0.996308	100
UP_SEQ_FEATURE	topological domain:Cytoplasmic	19	11.875	0.908915	10894, 10267, 941, 1441, 1146, 4179, 81539, 3691, 5364, 23345, 3351, 81669, 10090, 3340, 11230, 51283, 57406, 3105, 56913	159	1244	8439	0.810638	1	1	100
Annotation Cluster 58	Enrichment Score: 0.2628139406838168
Category	Term	Count	%	PValue	Genes	List Total	Pop Hits	Pop Total	Fold Enrichment	Bonferroni	Benjamini	FDR
GOTERM_BP_FAT	GO:0030900~forebrain development	4	2.5	0.193371	3340, 4628, 5048, 1499	130	77	6549	2.61698	1	0.973586	97.0251
GOTERM_BP_FAT	GO:0008283~cell proliferation	6	3.75	0.600041	2771, 2782, 4628, 5048, 1499, 10540	130	264	6549	1.14493	1	0.998155	100
GOTERM_BP_FAT	GO:0000902~cell morphogenesis	4	2.5	0.718745	4628, 5048, 1874, 1499	130	187	6549	1.07758	1	0.999391	100
GOTERM_BP_FAT	GO:0000904~cell morphogenesis involved in differentiation	3	1.875	0.723126	4628, 5048, 1499	130	128	6549	1.18071	1	0.999425	100
GOTERM_BP_FAT	GO:0032989~cellular component morphogenesis	4	2.5	0.804579	4628, 5048, 1874, 1499	130	216	6549	0.932906	1	0.999818	100
Annotation Cluster 59	Enrichment Score: 0.2425464623843129
Category	Term	Count	%	PValue	Genes	List Total	Pop Hits	Pop Total	Fold Enrichment	Bonferroni	Benjamini	FDR
INTERPRO	IPR013032:EGF-like region, conserved site	4	2.5	0.517256	5742, 3339, 3691, 5328	147	145	7752	1.45475	1	0.999999	99.9957
INTERPRO	IPR000742:EGF-like, type 3	3	1.875	0.543305	5742, 3339, 5328	147	96	7752	1.64796	1	0.999998	99.998
INTERPRO	IPR006210:EGF-like	3	1.875	0.570977	5742, 3339, 5328	147	101	7752	1.56638	1	0.999999	99.9992
SMART	SM00181:EGF	3	1.875	0.590853	5742, 3339, 5328	81	101	4108	1.50642	1	0.998913	99.9932
SP_PIR_KEYWORDS	egf-like domain	3	1.875	0.64628	5742, 3339, 5328	160	116	8445	1.36503	1	0.977333	99.9999
Annotation Cluster 60	Enrichment Score: 0.21752547958756493
Category	Term	Count	%	PValue	Genes	List Total	Pop Hits	Pop Total	Fold Enrichment	Bonferroni	Benjamini	FDR
GOTERM_CC_FAT	GO:0005794~Golgi apparatus	13	8.125	0.449335	152503, 29966, 5742, 2778, 23345, 10090, 3340, 26003, 90196, 23760, 11345, 10749, 3105	127	550	6172	1.14869	1	0.901534	99.9541
GOTERM_CC_FAT	GO:0044431~Golgi apparatus part	5	3.125	0.599979	26003, 90196, 11345, 2778, 3105	127	203	6172	1.19701	1	0.960876	99.9993
SP_PIR_KEYWORDS	golgi apparatus	6	3.75	0.825501	3340, 26003, 10090, 90196, 23760, 11345	160	366	8445	0.865266	1	0.995483	100
Annotation Cluster 61	Enrichment Score: 0.2111434246166342
Category	Term	Count	%	PValue	Genes	List Total	Pop Hits	Pop Total	Fold Enrichment	Bonferroni	Benjamini	FDR
KEGG_PATHWAY	hsa04062:Chemokine signaling pathway	5	3.125	0.125239	2771, 81669, 2782, 55970, 6347	59	93	2795	2.54693	0.999997	0.956908	76.9574
GOTERM_BP_FAT	GO:0006874~cellular calcium ion homeostasis	3	1.875	0.520784	81669, 2782, 6347	130	88	6549	1.7174	1	0.996213	99.9994
GOTERM_BP_FAT	GO:0055074~calcium ion homeostasis	3	1.875	0.53891	81669, 2782, 6347	130	91	6549	1.66078	1	0.996774	99.9997
GOTERM_BP_FAT	GO:0006875~cellular metal ion homeostasis	3	1.875	0.573737	81669, 2782, 6347	130	97	6549	1.55805	1	0.997557	99.9999
GOTERM_BP_FAT	GO:0055065~metal ion homeostasis	3	1.875	0.601286	81669, 2782, 6347	130	102	6549	1.48167	1	0.998134	100
GOTERM_BP_FAT	GO:0019725~cellular homeostasis	6	3.75	0.61017	64714, 81669, 2782, 1146, 6347, 1874	130	267	6549	1.13207	1	0.998177	100
GOTERM_BP_FAT	GO:0030005~cellular di-, tri-valent inorganic cation homeostasis	3	1.875	0.675878	81669, 2782, 6347	130	117	6549	1.29172	1	0.999036	100
GOTERM_BP_FAT	GO:0055066~di-, tri-valent inorganic cation homeostasis	3	1.875	0.706649	81669, 2782, 6347	130	124	6549	1.2188	1	0.999269	100
GOTERM_BP_FAT	GO:0006873~cellular ion homeostasis	4	2.5	0.744944	81669, 2782, 1146, 6347	130	195	6549	1.03337	1	0.999517	100
GOTERM_BP_FAT	GO:0042592~homeostatic process	8	5	0.747892	64714, 81669, 2782, 1146, 6347, 1874, 4086, 1499	130	428	6549	0.941625	1	0.999533	100
GOTERM_BP_FAT	GO:0030003~cellular cation homeostasis	3	1.875	0.757378	81669, 2782, 6347	130	137	6549	1.10314	1	0.999583	100
GOTERM_BP_FAT	GO:0055082~cellular chemical homeostasis	4	2.5	0.76032	81669, 2782, 1146, 6347	130	200	6549	1.00754	1	0.999598	100
GOTERM_BP_FAT	GO:0050801~ion homeostasis	4	2.5	0.807105	81669, 2782, 1146, 6347	130	217	6549	0.928607	1	0.999824	100
GOTERM_BP_FAT	GO:0055080~cation homeostasis	3	1.875	0.81223	81669, 2782, 6347	130	154	6549	0.981369	1	0.999842	100
GOTERM_BP_FAT	GO:0048878~chemical homeostasis	4	2.5	0.915668	81669, 2782, 1146, 6347	130	277	6549	0.727465	1	0.999995	100
Annotation Cluster 62	Enrichment Score: 0.21090069412822224
Category	Term	Count	%	PValue	Genes	List Total	Pop Hits	Pop Total	Fold Enrichment	Bonferroni	Benjamini	FDR
SP_PIR_KEYWORDS	guanine-nucleotide releasing factor	3	1.875	0.360694	115557, 8874, 5866	160	67	8445	2.36334	1	0.9331	99.7173
GOTERM_MF_FAT	GO:0005085~guanyl-nucleotide exchange factor activity	3	1.875	0.482679	115557, 8874, 5866	123	82	6200	1.84414	1	0.997346	99.987
GOTERM_MF_FAT	GO:0005083~small GTPase regulator activity	3	1.875	0.781157	115557, 10527, 8874	123	144	6200	1.05014	1	0.999967	100
GOTERM_MF_FAT	GO:0030695~GTPase regulator activity	4	2.5	0.796535	115557, 10527, 8874, 5866	123	213	6200	0.946601	1	0.999963	100
GOTERM_MF_FAT	GO:0060589~nucleoside-triphosphatase regulator activity	4	2.5	0.814249	115557, 10527, 8874, 5866	123	220	6200	0.916482	1	0.999974	100
Annotation Cluster 63	Enrichment Score: 0.20514722178935602
Category	Term	Count	%	PValue	Genes	List Total	Pop Hits	Pop Total	Fold Enrichment	Bonferroni	Benjamini	FDR
INTERPRO	IPR015880:Zinc finger, C2H2-like	5	3.125	0.52323	11107, 253461, 64397, 134218, 10906	147	200	7752	1.31837	1	0.999999	99.9964
SMART	SM00355:ZnF_C2H2	5	3.125	0.551914	11107, 253461, 64397, 134218, 10906	81	200	4108	1.2679	1	0.998821	99.9819
INTERPRO	IPR007087:Zinc finger, C2H2-type	4	2.5	0.719504	11107, 253461, 64397, 134218	147	196	7752	1.07622	1	1	100
UP_SEQ_FEATURE	zinc finger region:C2H2-type 1	3	1.875	0.727468	11107, 253461, 134218	159	136	8439	1.17078	1	1	100
Annotation Cluster 64	Enrichment Score: 0.2017013350600347
Category	Term	Count	%	PValue	Genes	List Total	Pop Hits	Pop Total	Fold Enrichment	Bonferroni	Benjamini	FDR
GOTERM_BP_FAT	GO:0032270~positive regulation of cellular protein metabolic process	5	3.125	0.387387	9491, 152503, 941, 23034, 116496	130	160	6549	1.57428	1	0.987684	99.967
GOTERM_BP_FAT	GO:0051247~positive regulation of protein metabolic process	5	3.125	0.427651	9491, 152503, 941, 23034, 116496	130	169	6549	1.49044	1	0.992359	99.9891
GOTERM_BP_FAT	GO:0031401~positive regulation of protein modification process	3	1.875	0.73497	9491, 941, 116496	130	131	6549	1.15367	1	0.999491	100
GOTERM_BP_FAT	GO:0032268~regulation of cellular protein metabolic process	5	3.125	0.884039	9491, 152503, 941, 23034, 116496	130	321	6549	0.784687	1	0.999981	100
GOTERM_BP_FAT	GO:0031399~regulation of protein modification process	3	1.875	0.910999	9491, 941, 116496	130	201	6549	0.751894	1	0.999993	100
Annotation Cluster 65	Enrichment Score: 0.1939325797475908
Category	Term	Count	%	PValue	Genes	List Total	Pop Hits	Pop Total	Fold Enrichment	Bonferroni	Benjamini	FDR
GOTERM_BP_FAT	GO:0001525~angiogenesis	3	1.875	0.562341	56913, 1499, 5328	130	95	6549	1.59085	1	0.997324	99.9999
GOTERM_BP_FAT	GO:0001568~blood vessel development	4	2.5	0.619592	57534, 56913, 1499, 5328	130	161	6549	1.2516	1	0.99824	100
GOTERM_BP_FAT	GO:0001944~vasculature development	4	2.5	0.632132	57534, 56913, 1499, 5328	130	164	6549	1.22871	1	0.998493	100
GOTERM_BP_FAT	GO:0048514~blood vessel morphogenesis	3	1.875	0.760951	56913, 1499, 5328	130	138	6549	1.09515	1	0.99959	100
Annotation Cluster 66	Enrichment Score: 0.18654861169520873
Category	Term	Count	%	PValue	Genes	List Total	Pop Hits	Pop Total	Fold Enrichment	Bonferroni	Benjamini	FDR
GOTERM_BP_FAT	GO:0030030~cell projection organization	6	3.75	0.36291	832, 4628, 5048, 3691, 1874, 51474	130	201	6549	1.50379	1	0.988178	99.9373
GOTERM_BP_FAT	GO:0000902~cell morphogenesis	4	2.5	0.718745	4628, 5048, 1874, 1499	130	187	6549	1.07758	1	0.999391	100
GOTERM_BP_FAT	GO:0048858~cell projection morphogenesis	3	1.875	0.73107	4628, 5048, 1874	130	130	6549	1.16254	1	0.999464	100
GOTERM_BP_FAT	GO:0032990~cell part morphogenesis	3	1.875	0.760951	4628, 5048, 1874	130	138	6549	1.09515	1	0.99959	100
GOTERM_BP_FAT	GO:0032989~cellular component morphogenesis	4	2.5	0.804579	4628, 5048, 1874, 1499	130	216	6549	0.932906	1	0.999818	100
Annotation Cluster 67	Enrichment Score: 0.1851752444174371
Category	Term	Count	%	PValue	Genes	List Total	Pop Hits	Pop Total	Fold Enrichment	Bonferroni	Benjamini	FDR
SP_PIR_KEYWORDS	oxidoreductase	8	5	0.462827	3712, 1593, 6307, 2222, 6713, 5742, 3156, 79901	160	341	8445	1.23827	1	0.947755	99.9712
GOTERM_MF_FAT	GO:0050662~coenzyme binding	3	1.875	0.710473	3712, 6713, 3156	123	125	6200	1.20976	1	0.999896	100
GOTERM_MF_FAT	GO:0048037~cofactor binding	3	1.875	0.846268	3712, 6713, 3156	123	167	6200	0.905506	1	0.999985	100
Annotation Cluster 68	Enrichment Score: 0.16655122066078876
Category	Term	Count	%	PValue	Genes	List Total	Pop Hits	Pop Total	Fold Enrichment	Bonferroni	Benjamini	FDR
SP_PIR_KEYWORDS	ubl conjugation pathway	7	4.375	0.462974	26270, 151636, 63893, 57534, 23326, 7317, 80700	160	289	8445	1.27844	1	0.945048	99.9713
GOTERM_MF_FAT	GO:0004842~ubiquitin-protein ligase activity	3	1.875	0.544382	26270, 63893, 57534	123	92	6200	1.64369	1	0.998562	99.9977
GOTERM_BP_FAT	GO:0006508~proteolysis	12	7.5	0.589393	9520, 9491, 26270, 57140, 4179, 63893, 57534, 25797, 23326, 7317, 80700, 5328	130	576	6549	1.04952	1	0.997995	100
GOTERM_MF_FAT	GO:0019787~small conjugating protein ligase activity	3	1.875	0.616731	26270, 63893, 57534	123	105	6200	1.44019	1	0.999405	99.9998
GOTERM_BP_FAT	GO:0043632~modification-dependent macromolecule catabolic process	7	4.375	0.681415	9491, 26270, 63893, 57534, 23326, 7317, 80700	130	345	6549	1.02214	1	0.999074	100
GOTERM_BP_FAT	GO:0019941~modification-dependent protein catabolic process	7	4.375	0.681415	9491, 26270, 63893, 57534, 23326, 7317, 80700	130	345	6549	1.02214	1	0.999074	100
SP_PIR_KEYWORDS	ligase	4	2.5	0.705833	151636, 63893, 57534, 7317	160	192	8445	1.09961	1	0.983755	100
GOTERM_MF_FAT	GO:0016881~acid-amino acid ligase activity	3	1.875	0.718719	26270, 63893, 57534	123	127	6200	1.1907	1	0.999897	100
GOTERM_BP_FAT	GO:0009057~macromolecule catabolic process	9	5.625	0.72385	10894, 9491, 26270, 63893, 57534, 23326, 7317, 9887, 80700	130	473	6549	0.958546	1	0.999415	100
GOTERM_BP_FAT	GO:0044257~cellular protein catabolic process	7	4.375	0.728158	9491, 26270, 63893, 57534, 23326, 7317, 80700	130	363	6549	0.971456	1	0.999448	100
GOTERM_BP_FAT	GO:0051603~proteolysis involved in cellular protein catabolic process	7	4.375	0.728158	9491, 26270, 63893, 57534, 23326, 7317, 80700	130	363	6549	0.971456	1	0.999448	100
GOTERM_BP_FAT	GO:0030163~protein catabolic process	7	4.375	0.74968	9491, 26270, 63893, 57534, 23326, 7317, 80700	130	372	6549	0.947953	1	0.999536	100
GOTERM_BP_FAT	GO:0044265~cellular macromolecule catabolic process	8	5	0.775253	9491, 26270, 63893, 57534, 23326, 7317, 9887, 80700	130	441	6549	0.913867	1	0.999677	100
GOTERM_MF_FAT	GO:0016879~ligase activity, forming carbon-nitrogen bonds	3	1.875	0.790835	26270, 63893, 57534	123	147	6200	1.0287	1	0.999963	100
GOTERM_BP_FAT	GO:0006511~ubiquitin-dependent protein catabolic process	3	1.875	0.834029	9491, 26270, 23326	130	162	6549	0.932906	1	0.999908	100
Annotation Cluster 69	Enrichment Score: 0.14978318833694604
Category	Term	Count	%	PValue	Genes	List Total	Pop Hits	Pop Total	Fold Enrichment	Bonferroni	Benjamini	FDR
GOTERM_MF_FAT	GO:0000287~magnesium ion binding	6	3.75	0.528315	64121, 11329, 2222, 3628, 83440, 56913	123	244	6200	1.2395	1	0.998365	99.9963
SP_PIR_KEYWORDS	magnesium	5	3.125	0.679587	11329, 2222, 3628, 83440, 56913	160	244	8445	1.08158	1	0.982343	100
SP_PIR_KEYWORDS	transferase	8	5	0.98972	11329, 2222, 3340, 10090, 25797, 83440, 9060, 56913	160	747	8445	0.565261	1	0.999993	100
Annotation Cluster 70	Enrichment Score: 0.11809560243610566
Category	Term	Count	%	PValue	Genes	List Total	Pop Hits	Pop Total	Fold Enrichment	Bonferroni	Benjamini	FDR
SP_PIR_KEYWORDS	motor protein	4	2.5	0.127585	9493, 4628, 10749, 9371	160	66	8445	3.19886	1	0.752513	83.3112
GOTERM_MF_FAT	GO:0000166~nucleotide binding	23	14.375	0.735008	3712, 64121, 5899, 6713, 57674, 7317, 9060, 2778, 11194, 9371, 2771, 11329, 55823, 9493, 63893, 3156, 4628, 51762, 23075, 10749, 7084, 85437, 89795	123	1235	6200	0.938745	1	0.9999	100
UP_SEQ_FEATURE	nucleotide phosphate-binding region:ATP	8	5	0.830311	11329, 9493, 4628, 7317, 10749, 9060, 11194, 9371	159	497	8439	0.854334	1	1	100
GOTERM_MF_FAT	GO:0017076~purine nucleotide binding	18	11.25	0.833844	3712, 64121, 5899, 6713, 7317, 9060, 2778, 11194, 9371, 2771, 11329, 9493, 63893, 4628, 51762, 23075, 10749, 7084	123	1040	6200	0.87242	1	0.999981	100
SP_PIR_KEYWORDS	nucleotide-binding	15	9.375	0.843812	64121, 5899, 7317, 9060, 2778, 11194, 9371, 2771, 11329, 55823, 9493, 63893, 4628, 51762, 10749	160	926	8445	0.854988	1	0.995862	100
GOTERM_MF_FAT	GO:0001883~purine nucleoside binding	14	8.75	0.890553	64121, 3712, 6713, 7317, 9060, 11194, 9371, 11329, 9493, 63893, 4628, 23075, 10749, 7084	123	869	6200	0.812073	1	0.999997	100
GOTERM_MF_FAT	GO:0032555~purine ribonucleotide binding	16	10	0.893867	64121, 5899, 7317, 9060, 2778, 11194, 9371, 2771, 11329, 9493, 63893, 4628, 51762, 23075, 10749, 7084	123	987	6200	0.817127	1	0.999995	100
GOTERM_MF_FAT	GO:0032553~ribonucleotide binding	16	10	0.893867	64121, 5899, 7317, 9060, 2778, 11194, 9371, 2771, 11329, 9493, 63893, 4628, 51762, 23075, 10749, 7084	123	987	6200	0.817127	1	0.999995	100
GOTERM_MF_FAT	GO:0001882~nucleoside binding	14	8.75	0.895144	64121, 3712, 6713, 7317, 9060, 11194, 9371, 11329, 9493, 63893, 4628, 23075, 10749, 7084	123	874	6200	0.807427	1	0.999995	100
GOTERM_MF_FAT	GO:0030554~adenyl nucleotide binding	13	8.125	0.928524	3712, 6713, 7317, 9060, 11194, 9371, 11329, 9493, 63893, 23075, 4628, 10749, 7084	123	858	6200	0.763735	1	0.999998	100
GOTERM_MF_FAT	GO:0005524~ATP binding	11	6.875	0.961319	11329, 9493, 63893, 4628, 7317, 23075, 10749, 9060, 7084, 11194, 9371	123	797	6200	0.695698	1	1	100
GOTERM_MF_FAT	GO:0032559~adenyl ribonucleotide binding	11	6.875	0.964966	11329, 9493, 63893, 4628, 7317, 23075, 10749, 9060, 7084, 11194, 9371	123	806	6200	0.68793	1	1	100
SP_PIR_KEYWORDS	atp-binding	9	5.625	0.970113	11329, 9493, 63893, 4628, 7317, 10749, 9060, 11194, 9371	160	729	8445	0.65162	1	0.999912	100
Annotation Cluster 71	Enrichment Score: 0.09863300386137021
Category	Term	Count	%	PValue	Genes	List Total	Pop Hits	Pop Total	Fold Enrichment	Bonferroni	Benjamini	FDR
GOTERM_BP_FAT	GO:0006916~anti-apoptosis	4	2.5	0.524159	84335, 51283, 6347, 2739	130	140	6549	1.43934	1	0.996293	99.9995
GOTERM_BP_FAT	GO:0043066~negative regulation of apoptosis	5	3.125	0.683142	84335, 4088, 51283, 6347, 2739	130	234	6549	1.07643	1	0.999075	100
GOTERM_BP_FAT	GO:0043069~negative regulation of programmed cell death	5	3.125	0.689619	84335, 4088, 51283, 6347, 2739	130	236	6549	1.06731	1	0.99913	100
GOTERM_BP_FAT	GO:0060548~negative regulation of cell death	5	3.125	0.692823	84335, 4088, 51283, 6347, 2739	130	237	6549	1.0628	1	0.999155	100
GOTERM_BP_FAT	GO:0042981~regulation of apoptosis	8	5	0.863208	2908, 84335, 8874, 4088, 51283, 158471, 6347, 2739	130	493	6549	0.817475	1	0.99996	100
GOTERM_BP_FAT	GO:0043067~regulation of programmed cell death	8	5	0.867298	2908, 84335, 8874, 4088, 51283, 158471, 6347, 2739	130	496	6549	0.812531	1	0.999964	100
GOTERM_BP_FAT	GO:0010941~regulation of cell death	8	5	0.87129	2908, 84335, 8874, 4088, 51283, 158471, 6347, 2739	130	499	6549	0.807646	1	0.999968	100
GOTERM_BP_FAT	GO:0043065~positive regulation of apoptosis	4	2.5	0.896932	2908, 8874, 4088, 158471	130	263	6549	0.766189	1	0.999989	100
GOTERM_BP_FAT	GO:0006917~induction of apoptosis	3	1.875	0.896937	8874, 4088, 158471	130	192	6549	0.787139	1	0.999988	100
GOTERM_BP_FAT	GO:0012502~induction of programmed cell death	3	1.875	0.898595	8874, 4088, 158471	130	193	6549	0.783061	1	0.999989	100
GOTERM_BP_FAT	GO:0043068~positive regulation of programmed cell death	4	2.5	0.899818	2908, 8874, 4088, 158471	130	265	6549	0.760406	1	0.999989	100
GOTERM_BP_FAT	GO:0010942~positive regulation of cell death	4	2.5	0.902632	2908, 8874, 4088, 158471	130	267	6549	0.75471	1	0.99999	100
Annotation Cluster 72	Enrichment Score: 0.09252652850677148
Category	Term	Count	%	PValue	Genes	List Total	Pop Hits	Pop Total	Fold Enrichment	Bonferroni	Benjamini	FDR
UP_SEQ_FEATURE	cross-link:Glycyl lysine isopeptide (Lys-Gly) (interchain with G-Cter in ubiquitin)	3	1.875	0.679152	801, 2908, 2778	159	124	8439	1.28408	1	1	100
SP_PIR_KEYWORDS	ubl conjugation	6	3.75	0.854045	801, 2908, 57534, 2778, 3105, 1499	160	383	8445	0.82686	1	0.996167	100
SP_PIR_KEYWORDS	isopeptide bond	3	1.875	0.909856	801, 2908, 2778	160	210	8445	0.754018	1	0.998729	100
Annotation Cluster 73	Enrichment Score: 0.08936986228167192
Category	Term	Count	%	PValue	Genes	List Total	Pop Hits	Pop Total	Fold Enrichment	Bonferroni	Benjamini	FDR
GOTERM_BP_FAT	GO:0008219~cell death	8	5	0.736776	64121, 64714, 4088, 7317, 51283, 158471, 23345, 1499	130	423	6549	0.952755	1	0.999494	100
GOTERM_BP_FAT	GO:0016265~death	8	5	0.741262	64121, 64714, 4088, 7317, 51283, 158471, 23345, 1499	130	425	6549	0.948271	1	0.99951	100
GOTERM_BP_FAT	GO:0006915~apoptosis	6	3.75	0.843672	64121, 64714, 4088, 51283, 158471, 1499	130	359	6549	0.841954	1	0.999927	100
GOTERM_BP_FAT	GO:0012501~programmed cell death	6	3.75	0.853831	64121, 64714, 4088, 51283, 158471, 1499	130	365	6549	0.828114	1	0.999946	100
SP_PIR_KEYWORDS	Apoptosis	3	1.875	0.908443	51283, 158471, 1499	160	209	8445	0.757626	1	0.998762	100
Annotation Cluster 74	Enrichment Score: 0.07627518752200273
Category	Term	Count	%	PValue	Genes	List Total	Pop Hits	Pop Total	Fold Enrichment	Bonferroni	Benjamini	FDR
GOTERM_BP_FAT	GO:0007268~synaptic transmission	3	1.875	0.764478	3351, 5048, 1499	130	139	6549	1.08727	1	0.99961	100
GOTERM_BP_FAT	GO:0019226~transmission of nerve impulse	3	1.875	0.839113	3351, 5048, 1499	130	164	6549	0.921529	1	0.999918	100
GOTERM_BP_FAT	GO:0007267~cell-cell signaling	4	2.5	0.920426	3351, 941, 5048, 1499	130	281	6549	0.717109	1	0.999996	100
Annotation Cluster 75	Enrichment Score: 0.06065166123206435
Category	Term	Count	%	PValue	Genes	List Total	Pop Hits	Pop Total	Fold Enrichment	Bonferroni	Benjamini	FDR
SP_PIR_KEYWORDS	extracellular matrix	3	1.875	0.748514	2331, 3339, 10491	160	141	8445	1.12301	1	0.988012	100
GOTERM_CC_FAT	GO:0005578~proteinaceous extracellular matrix	3	1.875	0.88574	2331, 3339, 10491	127	179	6172	0.814499	1	0.998107	100
GOTERM_CC_FAT	GO:0031012~extracellular matrix	3	1.875	0.912748	2331, 3339, 10491	127	195	6172	0.747668	1	0.998973	100
GOTERM_CC_FAT	GO:0044421~extracellular region part	7	4.375	0.945228	9210, 10267, 50487, 2331, 3339, 10491, 6347	127	494	6172	0.688642	1	0.999599	100
Annotation Cluster 76	Enrichment Score: 0.051662057093349964
Category	Term	Count	%	PValue	Genes	List Total	Pop Hits	Pop Total	Fold Enrichment	Bonferroni	Benjamini	FDR
GOTERM_MF_FAT	GO:0008233~peptidase activity	5	3.125	0.821698	9520, 57140, 25797, 23326, 5328	123	286	6200	0.881233	1	0.999976	100
SP_PIR_KEYWORDS	Protease	4	2.5	0.843348	9520, 57140, 23326, 5328	160	244	8445	0.865266	1	0.996075	100
GOTERM_MF_FAT	GO:0070011~peptidase activity, acting on L-amino acid peptides	4	2.5	0.90795	9520, 57140, 23326, 5328	123	271	6200	0.744007	1	0.999996	100
SP_PIR_KEYWORDS	hydrolase	9	5.625	0.987577	9520, 3340, 3628, 57140, 50487, 23326, 63874, 57406, 5328	160	804	8445	0.590835	1	0.99999	100
Annotation Cluster 77	Enrichment Score: 0.048998548461898064
Category	Term	Count	%	PValue	Genes	List Total	Pop Hits	Pop Total	Fold Enrichment	Bonferroni	Benjamini	FDR
GOTERM_CC_FAT	GO:0031980~mitochondrial lumen	3	1.875	0.871663	3712, 1593, 2908	127	172	6172	0.847647	1	0.997539	100
GOTERM_CC_FAT	GO:0005759~mitochondrial matrix	3	1.875	0.871663	3712, 1593, 2908	127	172	6172	0.847647	1	0.997539	100
GOTERM_CC_FAT	GO:0044429~mitochondrial part	6	3.75	0.938225	3712, 1593, 26056, 2908, 7084, 11194	127	421	6172	0.692614	1	0.999535	100
Annotation Cluster 78	Enrichment Score: 0.046476677470506454
Category	Term	Count	%	PValue	Genes	List Total	Pop Hits	Pop Total	Fold Enrichment	Bonferroni	Benjamini	FDR
GOTERM_BP_FAT	GO:0007243~protein kinase cascade	5	3.125	0.609632	2771, 11329, 3340, 6347, 4086	130	213	6549	1.18256	1	0.998218	100
GOTERM_BP_FAT	GO:0006468~protein amino acid phosphorylation	4	2.5	0.975038	2771, 11329, 6711, 6347	130	357	6549	0.564447	1	1	100
GOTERM_BP_FAT	GO:0016310~phosphorylation	4	2.5	0.994437	2771, 11329, 6711, 6347	130	448	6549	0.449794	1	1	100
GOTERM_BP_FAT	GO:0006796~phosphate metabolic process	5	3.125	0.995348	2771, 11329, 3628, 6711, 6347	130	541	6549	0.465591	1	1	100
GOTERM_BP_FAT	GO:0006793~phosphorus metabolic process	5	3.125	0.995348	2771, 11329, 3628, 6711, 6347	130	541	6549	0.465591	1	1	100
Annotation Cluster 79	Enrichment Score: 0.045609056562125536
Category	Term	Count	%	PValue	Genes	List Total	Pop Hits	Pop Total	Fold Enrichment	Bonferroni	Benjamini	FDR
GOTERM_CC_FAT	GO:0019866~organelle inner membrane	5	3.125	0.71031	1593, 4088, 7084, 11194, 4086	127	234	6172	1.03843	1	0.979007	100
UP_SEQ_FEATURE	transit peptide:Mitochondrion	5	3.125	0.865374	3712, 1593, 27247, 11194, 64756	159	326	8439	0.814041	1	1	100
SP_PIR_KEYWORDS	transit peptide	5	3.125	0.878712	3712, 1593, 27247, 11194, 64756	160	333	8445	0.792511	1	0.997604	100
GOTERM_CC_FAT	GO:0031966~mitochondrial membrane	4	2.5	0.930629	1593, 26056, 7084, 11194	127	280	6172	0.694263	1	0.999413	100
GOTERM_CC_FAT	GO:0044429~mitochondrial part	6	3.75	0.938225	3712, 1593, 26056, 2908, 7084, 11194	127	421	6172	0.692614	1	0.999535	100
GOTERM_CC_FAT	GO:0005743~mitochondrial inner membrane	3	1.875	0.943337	1593, 7084, 11194	127	220	6172	0.662706	1	0.999598	100
GOTERM_CC_FAT	GO:0005740~mitochondrial envelope	4	2.5	0.947506	1593, 26056, 7084, 11194	127	298	6172	0.652328	1	0.999609	100
SP_PIR_KEYWORDS	mitochondrion	7	4.375	0.953329	3712, 1593, 26056, 27247, 81855, 11194, 64756	160	552	8445	0.669327	1	0.999735	100
GOTERM_CC_FAT	GO:0005739~mitochondrion	10	6.25	0.967041	3712, 1593, 26056, 27247, 81855, 2908, 2760, 7084, 11194, 64756	127	722	6172	0.673108	1	0.999862	100

## Sheet: Functional cluster 6
Annotation Cluster 1	Enrichment Score: 15.008171324251823
Category	Term	Count	%	PValue	Genes	List Total	Pop Hits	Pop Total	Fold Enrichment	Bonferroni	Benjamini	FDR
GOTERM_BP_FAT	GO:0006414~translational elongation	27	19.0141	1.17108e-25	6146, 6122, 6160, 6142, 1938, 6125, 6161, 1915, 6167, 6209, 6187, 9045, 6210, 6139, 6173, 6137, 6171, 6170, 23521, 6133, 6218, 6154, 6230, 6152, 6227, 6224, 6129	121	86	6549	16.9924	9.70822e-23	9.70822e-23	1.80601e-22
SP_PIR_KEYWORDS	ribonucleoprotein	33	23.2394	1.51844e-22	6146, 6122, 6160, 6142, 6125, 6161, 51373, 6167, 6209, 6187, 9045, 6210, 220988, 58517, 6139, 6173, 10412, 6137, 6171, 6170, 23521, 6133, 26523, 6154, 6218, 10492, 6152, 6230, 6227, 3182, 6224, 3181, 6129	141	210	8445	9.41185	3.23427e-20	3.23427e-20	1.92282e-19
KEGG_PATHWAY	hsa03010:Ribosome	25	17.6056	3.24269e-22	6146, 6122, 6160, 6142, 6125, 6161, 6209, 6167, 6187, 9045, 6210, 6139, 6173, 6137, 6171, 6170, 23521, 6133, 6218, 6154, 6230, 6152, 6227, 6224, 6129	69	76	2795	13.3248	1.88076e-20	1.88076e-20	3.22626e-19
SP_PIR_KEYWORDS	protein biosynthesis	28	19.7183	5.8651e-21	6146, 6122, 6160, 6142, 1938, 6125, 6161, 57176, 1915, 6167, 6209, 6187, 10480, 6210, 1974, 6139, 6137, 23521, 6133, 3735, 6154, 6218, 6230, 6152, 6227, 6224, 6129, 3646	141	151	8445	11.1061	1.24927e-18	6.24634e-19	7.42706e-18
SP_PIR_KEYWORDS	ribosome	21	14.7887	1.26857e-20	6146, 6137, 6122, 6160, 23521, 6133, 6142, 6125, 6161, 6218, 6154, 6152, 6230, 6167, 6209, 6187, 6210, 6227, 6224, 6139, 6129	141	66	8445	19.0571	2.70206e-18	9.00686e-19	1.60641e-17
GOTERM_BP_FAT	GO:0006412~translation	33	23.2394	1.57667e-19	6146, 6122, 6160, 6142, 1938, 6125, 6161, 57176, 51373, 1915, 6167, 6209, 10480, 6187, 9045, 6210, 1974, 6139, 6173, 6137, 6171, 6170, 23521, 6133, 3735, 6154, 6218, 6152, 6230, 6227, 6224, 6129, 3646	121	243	6549	7.35017	1.30706e-16	6.53531e-17	2.43152e-16
SP_PIR_KEYWORDS	ribosomal protein	26	18.3099	2.3599e-19	6146, 6122, 6160, 6142, 6125, 6161, 51373, 6167, 6209, 6187, 9045, 6210, 6139, 6173, 6137, 6171, 6170, 23521, 6133, 6218, 6154, 6230, 6152, 6227, 6224, 6129	141	141	8445	11.0442	5.0266e-17	1.25665e-17	2.98838e-16
GOTERM_CC_FAT	GO:0022626~cytosolic ribosome	21	14.7887	2.80178e-19	6146, 6137, 6171, 6170, 6122, 6160, 6142, 6125, 6161, 6218, 6154, 6152, 6230, 6167, 6209, 6187, 9045, 6210, 6227, 6224, 6129	115	70	6172	16.1009	5.32339e-17	5.32339e-17	3.48224e-16
GOTERM_MF_FAT	GO:0003735~structural constituent of ribosome	25	17.6056	1.51105e-18	6146, 6122, 6160, 6142, 6125, 6161, 51373, 6209, 6167, 6187, 9045, 6210, 6139, 6173, 6137, 6171, 6170, 23521, 6133, 6218, 6154, 6152, 6227, 6224, 6129	115	126	6200	10.697	3.8985e-16	3.8985e-16	1.97272e-15
GOTERM_CC_FAT	GO:0033279~ribosomal subunit	23	16.1972	3.07556e-18	6146, 6171, 6170, 6122, 6160, 23521, 6142, 6125, 6161, 51373, 6218, 6154, 6152, 6230, 6167, 6209, 6187, 9045, 6210, 6227, 6224, 6139, 6129	115	102	6172	12.102	5.84357e-16	2.92178e-16	3.8225e-15
GOTERM_CC_FAT	GO:0005840~ribosome	26	18.3099	5.05148e-17	6146, 6122, 6160, 6142, 6125, 6161, 51373, 6167, 6209, 6187, 9045, 6210, 6139, 6173, 6137, 6171, 6170, 23521, 6133, 6218, 6154, 6230, 6152, 6227, 6224, 6129	115	161	6172	8.66713	9.59782e-15	3.19927e-15	6.2783e-14
GOTERM_CC_FAT	GO:0030529~ribonucleoprotein complex	34	23.9437	5.78936e-15	6146, 6122, 6160, 6142, 1938, 6125, 6161, 51373, 6167, 6209, 6187, 9045, 6210, 220988, 58517, 6139, 6173, 10412, 6137, 6171, 6170, 23521, 6133, 26523, 6154, 6218, 10492, 6152, 6230, 6227, 3182, 6224, 3181, 6129	115	368	6172	4.9586	1.0969e-12	2.74225e-13	7.17204e-12
GOTERM_CC_FAT	GO:0022625~cytosolic large ribosomal subunit	13	9.15493	9.21002e-14	6146, 6171, 6122, 6170, 6160, 6142, 6125, 6161, 6154, 6152, 6167, 9045, 6129	115	31	6172	22.5066	1.75082e-11	3.50164e-12	1.14531e-10
GOTERM_CC_FAT	GO:0044445~cytosolic part	20	14.0845	1.01361e-13	6146, 6171, 6170, 6122, 6160, 6142, 6125, 6161, 6218, 6154, 6152, 6230, 6167, 6209, 6187, 9045, 6227, 6210, 6224, 6129	115	113	6172	9.49904	1.9259e-11	3.20988e-12	1.25977e-10
GOTERM_CC_FAT	GO:0015934~large ribosomal subunit	15	10.5634	2.3509e-13	6146, 6171, 6122, 6170, 6160, 6142, 23521, 6125, 6161, 6154, 6152, 6167, 9045, 6139, 6129	115	52	6172	15.4816	4.46776e-11	6.38256e-12	2.92255e-10
GOTERM_MF_FAT	GO:0003723~RNA binding	32	22.5352	5.20448e-11	6146, 6122, 6160, 6142, 6125, 51373, 6167, 6187, 9045, 84324, 6210, 6830, 1974, 220988, 58517, 6173, 677, 6137, 6171, 6170, 6133, 26135, 26523, 6154, 10492, 6152, 6230, 3182, 6224, 56902, 3181, 6129	115	451	6200	3.82532	1.34276e-08	6.71378e-09	6.79461e-08
GOTERM_MF_FAT	GO:0005198~structural molecule activity	27	19.0141	1.47933e-09	6146, 6122, 6160, 6142, 6125, 6161, 51373, 6167, 6209, 6187, 9045, 6210, 6139, 6173, 6137, 6171, 6170, 23521, 6133, 6218, 6154, 6152, 6227, 6224, 80705, 10109, 6129	115	368	6200	3.95558	3.81666e-07	1.27222e-07	1.93131e-06
GOTERM_CC_FAT	GO:0005829~cytosol	38	26.7606	1.37004e-06	6146, 6122, 6160, 6142, 6125, 6161, 50649, 1915, 6167, 6209, 6187, 9045, 6210, 1974, 6139, 81605, 6173, 9520, 677, 6137, 6171, 6170, 23521, 6133, 3735, 54583, 3398, 6154, 6218, 6152, 6230, 51070, 6227, 23263, 6224, 9662, 6129, 3646	115	915	6172	2.2289	0.000260274	3.2538e-05	0.00170276
[truncated: 469 more rows]

## Sheet: Functional cluster 7
Annotation Cluster 1	Enrichment Score: 2.004062743902773
[truncated: 727 more rows]

## Sheet: Functional cluster 8
Annotation Cluster 1	Enrichment Score: 3.935594344047403
[truncated: 1,050 more rows]

[truncated: 8 more sheets: Functional cluster 9, Functional cluster 10, Functional cluster 11, Functional cluster 12, Functional cluster 13, Functional cluster 14, Functional cluster 15, Functional cluster 16]
